# Supplementary material for: Palladium-catalyzed directing group assisted and regioselectivity reversed cyclocarbonylation of arylallenes with 2-iodoanilines
Source: Royal Society of Chemistry journal article supplement (doi:10.1039/d0qo01404d), 2020-12-08
Supplement: d0qo01404d1.pdf [file d0qo01404d1.pdf]

# Palladium-Catalyzed Directing Group Assisted and Regioselectivity Reversed Cyclocarbonylation of Aryllallenes with 2-Iodoanilines

Jian-Shu Wang,<sup>+,a</sup> Lingyun Yao,<sup>+,a</sup> Jun Ying,<sup>\*,a</sup> Xiaoling Luo,<sup>b\*</sup> and Xiao-Feng Wu<sup>\*,a,c</sup>

<sup>a</sup> Department of Chemistry, Zhejiang Sci-Tech University, Xia sha Campus, Hangzhou 310018, People's Republic of China

<sup>b</sup> Chongqing Key Laboratory of Inorganic Functional Materials, College of Chemistry, Chongqing Normal University, 401331 Chongqing, China

<sup>c</sup> Leibniz-Institut für Katalyse e. V. an der Universität Rostock, Albert-Einstein-Straße 29a, 18059 Rostock, Germany.

## Supporting Information

### Table of Contents

|                                                                                                                   |      |
|-------------------------------------------------------------------------------------------------------------------|------|
| 1. General experimental information .....                                                                         | S1   |
| 2. Preparation of benzene-1,3,5-triyl triformate (TFBen).....                                                     | S1   |
| 3. General procedure for the synthesis of ( <i>N</i> -SO <sub>2</sub> Py)-2-iodoanilines (1a-1l).....             | S2   |
| 4. General procedure for the synthesis of allenes (2a-2w).....                                                    | S3   |
| 5. General procedure for the synthesis of 2,3-dihydroquinolin-4( <i>1H</i> )-ones.....                            | S4   |
| 5.1 General procedure for the synthesis of 2,3-dihydroquinolin-4( <i>1H</i> )-ones (3aa-3aw).....                 | S4   |
| 5.2 General procedure for the synthesis of 2,3-dihydroquinolin-4( <i>1H</i> )-ones (3ba-3la).....                 | S5   |
| 6. Transformation 3aa into compounds 4-6.....                                                                     | S5   |
| 7. Removal of the <i>N</i> -SO <sub>2</sub> Py directing group of 6.....                                          | S7   |
| 8. Preparation of compound 17 .....                                                                               | S8   |
| 9. Characterization data of compounds 1a-1l and 2a-2w .....                                                       | S8   |
| 10. Characterization data of products 3aa-3aw and 3ba-3la.....                                                    | S17  |
| 11. Characterization data of compounds 4-6, 7, 12, 17 and 18 .....                                                | S31  |
| 12. References.....                                                                                               | S35  |
| 13. X-ray crystal data for compound 3aa .....                                                                     | S36  |
| 14. <sup>1</sup> H, <sup>13</sup> C spectra of 1a-1l, 2a-2w, 3aa-3aw, 3ba-3la, 4-6, 7, 12, 15/15', 17 and 18..... | S37  |
| 15. Computational Methods .....                                                                                   | S115 |

## 1. General experimental information

Unless otherwise noted, all reactions were carried out under a nitrogen atmosphere. All commercially available reagents were used without further purification. All of the solvents were treated according to known methods. Column chromatography was performed on silica gel (200-400 mesh).  $^1\text{H}$  NMR (400 MHz) chemical shifts were reported in ppm ( $\delta$ ) relative to tetramethylsilane (TMS) with the solvent resonance employed as the internal standard.  $^{13}\text{C}$  NMR (100 MHz) chemical shifts were reported in ppm ( $\delta$ ) from tetramethylsilane (TMS) with the solvent resonance as the internal standard. Data were reported as follows: chemical shift, multiplicity (s = singlet, d = doublet, t = triplet, q = quartet, dd = doublet of doublets, td = triplet of doublets, qd = quartet of doublets, m = multiplet), coupling constants (Hz) and integration. HRMS measurements were obtained on a TOF analyzer.

## 2. Preparation of benzene-1,3,5-triyl triformate (TFBen)<sup>1</sup>

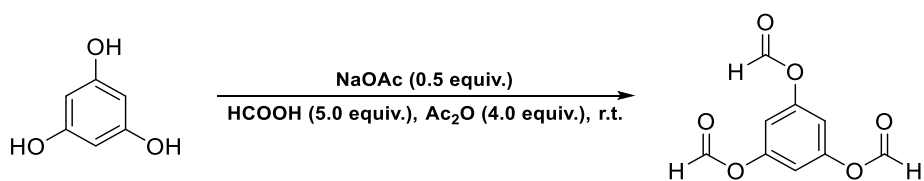

Formic acid (8.4 mL, 222.8 mmol, 5.0 equiv.) was added to acetic anhydride (16.8 mL, 178.2 mmol, 4.0 equiv.) at rt. The mixture was stirred at 60 °C for 1 h and cooled to rt. The resulting solution was poured into a flask containing 1,3,5-trihydroxybenzene (5.62 g, 44.6 mmol, 1.0 equiv.) and AcONa (1.83 g, 22.3 mmol, 0.5 equiv.). The mixture was stirred for 4 h in a water bath and then diluted with toluene (100 mL), washed with H<sub>2</sub>O (50 mL) twice. Keep the organic phase in fridge (2-8 °C) for overnight. Then filtered and dried in vacuo to afford the desired product benzene-1,3,5-triyl triformate (TFBen) as a white solid (5.1 g, 55% yield).

### 3. General procedure for the synthesis of (*N*-SO<sub>2</sub>Py)-2-iodoanilines (**1a-1l**)

The (*N*-SO<sub>2</sub>Py)-2-iodoanilines **1a-1d** and **1h-1l** were prepared according to a general procedure reported by Carretero.<sup>2</sup>

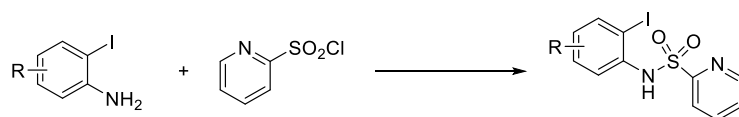

To a solution of 2-iodoaniline (4.0 mmol, 1.0 equiv.) in THF (40 mL), pyridine (379.7 mg, 4.8 mmol, 1.2 equiv.) and 2-pyridylsulfonyl chloride (852.5 mg, 4.8 mmol, 1.2 equiv.) were successively added dropwise at 0 °C under N<sub>2</sub> atmosphere. The mixture was warmed to room temperature and stirred overnight. During this time, a gradual formation of a precipitate was observed. The resulting mixture was then suction filtered through a 6-cm fritted glass funnel (coarse) into a round-bottomed flask, and the filter cake was rinsed with THF (3 × 10 mL). To the resulting filtrate and the washes, water (20 mL) was added and the THF was removed by evaporation at reduced pressure, yielding a suspension of a white solid in the aqueous medium. This solid was collected by filtration, washed sequentially with toluene (2 × 5 mL) and diethyl ether (2 × 5 mL). Then it was transferred to a round-bottomed flask, and dried over anhydrous Na<sub>2</sub>SO<sub>4</sub>, filtered, and concentrated. The crude mixture was purified by silica gel column chromatography to obtain (*N*-SO<sub>2</sub>Py)-2-iodoanilines **1a-1d** and **1h-1l**.

The (*N*-SO<sub>2</sub>Py)-2-iodoanilines **1e-1g** were prepared according to a general procedure reported by Chan.<sup>3</sup>

To a solution of 2-iodoaniline (5.0 mmol, 1.0 equiv.) in pyridine (5 mL) was added pyridine-2-sulfonyl chloride (1.33 g, 7.5 mmol, 1.5 equiv.) at 0 °C under N<sub>2</sub> atmosphere and the resulting reaction mixture was stirred at room temperature for 2 h. The reaction mixture was quenched with the addition of DCM (30 mL) followed by HCl (50 mL, 1M). The organic layer was extracted and washed with water (2 × 10 mL), brine (10 mL), dried over Na<sub>2</sub>SO<sub>4</sub> and concentrated under reduced pressure. The crude product was purified by flash column chromatography to obtain (*N*-SO<sub>2</sub>Py)-2-iodoanilines **1e-1g**.

#### 4. General procedure for the synthesis of allenes (2a-2w)

The allenes **2a-2v** were prepared according to a general procedure reported by Baird.<sup>4</sup>

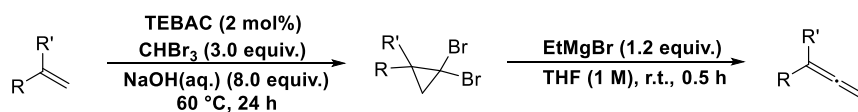

To a mixture of alkene (20.0 mmol, 1.0 equiv.), bromoform (15.2 g, 60.0 mmol, 3.0 equiv.), and TEBAC (91.1 mg, 0.4 mmol, 0.02 equiv.) was added dropwise a solution of NaOH (6.4 g) in water (6.4 mL) over 1 h. The resulting mixture was stirred vigorously at 60 °C for 24 h, then cooled to room temperature, and quenched with water (50 mL). The mixture was extracted with dichloromethane and the organic phase was separated, dried over Na<sub>2</sub>SO<sub>4</sub>, and concentrated. The residue was purified by column chromatography over silica gel with petroleum ether as eluent to give 1,1-dibromocyclopropanes.

To a stirred solution of 1,1-dibromocyclopropane (10.0 mmol) in dry THF (10 mL) at rt was added dropwise EtMgBr (12 mL, 12.0 mmol, 1.0 M in THF) under N<sub>2</sub> over 0.5 h. Then the mixture was quenched with NH<sub>4</sub>Cl(sat.) (20 mL) and diluted with petroleum ether (50 mL). The organic phase was washed with water (50 mL), dried over anhydrous Na<sub>2</sub>SO<sub>4</sub>, and concentrated. The residue was purified by column chromatography over silica gel with petroleum ether as eluent to give the allenes **2a-2v**.

The allene **2w** was prepared according to a procedure reported by van Dam and Tsuji.<sup>5,6</sup>

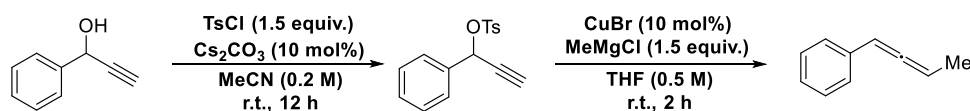

To a solution of alcohol (20.0 mmol) in MeCN (100 mL) *p*-toluenesulfonyl chloride (5.7 g, 30.0 mmol, 1.5 equiv.), and Cs<sub>2</sub>CO<sub>3</sub> (651.6 mg, 2.0 mmol 10 mol%) were added. The reaction mixture was stirred rapidly at rt for 12 h. The progress of the reaction was monitored by thin-layer chromatography (TLC). After completion of the reaction, the mixture was diluted with water (100 mL) and the product was extracted with diethyl ether (2×100 mL). The organic extract was then washed with saturated solution of NaHCO<sub>3</sub> (2×100 mL), saline (2×100 mL) and water (100 mL). After drying over anhydrous Na<sub>2</sub>SO<sub>4</sub>, volatiles were evaporated under reduced pressure, residue



was dissolved in a mixture of ethyl acetate: petroleum ether 1:5 and purified *via* flash chromatography over silica gel.

A mixture of CuBr (143.5 mg, 1.0 mmol), THF (0.5 M) and the tosylate (10.0 mmol) was cooled to 0 °C. MeMgCl (5.0 mL, 15.0 mmol, 3.0 M in THF) was added dropwise. The reaction mixture was allowed to warm to room temperature and stirred for 2 h. It was quenched by addition of a saturated aqueous solution of NH<sub>4</sub>Cl followed by extraction with Et<sub>2</sub>O. The combined organic phases were washed with brine and dried over Na<sub>2</sub>SO<sub>4</sub>. The solvents were removed under reduced pressure and the residue was purified by column chromatography over silica gel with petroleum ether as eluent to give the allene **2w**.

## 5. General procedure for the synthesis of 2,3-dihydroquinolin-4(1*H*)-ones

### 5.1 General procedure for the synthesis of 2,3-dihydroquinolin-4(1*H*)-ones (**3aa-3aw**)

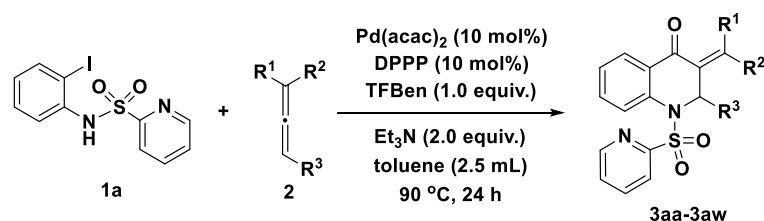

**1a** (180.1 mg, 0.5 mmol, 1.0 equiv.), Pd(acac)<sub>2</sub> (15.2 mg, 0.05 mmol, 10 mol%), DPPP (20.6 mg, 0.05 mmol, 10 mol%), and a 2.5 mL vial containing TFBen (105.1 mg, 0.5 mmol, 1.0 equiv.) were added to an oven-dried tube (15 mL) which was then placed under vacuum and refilled with nitrogen three times. **2** (2.5 equiv.), Et<sub>3</sub>N (101.2 mg, 1.0 mmol, 2.0 equiv.) and toluene (2.5 mL) were added into the tube via syringe. The tube was sealed and stirred at 90 °C for 24 h. Upon the reaction was completed, the resulting mixture was concentrated under vacuum and purified by silica gel column using chromatography (petroleum ether/ ethyl acetate = 5:1) to obtain the products **3aa-3aw**.

## 5.2 General procedure for the synthesis of 2,3-dihydroquinolin-4(1*H*)-ones (3ba-3la)

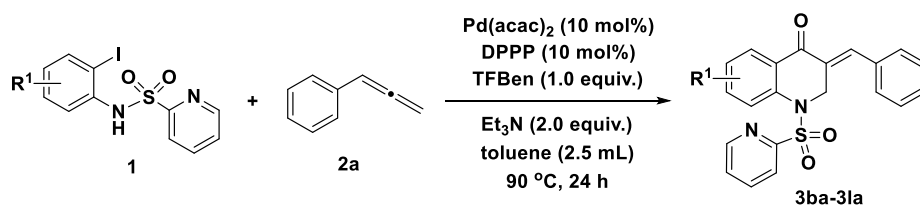

**1** (0.5 mmol, 1.0 equiv.), Pd(acac)<sub>2</sub> (15.2 mg, 0.05 mmol, 10 mol%), DPPP (20.6 mg, 0.05 mmol, 10 mol%), and a 2.5 mL vial containing TFBen (105.1 mg, 0.5 mmol, 1.0 equiv.) were added to an oven-dried tube (15 mL) which was then placed under vacuum and refilled with nitrogen three times. **2a** (145.2 mg, 1.25 mmol, 2.5 equiv.), Et<sub>3</sub>N (101.2 mg, 1.0 mmol, 2.0 equiv.) and toluene (2.5 mL) were added into the tube *via* syringe. The tube was sealed and stirred at 90 °C for 24 h. Upon the reaction was completed, the resulting mixture was concentrated under vacuum and purified by silica gel column using chromatography (petroleum ether/ ethyl acetate = 5:1) to obtain the products **3ba-3la**.

## 6. Transformation 3aa into compounds 4-6

Compound **4** was prepared according to a general procedure reported by Zhao.<sup>7</sup>

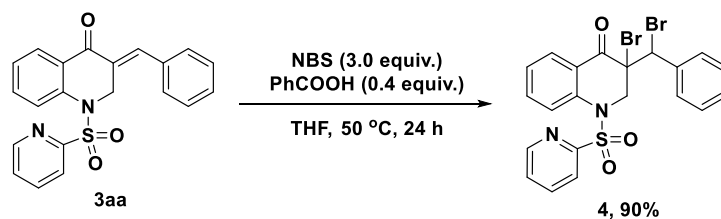

To a solution of **3aa** (0.5 mmol, 1.0 equiv.) in THF (3 mL) was added NBS (267.0 mg, 1.5 mmol, 3.0 equiv.) and benzoic acid (24.4 mg, 0.2 mmol, 0.4 equiv.). The mixture was stirred for 24 h at room temperature. Upon the reaction was completed, the mixture was poured into water (10 mL) and extracted with CH<sub>2</sub>Cl<sub>2</sub> (3 × 10 mL). The combined organic phase was washed with water (3 × 10 mL), and dried over anhydrous Na<sub>2</sub>SO<sub>4</sub>. The solvent was removed under reduced pressure, and the residue was purified by silica gel column using chromatography to obtain compound **4** (241.3 mg, 90% yield).





## 8. Preparation of compound 17

Compound 17 was prepared according to a general procedure reported by Zi.<sup>11</sup>

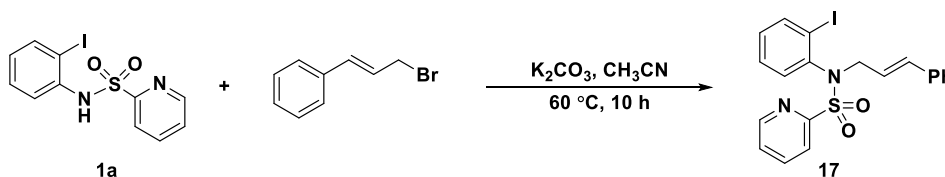

The allylic bromide (394.2 mg, 2.0 mmol, 2.0 equiv.) was added to a solution of 2-iodoaniline (1.0 mmol, 1.0 equiv.) and anhydrous K<sub>2</sub>CO<sub>3</sub> (207.3 mg, 1.5 mmol, 1.5 equiv.) in CH<sub>3</sub>CN (10 mL, 0.2 M) at 60 °C. The reaction mixture was stirred at 60 °C overnight then it was poured into cold water and extracted with ethyl acetate. The combined organic extracts were washed with water, aqueous KOH solution (10%), Na<sub>2</sub>S<sub>2</sub>O<sub>3</sub> solution (10%) and brine. Then it was dried over Na<sub>2</sub>SO<sub>4</sub>, filtered and concentrated under reduced pressure. The residue was eluted through a silica column to obtain compound 17 (381.1 mg, 80% yield).

## 9. Characterization data of compounds 1a-1l and 2a-2w

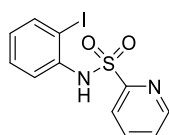

**N-(2-iodophenyl)pyridine-2-sulfonamide (1a).** White solid in 75% yield, mp 178.9 – 180.4 °C; <sup>1</sup>H NMR (400 MHz, CDCl<sub>3</sub>) δ 8.69 (d, *J* = 4.2 Hz, 1H), 7.91 (d, *J* = 7.8 Hz, 1H), 7.85 (td, *J* = 7.7, 1.7 Hz, 1H), 7.67 (dd, *J* = 8.1, 1.1 Hz, 2H), 7.48 (ddd, *J* = 7.5, 4.7, 1.2 Hz, 1H), 7.31 – 7.26 (m, 1H), 7.09 (s, 1H), 6.82 (td, *J* = 7.9, 1.5 Hz, 1H); <sup>13</sup>C NMR (100 MHz, CDCl<sub>3</sub>) δ 156.5, 150.5, 139.4, 138.1, 137.6, 129.6, 127.3, 127.0, 122.8, 122.5, 92.0.

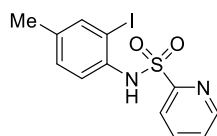

**N-(2-iodo-4-methylphenyl)pyridine-2-sulfonamide (1b).** White solid in 70% yield, mp 144.3 – 145.6 °C; <sup>1</sup>H NMR (400 MHz, CDCl<sub>3</sub>) δ 8.68 (d, *J* = 4.6 Hz, 1H), 7.86 – 7.81 (m, 2H), 7.50 – 7.45 (m, 3H), 7.07 (d, *J* = 10.3 Hz, 2H), 2.21 (s, 3H); <sup>13</sup>C NMR (100 MHz, CDCl<sub>3</sub>) δ 156.4, 150.4, 139.6,

138.1, 137.5, 134.9, 130.3, 127.3, 123.2, 122.8, 92.8, 20.4.

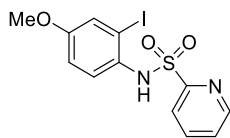

***N*-(2-iodo-4-methoxyphenyl)pyridine-2-sulfonamide (1c)**. White solid in 69% yield, mp 155.4–156.8 °C; <sup>1</sup>H NMR (400 MHz, CDCl<sub>3</sub>) δ 8.70 (d, *J* = 4.6 Hz, 1H), 7.85 – 7.79 (m, 2H), 7.50 – 7.47 (m, 2H), 7.18 (d, *J* = 2.8 Hz, 1H), 6.94 (s, 1H), 6.84 (dd, *J* = 8.9, 2.8 Hz, 1H), 3.73 (s, 3H); <sup>13</sup>C NMR (100 MHz, CDCl<sub>3</sub>) δ 158.1, 156.6, 150.4, 138.1, 130.5, 127.2, 125.8, 124.3, 122.9, 115.1, 94.8, 55.8.

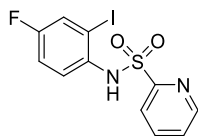

***N*-(4-fluoro-2-iodophenyl)pyridine-2-sulfonamide (1d)**. White solid in 73% yield, mp 143.8 – 145.2 °C; <sup>1</sup>H NMR (400 MHz, CDCl<sub>3</sub>) δ 8.70 (dt, *J* = 4.7, 1.2 Hz, 1H), 7.86 (dd, *J* = 4.9, 1.2 Hz, 2H), 7.61 (dd, *J* = 9.0, 5.3 Hz, 1H), 7.50 (dd, *J* = 8.8, 4.7 Hz, 1H), 7.39 (dd, *J* = 7.6, 2.9 Hz, 1H), 7.09 (s, 1H), 7.03 (ddd, *J* = 9.0, 7.8, 2.9 Hz, 1H); <sup>13</sup>C NMR (100 MHz, CDCl<sub>3</sub>) δ 161.1, 157.5 (d, *J* = 222.8 Hz, 1C), 150.4, 138.2, 134.0, 127.4, 126.0 (d, *J* = 24.8 Hz, 1C), 124.9 (d, *J* = 8.0 Hz, 1C), 122.8, 116.5 (d, *J* = 22.1 Hz, 1C), 93.0 (d, *J* = 8.0 Hz, 1C).

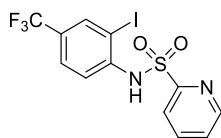

***N*-(2-iodo-4-(trifluoromethyl)phenyl)pyridine-2-sulfonamide (1e)**. White solid in 81% yield, mp 118.7 – 120.3 °C; <sup>1</sup>H NMR (400 MHz, CDCl<sub>3</sub>) δ 8.67 (d, *J* = 4.5 Hz, 1H), 7.99 (d, *J* = 7.9 Hz, 1H), 7.92 – 7.88 (m, 2H), 7.80 (d, *J* = 8.6 Hz, 1H), 7.51 (dd, *J* = 7.2, 5.4 Hz, 2H), 7.35 (s, 1H); <sup>13</sup>C NMR (100 MHz, CDCl<sub>3</sub>) δ 156.2, 150.5, 140.9, 138.4, 136.3 (q, *J* = 3.7 Hz, 1C), 128.2 (q, *J* = 33.4 Hz, 1C), 127.7, 126.7 (q, *J* = 3.4 Hz, 1C), 122.8 (q, *J* = 272.4 Hz, 1C), 122.7, 120.7, 90.1.

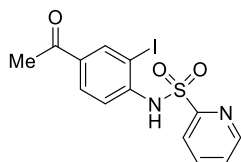

***N*-(4-acetyl-2-iodophenyl)pyridine-2-sulfonamide (1f).** White solid in 86% yield, mp 164.3 – 166.8 °C; <sup>1</sup>H NMR (400 MHz, CDCl<sub>3</sub>) δ 8.67 (d, *J* = 4.5 Hz, 1H), 8.28 (d, *J* = 1.8 Hz, 1H), 8.00 (d, *J* = 7.8 Hz, 1H), 7.90 (td, *J* = 7.8, 1.5 Hz, 1H), 7.83 (dd, *J* = 8.6, 1.7 Hz, 1H), 7.76 (d, *J* = 8.6 Hz, 1H), 7.50 (dd, *J* = 7.3, 4.9 Hz, 1H), 7.37 (s, 1H), 2.51 (s, 3H); <sup>13</sup>C NMR (100 MHz, CDCl<sub>3</sub>) δ 195.5, 156.2, 150.6, 141.7, 139.6, 138.3, 134.7, 129.8, 127.6, 122.8, 119.8, 90.3, 26.5.

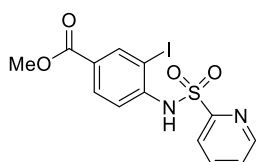

**methyl 3-iodo-4-(pyridine-2-sulfonamido)benzoate (1g).** White solid in 71% yield, mp 152.8 – 154.1 °C; <sup>1</sup>H NMR (400 MHz, CDCl<sub>3</sub>) δ 8.67 (d, *J* = 4.5 Hz, 1H), 8.35 (s, 1H), 7.99 (d, *J* = 7.8 Hz, 1H), 7.89 (dd, *J* = 15.4, 8.1 Hz, 2H), 7.74 (d, *J* = 8.2 Hz, 1H), 7.49 (dd, *J* = 7.6, 4.7 Hz, 1H), 7.35 (s, 1H), 3.87 (s, 3H); <sup>13</sup>C NMR (100 MHz, CDCl<sub>3</sub>) δ 165.0, 156.1, 150.4, 141.5, 140.6, 138.1, 130.8, 127.7, 127.5, 122.7, 119.6, 89.6, 52.4.

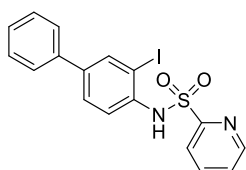

***N*-(3-iodo-[1,1'-biphenyl]-4-yl)pyridine-2-sulfonamide (1h).** White solid in 77% yield, mp 133.8 – 135.6 °C; <sup>1</sup>H NMR (400 MHz, CDCl<sub>3</sub>) δ 8.71 (d, *J* = 4.2 Hz, 1H), 7.95 (d, *J* = 7.9 Hz, 1H), 7.90 (d, *J* = 2.0 Hz, 1H), 7.87 (td, *J* = 7.8, 1.6 Hz, 1H), 7.72 (d, *J* = 8.5 Hz, 1H), 7.52 – 7.49 (m, 2H), 7.48 – 7.46 (m, 2H), 7.40 (t, *J* = 7.4 Hz, 2H), 7.35 – 7.32 (m, 1H), 7.19 (s, 1H); <sup>13</sup>C NMR (100 MHz, CDCl<sub>3</sub>) δ 156.4, 150.5, 140.1, 138.6, 138.2, 137.7, 136.6, 129.0, 128.2, 128.0, 127.4, 126.9, 122.8, 122.7, 92.7.

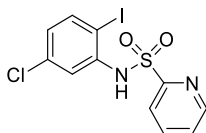

***N*-(5-chloro-2-iodophenyl)pyridine-2-sulfonamide (1i).** White solid in 65% yield, mp 171.5 – 172.8 °C; <sup>1</sup>H NMR (400 MHz, CDCl<sub>3</sub>) δ 8.70 (dd, *J* = 4.6, 0.6 Hz, 1H), 7.96 (d, *J* = 7.8 Hz, 1H), 7.89 (td, *J* = 7.7, 1.7 Hz, 1H), 7.70 (d, *J* = 2.4 Hz, 1H), 7.58 (d, *J* = 8.5 Hz, 1H), 7.51 (ddd, *J* = 7.5, 4.7, 1.1 Hz, 1H), 7.11 (s, 1H), 6.82 (dd, *J* = 8.5, 2.4 Hz, 1H); <sup>13</sup>C NMR (100 MHz, CDCl<sub>3</sub>) δ 156.2, 150.6, 139.9, 138.7, 138.3, 135.7, 127.5, 127.0, 122.8, 122.0, 88.6.

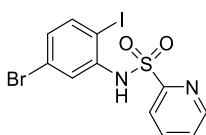

***N*-(5-bromo-2-iodophenyl)pyridine-2-sulfonamide (1j).** White solid in 55% yield, mp 179.1 – 180.5 °C; <sup>1</sup>H NMR (400 MHz, CDCl<sub>3</sub>) δ 8.70 (d, *J* = 4.6 Hz, 1H), 7.96 (d, *J* = 7.8 Hz, 1H), 7.89 (td, *J* = 7.7, 1.6 Hz, 1H), 7.84 (d, *J* = 2.2 Hz, 1H), 7.53 – 7.49 (m, 2H), 7.09 (s, 1H), 6.96 (dd, *J* = 8.4, 2.2 Hz, 1H); <sup>13</sup>C NMR (100 MHz, CDCl<sub>3</sub>) δ 156.2, 150.6, 140.2, 138.9, 138.3, 129.9, 127.5, 124.9, 123.4, 122.9, 89.5.

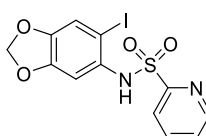

***N*-(6-iodobenzo[d][1,3]dioxol-5-yl)pyridine-2-sulfonamide (1k).** White solid in 90% yield, mp 178.2 – 181.1 °C; <sup>1</sup>H NMR (400 MHz, CDCl<sub>3</sub>) δ 8.71 – 8.69 (m, 1H), 7.88 – 7.83 (m, 2H), 7.51 – 7.48 (m, 1H), 7.23 (s, 1H), 7.04 (s, 1H), 6.82 (s, 1H), 5.97 (s, 2H); <sup>13</sup>C NMR (100 MHz, CDCl<sub>3</sub>) δ 156.6, 150.5, 149.2, 146.8, 138.2, 131.7, 127.3, 122.9, 117.6, 106.0, 102.4, 81.9.

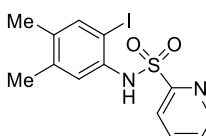

***N*-(2-iodo-4,5-dimethylphenyl)pyridine-2-sulfonamide (1l).** White solid in 76% yield, mp 209.8 – 211.5 °C; <sup>1</sup>H NMR (400 MHz, DMSO-*d*<sub>6</sub>) δ 9.82 (s, 1H), 8.75 (d, *J* = 4.0 Hz, 1H), 8.06 – 8.03 (m,



1H), 7.81 (d,  $J = 7.8$  Hz, 1H), 7.68 (dd,  $J = 6.9, 4.9$  Hz, 1H), 7.58 (s, 1H), 6.83 (s, 1H), 2.12 (s, 3H), 2.04 (s, 3H);  $^{13}\text{C}$  NMR (100 MHz, DMSO- $d_6$ )  $\delta$  157.5, 150.0, 139.6, 138.6, 137.6, 137.1, 135.7, 129.5, 127.2, 122.2, 95.8, 19.0, 18.2.

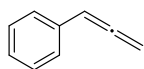

**propa-1,2-dien-1-ylbenzene (2a).** Colorless oil in 65% yield;  $^1\text{H}$  NMR (400 MHz,  $\text{CDCl}_3$ )  $\delta$  7.45 – 7.44 (m, 4H), 7.36 – 7.33 (m, 1H), 6.31 (td,  $J = 6.7, 2.0$  Hz, 1H), 5.28 (d,  $J = 6.8$  Hz, 2H);  $^{13}\text{C}$  NMR (100 MHz,  $\text{CDCl}_3$ )  $\delta$  209.9, 134.0, 128.7, 127.0, 126.8, 94.1, 78.9.

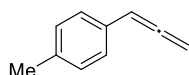

**1-methyl-4-(propa-1,2-dien-1-yl)benzene (2b).** Colorless oil in 68% yield;  $^1\text{H}$  NMR (400 MHz,  $\text{CDCl}_3$ )  $\delta$  7.32 (d,  $J = 8.1$  Hz, 2H), 7.24 (d,  $J = 8.0$  Hz, 2H), 6.27 (t,  $J = 6.8$  Hz, 1H), 5.25 (d,  $J = 6.8$  Hz, 2H), 2.45 (s, 3H);  $^{13}\text{C}$  NMR (100 MHz,  $\text{CDCl}_3$ )  $\delta$  209.7, 136.7, 131.0, 129.5, 126.7, 93.9, 78.8, 21.3.

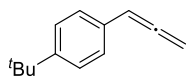

**1-(tert-butyl)-4-(propa-1,2-dien-1-yl)benzene (2c).** Colorless oil in 71% yield;  $^1\text{H}$  NMR (400 MHz,  $\text{CDCl}_3$ )  $\delta$  7.44 – 7.41 (m, 2H), 7.32 (d,  $J = 8.4$  Hz, 2H), 6.23 (t,  $J = 6.8$  Hz, 1H), 5.20 (d,  $J = 6.8$  Hz, 2H), 1.40 (s, 9H);  $^{13}\text{C}$  NMR (100 MHz,  $\text{CDCl}_3$ )  $\delta$  209.9, 150.1, 131.1, 126.5, 125.7, 93.7, 78.7, 34.7, 31.5.

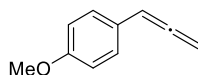

**1-methoxy-4-(propa-1,2-dien-1-yl)benzene (2d).** Colorless oil in 73% yield;  $^1\text{H}$  NMR (400 MHz,  $\text{CDCl}_3$ )  $\delta$  7.36 (d,  $J = 8.4$  Hz, 2H), 6.98 (d,  $J = 8.5$  Hz, 2H), 6.26 (t,  $J = 6.8$  Hz, 1H), 5.25 (d,  $J = 6.8$  Hz, 2H), 3.91 (s, 3H);  $^{13}\text{C}$  NMR (100 MHz,  $\text{CDCl}_3$ )  $\delta$  209.4, 158.8, 127.9, 126.2, 114.2, 93.5, 78.9, 55.3.

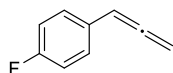

**1-fluoro-4-(propa-1,2-dien-1-yl)benzene (2e).** Colorless oil in 72% yield;  $^1\text{H}$  NMR (400 MHz,  $\text{CDCl}_3$ )  $\delta$  7.33 – 7.30 (m, 2H), 7.06 (t,  $J = 8.7$  Hz, 2H), 6.20 (t,  $J = 6.8$  Hz, 1H), 5.21 (d,  $J = 6.8$  Hz, 2H);  $^{13}\text{C}$  NMR (100 MHz,  $\text{CDCl}_3$ )  $\delta$  209.7, 162.0 (d,  $J = 245.8$  Hz, 1C), 130.0 (d,  $J = 3.0$  Hz, 1C), 128.2 (d,  $J = 7.9$  Hz, 1C), 115.7 (d,  $J = 21.7$  Hz, 1C), 93.2, 79.1.

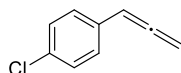

**1-chloro-4-(propa-1,2-dien-1-yl)benzene (2f).** Colorless oil in 74% yield;  $^1\text{H}$  NMR (400 MHz,  $\text{CDCl}_3$ )  $\delta$  7.30 – 7.28 (m, 2H), 7.24 – 7.22 (m, 2H), 6.14 (t,  $J = 6.8$  Hz, 1H), 5.18 (d,  $J = 6.8$  Hz, 2H);  $^{13}\text{C}$  NMR (100 MHz,  $\text{CDCl}_3$ )  $\delta$  209.9, 132.6, 132.5, 128.9, 128.0, 93.3, 79.3.

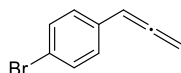

**1-bromo-4-(propa-1,2-dien-1-yl)benzene (2g).** Colorless oil in 76% yield;  $^1\text{H}$  NMR (400 MHz,  $\text{CDCl}_3$ )  $\delta$  7.49 – 7.47 (m, 2H), 7.21 (d,  $J = 8.4$  Hz, 2H), 6.17 (t,  $J = 6.8$  Hz, 1H), 5.21 (d,  $J = 6.8$  Hz, 2H);  $^{13}\text{C}$  NMR (100 MHz,  $\text{CDCl}_3$ )  $\delta$  209.9, 133.1, 131.8, 128.3, 120.6, 93.3, 79.4.

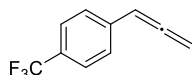

**1-(propa-1,2-dien-1-yl)-4-(trifluoromethyl)benzene (2h).** Colorless oil in 75% yield;  $^1\text{H}$  NMR (400 MHz,  $\text{CDCl}_3$ )  $\delta$  7.55 (d,  $J = 8.2$  Hz, 2H), 7.39 (d,  $J = 8.1$  Hz, 2H), 6.20 (t,  $J = 6.8$  Hz, 1H), 5.22 (d,  $J = 6.8$  Hz, 2H);  $^{13}\text{C}$  NMR (100 MHz,  $\text{CDCl}_3$ )  $\delta$  210.6, 138.1, 128.9 (q,  $J = 32.5$  Hz, 1C), 126.9, 125.7 (q,  $J = 3.0$  Hz, 1C), 123.0, 93.4, 79.5.

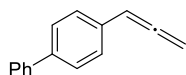

**4-(propa-1,2-dien-1-yl)-1,1'-biphenyl (2i).** Yellow solid in 80% yield, mp 54.1 – 55.6 °C;  $^1\text{H}$  NMR (400 MHz,  $\text{CDCl}_3$ )  $\delta$  7.60 (d,  $J = 7.4$  Hz, 2H), 7.56 (d,  $J = 8.2$  Hz, 2H), 7.45 (t,  $J = 7.6$  Hz, 2H), 7.39 – 7.33 (m, 3H), 6.22 (t,  $J = 6.8$  Hz, 1H), 5.19 (d,  $J = 6.8$  Hz, 2H);  $^{13}\text{C}$  NMR (100 MHz,  $\text{CDCl}_3$ )  $\delta$  210.0, 140.8, 139.7, 133.0, 128.8, 127.4, 127.2, 127.1, 126.9, 93.6, 79.0.

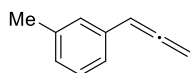

**1-methyl-3-(propa-1,2-dien-1-yl)benzene (2j).** Colorless oil in 80% yield;  $^1\text{H}$  NMR (400 MHz,  $\text{CDCl}_3$ )  $\delta$  7.38 (t,  $J = 7.5$  Hz, 1H), 7.31 – 7.28 (m, 2H), 7.21 – 7.19 (m, 1H), 6.32 (t,  $J = 6.8$  Hz, 1H), 5.31 (d,  $J = 6.8$  Hz, 2H), 2.52 (s, 3H);  $^{13}\text{C}$  NMR (100 MHz,  $\text{CDCl}_3$ )  $\delta$  210.0, 138.3, 133.9, 128.6, 127.9, 127.5, 124.0, 94.1, 78.7, 21.4.

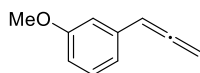

**1-methoxy-3-(propa-1,2-dien-1-yl)benzene (2k).** Colorless oil in 85% yield;  $^1\text{H}$  NMR (400 MHz,  $\text{CDCl}_3$ )  $\delta$  7.30 (t,  $J = 7.9$  Hz, 1H), 7.00 – 6.92 (m, 2H), 6.84 (dd,  $J = 8.2, 2.4$  Hz, 1H), 6.23 (t,  $J = 6.8$  Hz, 1H), 5.23 (d,  $J = 6.8$  Hz, 2H), 3.88 (s, 3H);  $^{13}\text{C}$  NMR (100 MHz,  $\text{CDCl}_3$ )  $\delta$  209.9, 160.0, 135.5, 129.7, 119.4, 112.8, 111.9, 94.1, 79.0, 55.2.

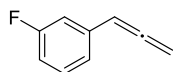

**1-fluoro-3-(propa-1,2-dien-1-yl)benzene (2l).** Colorless oil in 88% yield;  $^1\text{H}$  NMR (400 MHz,  $\text{CDCl}_3$ )  $\delta$  7.32 (dd,  $J = 14.2, 7.7$  Hz, 1H), 7.10 (dd,  $J = 15.7, 8.9$  Hz, 2H), 6.96 (t,  $J = 8.4$  Hz, 1H), 6.20 (t,  $J = 6.8$  Hz, 1H), 5.24 (d,  $J = 6.8$  Hz, 2H);  $^{13}\text{C}$  NMR (100 MHz,  $\text{CDCl}_3$ )  $\delta$  210.1, 163.3 (d,  $J = 245.2$  Hz, 1C), 136.6 (d,  $J = 7.8$  Hz, 1C), 130.1 (d,  $J = 8.4$  Hz, 1C), 122.6 (d,  $J = 2.5$  Hz, 1C), 113.9 (d,  $J = 21.5$  Hz, 1C), 113.4 (d,  $J = 22.3$  Hz, 1C), 93.5 (d,  $J = 2.5$  Hz, 1C), 79.4.

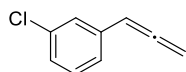

**1-chloro-3-(propa-1,2-dien-1-yl)benzene (2m).** Colorless oil in 85% yield;  $^1\text{H}$  NMR (400 MHz,  $\text{CDCl}_3$ )  $\delta$  7.36 (s, 1H), 7.31 – 7.27 (m, 1H), 7.24 – 7.21 (dd,  $J = 8.8, 4.5$  Hz, 2H), 6.17 (t,  $J = 6.8$  Hz, 1H), 5.25 (d,  $J = 6.8$  Hz, 2H);  $^{13}\text{C}$  NMR (100 MHz,  $\text{CDCl}_3$ )  $\delta$  210.0, 136.1, 134.7, 129.9, 127.0, 126.7, 125.0, 93.2, 79.5.

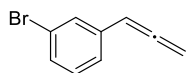

**1-bromo-3-(propa-1,2-dien-1-yl)benzene (2n).** Colorless oil in 83% yield;  $^1\text{H}$  NMR (400 MHz,  $\text{CDCl}_3$ )  $\delta$  7.52 (s, 1H), 7.38 (d,  $J = 7.6$  Hz, 1H), 7.23 (dt,  $J = 15.3, 7.7$  Hz, 2H), 6.16 (t,  $J = 6.8$  Hz,

1H), 5.25 (d,  $J = 6.8$  Hz, 2H);  $^{13}\text{C}$  NMR (100 MHz,  $\text{CDCl}_3$ )  $\delta$  210.0, 136.4, 130.1, 129.9, 129.6, 125.4, 122.9, 93.1, 79.5.

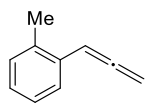

**1-methyl-2-(propa-1,2-dien-1-yl)benzene (2o).** Colorless oil in 60% yield;  $^1\text{H}$  NMR (400 MHz,  $\text{CDCl}_3$ )  $\delta$  7.62 (d,  $J = 7.6$  Hz, 1H), 7.39–7.29 (m, 3H), 6.56 (t,  $J = 6.9$  Hz, 1H), 5.31 (d,  $J = 6.9$  Hz, 2H), 2.55 (s, 3H);  $^{13}\text{C}$  NMR (100 MHz,  $\text{CDCl}_3$ )  $\delta$  210.6, 135.0, 132.3, 130.6, 127.4, 127.0, 126.3, 91.4, 78.1, 20.0.

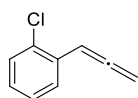

**1-chloro-2-(propa-1,2-dien-1-yl)benzene (2p).** Colorless oil in 72% yield;  $^1\text{H}$  NMR (400 MHz,  $\text{CDCl}_3$ )  $\delta$  7.55 (dd,  $J = 7.8, 1.4$  Hz, 1H), 7.40 (dd,  $J = 8.0, 1.1$  Hz, 1H), 7.27 (dd,  $J = 10.8, 4.2$  Hz, 1H), 7.20–7.16 (m, 1H), 6.70 (t,  $J = 6.8$  Hz, 1H), 5.25 (d,  $J = 6.9$  Hz, 2H);  $^{13}\text{C}$  NMR (100 MHz,  $\text{CDCl}_3$ )  $\delta$  210.6, 132.0, 131.8, 129.8, 128.3, 128.0, 126.9, 90.5, 79.1.

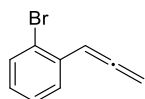

**1-bromo-2-(propa-1,2-dien-1-yl)benzene (2q).** Colorless oil in 76% yield;  $^1\text{H}$  NMR (400 MHz,  $\text{CDCl}_3$ )  $\delta$  7.59 (dd,  $J = 8.0, 0.8$  Hz, 1H), 7.55 (dd,  $J = 7.8, 1.4$  Hz, 1H), 7.31 (t,  $J = 7.5$  Hz, 1H), 7.12–7.08 (m, 1H), 6.71 (t,  $J = 6.8$  Hz, 1H), 5.25 (d,  $J = 6.8$  Hz, 2H);  $^{13}\text{C}$  NMR (100 MHz,  $\text{CDCl}_3$ )  $\delta$  210.7, 133.6, 133.0, 128.5, 128.3, 127.5, 122.5, 93.2, 79.1.

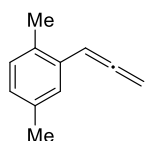

**1,4-dimethyl-2-(propa-1,2-dien-1-yl)benzene (2r).** Colorless oil in 58% yield;  $^1\text{H}$  NMR (400 MHz,  $\text{CDCl}_3$ )  $\delta$  7.32 (s, 1H), 7.14 (d,  $J = 7.7$  Hz, 1H), 7.03 (d,  $J = 7.6$  Hz, 1H), 6.44 (t,  $J = 6.8$  Hz,

1H), 5.22 (d,  $J = 6.9$  Hz, 2H), 2.42 (s, 6H);  $^{13}\text{C}$  NMR (100 MHz,  $\text{CDCl}_3$ )  $\delta$  210.4, 135.6, 131.9, 131.8, 130.5, 127.8, 127.7, 91.3, 78.0, 21.0, 19.4.

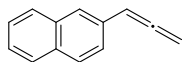

**2-(propa-1,2-dien-1-yl)naphthalene (2s).** Yellow solid in 85% yield, mp 42.5–44.7 °C;  $^1\text{H}$  NMR (400 MHz,  $\text{CDCl}_3$ )  $\delta$  7.82–7.78 (m, 3H), 7.67 (s, 1H), 7.52 (dd,  $J = 8.6, 1.5$  Hz, 1H), 7.49–7.42 (m, 2H), 6.36 (t,  $J = 6.8$  Hz, 1H), 5.24 (d,  $J = 6.8$  Hz, 2H);  $^{13}\text{C}$  NMR (100 MHz,  $\text{CDCl}_3$ )  $\delta$  210.4, 133.8, 132.7, 131.5, 128.4, 127.9, 127.8, 126.4, 125.8, 125.5, 124.8, 94.5, 79.3.

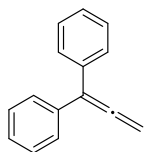

**propa-1,2-diene-1,1-diyl dibenzene (2t).** Colorless oil in 87% yield;  $^1\text{H}$  NMR (400 MHz,  $\text{CDCl}_3$ )  $\delta$  7.40–7.34 (m, 8H), 7.31–7.26 (m, 2H), 5.29 (s, 2H);  $^{13}\text{C}$  NMR (100 MHz,  $\text{CDCl}_3$ )  $\delta$  210.0, 136.4, 128.6, 127.4, 109.3, 78.2.

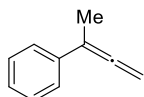

**buta-2,3-dien-2-yl benzene (2u).** Colorless oil in 69% yield;  $^1\text{H}$  NMR (400 MHz,  $\text{CDCl}_3$ )  $\delta$  7.55 (d,  $J = 7.6$  Hz, 2H), 7.45 (t,  $J = 7.7$  Hz, 2H), 7.32 (t,  $J = 7.3$  Hz, 1H), 5.15 (dd,  $J = 6.2, 3.1$  Hz, 2H), 2.23 (t,  $J = 3.2$  Hz, 3H);  $^{13}\text{C}$  NMR (100 MHz,  $\text{CDCl}_3$ )  $\delta$  209.1, 136.8, 128.4, 126.7, 125.8, 99.9, 77.0, 16.8.

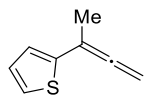

**2-(buta-2,3-dien-2-yl)thiophene (2v).** Colorless oil in 64% yield;  $^1\text{H}$  NMR (400 MHz,  $\text{CDCl}_3$ )  $\delta$  7.19 (d,  $J = 5.1$  Hz, 1H), 6.99–6.97 (m, 1H), 6.92 (d,  $J = 3.2$  Hz, 1H), 5.05 (d,  $J = 3.0$  Hz, 2H), 2.12 (t,  $J = 3.1$  Hz, 3H);  $^{13}\text{C}$  NMR (100 MHz,  $\text{CDCl}_3$ )  $\delta$  208.3, 142.1, 127.5, 124.6, 123.2, 96.3, 77.6, 17.8.

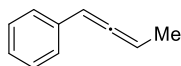

**buta-1,2-dien-1-ylbenzene (2w).** Colorless oil in 35% yield;  $^1\text{H NMR}$  (400 MHz,  $\text{CDCl}_3$ )  $\delta$  7.47 – 7.46 (m, 4H), 7.38 – 7.32 (m, 1H), 6.28 (dq,  $J = 6.4, 3.2$  Hz, 1H), 5.70 (p,  $J = 7.0$  Hz, 1H), 1.96 (dd,  $J = 7.1, 3.2$  Hz, 3H);  $^{13}\text{C NMR}$  (100 MHz,  $\text{CDCl}_3$ )  $\delta$  206.1, 135.2, 128.7, 126.8, 94.2, 89.7, 14.2.

## 10. Characterization data of products 3aa–3aw and 3ba–3la

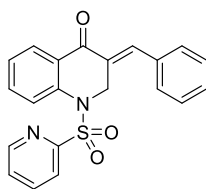

**(E)-3-benzylidene-1-(pyridin-2-ylsulfonyl)-2,3-dihydroquinolin-4(1H)-one (3aa).** Yellow solid, 163.7 mg, 87% yield, mp 151.3 – 152.6 °C;  $^1\text{H NMR}$  (400 MHz,  $\text{CDCl}_3$ )  $\delta$  8.37 (d,  $J = 4.0$  Hz, 1H), 7.96 (d,  $J = 7.7$  Hz, 1H), 7.76 (d,  $J = 8.2$  Hz, 1H), 7.64 – 7.56 (m, 2H), 7.50 (d,  $J = 6.3$  Hz, 2H), 7.45 – 7.39 (m, 3H), 7.37 – 7.32 (m, 2H), 7.29 (d,  $J = 7.3$  Hz, 2H), 5.10 (s, 2H);  $^{13}\text{C NMR}$  (100 MHz,  $\text{CDCl}_3$ )  $\delta$  183.0, 156.1, 150.0, 141.6, 138.0, 137.6, 134.2, 130.4, 130.0, 129.8, 128.9, 128.7, 128.3, 127.0, 126.9, 126.2, 122.8, 48.2; HRMS (ESI-TOF) Calcd. for  $\text{C}_{21}\text{H}_{17}\text{N}_2\text{O}_3\text{S}^+$   $[\text{M}+\text{H}]^+$ : 377.0954; found: 377.0960.

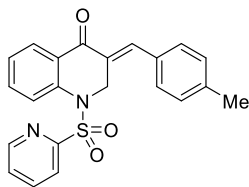

**(E)-3-(4-methylbenzylidene)-1-(pyridin-2-ylsulfonyl)-2,3-dihydroquinolin-4(1H)-one (3ab).** Yellow solid, 162.0 mg, 83% yield, mp 179.8 – 180.9 °C;  $^1\text{H NMR}$  (400 MHz,  $\text{CDCl}_3$ )  $\delta$  8.36 – 8.35 (m, 1H), 7.95 (dd,  $J = 7.8, 1.5$  Hz, 1H), 7.75 (dd,  $J = 8.2, 0.5$  Hz, 1H), 7.63 – 7.55 (m, 2H), 7.48 (d,  $J = 7.8$  Hz, 1H), 7.44 (s, 1H), 7.36 – 7.32 (m, 2H), 7.26 – 7.23 (m, 2H), 7.18 (d,  $J = 8.1$  Hz, 2H), 5.09 (d,  $J = 1.4$  Hz, 2H), 2.39 (s, 3H);  $^{13}\text{C NMR}$  (100 MHz,  $\text{CDCl}_3$ )  $\delta$  183.0, 156.1, 150.1, 141.6, 140.3, 137.9, 137.8, 137.7, 134.0, 131.3, 130.2, 129.7, 129.5, 128.8, 128.2, 126.9, 126.2, 122.7, 48.3, 21.5; HRMS (ESI-TOF) Calcd. for  $\text{C}_{22}\text{H}_{19}\text{N}_2\text{O}_3\text{S}^+$   $[\text{M}+\text{H}]^+$ : 391.1111; found: 391.1115.

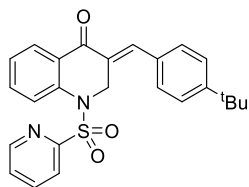

**(E)-3-(4-(tert-butyl)benzylidene)-1-(pyridin-2-ylsulfonyl)-2,3-dihydroquinolin-4(1H)-one**

**(3ac).** Yellow solid, 160.0 mg, 74% yield, mp 188.9 – 190.8 °C; <sup>1</sup>H NMR (400 MHz, CDCl<sub>3</sub>) δ 8.42 (dd, *J* = 4.6, 0.7 Hz, 1H), 7.99 (dd, *J* = 7.8, 1.5 Hz, 1H), 7.80 (d, *J* = 7.7 Hz, 1H), 7.67 (td, *J* = 7.8, 1.7 Hz, 1H), 7.64 – 7.60 (m, 1H), 7.56 – 7.49 (m, 4H), 7.41 – 7.36 (m, 2H), 7.31 (d, *J* = 8.3 Hz, 2H), 5.17 (d, *J* = 1.5 Hz, 2H), 1.39 (s, 9H); <sup>13</sup>C NMR (100 MHz, CDCl<sub>3</sub>) δ 183.1, 156.1, 153.4, 150.1, 141.6, 137.9, 137.8, 137.7, 134.1, 131.4, 130.1, 129.6, 129.0, 128.3, 127.0, 126.3, 126.0, 122.8, 48.4, 35.0, 31.3; HRMS (ESI-TOF) Calcd. for C<sub>25</sub>H<sub>25</sub>N<sub>2</sub>O<sub>3</sub>S<sup>+</sup> [M+H]<sup>+</sup>: 433.1580; found: 433.1586.

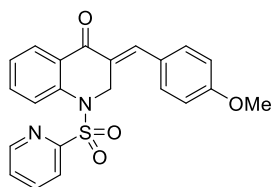

**(E)-3-(4-methoxybenzylidene)-1-(pyridin-2-ylsulfonyl)-2,3-dihydroquinolin-4(1H)-one (3ad).**

Yellow solid, 140.2 mg, 69% yield, mp 153.1 – 154.5 °C; <sup>1</sup>H NMR (400 MHz, CDCl<sub>3</sub>) δ 8.37 (dd, *J* = 4.6, 0.6 Hz, 1H), 7.96 (dd, *J* = 7.8, 1.5 Hz, 1H), 7.77 (d, *J* = 7.7 Hz, 1H), 7.64 – 7.57 (m, 2H), 7.51 (d, *J* = 7.8 Hz, 1H), 7.43 (s, 1H), 7.36 (ddd, *J* = 7.6, 4.1, 2.4 Hz, 2H), 7.28 (d, *J* = 8.7 Hz, 2H), 6.97 (d, *J* = 8.8 Hz, 2H), 5.11 (d, *J* = 1.4 Hz, 2H), 3.87 (s, 3H); <sup>13</sup>C NMR (100 MHz, CDCl<sub>3</sub>) δ 183.1, 161.0, 156.1, 150.2, 141.5, 137.9, 137.7, 134.1, 132.2, 129.0, 128.3, 128.2, 127.0, 126.9, 126.8, 126.3, 122.8, 114.6, 55.5, 48.3; HRMS (ESI-TOF) Calcd. for C<sub>22</sub>H<sub>19</sub>N<sub>2</sub>O<sub>4</sub>S<sup>+</sup> [M+H]<sup>+</sup>: 407.1060; found: 407.1058.

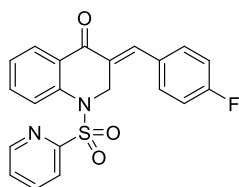

**(E)-3-(4-fluorobenzylidene)-1-(pyridin-2-ylsulfonyl)-2,3-dihydroquinolin-4(1H)-one (3ae).**

Yellow solid, 171.6 mg, 87% yield, mp 160.3 – 161.8 °C; <sup>1</sup>H NMR (400 MHz, CDCl<sub>3</sub>) δ 8.39 (dd, *J* = 4.6, 0.7 Hz, 1H), 7.96 (dd, *J* = 7.8, 1.5 Hz, 1H), 7.78 – 7.74 (m, 1H), 7.66 (td, *J* = 7.7, 1.7 Hz,

1H), 7.62 – 7.56 (m, 1H), 7.54 (d,  $J = 7.8$  Hz, 1H), 7.48 (s, 1H), 7.40 – 7.30 (m, 4H), 7.14 (t,  $J = 8.6$  Hz, 2H), 5.09 (d,  $J = 1.4$  Hz, 2H);  $^{13}\text{C}$  NMR (100 MHz,  $\text{CDCl}_3$ )  $\delta$  183.0, 163.4 (d,  $J = 251.9$  Hz, 1C), 156.2, 150.1, 141.6, 138.0, 136.4, 136.3, 134.3, 132.1 (d,  $J = 8.4$  Hz, 1C), 130.4 (d,  $J = 2.9$  Hz, 1C), 130.3, 128.7, 128.4, 127.1, 127.0, 126.1, 122.8, 116.3 (d,  $J = 21.8$  Hz, 1C), 48.3; HRMS (ESI-TOF) Calcd. for  $\text{C}_{21}\text{H}_{16}\text{FN}_2\text{O}_3\text{S}^+$   $[\text{M}+\text{H}]^+$ : 395.0860; found: 395.0868.

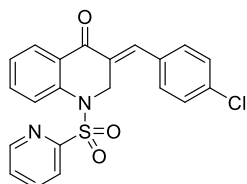

**(E)-3-(4-chlorobenzylidene)-1-(pyridin-2-ylsulfonyl)-2,3-dihydroquinolin-4(1H)-one (3af).**

Yellow solid, 154.1 mg, 75% yield, mp 177.6 – 178.9 °C;  $^1\text{H}$  NMR (400 MHz,  $\text{CDCl}_3$ )  $\delta$  8.44 (dd,  $J = 4.6, 0.7$  Hz, 1H), 8.01 (dd,  $J = 7.8, 1.5$  Hz, 1H), 7.82 – 7.80 (m, 1H), 7.71 (td,  $J = 7.7, 1.7$  Hz, 1H), 7.66 – 7.62 (m, 1H), 7.59 (d,  $J = 7.8$  Hz, 1H), 7.51 (s, 1H), 7.47 (d,  $J = 8.5$  Hz, 2H), 7.44 – 7.38 (m, 2H), 7.32 (d,  $J = 8.5$  Hz, 2H), 5.13 (d,  $J = 1.6$  Hz, 2H);  $^{13}\text{C}$  NMR (100 MHz,  $\text{CDCl}_3$ )  $\delta$  182.9, 156.2, 150.1, 150.0, 141.6, 138.0, 136.2, 136.1, 135.9, 134.3, 132.7, 131.3, 131.0, 129.3, 128.6, 128.4, 127.1, 127.0, 126.1, 122.8, 48.3; HRMS (ESI-TOF) Calcd. for  $\text{C}_{21}\text{H}_{16}\text{ClN}_2\text{O}_3\text{S}^+$   $[\text{M}+\text{H}]^+$ : 411.0565; found: 411.0566.

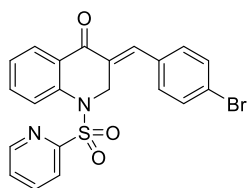

**(E)-3-(4-bromobenzylidene)-1-(pyridin-2-ylsulfonyl)-2,3-dihydroquinolin-4(1H)-one (3ag).**

Yellow solid, 216.3 mg, 95% yield, mp 167.7 – 169.8 °C;  $^1\text{H}$  NMR (400 MHz,  $\text{CDCl}_3$ )  $\delta$  8.38 (dd,  $J = 4.6, 0.7$  Hz, 1H), 7.95 (dd,  $J = 7.8, 1.4$  Hz, 1H), 7.75 (d,  $J = 8.2$  Hz, 1H), 7.66 (td,  $J = 7.8, 1.7$  Hz, 1H), 7.60 – 7.53 (m, 4H), 7.44 (s, 1H), 7.38 – 7.32 (m, 2H), 7.19 (d,  $J = 8.4$  Hz, 2H), 5.06 (d,  $J = 1.5$  Hz, 2H);  $^{13}\text{C}$  NMR (100 MHz,  $\text{CDCl}_3$ )  $\delta$  182.8, 156.1, 150.1, 141.6, 138.0, 136.1, 134.3, 133.1, 132.3, 131.4, 131.1, 128.6, 128.4, 127.1, 127.0, 126.1, 124.2, 122.8, 48.3; HRMS (ESI-TOF) Calcd. for  $\text{C}_{21}\text{H}_{16}\text{BrN}_2\text{O}_3\text{S}^+$   $[\text{M}+\text{H}]^+$ : 455.0060; found: 455.0050.



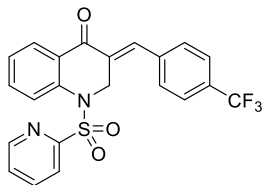

**(E)-1-(pyridin-2-ylsulfonyl)-3-(4-(trifluoromethyl)benzylidene)-2,3-dihydroquinolin-4(1H)-one (3ah).** Yellow solid, 186.7 mg, 84% yield, mp 171.4 – 172.8 °C; <sup>1</sup>H NMR (400 MHz, CDCl<sub>3</sub>) δ 8.41 – 8.39 (m, 1H), 7.96 (dd, *J* = 7.8, 1.5 Hz, 1H), 7.77 – 7.75 (m, 1H), 7.71 – 7.66 (m, 3H), 7.60 – 7.55 (m, 3H), 7.47 (d, *J* = 8.2 Hz, 2H), 7.38 (ddd, *J* = 7.6, 4.7, 1.0 Hz, 1H), 7.34 (td, *J* = 7.7, 1.0 Hz, 1H), 5.10 (d, *J* = 1.6 Hz, 2H); <sup>13</sup>C NMR (100 MHz, CDCl<sub>3</sub>) δ 182.7, 156.1, 150.1, 150.0, 141.6, 138.1, 137.8, 135.5, 135.4, 134.5, 132.5, 131.2 (q, *J* = 32.8 Hz, 1C), 130.0, 128.5, 128.4, 127.2, 127.0, 125.9, 123.86 (q, *J* = 272.4 Hz, 1C), 122.8, 48.3; HRMS (ESI-TOF) Calcd. for C<sub>22</sub>H<sub>16</sub>F<sub>3</sub>N<sub>2</sub>O<sub>3</sub>S<sup>+</sup> [M+H]<sup>+</sup>: 445.0828; found: 445.0827.

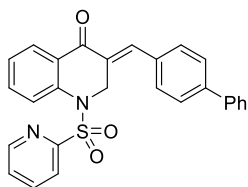

**(E)-3-([1,1'-biphenyl]-4-ylmethylene)-1-(pyridin-2-ylsulfonyl)-2,3-dihydroquinolin-4(1H)-one (3ai).** Yellow solid, 203.6 mg, 90% yield, mp 170.7 – 172.3 °C; <sup>1</sup>H NMR (400 MHz, CDCl<sub>3</sub>) δ 8.41 (dd, *J* = 4.6, 0.6 Hz, 1H), 7.99 (dd, *J* = 7.8, 1.5 Hz, 1H), 7.79 (d, *J* = 7.7 Hz, 1H), 7.70 – 7.59 (m, 6H), 7.56 – 7.54 (m, 2H), 7.48 (t, *J* = 7.5 Hz, 2H), 7.41 (d, *J* = 8.3 Hz, 3H), 7.38 – 7.36 (m, 2H), 5.17 (d, *J* = 1.5 Hz, 2H); <sup>13</sup>C NMR (100 MHz, CDCl<sub>3</sub>) δ 183.0, 156.1, 150.2, 142.6, 141.6, 140.0, 138.0, 137.3, 134.2, 133.1, 130.7, 130.3, 129.1, 128.8, 128.3, 128.1, 127.6, 127.2, 127.1, 126.3, 122.8, 48.4; HRMS (ESI-TOF) Calcd. for C<sub>27</sub>H<sub>21</sub>N<sub>2</sub>O<sub>3</sub>S<sup>+</sup> [M+H]<sup>+</sup>: 453.1267; found: 453.1285.

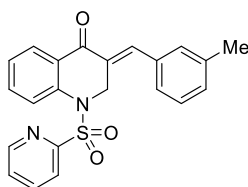

**(E)-3-(3-methylbenzylidene)-1-(pyridin-2-ylsulfonyl)-2,3-dihydroquinolin-4(1H)-one (3aj).** Yellow solid, 167.9 mg, 86% yield, mp 147.9 – 149.5 °C; <sup>1</sup>H NMR (400 MHz, CDCl<sub>3</sub>) δ 8.38 (d, *J* = 4.4 Hz, 1H), 7.96 (dd, *J* = 7.8, 1.5 Hz, 1H), 7.76 (d, *J* = 8.1 Hz, 1H), 7.65 – 7.56 (m, 2H), 7.51 (d,

$J = 7.8$  Hz, 1H), 7.46 (s, 1H), 7.37 – 7.30 (m, 3H), 7.21 (d,  $J = 7.6$  Hz, 1H), 7.09 (d,  $J = 8.6$  Hz, 2H), 5.09 (d,  $J = 1.5$  Hz, 2H), 2.39 (s, 3H);  $^{13}\text{C}$  NMR (100 MHz,  $\text{CDCl}_3$ )  $\delta$  183.0, 156.1, 150.1, 150.0, 141.6, 138.6, 137.9, 137.8, 134.1, 130.7, 130.6, 130.2, 128.8, 128.7, 128.2, 127.1, 127.0, 126.2, 122.8, 48.3, 21.5; HRMS (ESI-TOF) Calcd. for  $\text{C}_{22}\text{H}_{19}\text{N}_2\text{O}_3\text{S}^+$   $[\text{M}+\text{H}]^+$ : 391.1111; found: 391.1118.

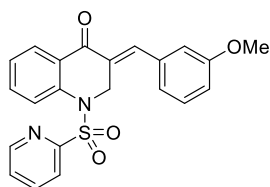

**(*E*)-3-(3-methoxybenzylidene)-1-(pyridin-2-ylsulfonyl)-2,3-dihydroquinolin-4(1*H*)-one (3ak).**

Yellow solid, 172.7 mg, 85% yield, mp 152.7 – 154.2 °C;  $^1\text{H}$  NMR (400 MHz,  $\text{CDCl}_3$ )  $\delta$  8.39 (dd,  $J = 4.6, 0.6$  Hz, 1H), 7.96 (dd,  $J = 7.8, 1.4$  Hz, 1H), 7.76 (d,  $J = 7.8$  Hz, 1H), 7.65 (td,  $J = 7.8, 1.7$  Hz, 1H), 7.60 – 7.56 (m, 1H), 7.53 (d,  $J = 7.8$  Hz, 1H), 7.47 (s, 1H), 7.36 (ddd,  $J = 13.6, 9.2, 4.3$  Hz, 3H), 6.96 – 6.93 (m, 1H), 6.88 (d,  $J = 7.7$  Hz, 2H), 5.10 (d,  $J = 1.4$  Hz, 2H), 3.84 (s, 3H);  $^{13}\text{C}$  NMR (100 MHz,  $\text{CDCl}_3$ )  $\delta$  183.0, 159.8, 156.1, 150.1, 141.7, 138.0, 137.6, 135.4, 134.2, 130.6, 130.0, 128.7, 128.3, 127.0, 126.9, 126.1, 122.8, 122.3, 115.4, 115.3, 55.4, 48.3; HRMS (ESI-TOF) Calcd. for  $\text{C}_{22}\text{H}_{19}\text{N}_2\text{O}_4\text{S}^+$   $[\text{M}+\text{H}]^+$ : 407.1060; found: 407.1064.

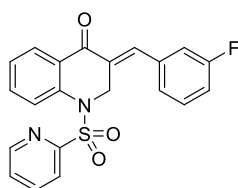

**(*E*)-3-(3-fluorobenzylidene)-1-(pyridin-2-ylsulfonyl)-2,3-dihydroquinolin-4(1*H*)-one (3al).**

Yellow solid, 171.6 mg, 87% yield, mp 162.7 – 164.3 °C;  $^1\text{H}$  NMR (400 MHz,  $\text{CDCl}_3$ )  $\delta$  8.39 (d,  $J = 4.0$  Hz, 1H), 7.95 (dd,  $J = 7.8, 1.4$  Hz, 1H), 7.76 (d,  $J = 7.9$  Hz, 1H), 7.67 (td,  $J = 7.8, 1.6$  Hz, 1H), 7.60 – 7.56 (m, 1H), 7.54 (d,  $J = 7.8$  Hz, 1H), 7.46 (s, 1H), 7.42 – 7.32 (m, 3H), 7.12 – 7.08 (m, 2H), 6.99 (d,  $J = 9.5$  Hz, 1H), 5.08 (d,  $J = 1.5$  Hz, 2H);  $^{13}\text{C}$  NMR (100 MHz,  $\text{CDCl}_3$ )  $\delta$  182.8, 162.75 (d,  $J = 247.5$  Hz, 1C), 156.1, 150.1, 141.6, 138.0, 136.3 (d,  $J = 7.7$  Hz, 1C), 136.0, 134.3, 131.6, 130.6 (d,  $J = 8.3$  Hz, 1C), 128.5, 128.3, 127.1, 127.0, 126.1, 125.6 (d,  $J = 2.7$  Hz, 1C), 122.8, 116.8 (d,  $J = 7.1$  Hz, 1C), 116.5 (d,  $J = 7.9$  Hz, 1C), 48.2; HRMS (ESI-TOF) Calcd. for  $\text{C}_{21}\text{H}_{16}\text{FN}_2\text{O}_3\text{S}^+$   $[\text{M}+\text{H}]^+$ : 395.0860; found: 395.0861.

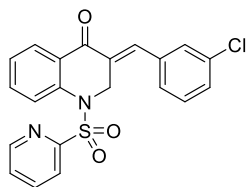

**(E)-3-(3-chlorobenzylidene)-1-(pyridin-2-ylsulfonyl)-2,3-dihydroquinolin-4(1H)-one (3am).**

Yellow solid, 186.9 mg, 91% yield, mp 176.5 – 177.8 °C; <sup>1</sup>H NMR (400 MHz, CDCl<sub>3</sub>) δ 8.41 (d, *J* = 4.4 Hz, 1H), 7.96 (dd, *J* = 7.8, 1.5 Hz, 1H), 7.77 (d, *J* = 8.1 Hz, 1H), 7.69 (td, *J* = 7.7, 1.6 Hz, 1H), 7.62 – 7.58 (m, 1H), 7.55 (d, *J* = 7.8 Hz, 1H), 7.45 (s, 1H), 7.41 – 7.34 (m, 4H), 7.25 (d, *J* = 6.2 Hz, 1H), 7.22 – 7.20 (m, 1H), 5.07 (d, *J* = 1.6 Hz, 2H); <sup>13</sup>C NMR (100 MHz, CDCl<sub>3</sub>) δ 182.8, 156.2, 150.2, 141.7, 138.0, 136.0, 135.8, 134.9, 134.4, 131.8, 130.3, 129.9, 129.7, 128.6, 128.4, 127.7, 127.1, 127.0, 126.2, 122.9, 48.3; HRMS (ESI-TOF) Calcd. for C<sub>21</sub>H<sub>16</sub>ClN<sub>2</sub>O<sub>3</sub>S<sup>+</sup> [M+H]<sup>+</sup>: 411.0565; found: 411.0565.

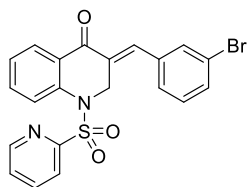

**(E)-3-(3-bromobenzylidene)-1-(pyridin-2-ylsulfonyl)-2,3-dihydroquinolin-4(1H)-one (3an).**

Yellow solid, 204.9 mg, 90% yield, mp 172.5 – 174.3 °C; <sup>1</sup>H NMR (400 MHz, CDCl<sub>3</sub>) δ 8.45 – 8.44 (m, 1H), 8.00 (dd, *J* = 7.8, 1.4 Hz, 1H), 7.80 (d, *J* = 8.1 Hz, 1H), 7.73 (td, *J* = 7.7, 1.6 Hz, 1H), 7.63 (td, *J* = 8.2, 1.5 Hz, 1H), 7.58 (t, *J* = 7.9 Hz, 2H), 7.47 (s, 1H), 7.43 (dd, *J* = 9.2, 3.1 Hz, 2H), 7.38 (dd, *J* = 16.7, 7.9 Hz, 2H), 7.29 (d, *J* = 8.1 Hz, 1H), 5.10 (d, *J* = 1.4 Hz, 2H); <sup>13</sup>C NMR (100 MHz, CDCl<sub>3</sub>) δ 182.7, 156.1, 150.1, 141.7, 138.0, 136.2, 135.7, 134.4, 132.8, 132.6, 131.8, 130.5, 128.5, 128.4, 128.0, 127.1, 127.0, 126.1, 123.0, 122.8, 48.2; HRMS (ESI-TOF) Calcd. for C<sub>21</sub>H<sub>16</sub>BrN<sub>2</sub>O<sub>3</sub>S<sup>+</sup> [M+H]<sup>+</sup>: 455.0060; found: 455.0063.

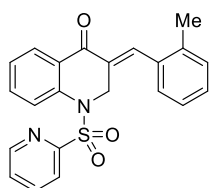

**(E)-3-(2-methylbenzylidene)-1-(pyridin-2-ylsulfonyl)-2,3-dihydroquinolin-4(1H)-one (3ao).**

Yellow solid, 167.9 mg, 86% yield, mp 141.1 – 142.5 °C; <sup>1</sup>H NMR (400 MHz, CDCl<sub>3</sub>) δ 8.48 (dd,

$J = 4.6, 0.7$  Hz, 1H), 8.03 (dd,  $J = 7.8, 1.5$  Hz, 1H), 7.83 – 7.81 (m, 1H), 7.78 (s, 1H), 7.74 (td,  $J = 7.7, 1.7$  Hz, 1H), 7.62 (dd,  $J = 10.6, 4.8$  Hz, 2H), 7.43 (ddd,  $J = 7.6, 4.7, 1.1$  Hz, 1H), 7.39 (td,  $J = 7.7, 1.0$  Hz, 1H), 7.37 – 7.33 (m, 1H), 7.32 – 7.29 (m, 2H), 7.25 (t,  $J = 7.3$  Hz, 1H), 5.07 (d,  $J = 1.6$  Hz, 2H), 2.25 (s, 3H);  $^{13}\text{C}$  NMR (100 MHz,  $\text{CDCl}_3$ )  $\delta$  183.1, 156.4, 150.0, 141.8, 138.0, 136.7, 134.2, 133.2, 130.7, 130.6, 129.8, 128.8, 128.7, 128.4, 127.1, 126.8, 126.2, 125.9, 122.8, 48.5, 20.1; HRMS (ESI-TOF) Calcd. for  $\text{C}_{22}\text{H}_{19}\text{N}_2\text{O}_3\text{S}^+ [\text{M}+\text{H}]^+$ : 391.1111; found: 391.1117.

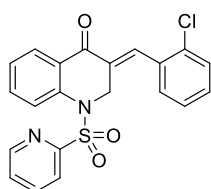

**(E)-3-(2-chlorobenzylidene)-1-(pyridin-2-ylsulfonyl)-2,3-dihydroquinolin-4(1H)-one (3ap).**

Yellow solid, 164.3 mg, 80% yield, mp 114.5 – 115.8 °C;  $^1\text{H}$  NMR (400 MHz,  $\text{CDCl}_3$ )  $\delta$  8.43 – 8.42 (m, 1H), 7.97 (dd,  $J = 7.8, 1.5$  Hz, 1H), 7.78 (d,  $J = 8.1$  Hz, 1H), 7.73 – 7.68 (m, 2H), 7.61 – 7.57 (m, 1H), 7.54 (d,  $J = 7.9$  Hz, 1H), 7.47 – 7.43 (m, 1H), 7.41 – 7.37 (m, 1H), 7.35 – 7.33 (m, 3H), 7.31 – 7.29 (m, 1H), 5.01 (d,  $J = 1.7$  Hz, 2H);  $^{13}\text{C}$  NMR (100 MHz,  $\text{CDCl}_3$ )  $\delta$  182.5, 155.9, 150.1, 141.7, 138.2, 135.0, 134.5, 134.4, 132.6, 131.8, 130.9, 130.2, 130.1, 128.6, 128.4, 127.3, 127.1, 127.0, 126.2, 122.7, 48.4; HRMS (ESI-TOF) Calcd. for  $\text{C}_{21}\text{H}_{16}\text{ClN}_2\text{O}_3\text{S}^+ [\text{M}+\text{H}]^+$ : 411.0565; found: 411.0567.

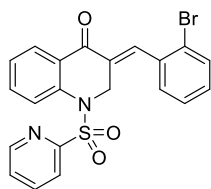

**(E)-3-(2-bromobenzylidene)-1-(pyridin-2-ylsulfonyl)-2,3-dihydroquinolin-4(1H)-one (3aq).**

Yellow solid, 193.5 mg, 85% yield, mp 142.1 – 143.7 °C;  $^1\text{H}$  NMR (400 MHz,  $\text{CDCl}_3$ )  $\delta$  8.44 (dd,  $J = 4.6, 0.7$  Hz, 1H), 7.97 (dd,  $J = 7.8, 1.5$  Hz, 1H), 7.78 (d,  $J = 8.2$  Hz, 1H), 7.72 (td,  $J = 7.8, 1.7$  Hz, 1H), 7.68 (s, 1H), 7.64 (dd,  $J = 8.0, 0.8$  Hz, 1H), 7.61 – 7.55 (m, 2H), 7.41 – 7.36 (m, 2H), 7.34 – 7.31 (m, 2H), 7.28 – 7.23 (m, 1H), 5.01 (d,  $J = 1.6$  Hz, 2H);  $^{13}\text{C}$  NMR (100 MHz,  $\text{CDCl}_3$ )  $\delta$  182.5, 155.8, 150.1, 141.6, 138.2, 136.6, 134.3, 133.4, 131.5, 130.9, 130.2, 128.6, 128.4, 127.7, 127.3,

127.0, 126.0, 125.7, 122.6, 48.4; HRMS (ESI-TOF) Calcd. for  $C_{21}H_{16}BrN_2O_3S^+$   $[M+H]^+$ : 455.0060; found: 455.0052.

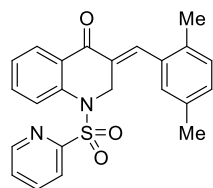

**(*E*)-3-(2,5-dimethylbenzylidene)-1-(pyridin-2-ylsulfonyl)-2,3-dihydroquinolin-4(1*H*)-one**

**(3ar).** Yellow solid, 178.0 mg, 88% yield, mp 117.3 – 118.7 °C;  $^1H$  NMR (400 MHz,  $CDCl_3$ )  $\delta$  8.42 (dd,  $J = 4.6, 0.7$  Hz, 1H), 7.99 (dd,  $J = 7.8, 1.4$  Hz, 1H), 7.79 – 7.77 (m, 1H), 7.72 – 7.67 (m, 2H), 7.61 – 7.55 (m, 2H), 7.38 (ddd,  $J = 7.7, 4.8, 1.1$  Hz, 1H), 7.34 (td,  $J = 7.8, 1.0$  Hz, 1H), 7.11 (s, 2H), 6.98 (s, 1H), 5.02 (d,  $J = 1.6$  Hz, 2H), 2.34 (s, 3H), 2.15 (s, 3H);  $^{13}C$  NMR (100 MHz,  $CDCl_3$ )  $\delta$  183.1, 156.4, 150.0, 149.9, 141.8, 137.9, 137.0, 136.9, 135.6, 134.8, 134.1, 133.0, 130.5, 129.2, 128.8, 128.4, 127.0, 126.8, 125.8, 122.7, 48.5, 21.1, 19.5; HRMS (ESI-TOF) Calcd. for  $C_{23}H_{21}N_2O_3S^+$   $[M+H]^+$ : 405.1267; found: 405.1273.

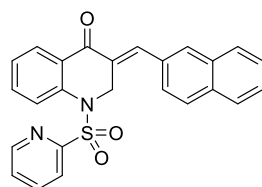

**(*E*)-3-(naphthalen-2-ylmethylene)-1-(pyridin-2-ylsulfonyl)-2,3-dihydroquinolin-4(1*H*)-one**

**(3as).** Yellow solid, 198.3 mg, 93% yield, mp 155.4 – 156.8 °C;  $^1H$  NMR (400 MHz,  $CDCl_3$ )  $\delta$  8.39 (d,  $J = 4.0$  Hz, 1H), 8.01 (dd,  $J = 7.8, 1.4$  Hz, 1H), 7.90 – 7.85 (m, 3H), 7.80 – 7.77 (m, 2H), 7.65 (s, 1H), 7.63 – 7.59 (m, 2H), 7.58 – 7.53 (m, 2H), 7.48 (d,  $J = 7.8$  Hz, 1H), 7.39 – 7.34 (m, 3H), 5.20 (d,  $J = 1.3$  Hz, 2H);  $^{13}C$  NMR (100 MHz,  $CDCl_3$ )  $\delta$  183.0, 156.2, 150.1, 141.7, 137.9, 137.7, 134.2, 133.6, 133.1, 131.7, 130.5, 130.4, 128.8, 128.7, 128.6, 128.3, 127.9, 127.6, 127.0, 126.9, 126.7, 126.2, 122.8, 48.4; HRMS (ESI-TOF) Calcd. for  $C_{25}H_{18}N_2O_3SNa^+$   $[M+Na]^+$ : 449.0930; found: 449.0931.

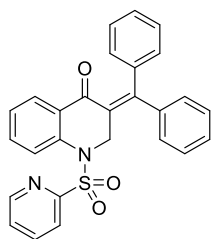

**3-(diphenylmethylene)-1-(pyridin-2-ylsulfonyl)-2,3-dihydroquinolin-4(1H)-one (3at).** Yellow solid, 210.4 mg, 93% yield, mp 158.1 – 160.4 °C; <sup>1</sup>H NMR (400 MHz, CDCl<sub>3</sub>) δ 8.64 – 8.63 (m, 1H), 7.92 (dd, *J* = 7.9, 1.5 Hz, 1H), 7.85 – 7.80 (m, 2H), 7.71 (d, *J* = 7.8 Hz, 1H), 7.56 – 7.52 (m, 1H), 7.49 (ddd, *J* = 7.6, 4.7, 1.0 Hz, 1H), 7.41 – 7.40 (m, 3H), 7.29 – 7.20 (m, 4H), 7.02 (dd, *J* = 6.6, 3.0 Hz, 2H), 6.71 – 6.69 (m, 2H), 4.98 (s, 2H); <sup>13</sup>C NMR (100 MHz, CDCl<sub>3</sub>) δ 184.5, 157.1, 154.8, 150.3, 141.6, 141.4, 140.1, 138.2, 134.3, 129.6, 129.4, 129.1, 128.7, 128.5, 128.3, 128.0, 127.9, 127.1, 126.7, 126.1, 124.3, 123.0, 52.1; HRMS (ESI-TOF) Calcd. for C<sub>27</sub>H<sub>21</sub>N<sub>2</sub>O<sub>3</sub>S<sup>+</sup> [M+H]<sup>+</sup>: 453.1267; found: 453.1277.

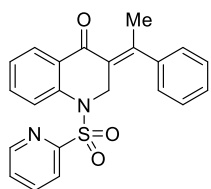

**(E)-3-(1-phenylethylidene)-1-(pyridin-2-ylsulfonyl)-2,3-dihydroquinolin-4(1H)-one (3au).** Yellow solid, 165.9 mg, 85% yield, mp 128.5 – 130.1 °C; <sup>1</sup>H NMR (400 MHz, CDCl<sub>3</sub>) δ 8.57 (s, 1H), 8.07 – 8.04 (m, 1H), 7.90 – 7.86 (m, 1H), 7.77 – 7.70 (m, 2H), 7.57 – 7.56 (m, 1H), 7.49 – 7.42 (m, 4H), 7.37 – 7.34 (m, 1H), 7.16 (d, *J* = 6.2 Hz, 2H), 4.74 (d, *J* = 1.2 Hz, 2H), 2.44 (s, 3H); <sup>13</sup>C NMR (100 MHz, CDCl<sub>3</sub>) δ 185.3, 156.7, 154.7, 149.9, 141.9, 141.5, 137.8, 133.7, 129.3, 128.6, 128.5, 128.3, 127.1, 126.9, 126.2, 125.8, 124.6, 122.9, 51.4, 24.1; HRMS (ESI-TOF) Calcd. for C<sub>22</sub>H<sub>19</sub>N<sub>2</sub>O<sub>3</sub>S<sup>+</sup> [M+H]<sup>+</sup>: 391.1111; found: 391.1113.

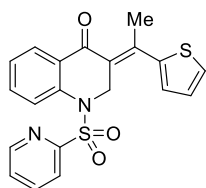

**(E)-1-(pyridin-2-ylsulfonyl)-3-(1-(thiophen-2-yl)ethylidene)-2,3-dihydroquinolin-4(1H)-one (3av).** Yellow solid, 144.7 mg, 73% yield, mp 136.8 – 138.3 °C; <sup>1</sup>H NMR (400 MHz, CDCl<sub>3</sub>) δ 8.48

(dd,  $J = 4.6, 0.7$  Hz, 1H), 7.98 (dd,  $J = 7.8, 1.5$  Hz, 1H), 7.83 (td,  $J = 7.8, 1.7$  Hz, 1H), 7.75 – 7.73 (m, 1H), 7.65 (d,  $J = 7.8$  Hz, 1H), 7.56 (td,  $J = 7.8, 1.6$  Hz, 1H), 7.50 (dd,  $J = 5.1, 1.0$  Hz, 1H), 7.42 (ddd,  $J = 7.6, 4.7, 1.0$  Hz, 1H), 7.36 – 7.32 (m, 1H), 7.10 (dd,  $J = 5.1, 3.7$  Hz, 1H), 6.97 (dd,  $J = 3.6, 1.0$  Hz, 1H), 5.00 (d,  $J = 1.0$  Hz, 2H), 2.30 (s, 3H);  $^{13}\text{C}$  NMR (100 MHz,  $\text{CDCl}_3$ )  $\delta$  185.2, 157.0, 150.1, 146.6, 143.7, 141.5, 138.0, 134.0, 129.6, 129.4, 128.9, 128.4, 127.7, 126.9, 126.7, 126.0, 125.4, 123.0, 51.9, 25.3; HRMS (ESI-TOF) Calcd. for  $\text{C}_{20}\text{H}_{17}\text{N}_2\text{O}_3\text{S}_2^+$   $[\text{M}+\text{H}]^+$ : 397.0675; found: 397.0676.

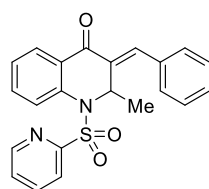

**(*E*)-3-benzylidene-2-methyl-1-(pyridin-2-ylsulfonyl)-2,3-dihydroquinolin-4(1*H*)-one (3aw).**

Yellow solid, 160.1 mg, 82% yield, mp 167.1 – 168.8 °C;  $^1\text{H}$  NMR (400 MHz,  $\text{CDCl}_3$ )  $\delta$  8.33 – 8.32 (m, 1H), 7.99 (dd,  $J = 7.8, 1.5$  Hz, 1H), 7.79 (d,  $J = 8.1$  Hz, 1H), 7.61 (td,  $J = 7.9, 1.5$  Hz, 1H), 7.54 (td,  $J = 7.7, 1.7$  Hz, 1H), 7.44 (d,  $J = 7.6$  Hz, 3H), 7.37 – 7.29 (m, 6H), 5.88 (q,  $J = 6.9$  Hz, 1H), 1.50 (d,  $J = 7.0$  Hz, 3H);  $^{13}\text{C}$  NMR (100 MHz,  $\text{CDCl}_3$ )  $\delta$  182.9, 156.0, 150.0, 139.3, 137.8, 136.7, 135.0, 134.5, 134.0, 129.9, 129.8, 129.0, 128.0, 127.8, 127.5, 126.9, 126.8, 122.7, 53.0, 21.0; HRMS (ESI-TOF) Calcd. for  $\text{C}_{22}\text{H}_{19}\text{N}_2\text{O}_3\text{S}^+$   $[\text{M}+\text{H}]^+$ : 391.1111; found: 391.1116.

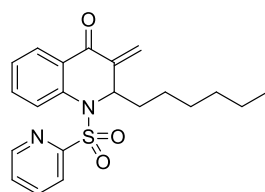

**2-hexyl-3-methylene-1-(pyridin-2-ylsulfonyl)-2,3-dihydroquinolin-4(1*H*)-one (3ax).**

Yellow oil in 74% yield;  $^1\text{H}$  NMR (400 MHz,  $\text{CDCl}_3$ )  $\delta$  8.46 (dd,  $J = 4.6, 0.6$  Hz, 1H), 7.92 (dd,  $J = 7.8, 1.5$  Hz, 1H), 7.80 (d,  $J = 8.1$  Hz, 1H), 7.74 (td,  $J = 7.7, 1.7$  Hz, 1H), 7.66 (d,  $J = 7.8$  Hz, 1H), 7.63 – 7.58 (m, 1H), 7.38 – 7.32 (m, 2H), 5.98 (s, 1H), 5.21 (s, 1H), 5.11 – 5.07 (m, 1H), 1.74 – 1.66 (m, 1H), 1.47 – 1.35 (m, 3H), 1.29 – 1.21 (m, 6H), 0.84 (t,  $J = 6.9$  Hz, 3H);  $^{13}\text{C}$  NMR (101 MHz,  $\text{CDCl}_3$ )  $\delta$  182.4, 156.3, 150.1,

142.2, 139.8, 138.0, 134.6, 128.1, 128.0, 127.8, 127.1, 127.0, 123.3, 123.1, 61.8, 35.1, 31.7, 28.6, 25.9, 22.6, 14.1.

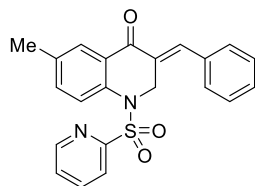

**(E)-3-benzylidene-6-methyl-1-(pyridin-2-ylsulfonyl)-2,3-dihydroquinolin-4(1H)-one (3ba).**

Yellow solid, 165.9 mg, 85% yield, mp 153.2 – 154.8 °C; <sup>1</sup>H NMR (400 MHz, CDCl<sub>3</sub>) δ 8.42 (d, *J* = 4.5 Hz, 1H), 7.79 (s, 1H), 7.70 – 7.65 (m, 2H), 7.52 (d, *J* = 7.9 Hz, 2H), 7.46 (dd, *J* = 10.1, 7.7 Hz, 4H), 7.40 (dd, *J* = 7.6, 4.7 Hz, 1H), 7.32 (d, *J* = 7.5 Hz, 2H), 5.11 (s, 2H), 2.42 (s, 3H); <sup>13</sup>C NMR (100 MHz, CDCl<sub>3</sub>) δ 183.1, 156.1, 150.0, 139.2, 137.9, 137.5, 137.1, 135.1, 134.2, 130.5, 130.0, 129.8, 128.9, 128.5, 128.3, 126.9, 126.2, 122.8, 48.2, 21.0; HRMS (ESI-TOF) Calcd. for C<sub>22</sub>H<sub>19</sub>N<sub>2</sub>O<sub>3</sub>S<sup>+</sup> [M+H]<sup>+</sup>: 391.1111; found: 391.1117

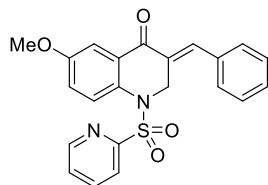

**(E)-3-benzylidene-6-methoxy-1-(pyridin-2-ylsulfonyl)-2,3-dihydroquinolin-4(1H)-one (3ca).**

Yellow solid, 162.6 mg, 80% yield, mp 131.7 – 133.3 °C; <sup>1</sup>H NMR (400 MHz, CDCl<sub>3</sub>) δ 8.39 (d, *J* = 4.0 Hz, 1H), 7.69 (d, *J* = 8.9 Hz, 1H), 7.62 (td, *J* = 7.8, 1.6 Hz, 1H), 7.47 – 7.45 (m, 3H), 7.43 – 7.40 (m, 3H), 7.38 – 7.35 (m, 1H), 7.29 (d, *J* = 6.6 Hz, 2H), 7.16 (dd, *J* = 8.9, 3.1 Hz, 1H), 5.07 (d, *J* = 1.4 Hz, 2H), 3.85 (s, 3H); <sup>13</sup>C NMR (100 MHz, CDCl<sub>3</sub>) δ 182.9, 158.6, 156.0, 150.1, 137.9, 137.8, 134.9, 134.2, 130.4, 130.1, 130.0, 129.9, 129.0, 128.2, 126.9, 123.0, 121.8, 110.6, 55.8, 48.3; HRMS (ESI-TOF) Calcd. for C<sub>22</sub>H<sub>19</sub>N<sub>2</sub>O<sub>4</sub>S<sup>+</sup> [M+H]<sup>+</sup>: 407.1060; found: 407.1065.

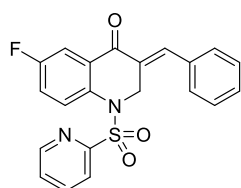

**(E)-3-benzylidene-6-fluoro-1-(pyridin-2-ylsulfonyl)-2,3-dihydroquinolin-4(1H)-one (3da).**

Yellow solid, 177.5 mg, 90% yield, mp 153.3 – 154.5 °C; <sup>1</sup>H NMR (400 MHz, CDCl<sub>3</sub>) δ 8.42 (d, *J*



= 4.6 Hz, 1H), 7.82 (dd,  $J = 8.9, 4.6$  Hz, 1H), 7.71 – 7.65 (m, 2H), 7.55 – 7.52 (m, 2H), 7.49 – 7.46 (m, 3H), 7.42 (dd,  $J = 7.6, 4.7$  Hz, 1H), 7.36 – 7.31 (m, 3H), 5.12 (s, 2H);  $^{13}\text{C}$  NMR (100 MHz,  $\text{CDCl}_3$ )  $\delta$  182.1, 161.2 (d,  $J = 248.6$  Hz, 1C), 156.0, 150.1, 138.3, 138.1, 137.8 (d,  $J = 2.3$  Hz, 1C), 134.0, 130.5 (d,  $J = 7.1$  Hz, 1C), 130.1, 130.0, 129.8, 129.0, 128.6 (d,  $J = 7.7$  Hz, 1C), 127.1, 122.9, 121.4 (d,  $J = 23.4$  Hz, 1C), 114.2 (d,  $J = 23.6$  Hz, 1C), 48.2; HRMS (ESI-TOF) Calcd. for  $\text{C}_{21}\text{H}_{16}\text{FN}_2\text{O}_3\text{S}^+ [\text{M}+\text{H}]^+$ : 395.0860; found: 395.0865.

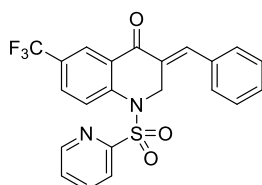

**(E)-3-benzylidene-1-(pyridin-2-ylsulfonyl)-6-(trifluoromethyl)-2,3-dihydroquinolin-4(1H)-one (3ea).** Yellow solid, 202.2 mg, 91% yield, mp 164.5 – 166.2 °C;  $^1\text{H}$  NMR (400 MHz,  $\text{CDCl}_3$ )  $\delta$  8.40 – 8.39 (m, 1H), 8.27 (d,  $J = 1.5$  Hz, 1H), 7.92 (d,  $J = 8.6$  Hz, 1H), 7.80 (dd,  $J = 8.6, 2.0$  Hz, 1H), 7.68 (td,  $J = 7.7, 1.6$  Hz, 1H), 7.59 (d,  $J = 7.8$  Hz, 1H), 7.55 (s, 1H), 7.44 (d,  $J = 7.2$  Hz, 3H), 7.42 – 7.38 (m, 1H), 7.29 – 7.27 (m, 2H), 5.13 (d,  $J = 1.4$  Hz, 2H);  $^{13}\text{C}$  NMR (100 MHz,  $\text{CDCl}_3$ )  $\delta$  182.1, 156.2, 150.2, 144.6, 138.7, 138.3, 133.8, 130.5 (q,  $J = 3.1$  Hz, 1C), 130.2, 130.1, 129.5, 129.1, 128.8 (q,  $J = 33.7$  Hz, 1C), 128.4, 127.3, 126.3, 125.8 (q,  $J = 3.7$  Hz, 1C), 123.6 (q,  $J = 272.5$  Hz, 1C), 122.8, 48.1; HRMS (ESI-TOF) Calcd. for  $\text{C}_{22}\text{H}_{16}\text{F}_3\text{N}_2\text{O}_3\text{S}^+ [\text{M}+\text{H}]^+$ : 445.0828; found: 445.0830.

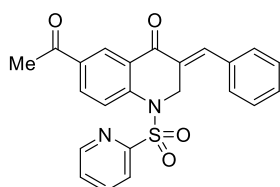

**(E)-6-acetyl-3-benzylidene-1-(pyridin-2-ylsulfonyl)-2,3-dihydroquinolin-4(1H)-one (3fa).** Yellow solid, 194.6 mg, 93% yield, mp 193.3 – 194.7 °C;  $^1\text{H}$  NMR (400 MHz,  $\text{CDCl}_3$ )  $\delta$  8.55 (d,  $J = 2.1$  Hz, 1H), 8.40 (d,  $J = 4.0$  Hz, 1H), 8.16 (dd,  $J = 8.6, 2.2$  Hz, 1H), 7.87 (d,  $J = 8.6$  Hz, 1H), 7.68 (td,  $J = 7.7, 1.6$  Hz, 1H), 7.61 (d,  $J = 7.8$  Hz, 1H), 7.58 (s, 1H), 7.45 (d,  $J = 7.6$  Hz, 3H), 7.43 – 7.37 (m, 1H), 7.32 – 7.29 (m, 2H), 5.14 (d,  $J = 1.4$  Hz, 2H), 2.64 (s, 3H);  $^{13}\text{C}$  NMR (100 MHz,  $\text{CDCl}_3$ )  $\delta$  196.5, 182.6, 156.3, 150.2, 145.6, 138.5, 138.2, 135.0, 134.0, 133.3, 130.1, 129.7, 129.1, 129.0,

127.9, 127.3, 125.7, 122.8, 48.2, 26.8; HRMS (ESI-TOF) Calcd. for  $C_{23}H_{19}N_2O_4S^+$   $[M+H]^+$ : 419.1060; found: 419.1069.

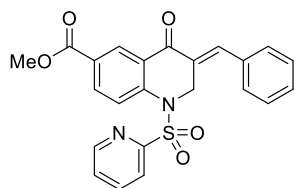

**methyl (E)-3-benzylidene-4-oxo-1-(pyridin-2-ylsulfonyl)-1,2,3,4-tetrahydroquinoline-6-carboxylate (3ga).** Yellow solid, 178.1 mg, 82% yield, mp 147.7 – 149.5 °C;  $^1H$  NMR (400 MHz,  $CDCl_3$ )  $\delta$  8.65 (d,  $J = 2.0$  Hz, 1H), 8.39 (dd,  $J = 4.6, 0.6$  Hz, 1H), 8.21 (dd,  $J = 8.6, 2.1$  Hz, 1H), 7.85 (d,  $J = 8.6$  Hz, 1H), 7.67 (td,  $J = 7.7, 1.7$  Hz, 1H), 7.60 – 7.57 (m, 2H), 7.48 – 7.42 (m, 3H), 7.39 (ddd,  $J = 7.5, 4.7, 1.1$  Hz, 1H), 7.33 – 7.28 (m, 2H), 5.14 (d,  $J = 1.4$  Hz, 2H), 3.93 (s, 3H);  $^{13}C$  NMR (100 MHz,  $CDCl_3$ )  $\delta$  182.5, 165.9, 156.2, 150.2, 145.4, 138.4, 138.2, 134.8, 134.0, 130.1, 130.0, 129.7, 129.1, 128.4, 128.0, 127.2, 125.6, 122.8, 52.5, 48.2; HRMS (ESI-TOF) Calcd. for  $C_{23}H_{19}N_2O_5S^+$   $[M+H]^+$ : 435.1009; found: 435.1011.

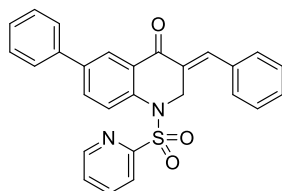

**(E)-3-benzylidene-6-phenyl-1-(pyridin-2-ylsulfonyl)-2,3-dihydroquinolin-4(1H)-one (3ha).** Yellow solid, 196.8 mg, 87% yield, mp 145.8 – 147.2 °C;  $^1H$  NMR (400 MHz,  $CDCl_3$ )  $\delta$  8.40 (d,  $J = 4.1$  Hz, 1H), 8.22 (d,  $J = 1.8$  Hz, 1H), 7.87 – 7.81 (m, 2H), 7.66 – 7.61 (m, 3H), 7.55 (d,  $J = 8.6$  Hz, 2H), 7.47 – 7.41 (m, 5H), 7.39 – 7.35 (m, 2H), 7.30 (d,  $J = 6.7$  Hz, 2H), 5.13 (d,  $J = 1.1$  Hz, 2H);  $^{13}C$  NMR (100 MHz,  $CDCl_3$ )  $\delta$  183.0, 156.1, 150.1, 140.7, 139.8, 139.2, 138.0, 137.8, 134.1, 132.6, 130.3, 130.0, 129.8, 129.0, 128.9, 128.8, 128.0, 127.0, 126.6, 126.5, 122.8, 48.2; HRMS (ESI-TOF) Calcd. for  $C_{27}H_{20}N_2O_3SNa^+$   $[M+Na]^+$ : 475.1087; found: 475.1091.

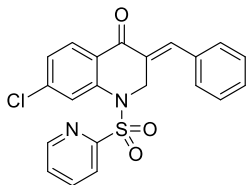

**(E)-3-benzylidene-7-chloro-1-(pyridin-2-ylsulfonyl)-2,3-dihydroquinolin-4(1H)-one (3ia).**

Yellow solid, 180.8 mg, 88% yield, mp 186.4 – 187.6 °C; <sup>1</sup>H NMR (400 MHz, CDCl<sub>3</sub>) δ 8.39 (d, *J* = 4.1 Hz, 1H), 7.91 (d, *J* = 8.4 Hz, 1H), 7.79 (d, *J* = 1.9 Hz, 1H), 7.65 (td, *J* = 7.7, 1.6 Hz, 1H), 7.54 (d, *J* = 7.8 Hz, 1H), 7.49 (s, 1H), 7.46 – 7.42 (m, 3H), 7.40 – 7.36 (m, 1H), 7.31 (dd, *J* = 8.4, 1.9 Hz, 1H), 7.27 – 7.25 (m, 2H), 5.07 (d, *J* = 1.4 Hz, 2H); <sup>13</sup>C NMR (100 MHz, CDCl<sub>3</sub>) δ 182.2, 156.1, 150.2, 142.6, 140.3, 138.1, 138.0, 134.0, 130.0, 129.9, 129.8, 129.5, 129.0, 127.3, 127.2, 126.9, 126.0, 122.8, 48.2; HRMS (ESI-TOF) Calcd. for C<sub>21</sub>H<sub>16</sub>ClN<sub>2</sub>O<sub>3</sub>S<sup>+</sup> [M+H]<sup>+</sup>: 411.0565; found: 411.0571.

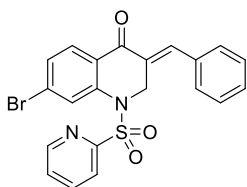

**(E)-3-benzylidene-7-bromo-1-(pyridin-2-ylsulfonyl)-2,3-dihydroquinolin-4(1H)-one (3ja).**

Yellow solid, 211.7 mg, 93% yield, mp 183.1 – 184.4 °C; <sup>1</sup>H NMR (400 MHz, CDCl<sub>3</sub>) δ 8.43 (dd, *J* = 4.6, 0.7 Hz, 1H), 8.00 (d, *J* = 1.7 Hz, 1H), 7.87 (d, *J* = 8.4 Hz, 1H), 7.69 (td, *J* = 7.7, 1.7 Hz, 1H), 7.58 (d, *J* = 7.8 Hz, 1H), 7.53 – 7.51 (m, 2H), 7.48 – 7.46 (m, 2H), 7.45 – 7.41 (m, 2H), 7.31 – 7.29 (m, 2H), 5.11 (d, *J* = 1.4 Hz, 2H); <sup>13</sup>C NMR (100 MHz, CDCl<sub>3</sub>) δ 182.3, 156.0, 150.2, 142.5, 138.1, 138.0, 133.9, 130.3, 130.0, 129.9, 129.8, 129.5, 129.0, 128.9, 127.3, 127.2, 122.8, 48.2; HRMS (ESI-TOF) Calcd. for C<sub>21</sub>H<sub>16</sub>BrN<sub>2</sub>O<sub>3</sub>S<sup>+</sup> [M+H]<sup>+</sup>: 455.0060; found: 455.0063.

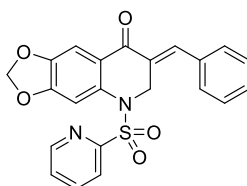

**(E)-7-benzylidene-5-(pyridin-2-ylsulfonyl)-6,7-dihydro-[1,3]dioxolo[4,5-g]quinolin-8(5H)-one (3ka).**

Yellow solid, 172.4 mg, 82% yield, mp 144.3 – 145.7 °C; <sup>1</sup>H NMR (400 MHz, CDCl<sub>3</sub>) δ 8.37 (d, *J* = 4.3 Hz, 1H), 7.62 (td, *J* = 7.7, 1.6 Hz, 1H), 7.46 – 7.35 (m, 6H), 7.31 (s, 1H), 7.24 – 7.21 (m,

3H), 6.04 (s, 2H), 5.01 (d,  $J = 1.2$  Hz, 2H);  $^{13}\text{C}$  NMR (100 MHz,  $\text{CDCl}_3$ )  $\delta$  181.5, 155.6, 152.5, 150.1, 147.1, 138.3, 137.9, 137.2, 134.2, 129.9, 129.7, 128.9, 127.0, 123.7, 122.9, 107.2, 106.3, 102.5, 48.3; HRMS (ESI-TOF) Calcd. for  $\text{C}_{22}\text{H}_{17}\text{N}_2\text{O}_5\text{S}^+ [\text{M}+\text{H}]^+$ : 421.0853; found: 421.0858.

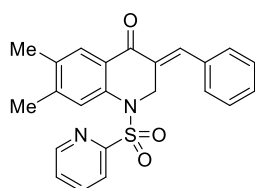

**(*E*)-3-benzylidene-6,7-dimethyl-1-(pyridin-2-ylsulfonyl)-2,3-dihydroquinolin-4(1*H*)-one (31a).**

Yellow solid, 165.8 mg, 82% yield, mp 160.8 – 161.5 °C;  $^1\text{H}$  NMR (400 MHz,  $\text{CDCl}_3$ )  $\delta$  8.42 (d,  $J = 4.5$  Hz, 1H), 7.76 (s, 1H), 7.66 (td,  $J = 7.7, 1.5$  Hz, 1H), 7.58 (s, 1H), 7.53 (s, 1H), 7.50 – 7.44 (m, 4H), 7.40 (dd,  $J = 7.6, 4.7$  Hz, 1H), 7.31 – 7.30 (m, 2H), 5.08 (d,  $J = 1.1$  Hz, 2H), 2.40 (s, 3H), 2.33 (s, 3H);  $^{13}\text{C}$  NMR (100 MHz,  $\text{CDCl}_3$ )  $\delta$  182.9, 156.1, 150.1, 144.5, 139.5, 137.9, 137.2, 136.2, 134.3, 130.5, 130.0, 129.7, 128.9, 128.8, 127.3, 126.9, 126.6, 122.9, 48.3, 20.7, 19.4; HRMS (ESI-TOF) Calcd. for  $\text{C}_{23}\text{H}_{21}\text{N}_2\text{O}_3\text{S}^+ [\text{M}+\text{H}]^+$ : 405.1267; found: 405.1270.

## 11. Characterization data of compounds 4-6, 7, 12, 17 and 18

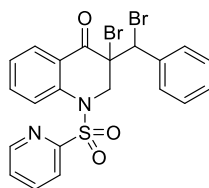

**3-bromo-3-(bromo(phenyl)methyl)-1-(pyridin-2-ylsulfonyl)-2,3-dihydroquinolin-4(1*H*)-one (4).** Yellow oil, 241.3 mg, 90% yield;  $^1\text{H}$  NMR (400 MHz,  $\text{CDCl}_3$ )  $\delta$  8.71 (d,  $J = 4.4$  Hz, 1H), 8.18 (dd,  $J = 7.9, 1.4$  Hz, 1H), 8.13 (d,  $J = 7.9$  Hz, 1H), 8.00 (td,  $J = 7.8, 1.5$  Hz, 1H), 7.61 – 7.54 (m, 3H), 7.52 (d,  $J = 8.2$  Hz, 1H), 7.47 (dd,  $J = 7.1, 1.5$  Hz, 1H), 7.41 (ddd,  $J = 8.8, 6.4, 2.3$  Hz, 3H), 7.21 (t,  $J = 7.2$  Hz, 1H), 6.12 (s, 1H), 5.00 (q,  $J = 14.3$  Hz, 2H);  $^{13}\text{C}$  NMR (100 MHz,  $\text{CDCl}_3$ )  $\delta$  185.2, 157.8, 150.5, 142.0, 138.6, 135.6, 135.4, 130.6, 130.2, 129.5, 128.6, 127.6, 124.5, 122.5, 121.5, 119.6, 65.5, 54.4, 52.4; HRMS (ESI-TOF) Calcd. for  $\text{C}_{21}\text{H}_{17}\text{Br}_2\text{N}_2\text{O}_3\text{S}^+ [\text{M}+\text{H}]^+$ : 534.9321; found: 534.9321.

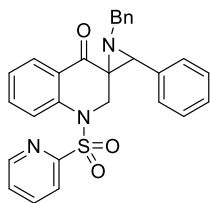

**1-benzyl-3-phenyl-1'-(pyridin-2-ylsulfonyl)-1',2'-dihydro-4'H-spiro[aziridine-2,3'-quinolin]-4'-one (5).** Yellow solid, 108.4 mg, 75% yield, mp 125.8 – 127.2 °C; <sup>1</sup>H NMR (400 MHz, CDCl<sub>3</sub>) δ 8.52 (d, *J* = 4.1 Hz, 1H), 8.01 (dd, *J* = 12.0, 4.6 Hz, 2H), 7.83 (td, *J* = 7.8, 1.6 Hz, 1H), 7.77 (d, *J* = 8.3 Hz, 1H), 7.53 – 7.48 (m, 1H), 7.41 – 7.39 (m, 1H), 7.37 – 7.35 (m, 6H), 7.31 (dd, *J* = 10.6, 3.9 Hz, 2H), 7.28 – 7.26 (m, 2H), 7.21 (dd, *J* = 15.0, 7.8 Hz, 1H), 4.19 (d, *J* = 14.7 Hz, 1H), 4.03 (d, *J* = 13.8 Hz, 1H), 3.94 (s, 1H), 3.86 (d, *J* = 14.7 Hz, 1H), 3.49 (d, *J* = 13.8 Hz, 1H); <sup>13</sup>C NMR (100 MHz, CDCl<sub>3</sub>) δ 189.6, 157.6, 149.9, 142.7, 138.8, 138.3, 135.1, 134.7, 128.5, 128.4, 128.3, 128.0, 127.9, 127.8, 127.4, 127.1, 127.0, 125.1, 122.8, 122.6, 54.9, 53.8, 51.3, 50.3; HRMS (ESI-TOF) Calcd. for C<sub>28</sub>H<sub>24</sub>N<sub>3</sub>O<sub>3</sub>S<sup>+</sup> [M+H]<sup>+</sup>: 482.1533; found: 482.1536.

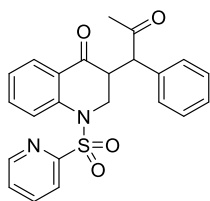

**3-(2-oxo-1-phenylpropyl)-1-(pyridin-2-ylsulfonyl)-2,3-dihydroquinolin-4(1H)-one (6).** Yellow solid, 109.7 mg, 87% yield, mp 139.2 – 140.8 °C; <sup>1</sup>H NMR (400 MHz, CDCl<sub>3</sub>) δ 8.66 (d, *J* = 4.3 Hz, 1H), 7.90 (t, *J* = 6.6 Hz, 1H), 7.86 (ddd, *J* = 15.5, 7.9, 1.6 Hz, 2H), 7.78 (d, *J* = 8.4 Hz, 1H), 7.45 (ddd, *J* = 7.5, 4.7, 1.1 Hz, 1H), 7.43 – 7.39 (m, 1H), 7.35 – 7.28 (m, 3H), 7.22 (d, *J* = 7.1 Hz, 2H), 7.13 – 7.09 (m, 1H), 4.24 (dd, *J* = 13.7, 4.8 Hz, 1H), 4.15 (ddd, *J* = 14.3, 9.7, 4.8 Hz, 1H), 3.90 (d, *J* = 9.7 Hz, 1H), 3.47 (t, *J* = 13.9 Hz, 1H), 2.24 (s, 3H); <sup>13</sup>C NMR (100 MHz, CDCl<sub>3</sub>) δ 205.8, 194.8, 156.7, 150.6, 142.4, 138.2, 134.8, 134.2, 129.4, 128.9, 128.3, 128.1, 127.5, 124.9, 124.4, 123.3, 122.3, 56.6, 50.0, 48.0, 29.3; HRMS (ESI-TOF) Calcd. for C<sub>23</sub>H<sub>21</sub>N<sub>2</sub>O<sub>4</sub>S<sup>+</sup> [M+H]<sup>+</sup>: 421.1217; found: 421.1222.

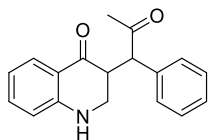

**3-(2-oxo-1-phenylpropyl)-2,3-dihydroquinolin-4(1H)-one (7).** Yellow solid, 21.8 mg, 78% yield, mp 126.9–128.3 °C; <sup>1</sup>H NMR (400 MHz, CDCl<sub>3</sub>) δ 7.83 (dd, *J* = 8.0, 1.3 Hz, 1H), 7.41–7.30 (m, 6H), 6.76 (t, *J* = 7.5 Hz, 1H), 6.65 (d, *J* = 8.2 Hz, 1H), 4.41 (s, 1H), 4.05 (d, *J* = 10.0 Hz, 1H), 3.81 (ddd, *J* = 14.5, 10.0, 6.1 Hz, 1H), 3.12 (dd, *J* = 14.4, 11.9 Hz, 1H), 3.05 (dd, *J* = 11.7, 6.1 Hz, 1H), 2.36 (s, 3H); <sup>13</sup>C NMR (100 MHz, CDCl<sub>3</sub>) δ 206.6, 194.9, 151.6, 135.4, 135.3, 129.2, 128.9, 128.0, 127.9, 118.8, 118.0, 115.6, 56.7, 48.8, 45.4, 29.8; HRMS (ESI-TOF) Calcd. for C<sub>18</sub>H<sub>18</sub>NO<sub>2</sub><sup>+</sup> [M+H]<sup>+</sup>: 280.1332; found: 280.1341.

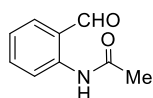

**N-(2-formylphenyl)acetamide (12).** Yellow solid, 65.3 mg, 80% yield, mp 128.3–129.8 °C; <sup>1</sup>H NMR (400 MHz, DMSO-*d*<sub>6</sub>) δ 11.04 (s, 1H), 8.45 (d, *J* = 8.3 Hz, 1H), 7.96 (dd, *J* = 7.9, 1.4 Hz, 1H), 7.59–7.55 (m, 1H), 7.15–7.11 (m, 1H), 2.13 (s, 3H); <sup>13</sup>C NMR (100 MHz, DMSO-*d*<sub>6</sub>) δ 169.4, 168.4, 140.8, 133.9, 131.0, 122.5, 119.9, 116.5, 25.0.

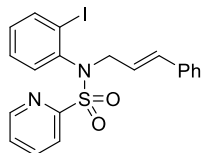

**N-cinnamyl-N-(2-iodophenyl)pyridine-2-sulfonamide (17).** Yellow oil, 381.1 mg, 80% yield; <sup>1</sup>H NMR (400 MHz, CDCl<sub>3</sub>) δ 8.84 (d, *J* = 4.6 Hz, 1H), 7.92–7.88 (m, 3H), 7.55 (dd, *J* = 8.8, 4.6 Hz, 1H), 7.33–7.30 (m, 4H), 7.28–7.24 (m, 2H), 7.10 (dd, *J* = 7.9, 1.5 Hz, 1H), 7.02 (td, *J* = 7.7, 1.5 Hz, 1H), 6.39 (dt, *J* = 15.7, 6.8 Hz, 1H), 6.30 (d, *J* = 15.9 Hz, 1H), 4.70 (dd, *J* = 14.8, 6.7 Hz, 1H), 4.59 (dd, *J* = 14.8, 6.9 Hz, 1H); <sup>13</sup>C NMR (100 MHz, CDCl<sub>3</sub>) δ 158.2, 150.1, 141.1, 140.3, 138.0, 136.3, 134.5, 131.7, 130.1, 128.9, 128.5, 127.9, 126.9, 126.5, 123.8, 123.2, 102.8, 55.3.

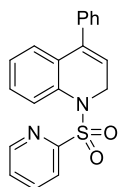

**4-phenyl-1-(pyridin-2-ylsulfonyl)-1,2-dihydroquinoline (18).** Yellow solid, 139.4 mg, 80% yield, mp 162.9–164.5 °C; <sup>1</sup>H NMR (400 MHz, CDCl<sub>3</sub>) δ 8.62 (d, *J* = 4.4 Hz, 1H), 8.08 (d, *J* = 7.9 Hz, 1H), 7.89 (td, *J* = 7.8, 1.5 Hz, 1H), 7.64 (d, *J* = 8.1 Hz, 1H), 7.55 (d, *J* = 7.7 Hz, 1H), 7.49–7.45

(m, 3H), 7.39 (d,  $J = 7.5$  Hz, 2H), 7.35 – 7.31 (m, 1H), 7.24 (t,  $J = 7.7$  Hz, 1H), 7.07 (t,  $J = 7.5$  Hz, 1H), 6.90 (t,  $J = 2.9$  Hz, 1H), 5.36 (d,  $J = 2.9$  Hz, 2H);  $^{13}\text{C}$  NMR (100 MHz,  $\text{CDCl}_3$ )  $\delta$  156.2, 150.4, 142.9, 138.0, 136.4, 132.7, 131.3, 129.7, 128.9, 128.5, 127.3, 123.9, 123.0, 120.4, 118.6, 114.3, 56.2.

## 12. References

1. L.-B. Jiang, X. Qi, X.-F. Wu, Benzene-1,3,5-triyltriformate (TFBen): a convenient, efficient, and non-reacting CO source in carbonylation reactions. *Tetrahedron Lett.* 2016, **57**, 3368-3370.
2. E. Hernando, R. R. Castillo, N. Rodriguez, R. G. Arrayas, J. C. Carretero, Copper-catalyzed mild nitration of protected anilines. *Chem. Eu. J.* 2014, **20**, 13854-13859.
3. X. Chen, C. A. Baratay, M. E. Mark, X. Xu, P. W. H. Chan, Gold and brønsted acid catalyzed spirocyclization of 2- and 3-indolyl-tethered 1,4-enyne acetates to spiro[4,n]alkyl[b]indoles. *Org. Lett.* 2020, **22**, 2849–2853.
4. M. S. Baird, A. V. Nizovtsev, I. G. Bolesov, Bromine–magnesium exchange in gem-dibromocyclopropanes using Grignard reagents. *Tetrahedron* 2002, **58**, 1581-1593.
5. M. B. M. Reddy, M. A. Pasha, Cs<sub>2</sub>CO<sub>3</sub> catalyzed rapid and efficient conversion of amines into sulfonamides; alcohols and phenols into sulfonic esters. *Phosphorus, Sulfur, Silicon Relat. Elem.* 2011, **186**, 1867-1875.
6. Y. Tani, T. Fujihara, J. Terao, Y. Tsuji, Copper-catalyzed regiodivergent silacarboxylation of allenes with carbon dioxide and a silylborane. *J. Am. Chem. Soc.* 2014, **136**, 17706-17709.
7. H. X. Xue, H. Tan, D. L. Wei, Y. Wei, S. X. Lin, F. S. Liang, B. Z. Zhao, *N*-Bromosuccinimide-carboxylic acid combination: mild and efficient access to dibromination of unsaturated carbonyl compounds. *RSC Adv.* 2013, **3**, 5382-5385.
8. K. T. Ashitha, P. P. Vinaya, A. Krishna, D. C. Vincent, R. Jalaja, S. Varughese, S. B. Somappa, I<sub>2</sub>/TBHP mediated diastereoselective synthesis of spiroaziridines. *Org. Biomol. Chem.* 2020, **18**, 1588-1593.
9. O. Bortolini, G. Fantin, M. Fogagnolo, P. P. Giovannini, A. Massi, S. Pacifico, Thiazolium-catalyzed intermolecular Stetter reaction of linear and cyclic alkyl  $\alpha$ -diketones. *Org. Biomol. Chem.* 2011, **9**, 8437-8444.
10. A. Garcia-Rubia, B. Urones, R. G. Arrayas, J. C. Carretero, Pd<sup>II</sup>-catalyzed C-H olefination of *N*-(2-Pyridyl)sulfonyl anilines and arylalkylamines. *Angew. Chem. Int. Ed.* 2011, **50**, 10927-10931.
11. M.-G. Rong, T.-Z. Qin, W. Zi, Rhenium-catalyzed intramolecular carboalkoxylation and carboamination of alkynes for the synthesis of C3-substituted benzofurans and indoles. *Org. Lett.* 2019, **21**, 5421-5425.



### 13. X-ray crystal data for compound 3aa

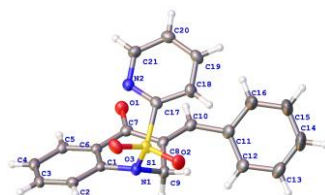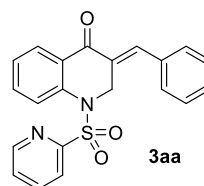

| Compound                                    | <b>3aa</b>                                                      |
|---------------------------------------------|-----------------------------------------------------------------|
| Empirical formula                           | C <sub>21</sub> H <sub>16</sub> N <sub>2</sub> O <sub>3</sub> S |
| Formula weight                              | 376.42                                                          |
| Temperature/K                               | 99.99(10)                                                       |
| Crystal system                              | triclinic                                                       |
| Space group                                 | P-1                                                             |
| a/Å                                         | 6.9424(6)                                                       |
| b/Å                                         | 8.1632(6)                                                       |
| c/Å                                         | 17.1903(15)                                                     |
| α/°                                         | 88.645(7)                                                       |
| β/°                                         | 89.576(7)                                                       |
| γ/°                                         | 73.503(7)                                                       |
| Volume/Å <sup>3</sup>                       | 933.85(14)                                                      |
| Z                                           | 2                                                               |
| ρ <sub>calc</sub> /cm <sup>3</sup>          | 1.339                                                           |
| μ/mm <sup>-1</sup>                          | 0.197                                                           |
| F(000)                                      | 392.0                                                           |
| Crystal size/mm <sup>3</sup>                | 0.12 × 0.11 × 0.1                                               |
| Radiation                                   | Mo Kα (λ = 0.71073)                                             |
| 2θ range for data collection /°             | 4.74 to 49.998                                                  |
| Index ranges                                | -8 ≤ h ≤ 7, -8 ≤ k ≤ 9, -20 ≤ l ≤ 20                            |
| Reflections collected                       | 5946                                                            |
| Independent reflections                     | 3289 [R <sub>int</sub> =0.0279, R <sub>sigma</sub> =0.0518]     |
| Data/restraints/parameters                  | 3289/0/245                                                      |
| Goodness-of-fit on F <sup>2</sup>           | 1.055                                                           |
| Final R indexes [I ≥ 2σ(I)]                 | R <sub>1</sub> = 0.0609, wR <sub>2</sub> = 0.1369               |
| Final R indexes [all data]                  | R <sub>1</sub> = 0.0700, wR <sub>2</sub> = 0.1419               |
| Largest diff. peak/hole / e Å <sup>-3</sup> | 0.71/-0.44                                                      |

14.  $^1\text{H}$ ,  $^{13}\text{C}$  spectra of 1a–1l, 2a–2w, 3aa–3aw, 3ba–3la, 4–6, 7, 12, 15/15', 17 and 18

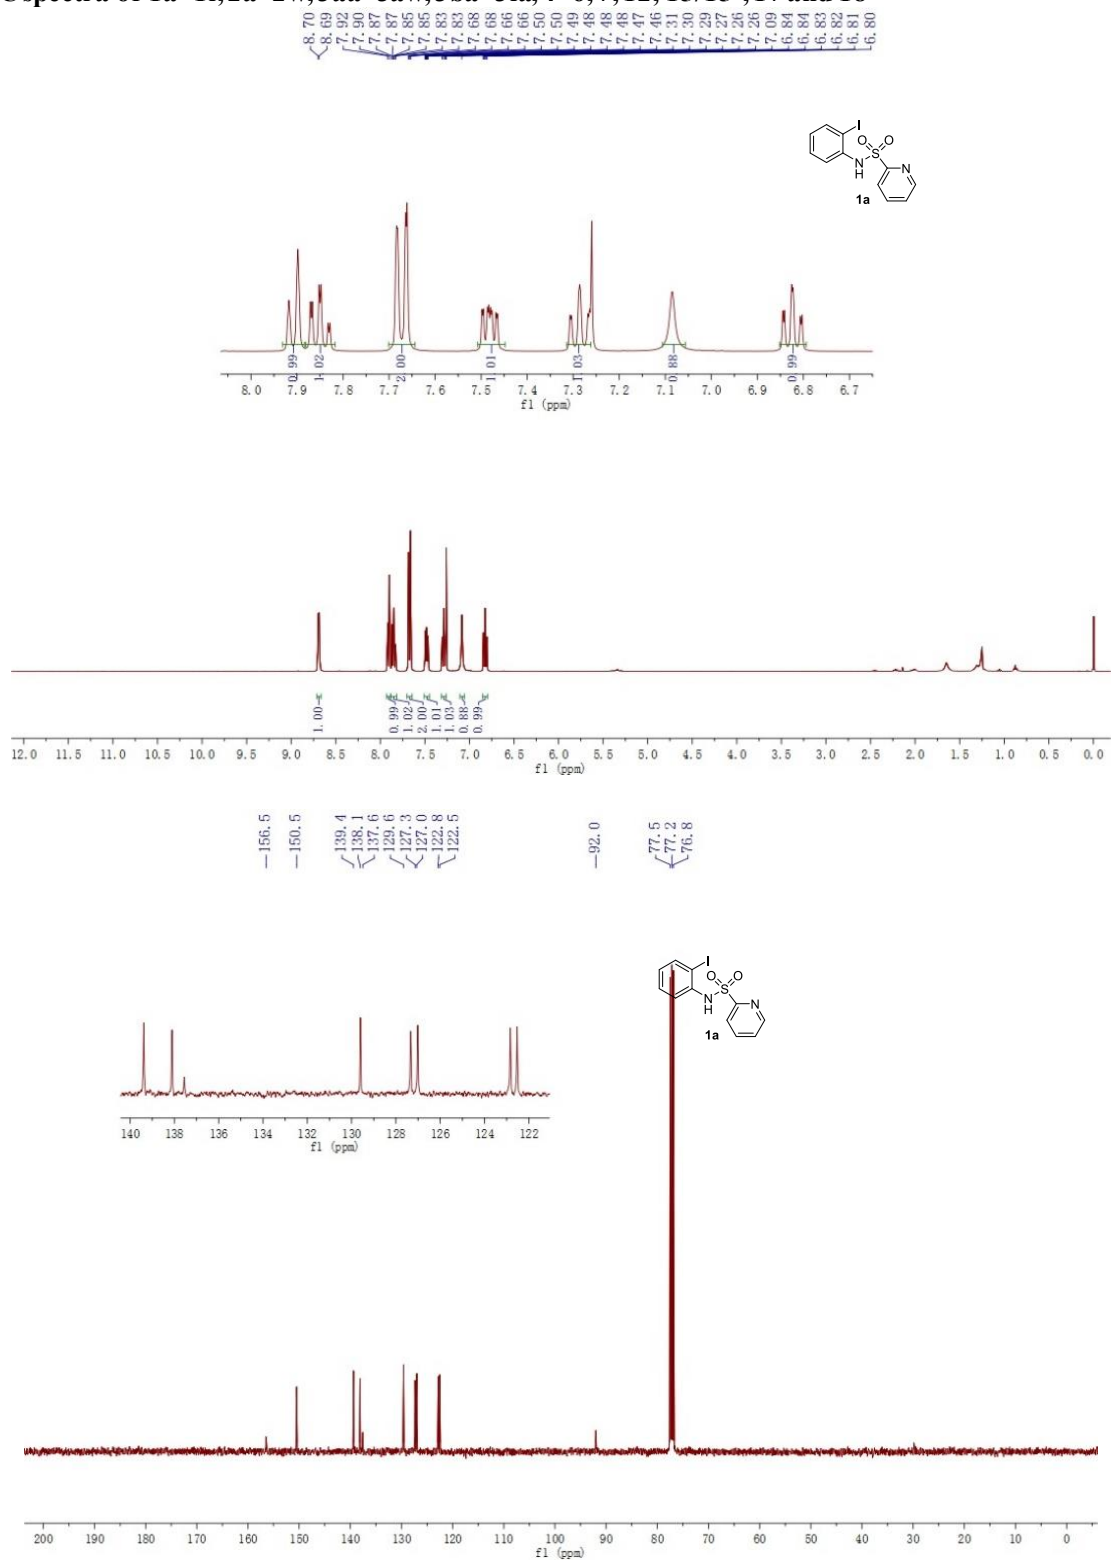

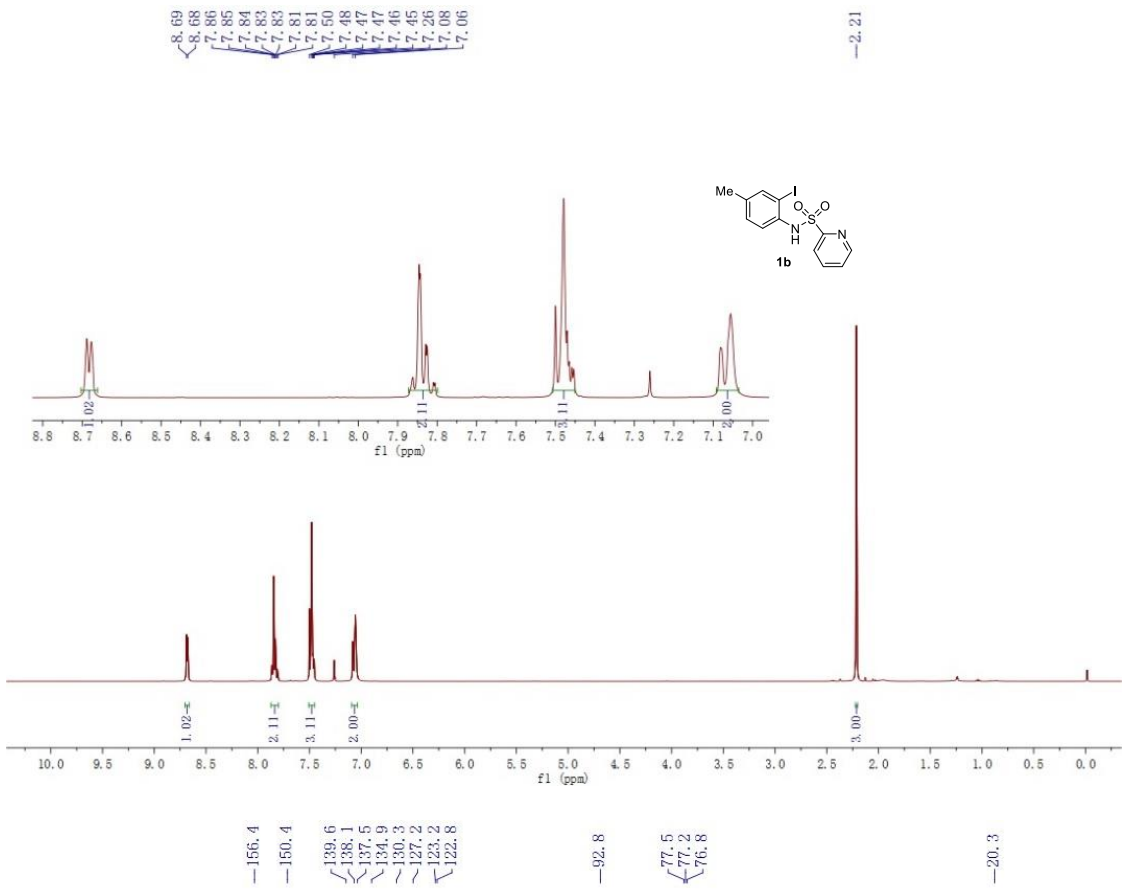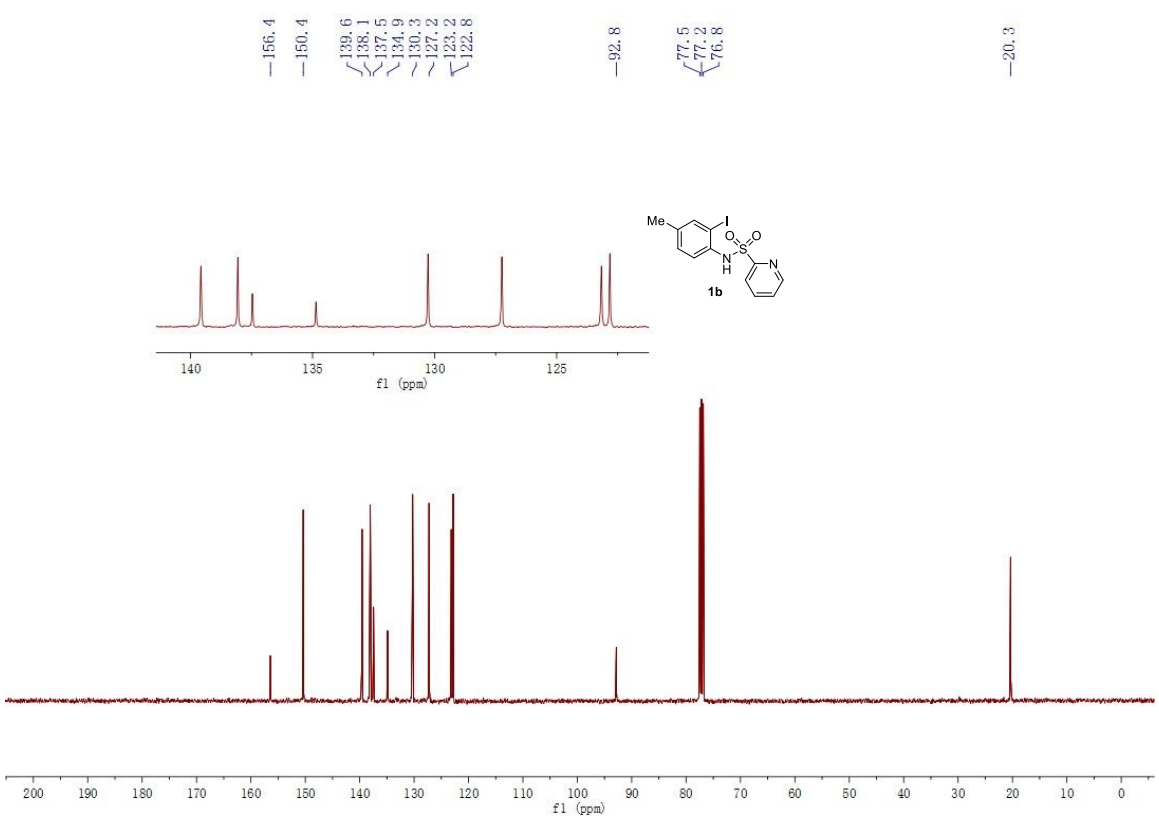

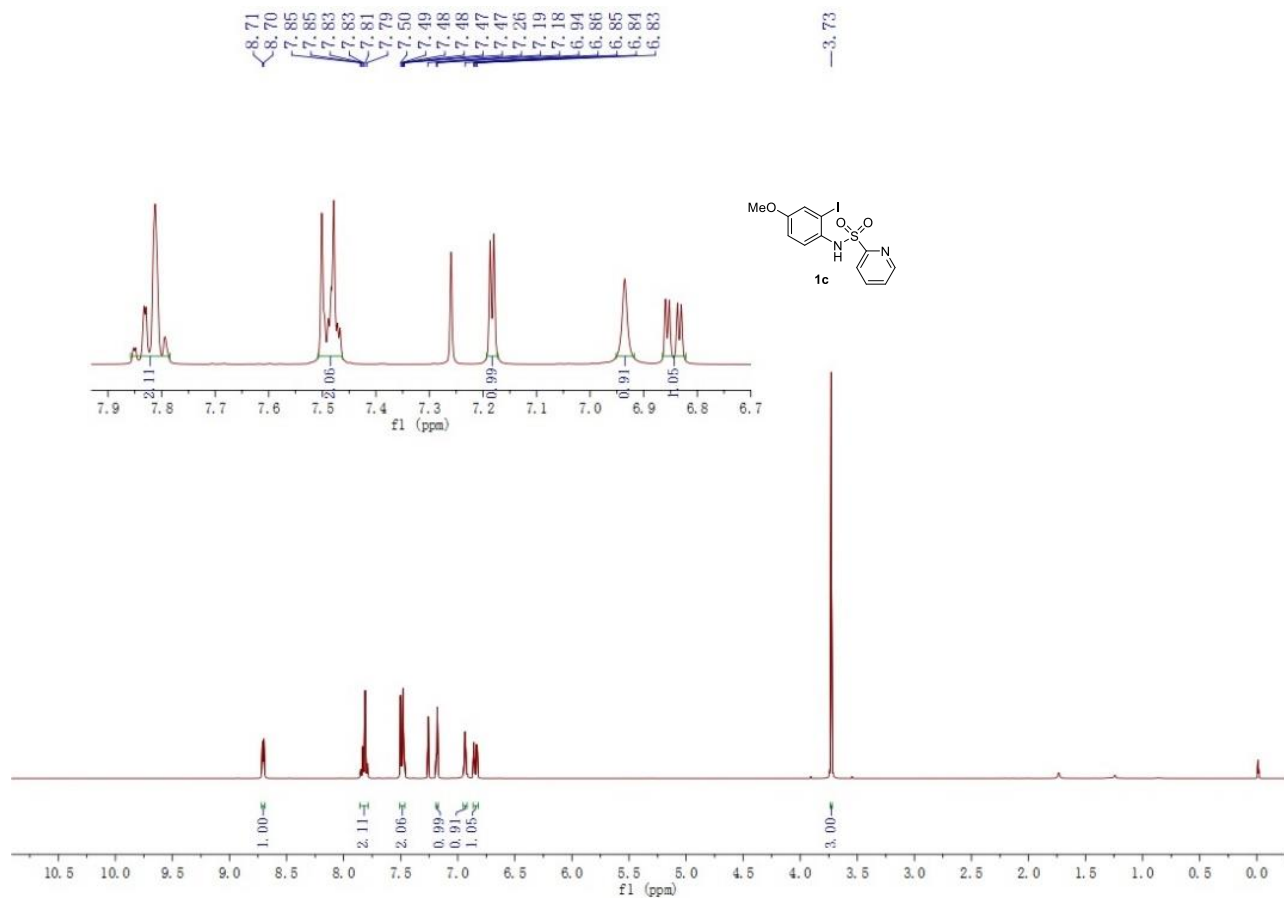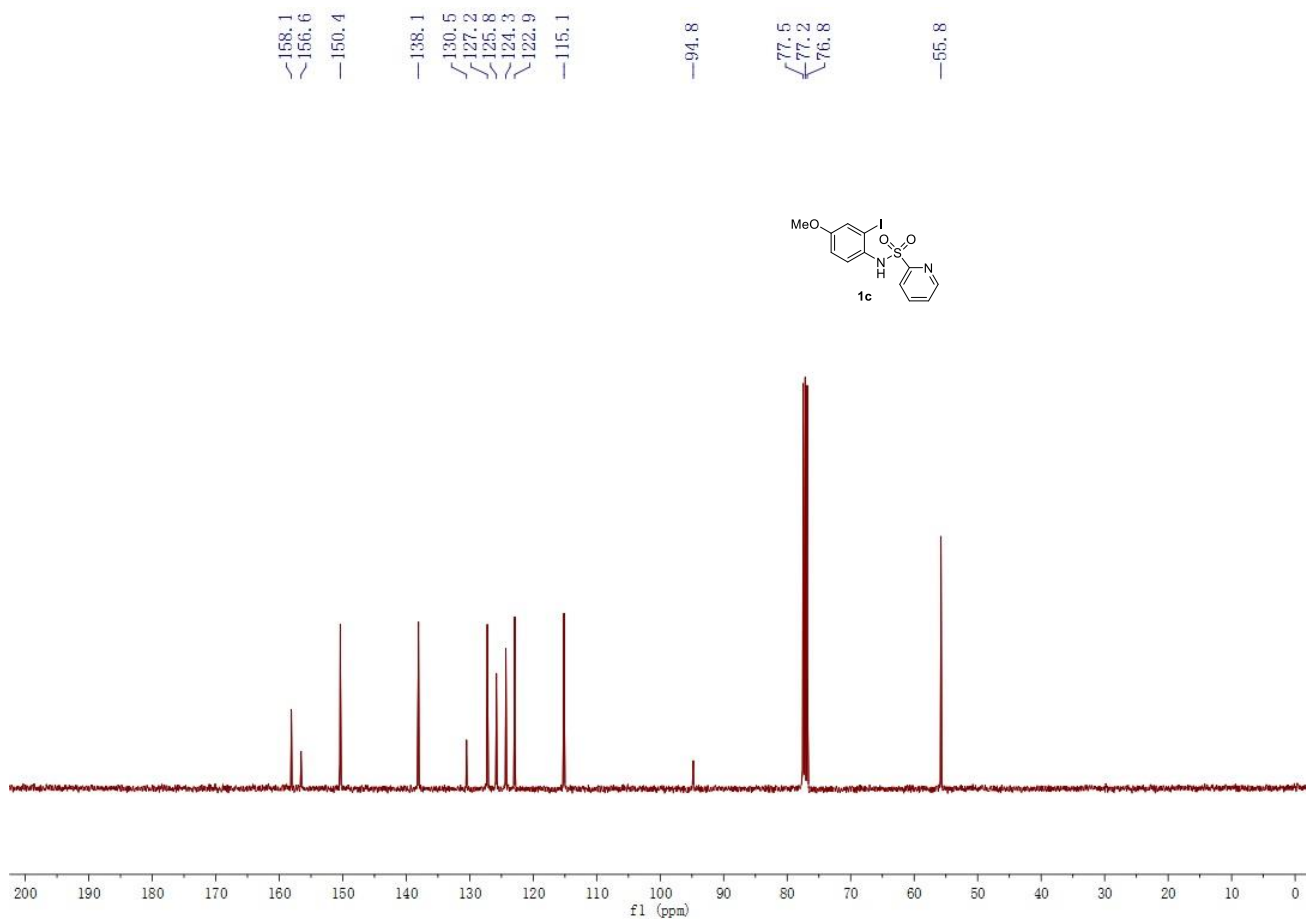

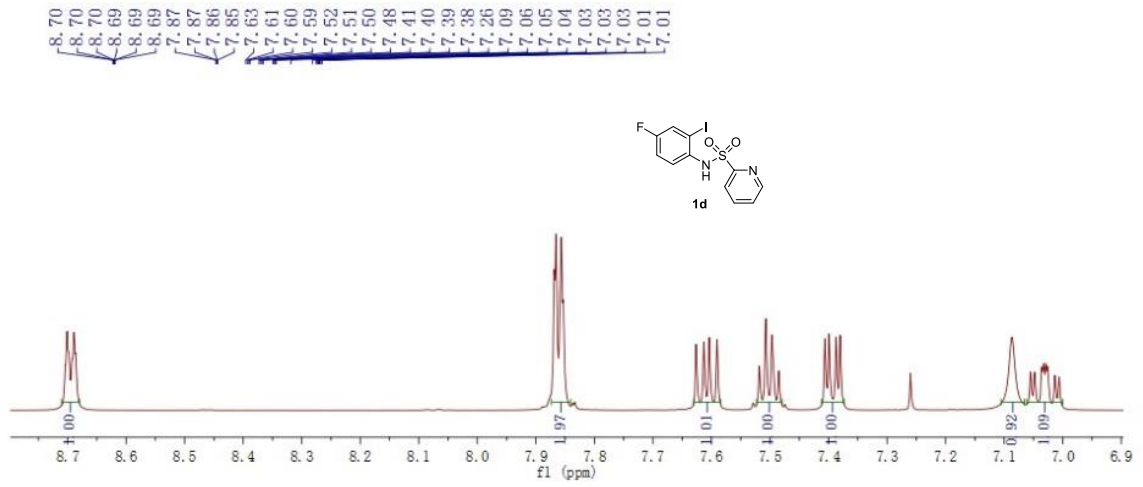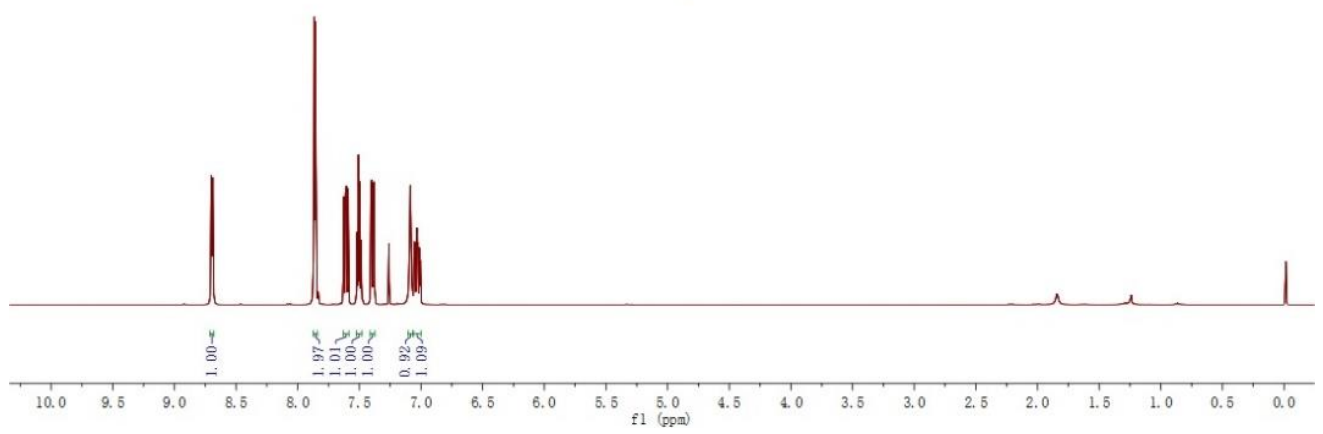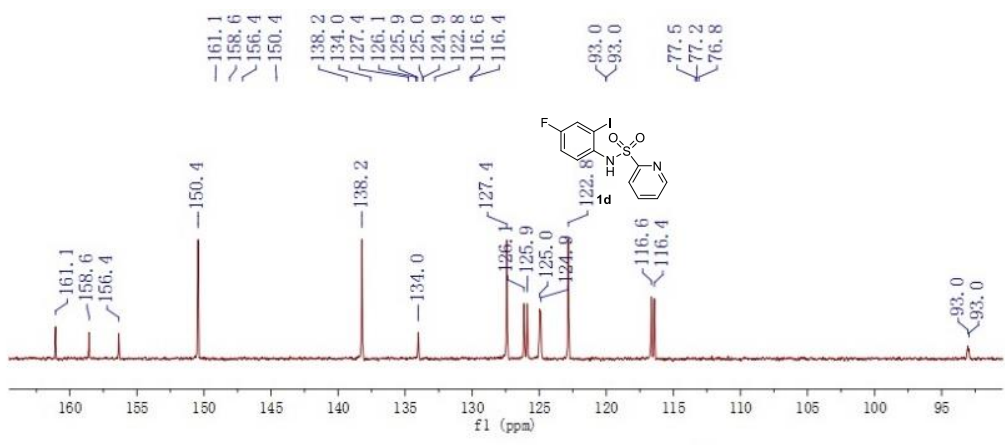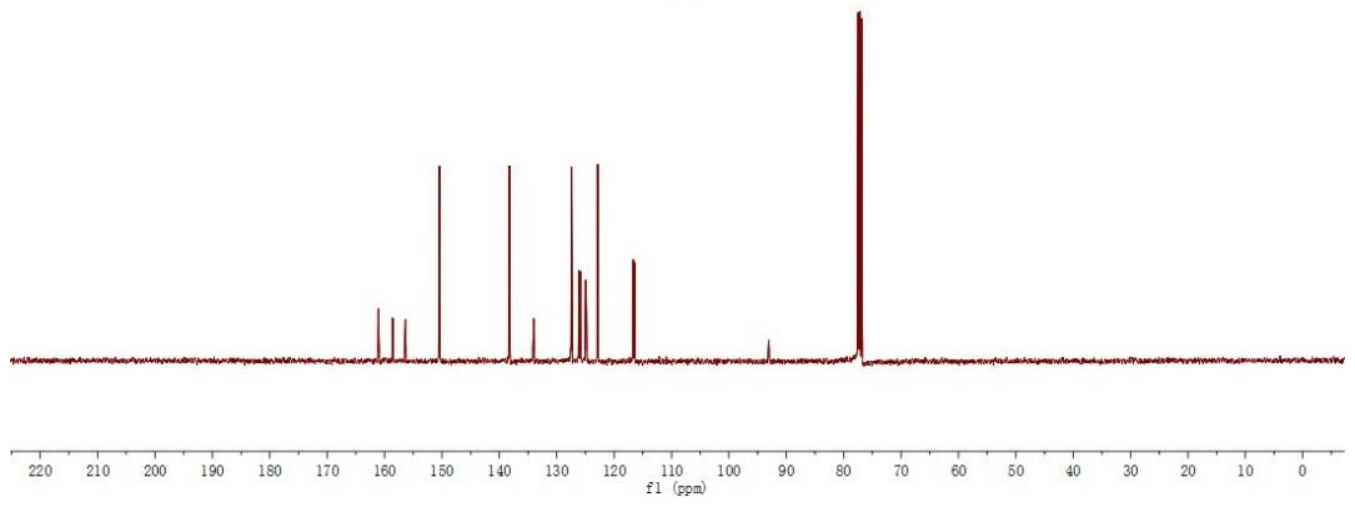

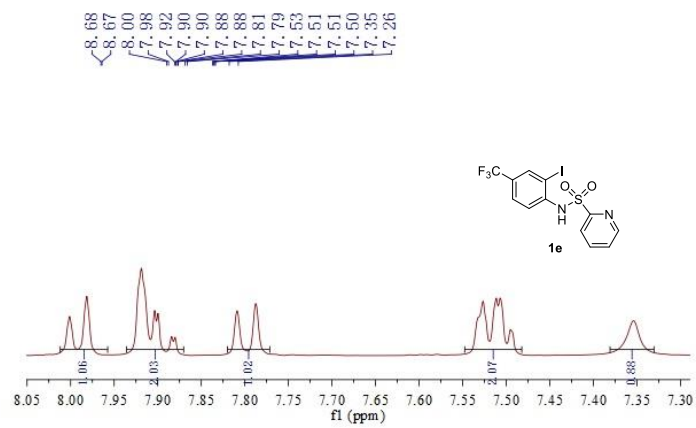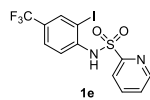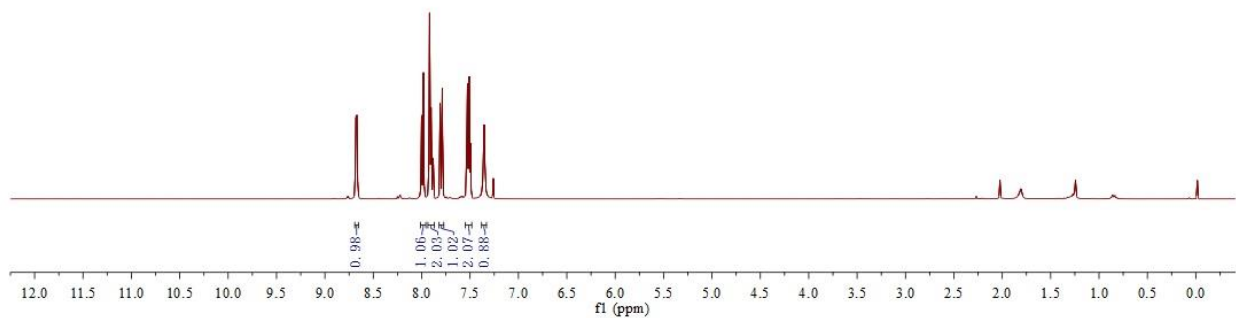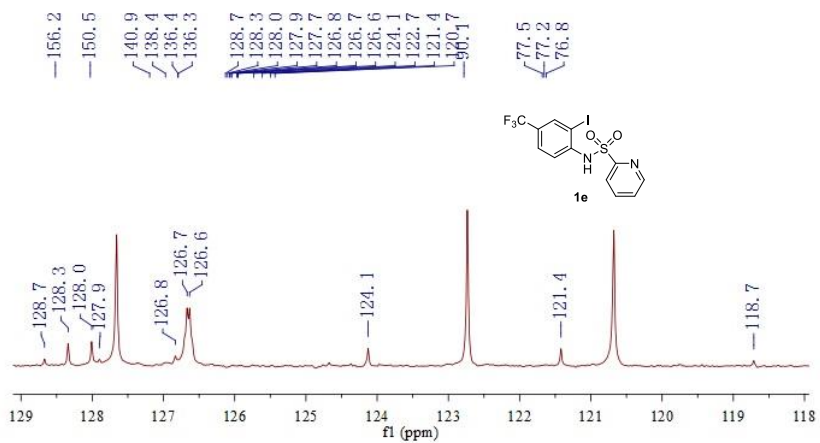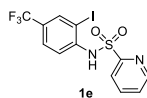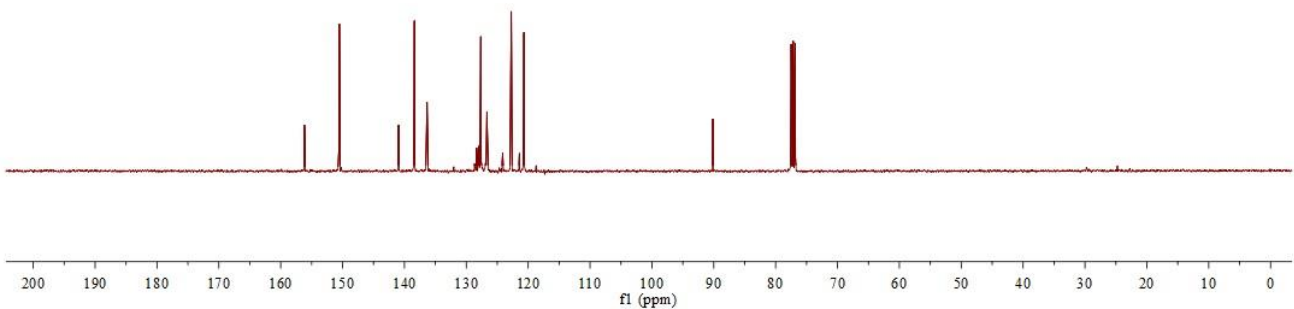



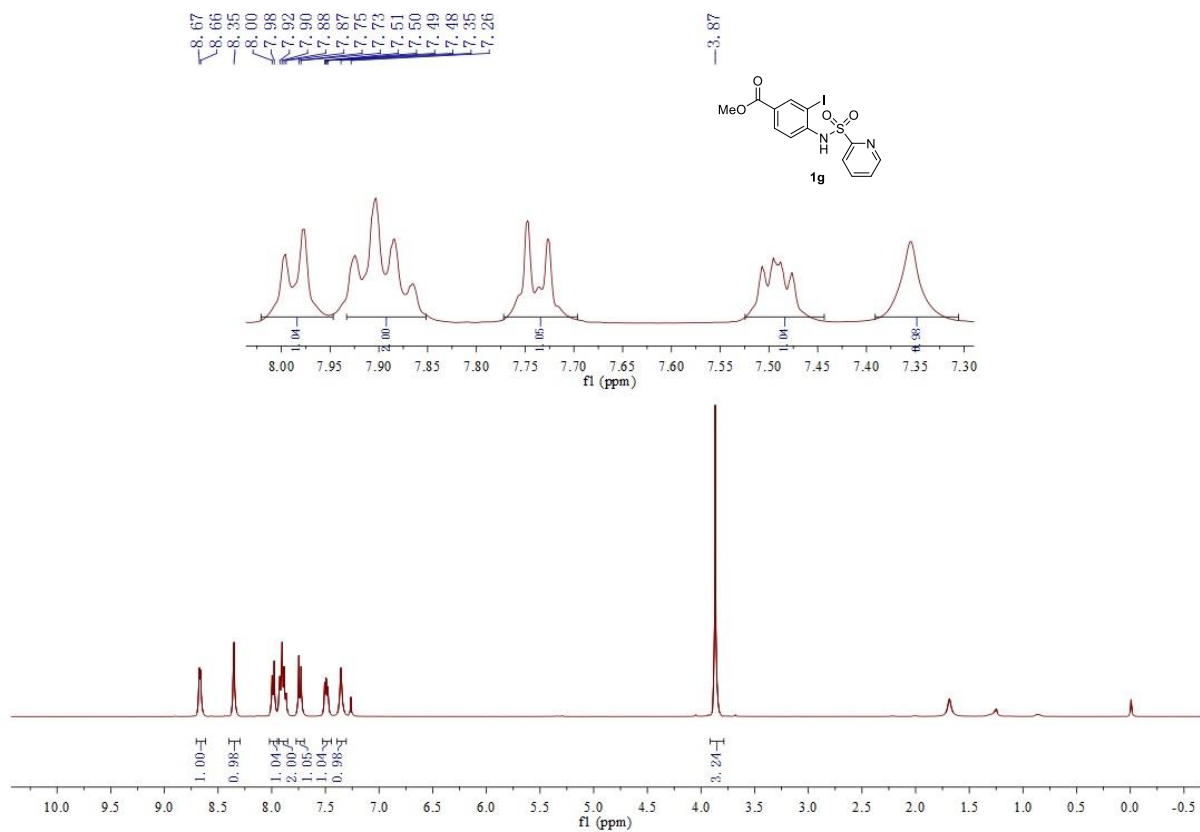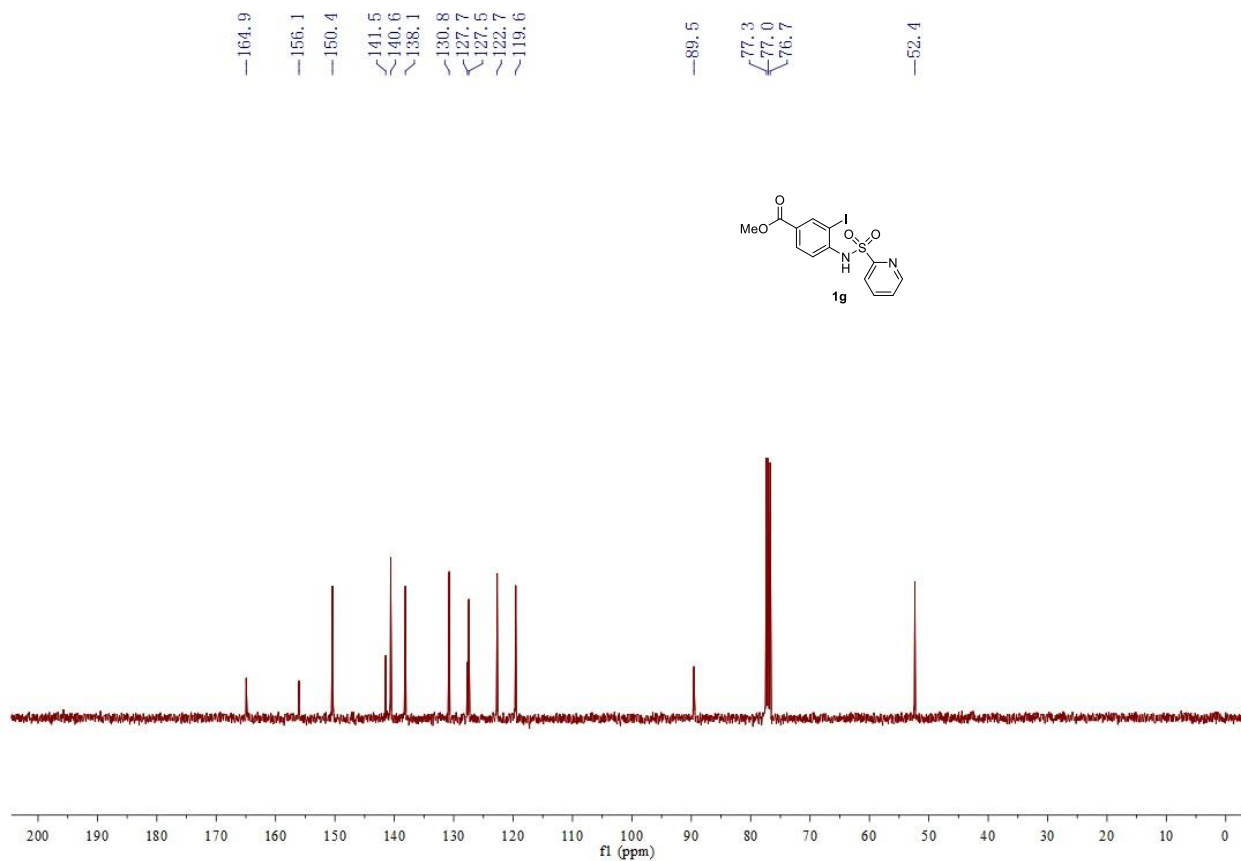





8.70  
8.70  
8.69  
8.69  
7.97  
7.95  
7.91  
7.91  
7.89  
7.89  
7.87  
7.87  
7.71  
7.70  
7.59  
7.57  
7.52  
7.52  
7.51  
7.51  
7.50  
7.50  
7.49  
7.49  
7.26  
7.11  
6.83  
6.83  
6.81  
6.81

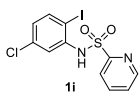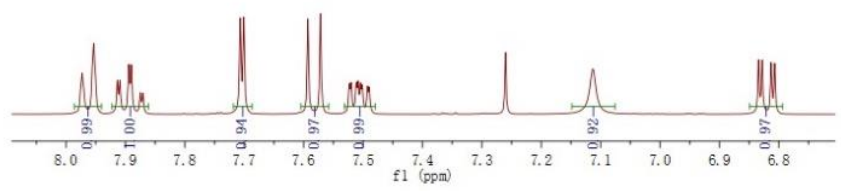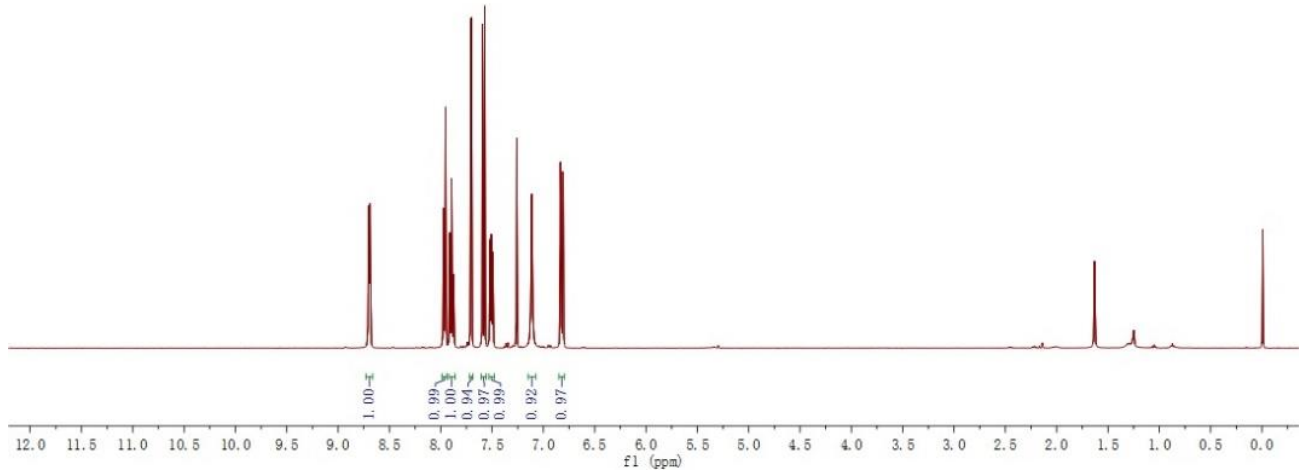

156.2  
150.6  
139.9  
138.7  
138.3  
135.6  
127.5  
127.0  
122.8  
122.0  
88.5  
77.5  
77.2  
76.8

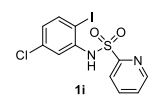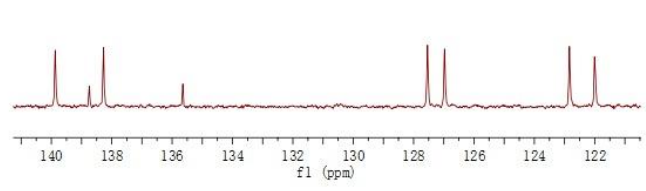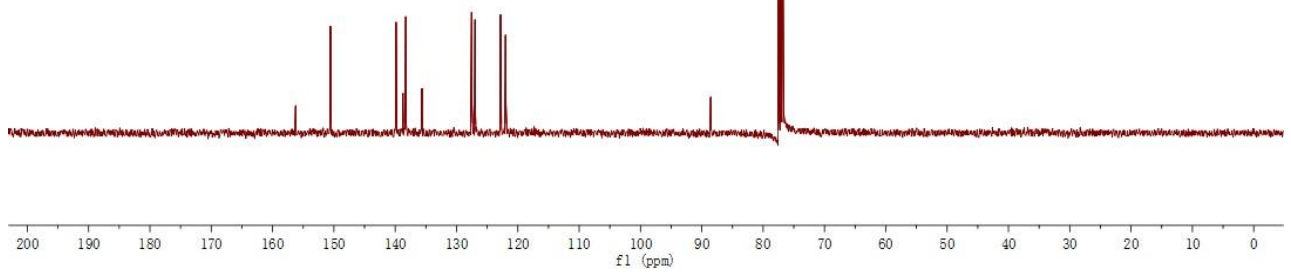

8.71  
8.69  
7.97  
7.95  
7.91  
7.91  
7.90  
7.89  
7.88  
7.87  
7.84  
7.84  
7.53  
7.51  
7.51  
7.49  
7.49  
7.26  
7.09  
6.97  
6.95  
6.94

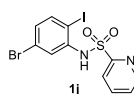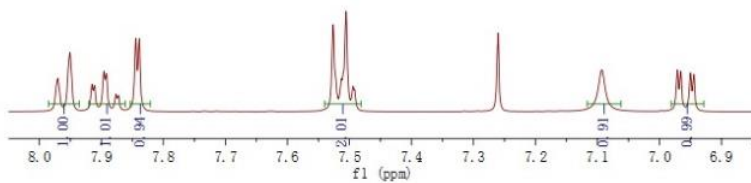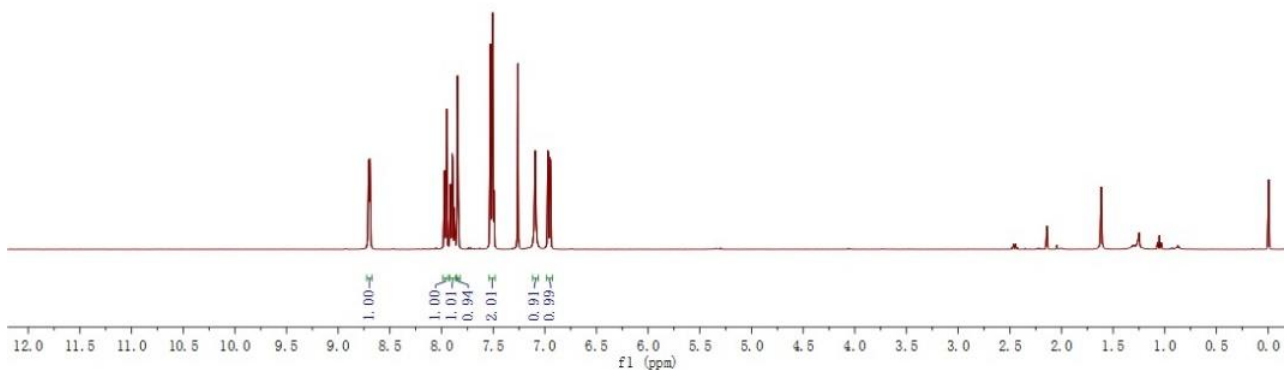

156.2  
150.6  
140.2  
138.9  
138.3  
129.9  
127.5  
124.9  
123.3  
122.8  
89.5  
77.5  
77.2  
76.8

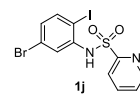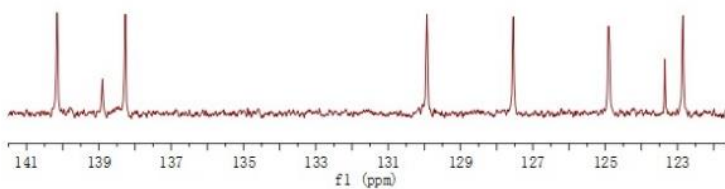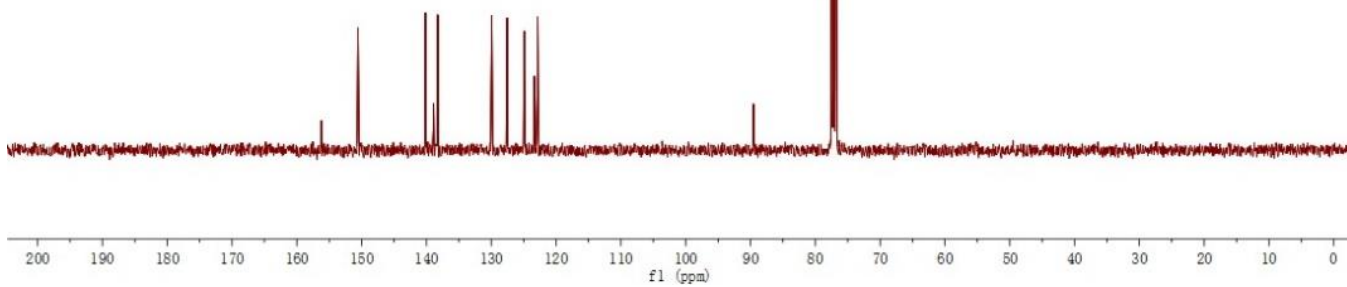

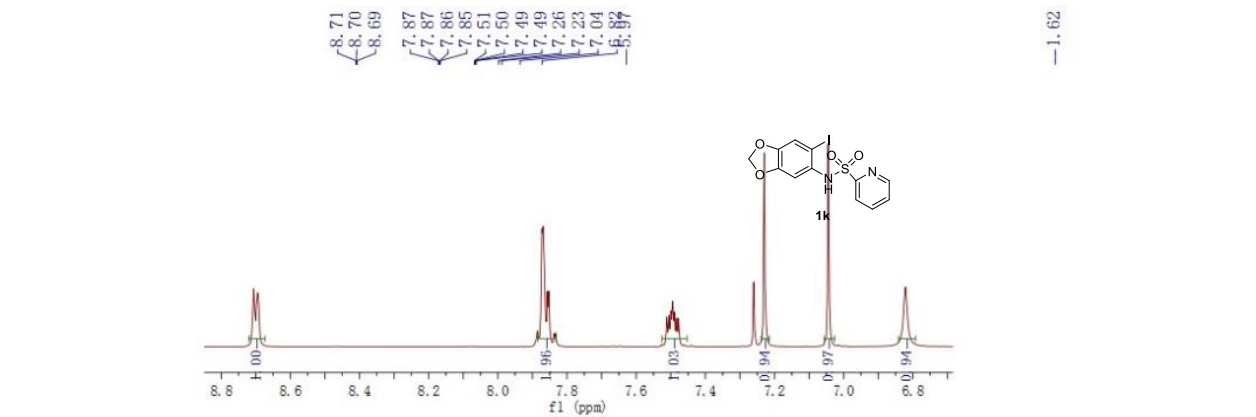

—1.62

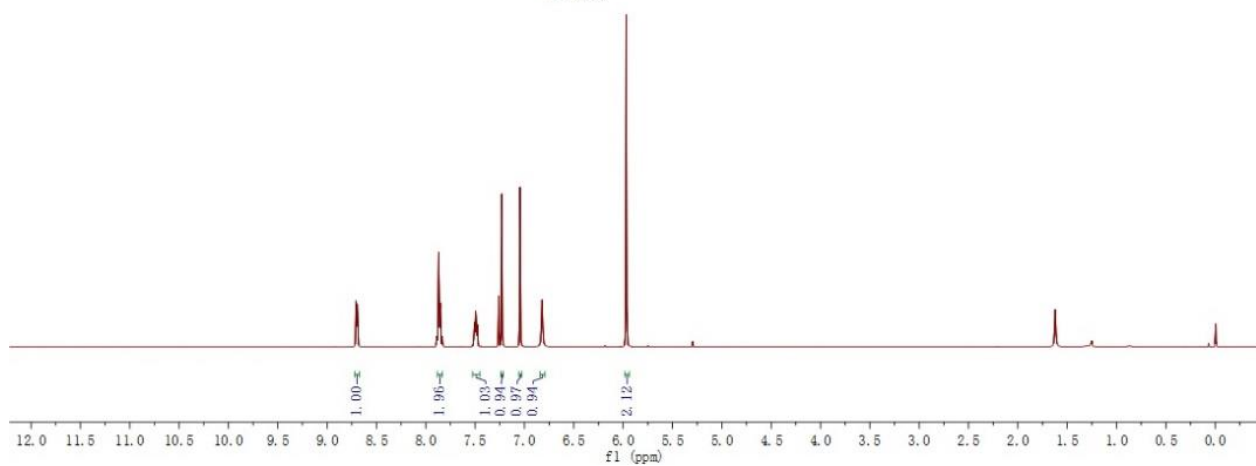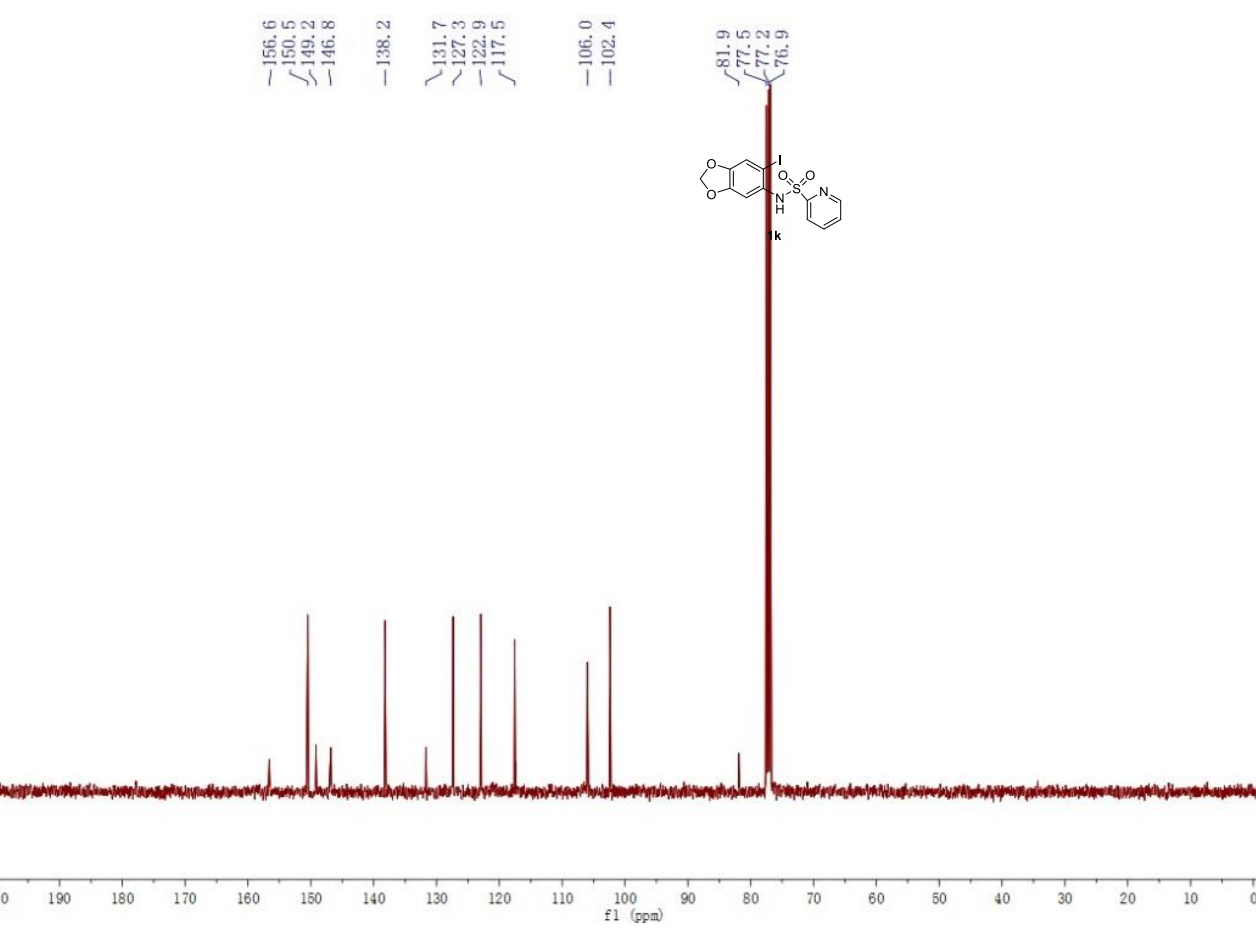

-9.82  
 <8.76  
 <8.75  
 <8.05  
 <8.04  
 <7.82  
 <7.80  
 <7.69  
 <7.68  
 <7.67  
 <6.89  
 -3.35  
 <2.50  
 <2.12  
 <2.04

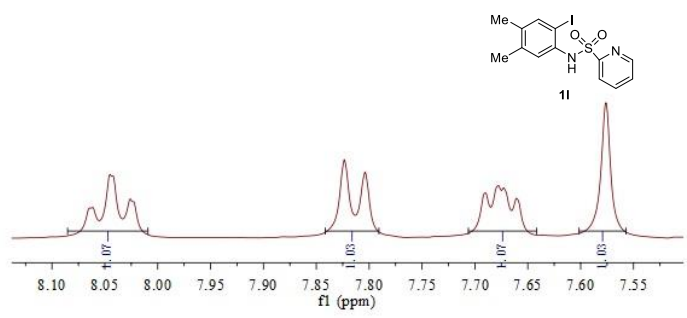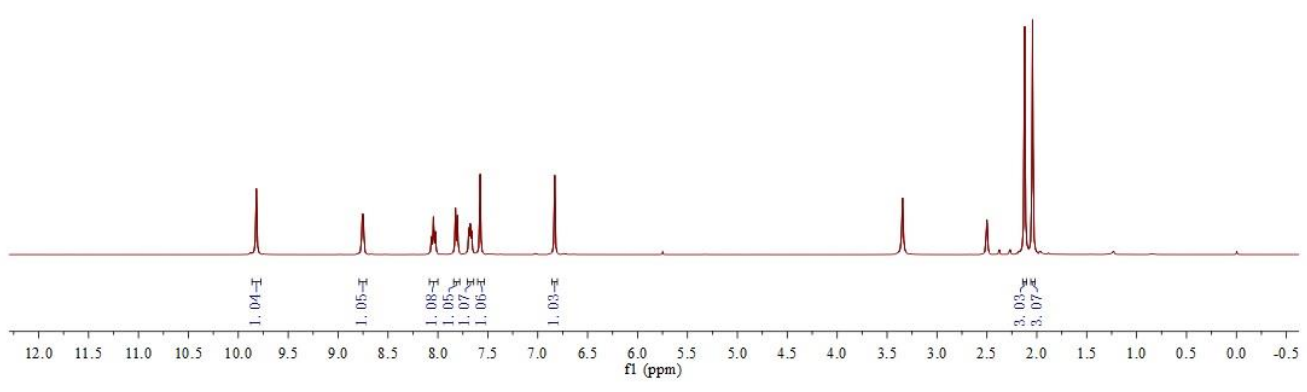

-157.5  
 -150.0  
 <139.6  
 <138.6  
 <137.6  
 <137.1  
 <135.7  
 <129.5  
 <127.2  
 <122.2  
 -95.8  
 <40.1  
 <39.9  
 <39.7  
 <39.5  
 <39.3  
 <39.1  
 <38.9  
 <19.0  
 <18.2

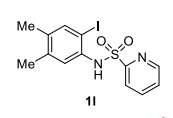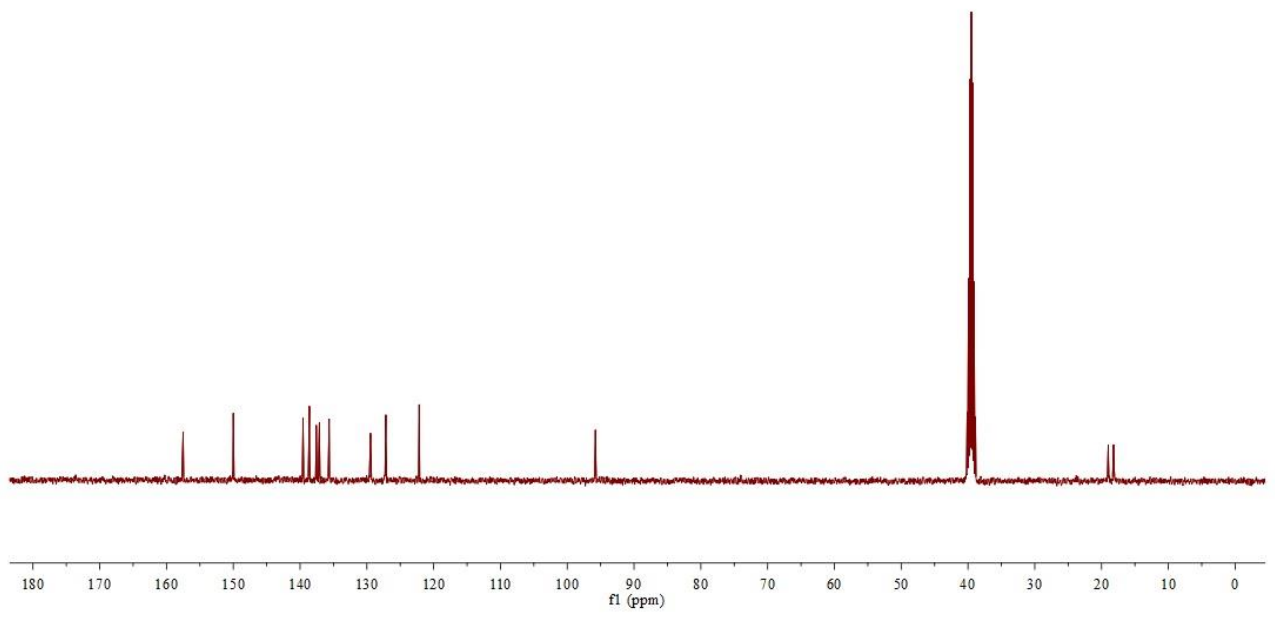

7.45  
7.44  
7.36  
7.35  
7.34  
7.33  
6.33  
6.32  
6.31  
6.31  
6.30  
6.29  
5.29  
5.27

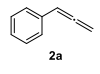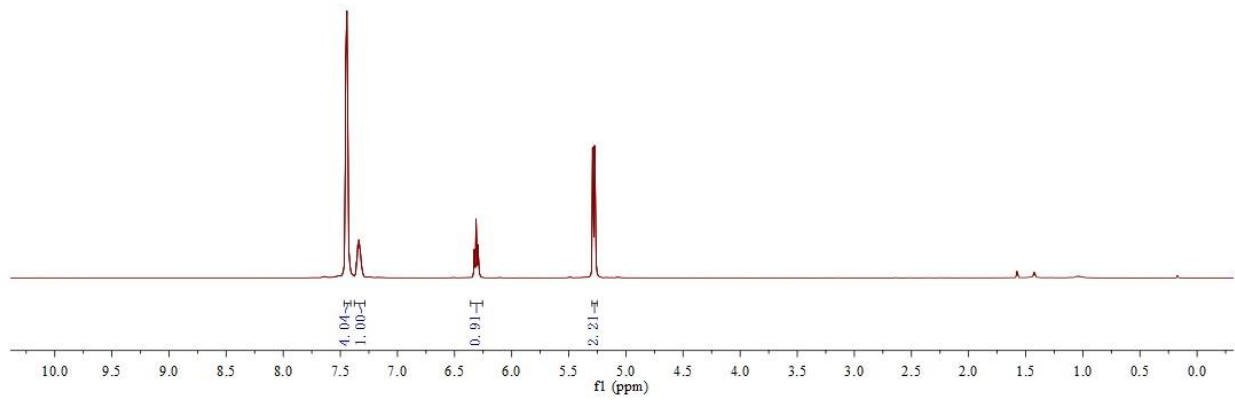

209.9  
134.0  
128.7  
127.0  
126.8  
94.1  
78.9  
77.5  
77.2  
76.8

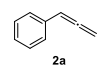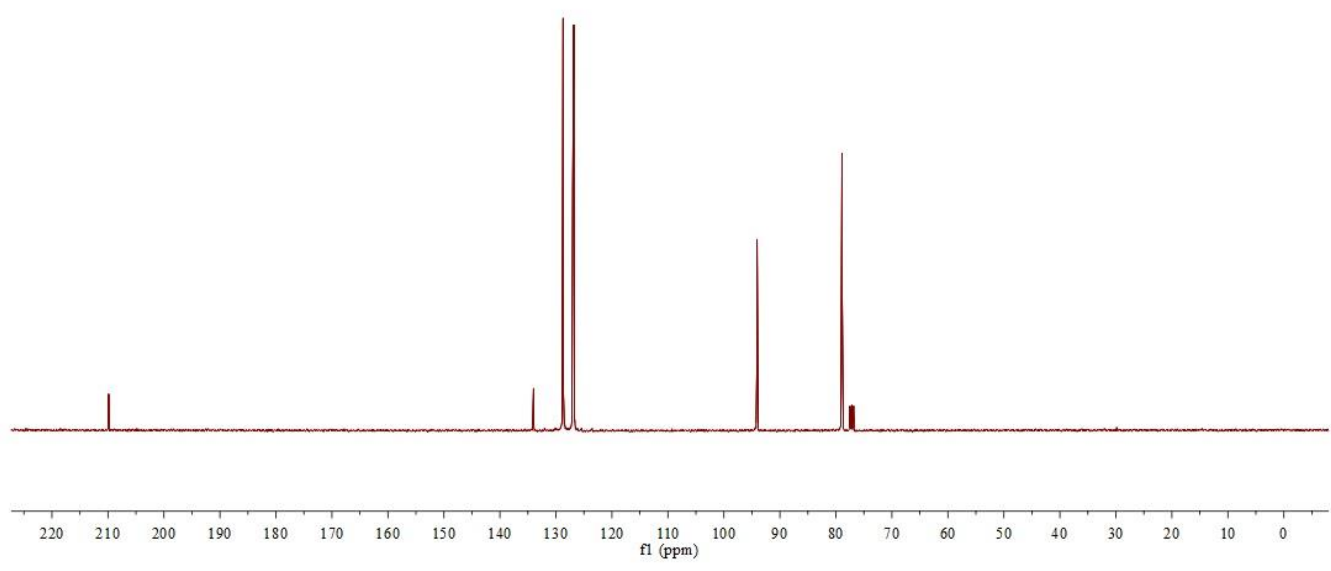

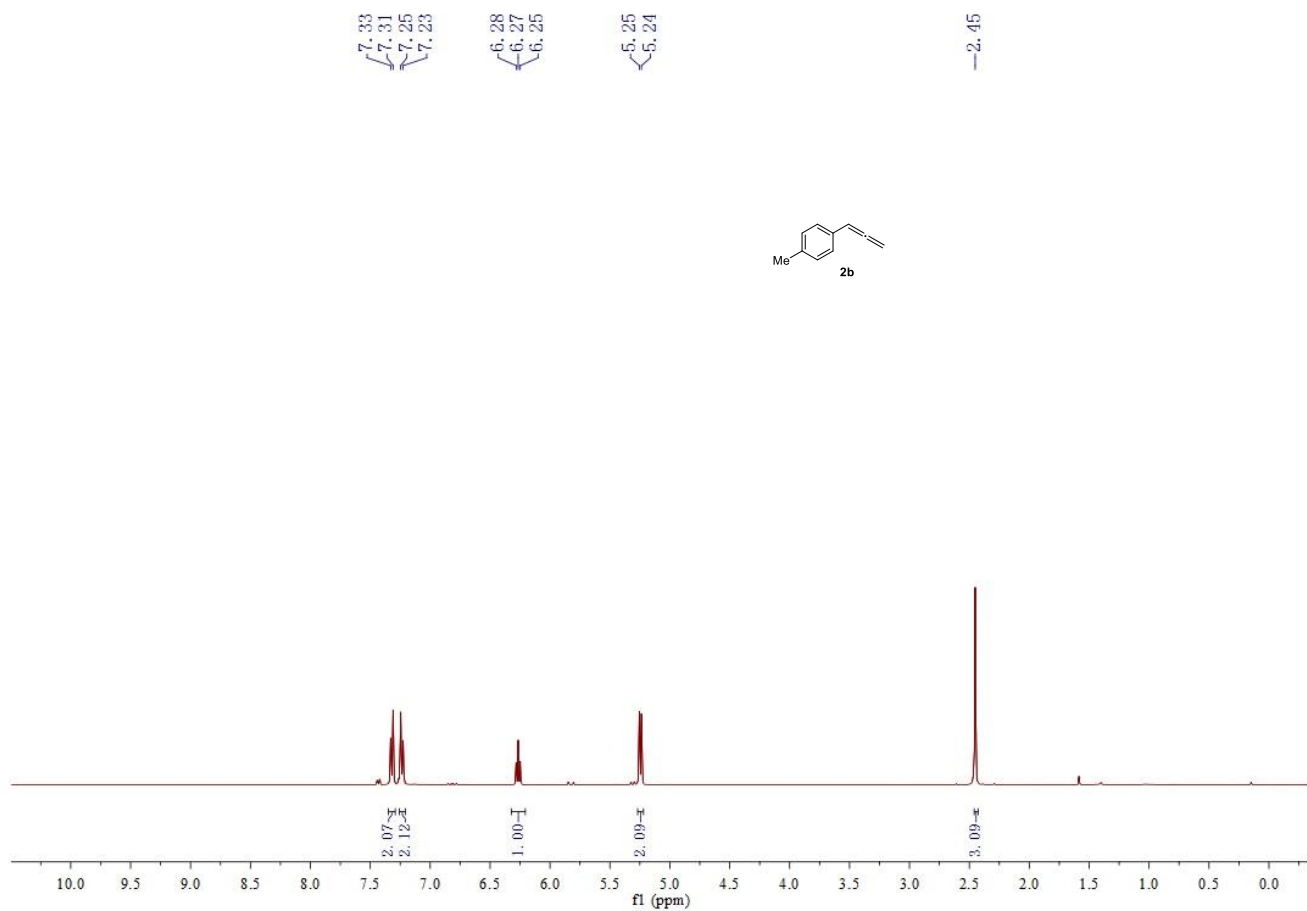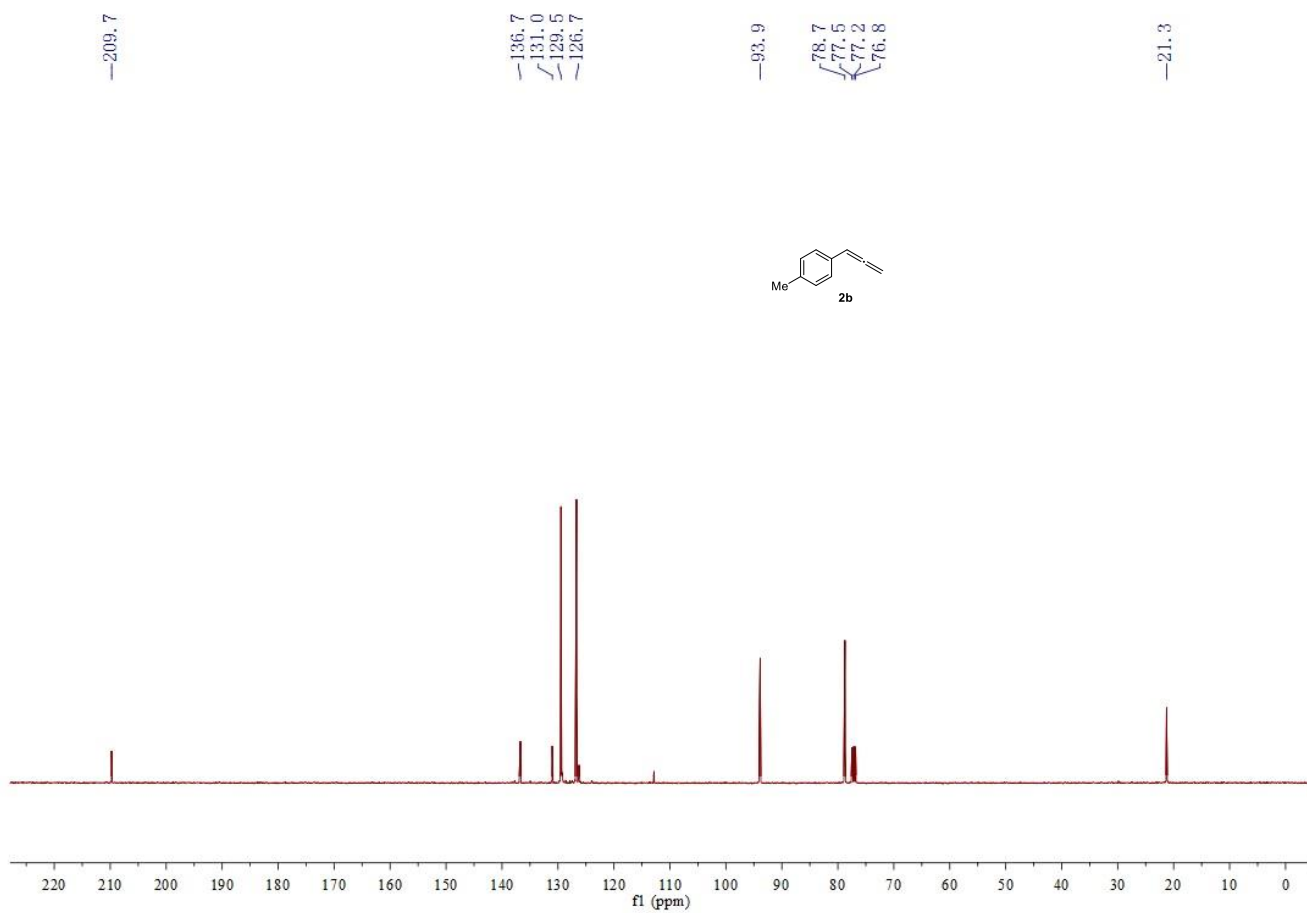

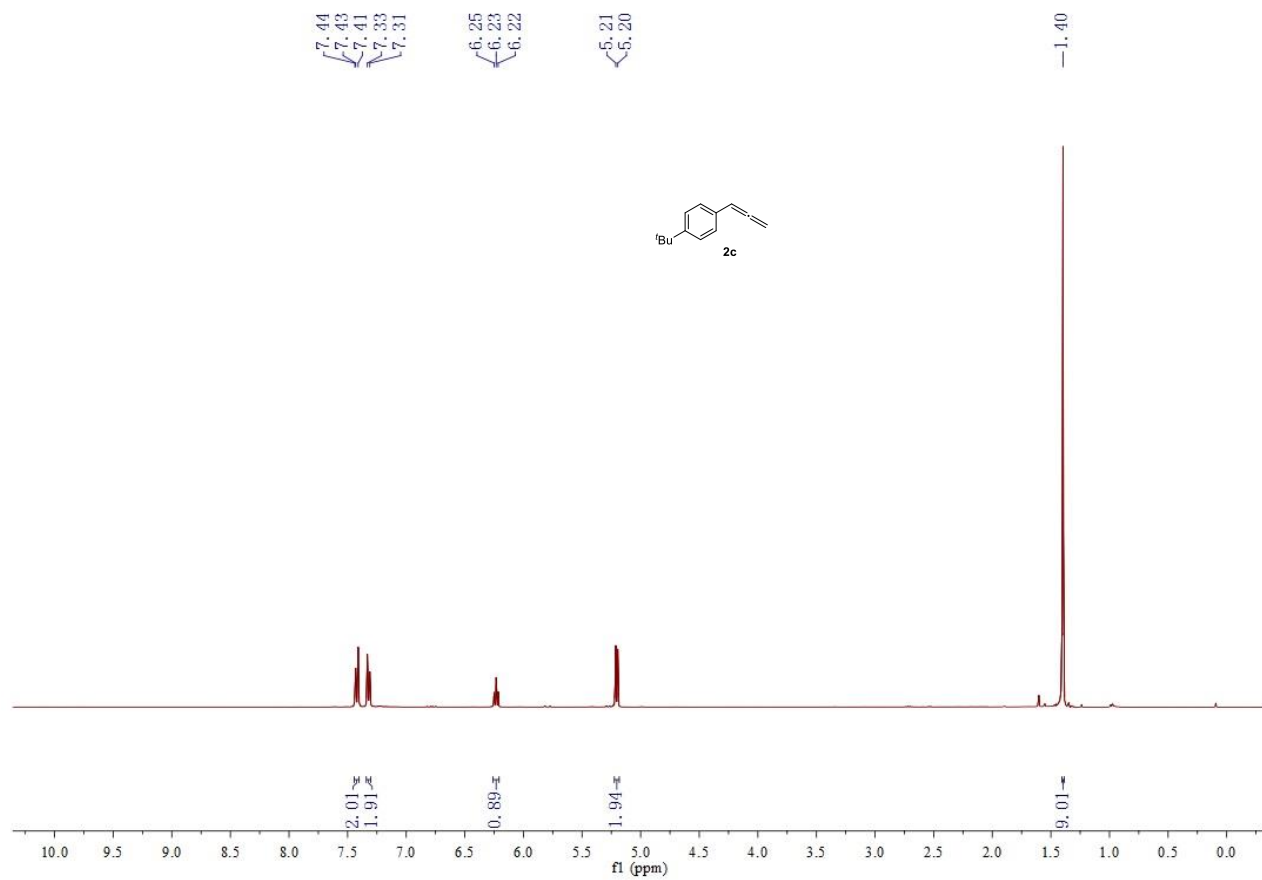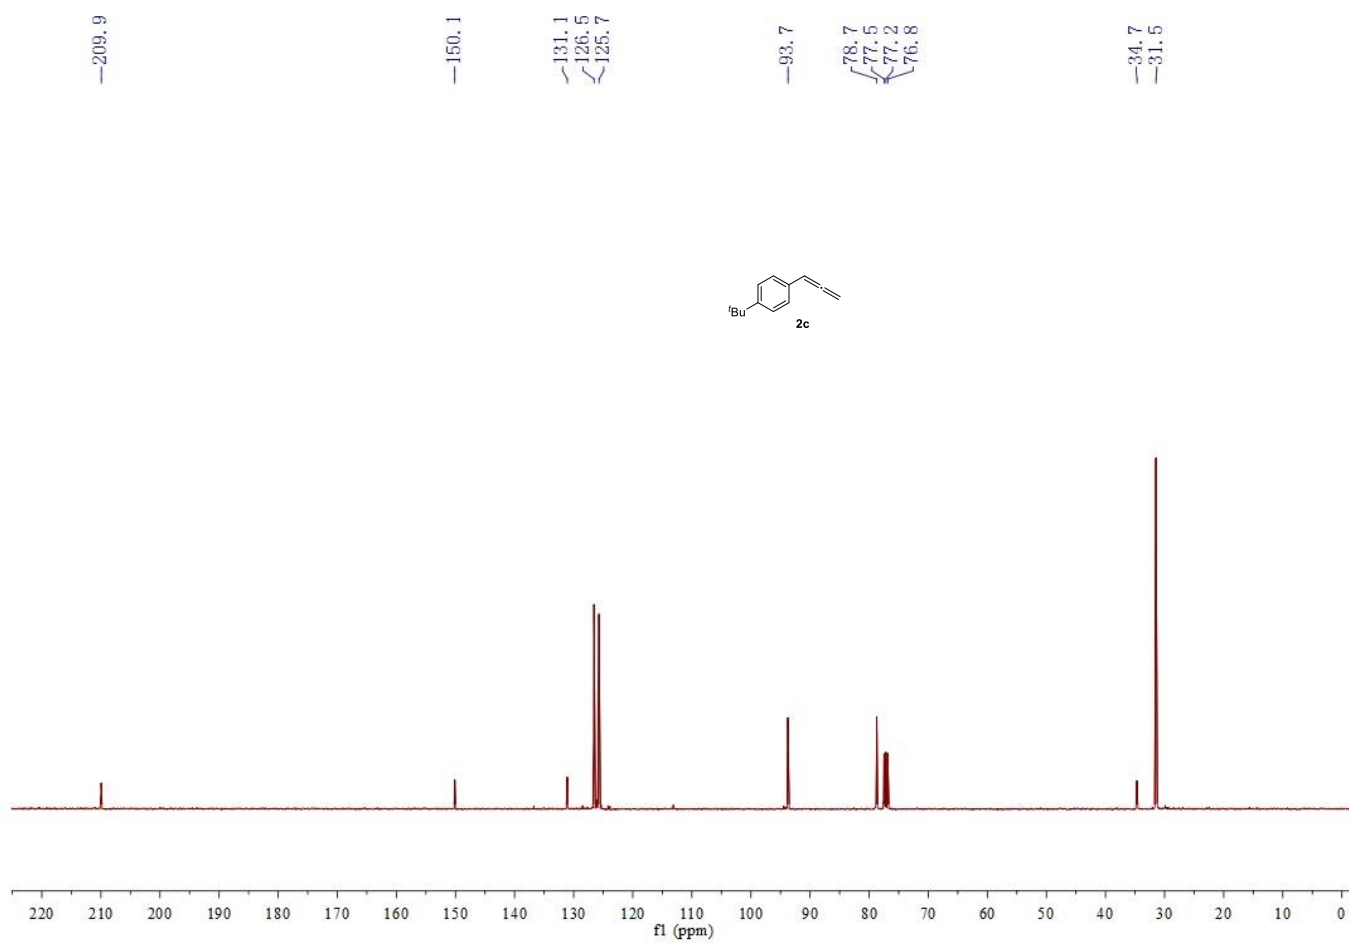



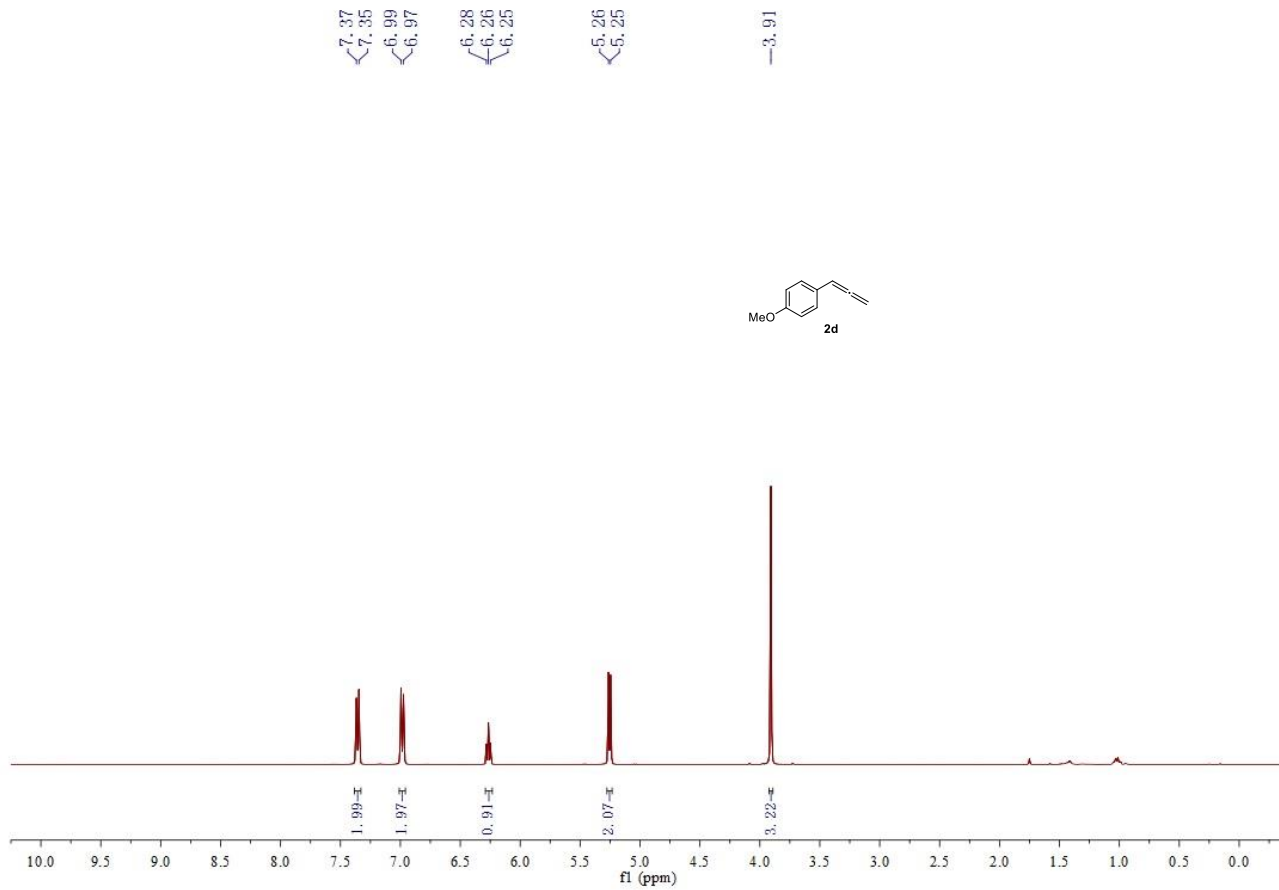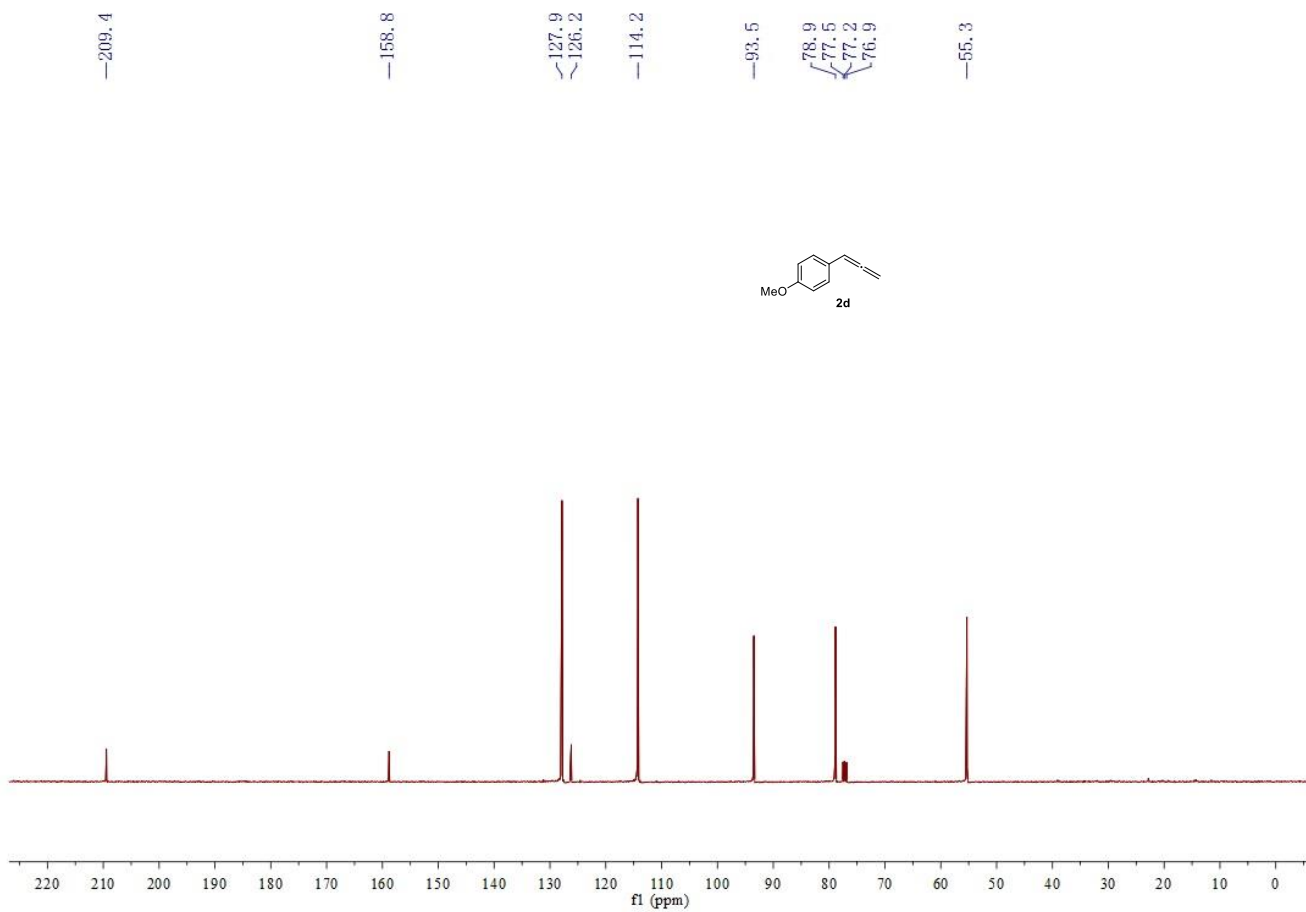

7.33  
7.32  
7.31  
7.30  
7.08  
7.06  
7.04  
6.21  
6.20  
6.18  
5.22  
5.20

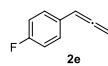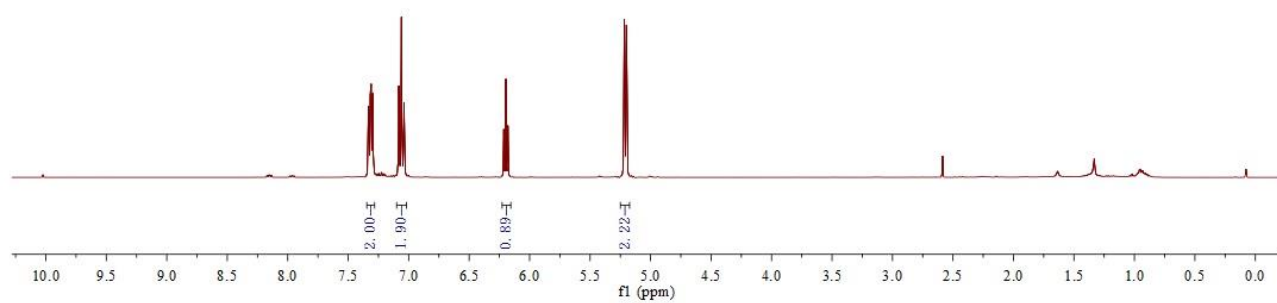

209.7

163.2  
160.8

128.3  
128.2

115.8  
115.6

93.2

79.1  
77.5  
77.2  
76.8

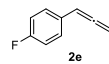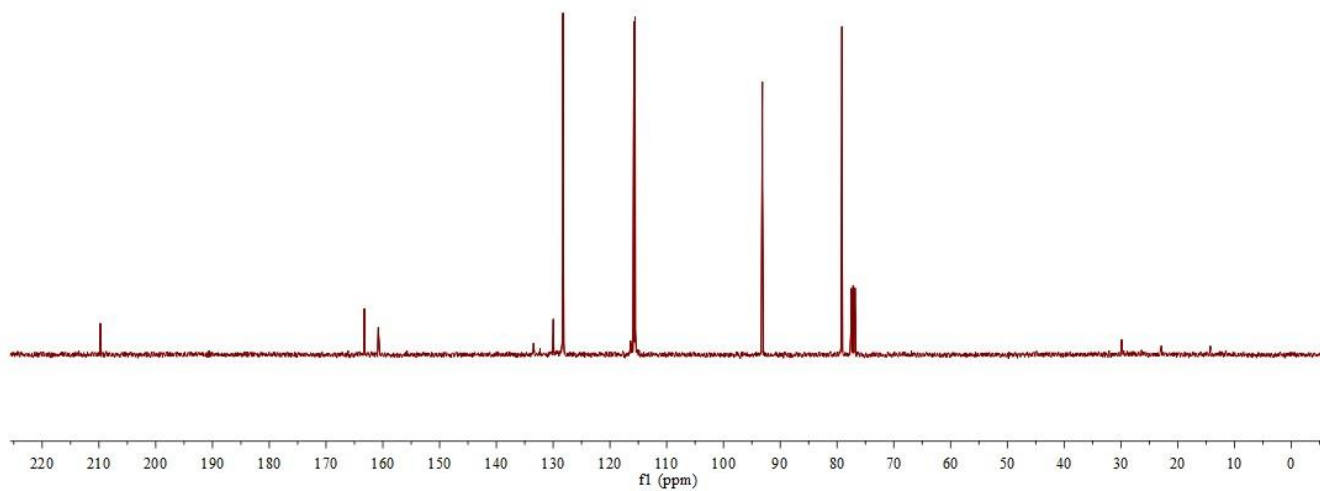

7.30  
7.30  
7.29  
7.28  
7.28  
7.24  
7.22

6.16  
6.14  
6.13

5.19  
5.17

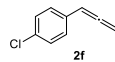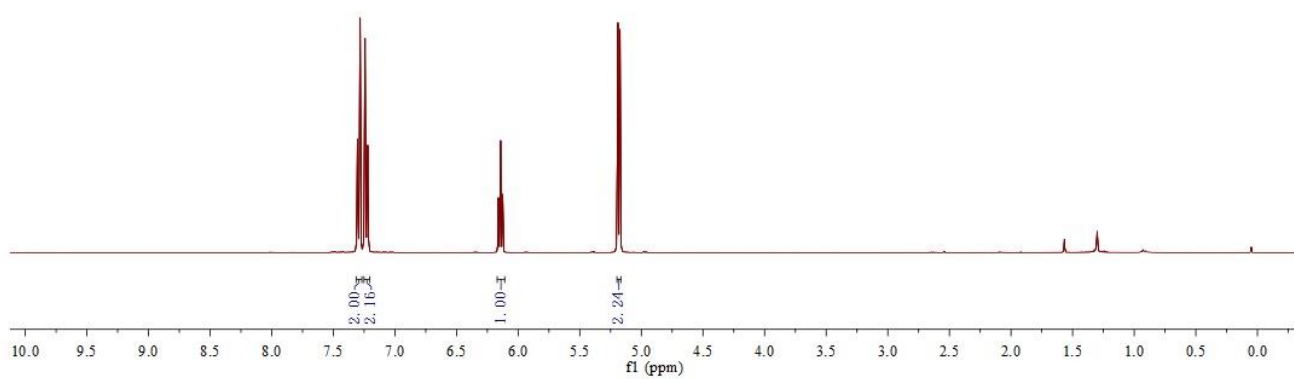

209.9

132.6  
132.6  
128.9  
128.0

93.3  
79.3  
77.5  
77.2  
76.8

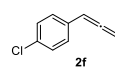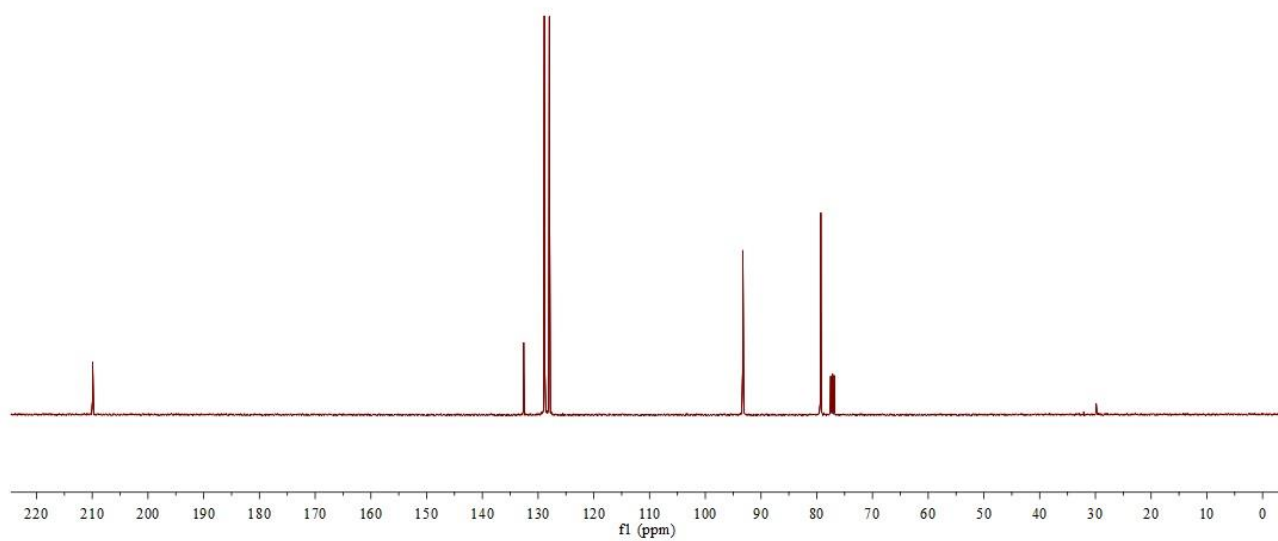

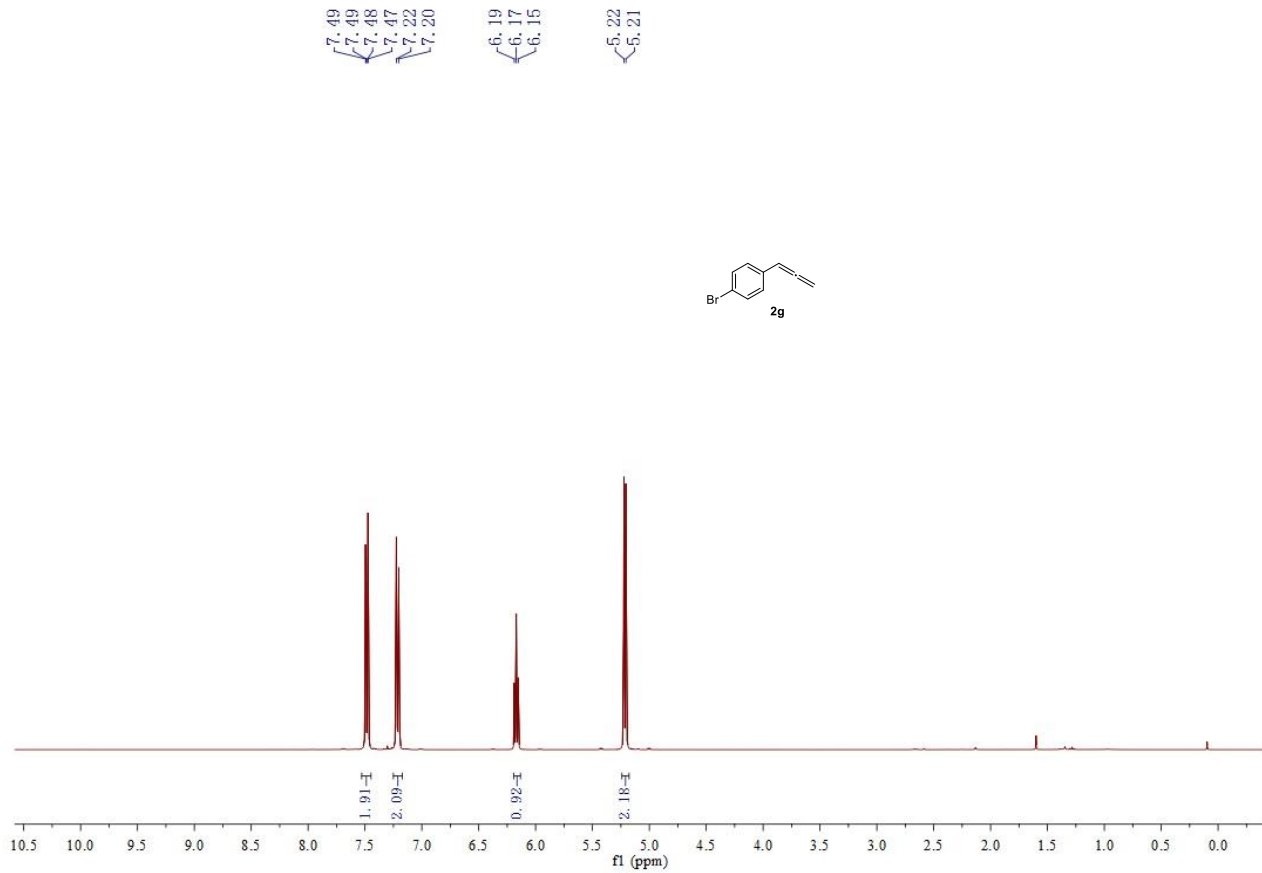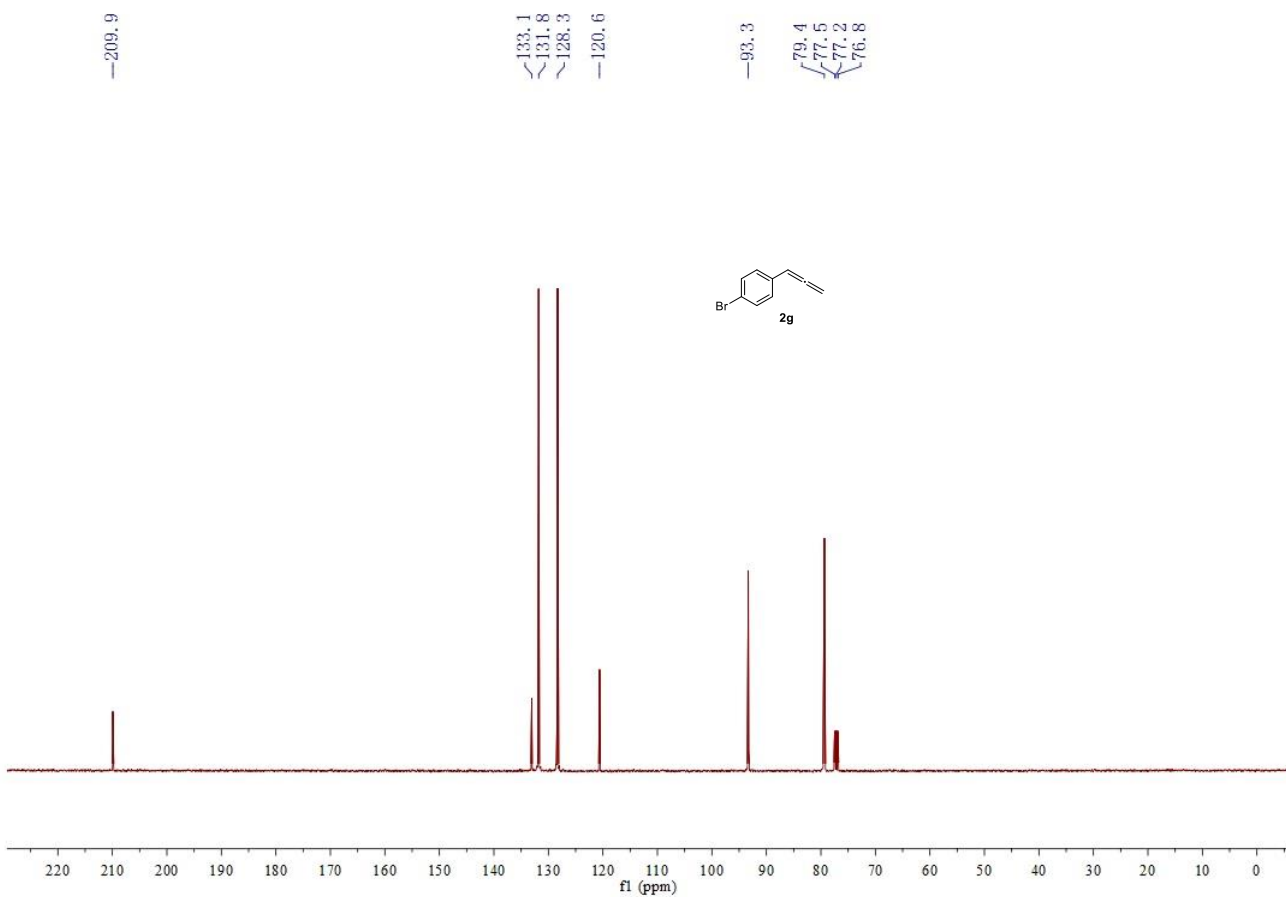

7.56  
7.54  
7.40  
7.38  
7.26

6.21  
6.20  
6.18

5.23  
5.21

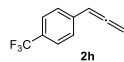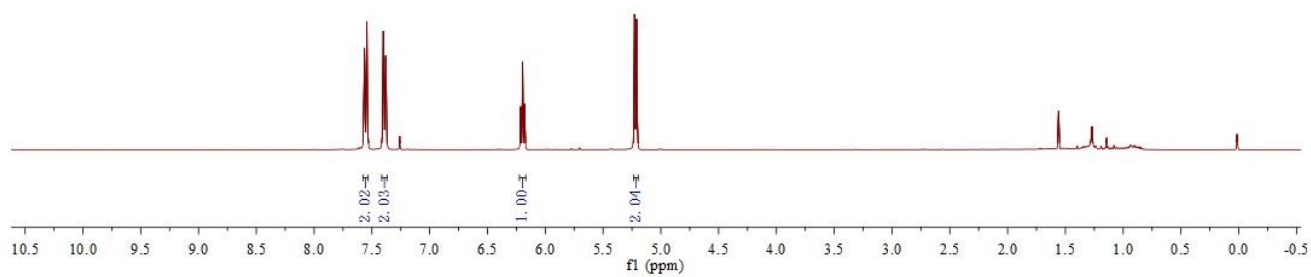

-210.6

138.1  
129.4  
129.1  
128.8  
128.4  
126.9  
126.7  
125.7  
123.0

93.4

79.5  
77.5  
77.2  
76.8

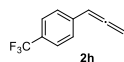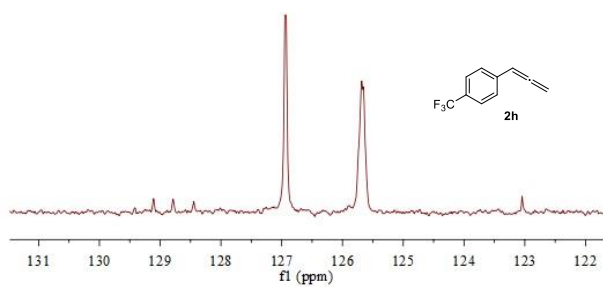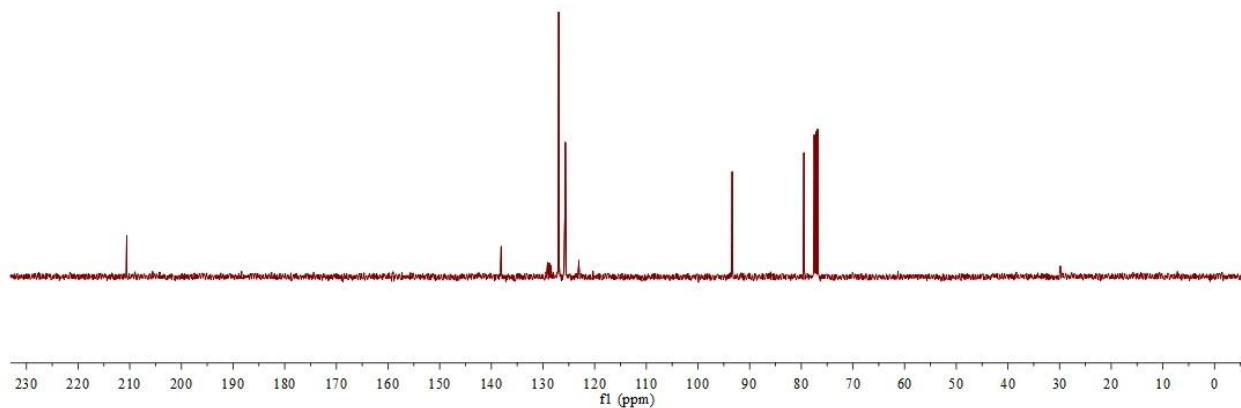

7.61  
7.59  
7.57  
7.55  
7.46  
7.45  
7.43  
7.39  
7.37  
7.37  
7.35  
7.33  
7.26  
6.24  
6.22  
6.21

5.20  
5.19

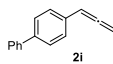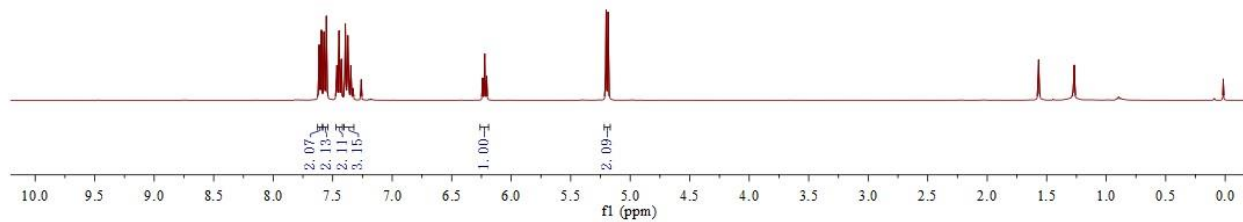

210.0

140.8  
139.7  
128.8  
127.3  
127.2  
127.1  
126.9

93.6

78.9  
77.4  
77.0  
76.7

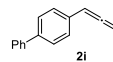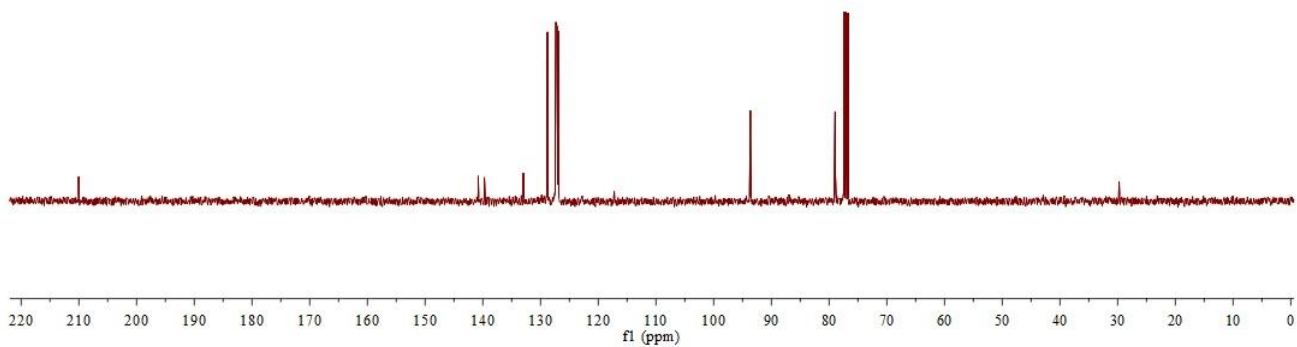

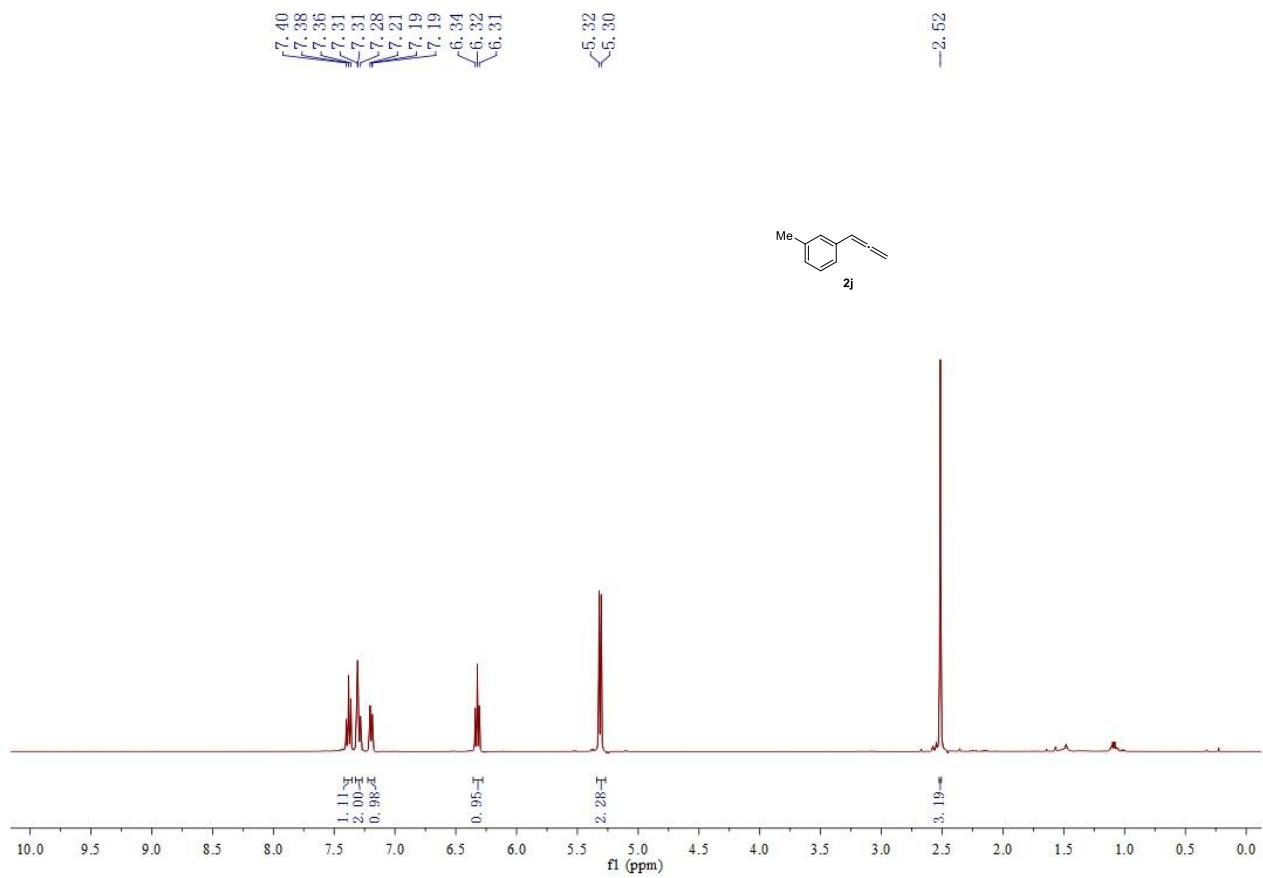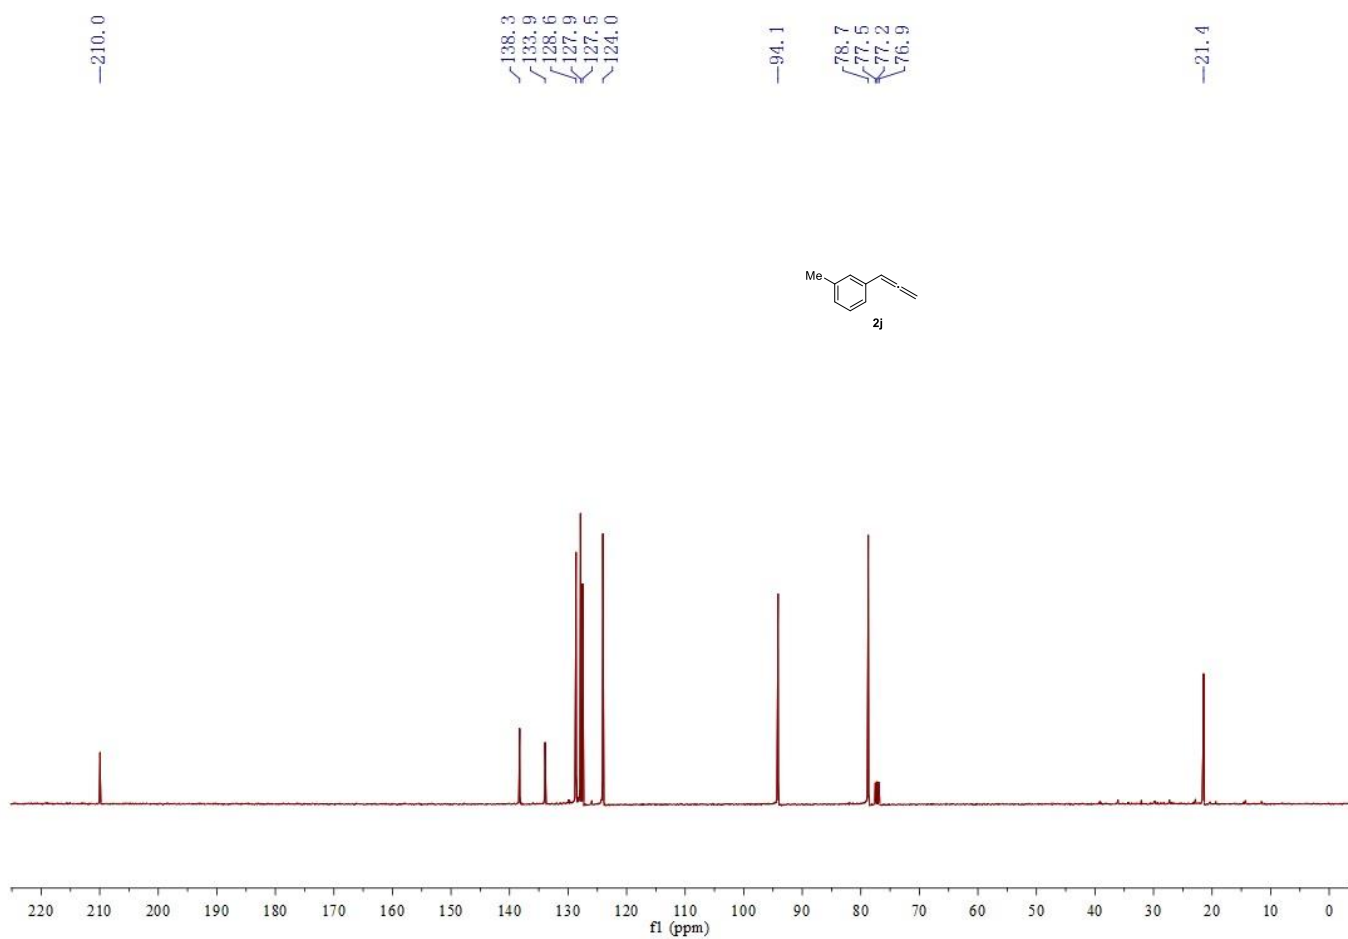

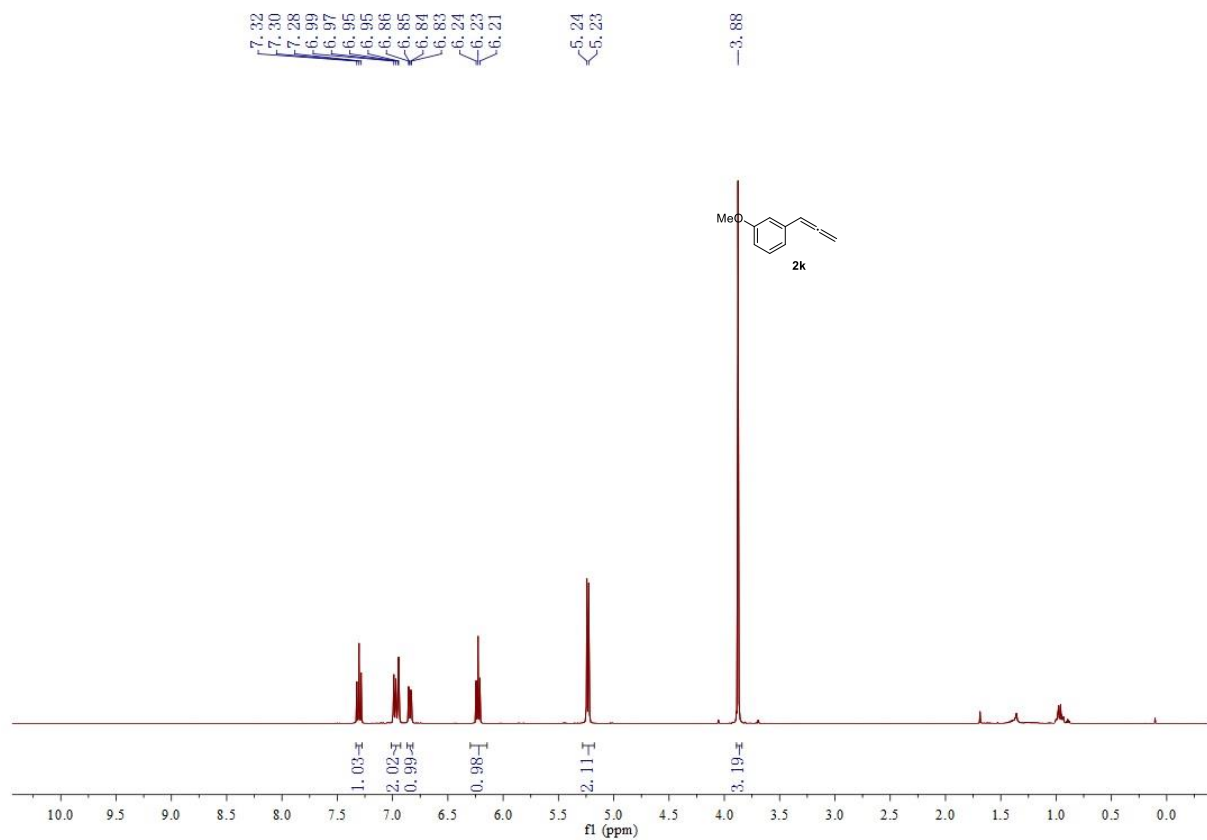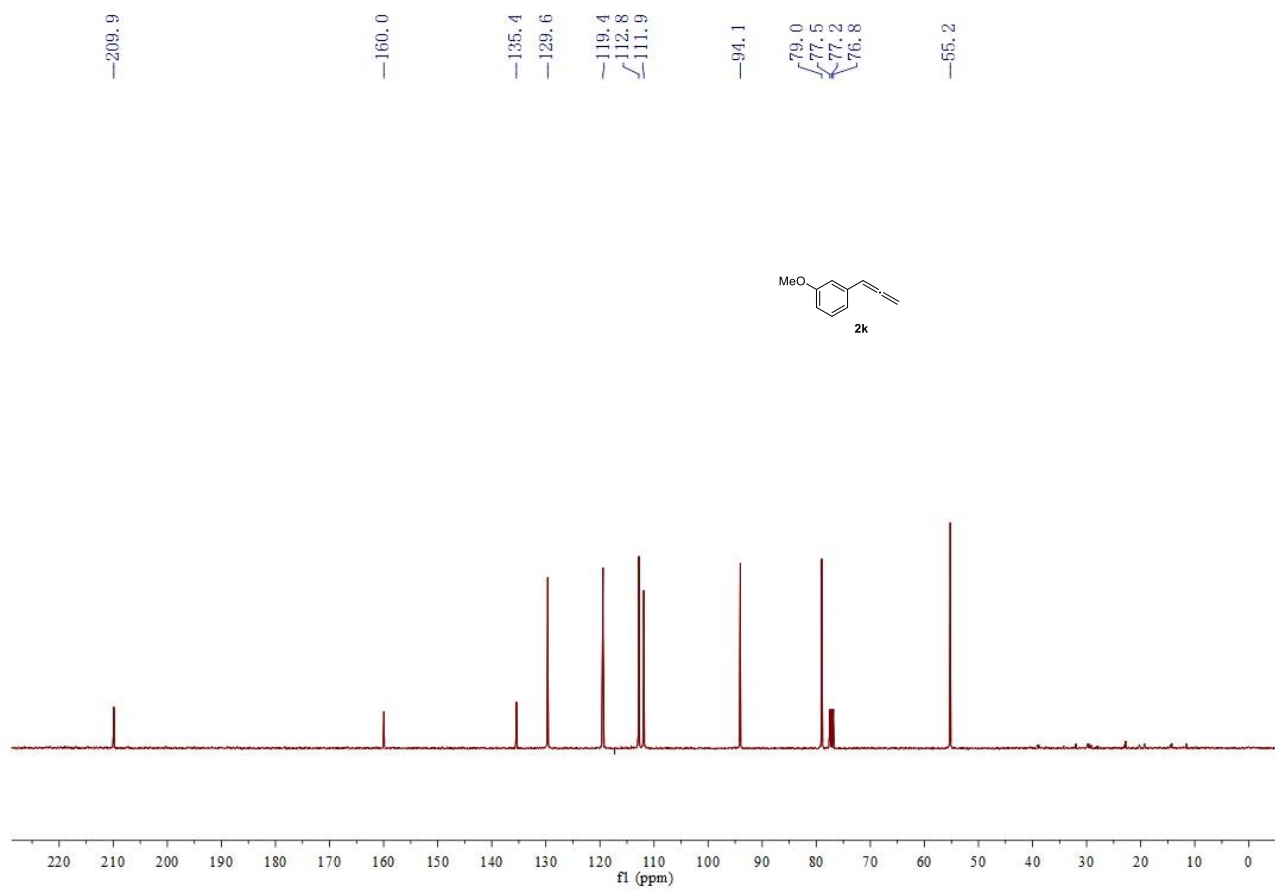



7.34  
7.32  
7.31  
7.29  
7.13  
7.11  
7.09  
7.07  
6.98  
6.96  
6.93  
6.22  
6.20  
6.18  
5.25  
5.23

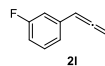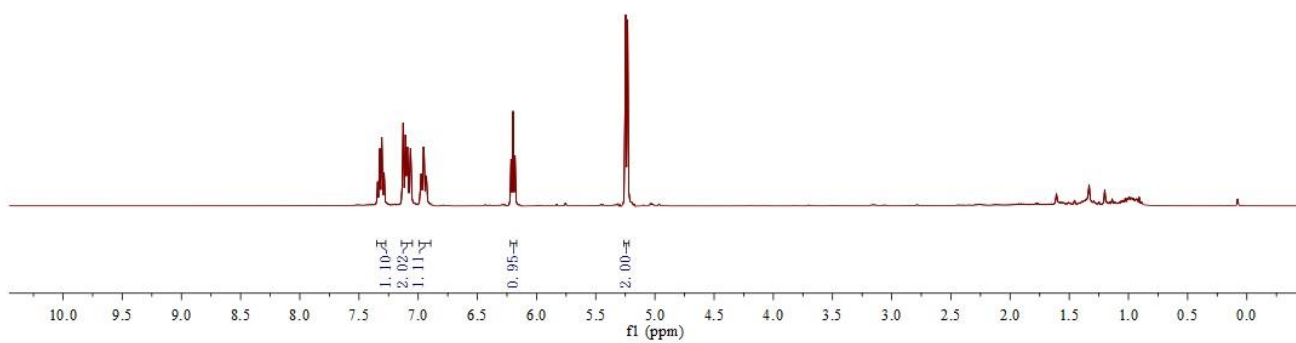

210.1

164.5  
162.1

135.6  
135.6  
130.1  
130.1  
122.6  
122.6  
114.0  
113.8  
113.5  
113.2

93.5  
93.5  
79.4  
77.5  
77.2  
76.8

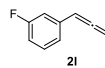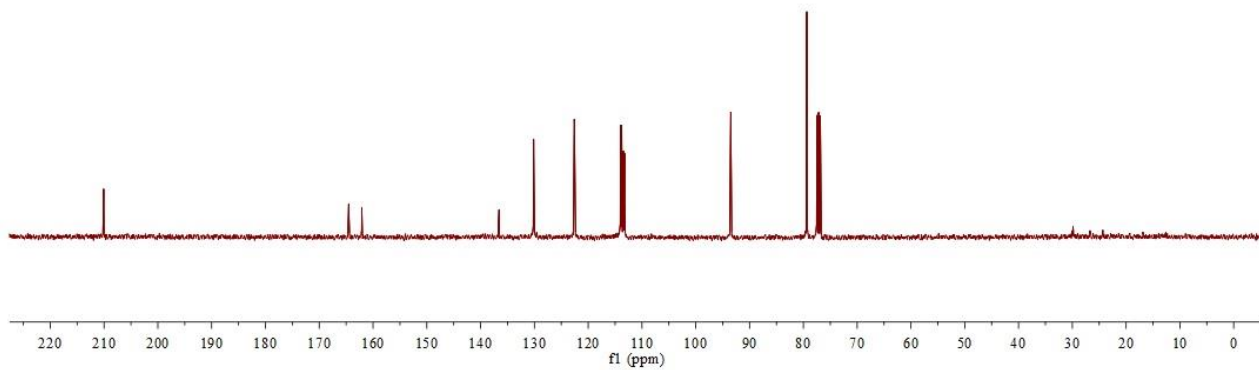

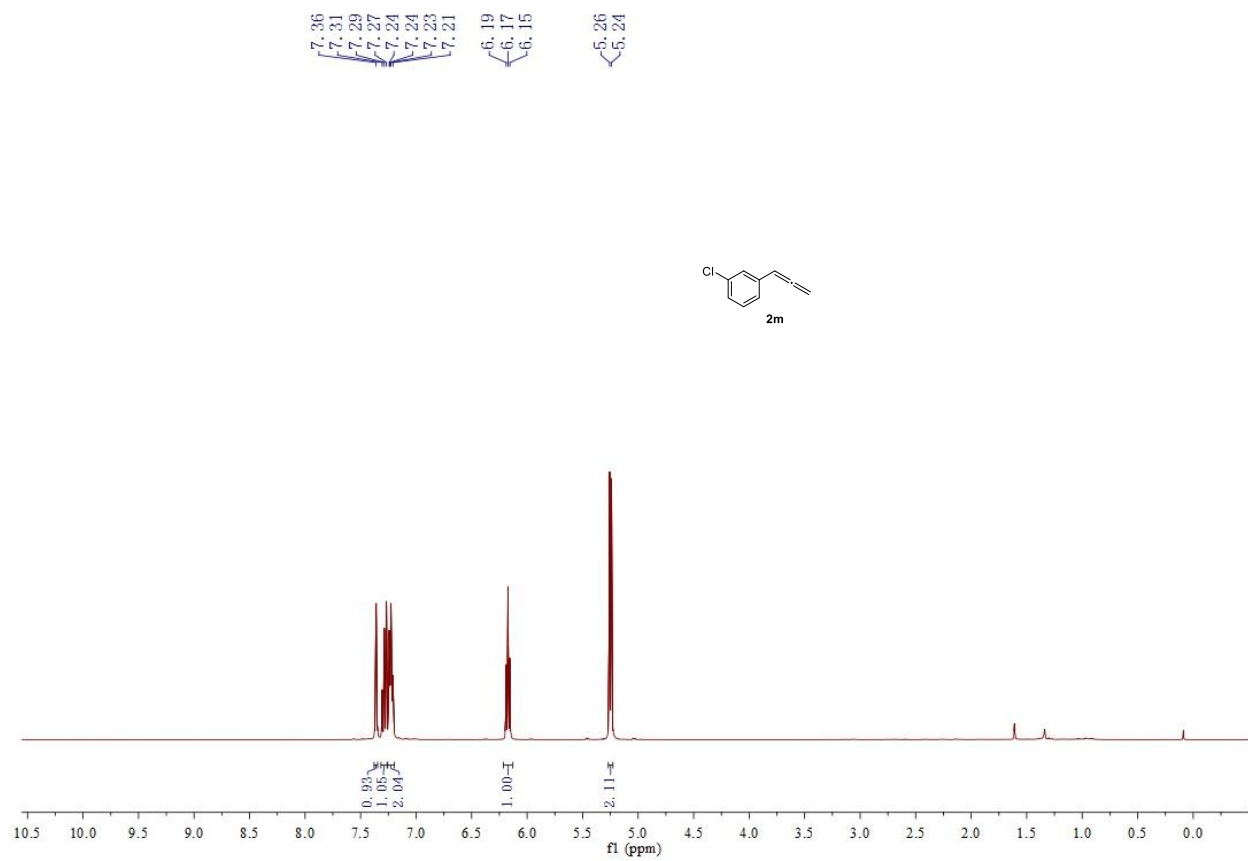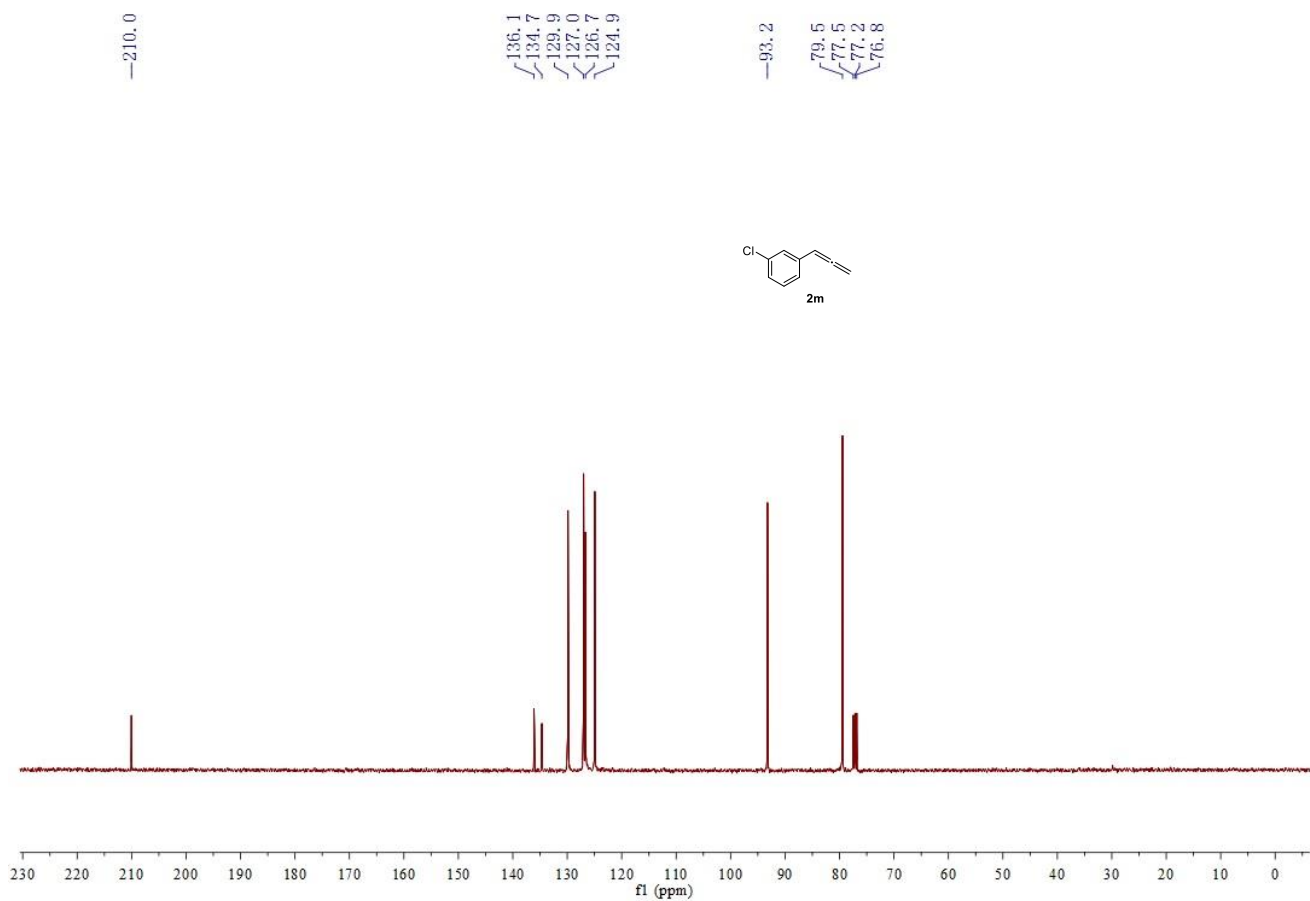

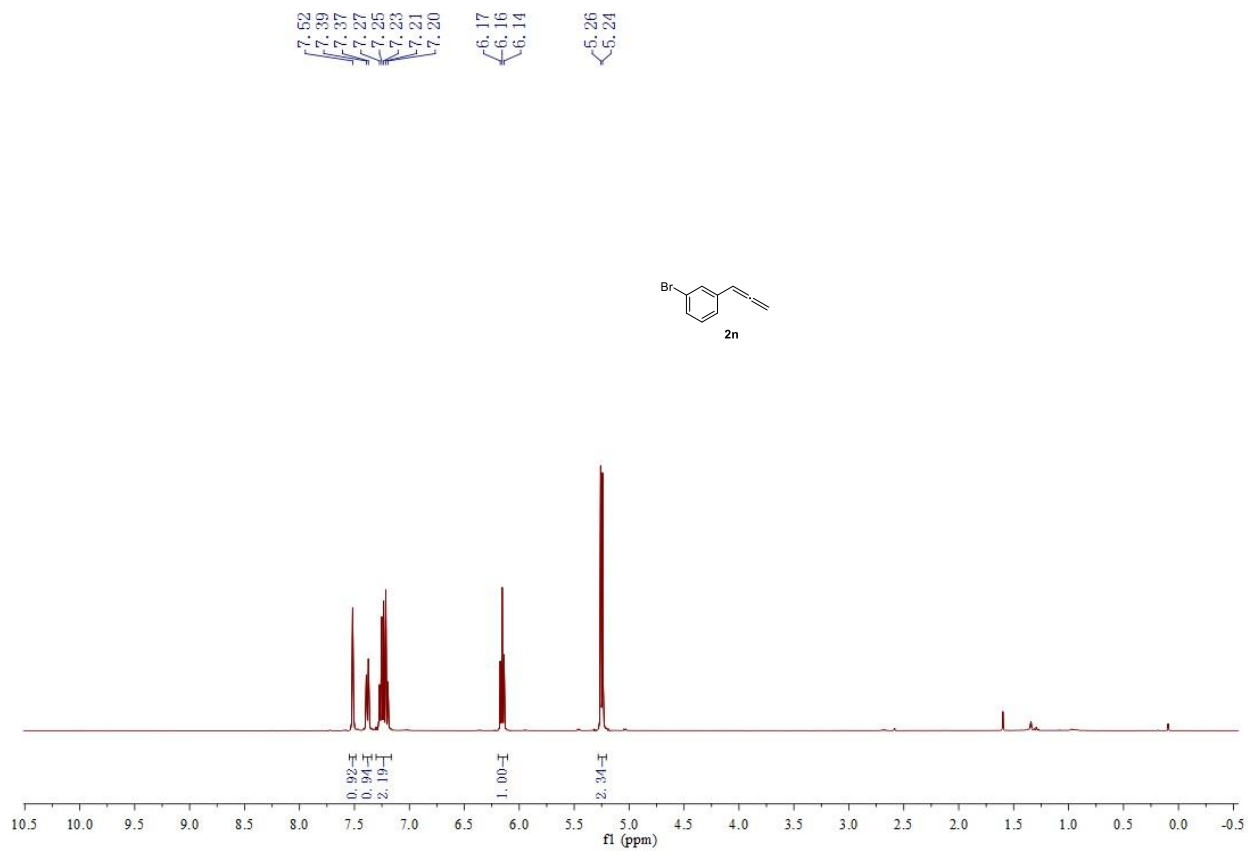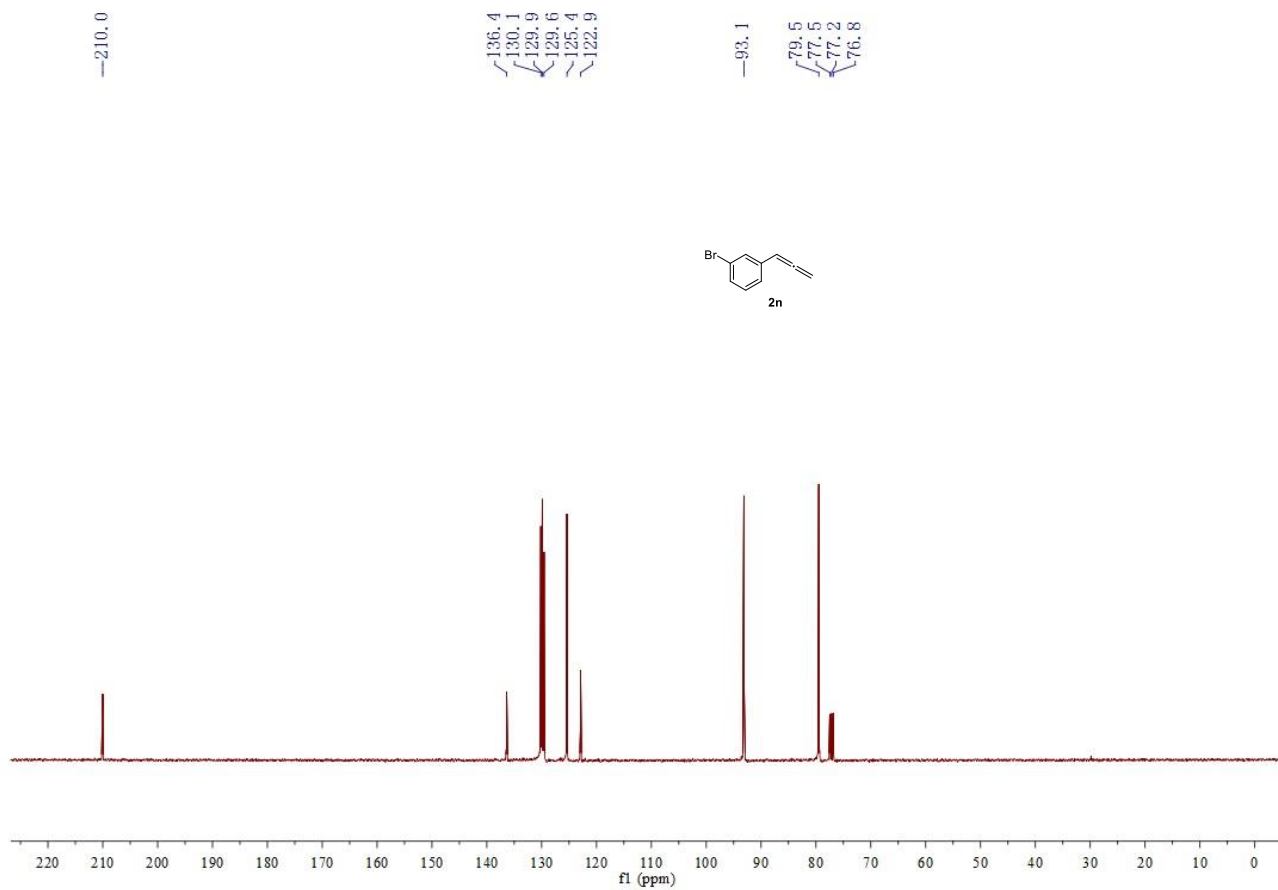

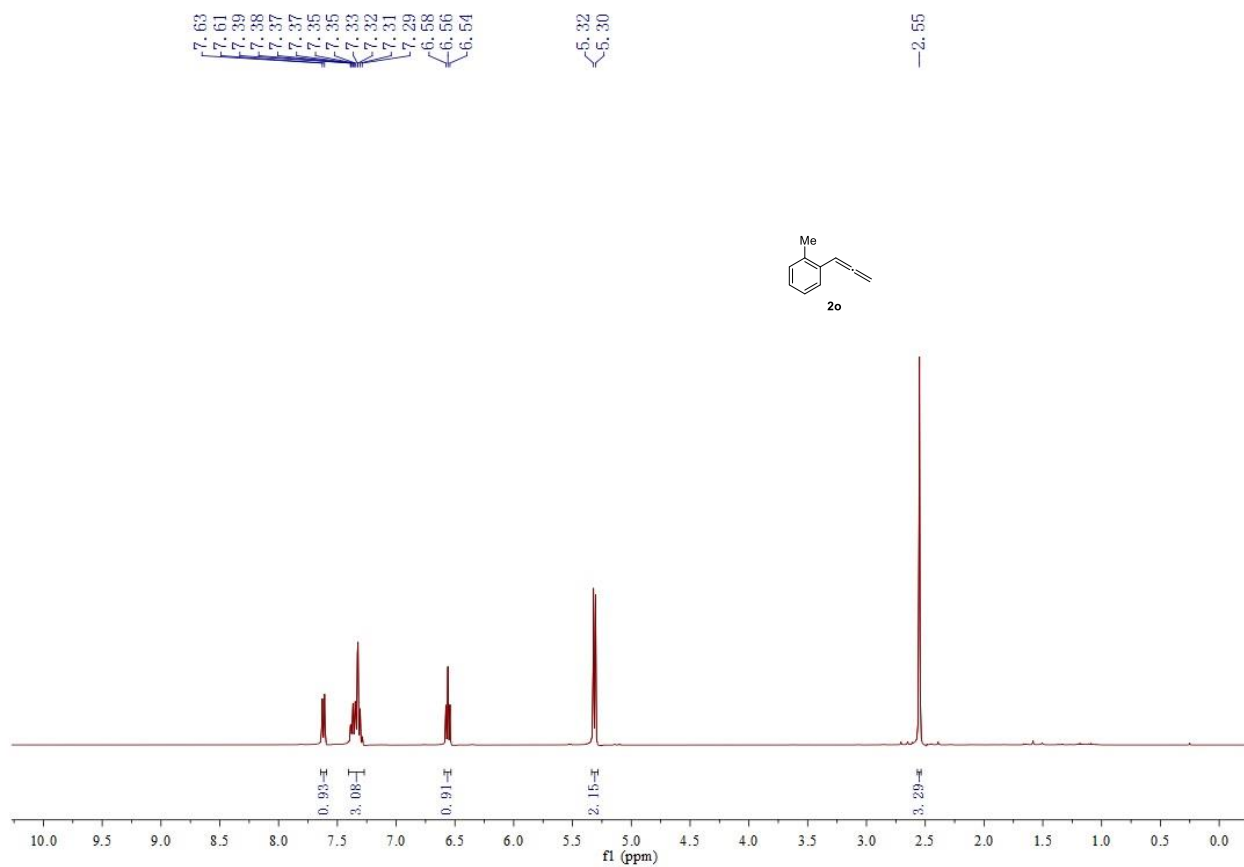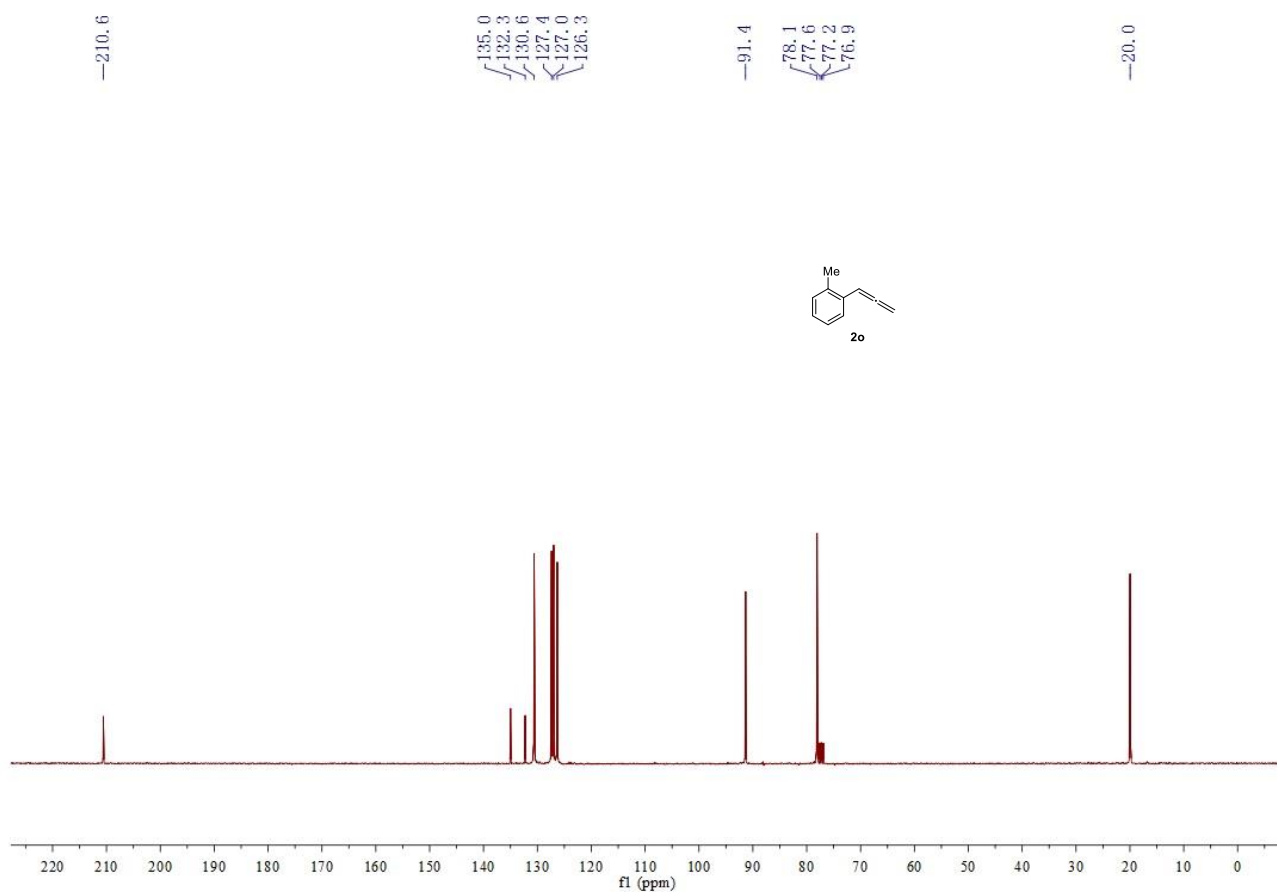

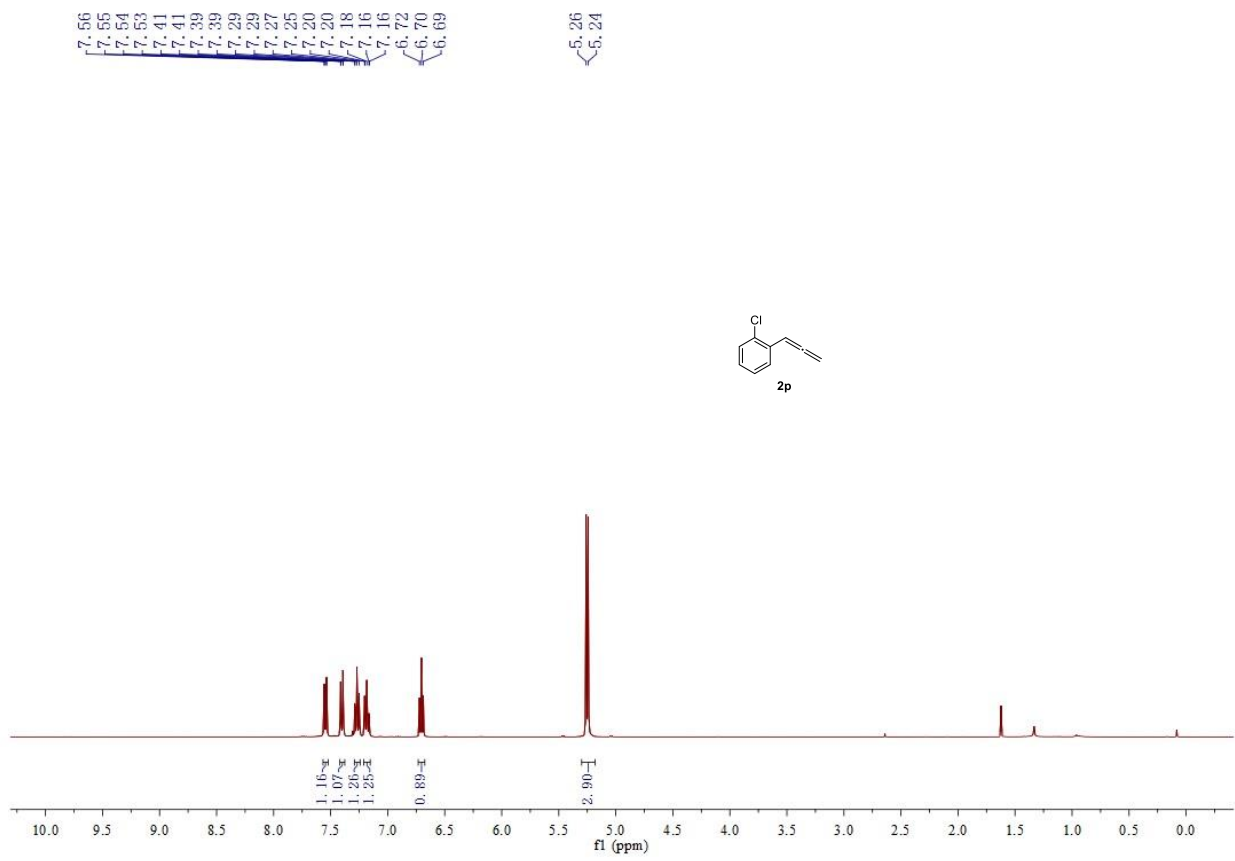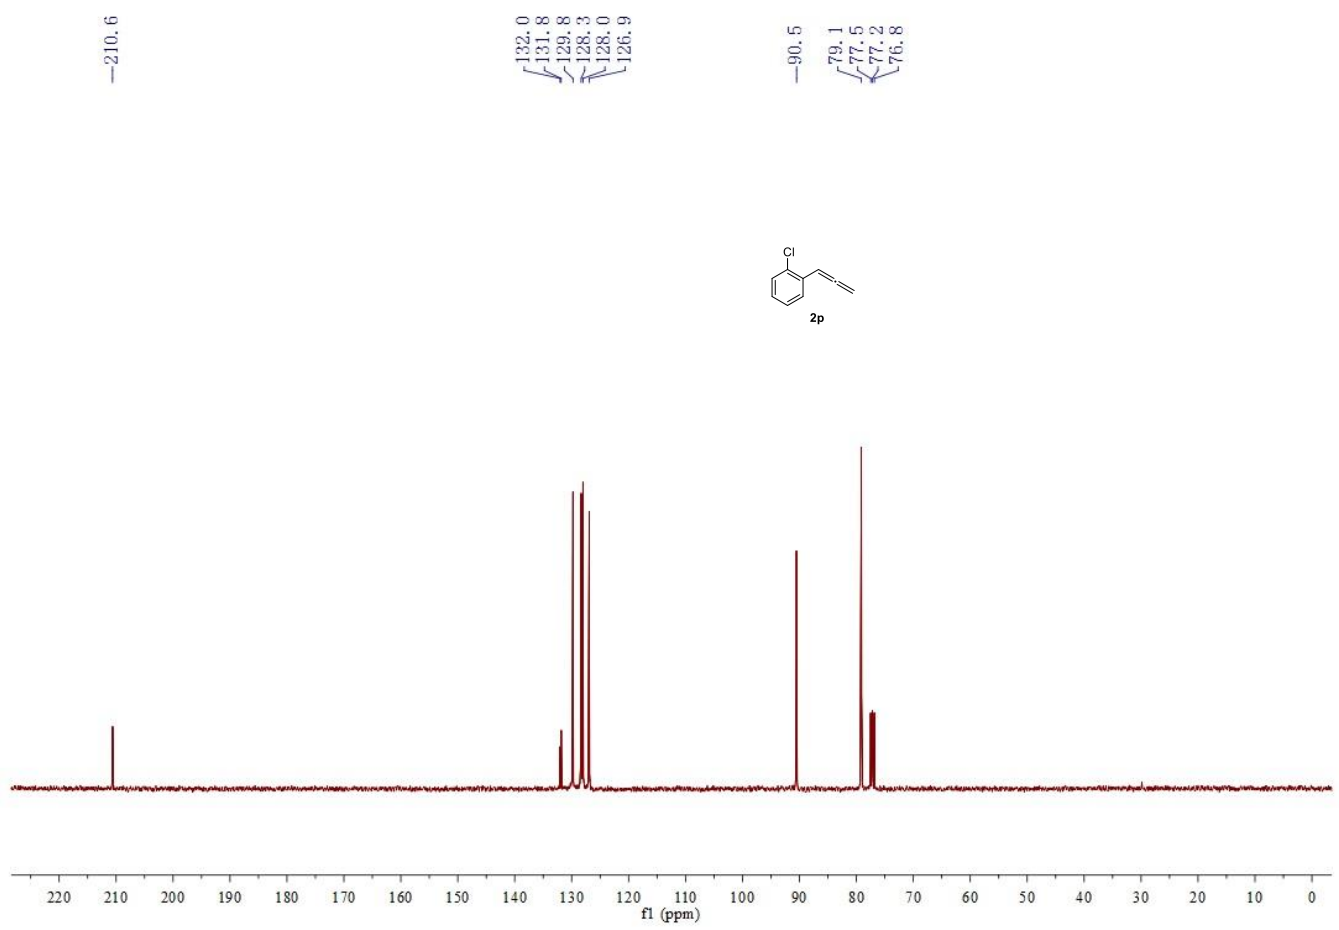

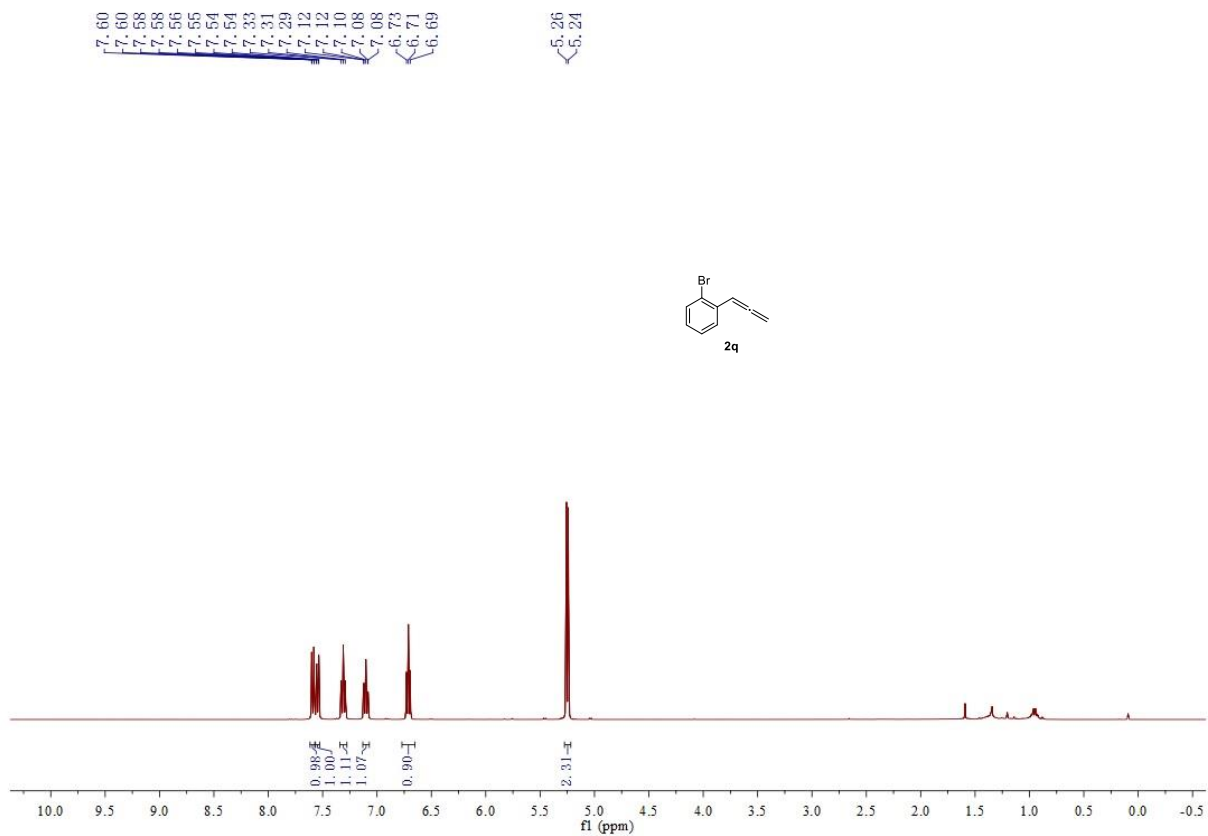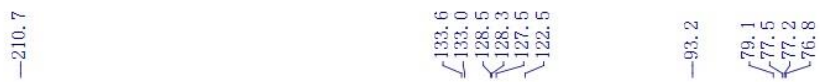

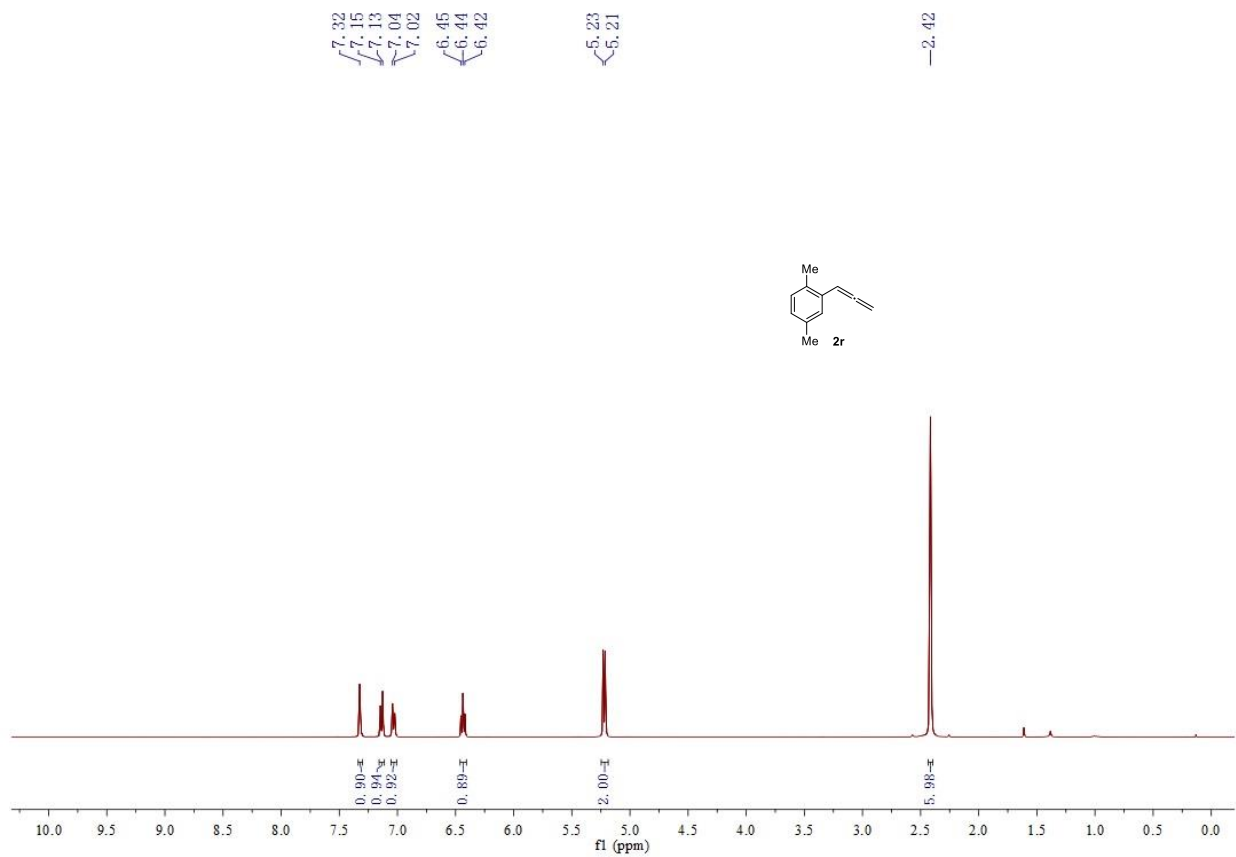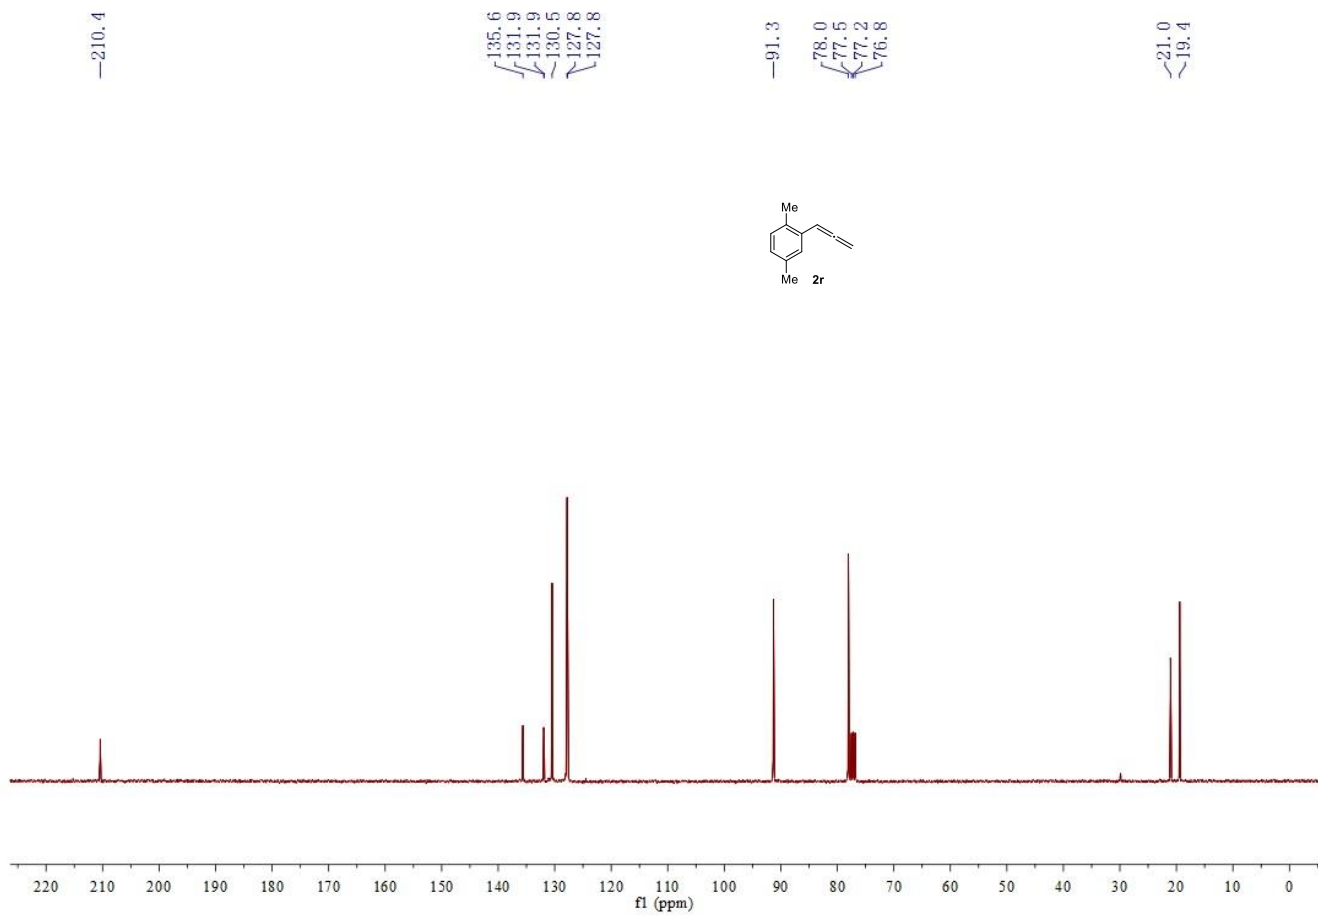

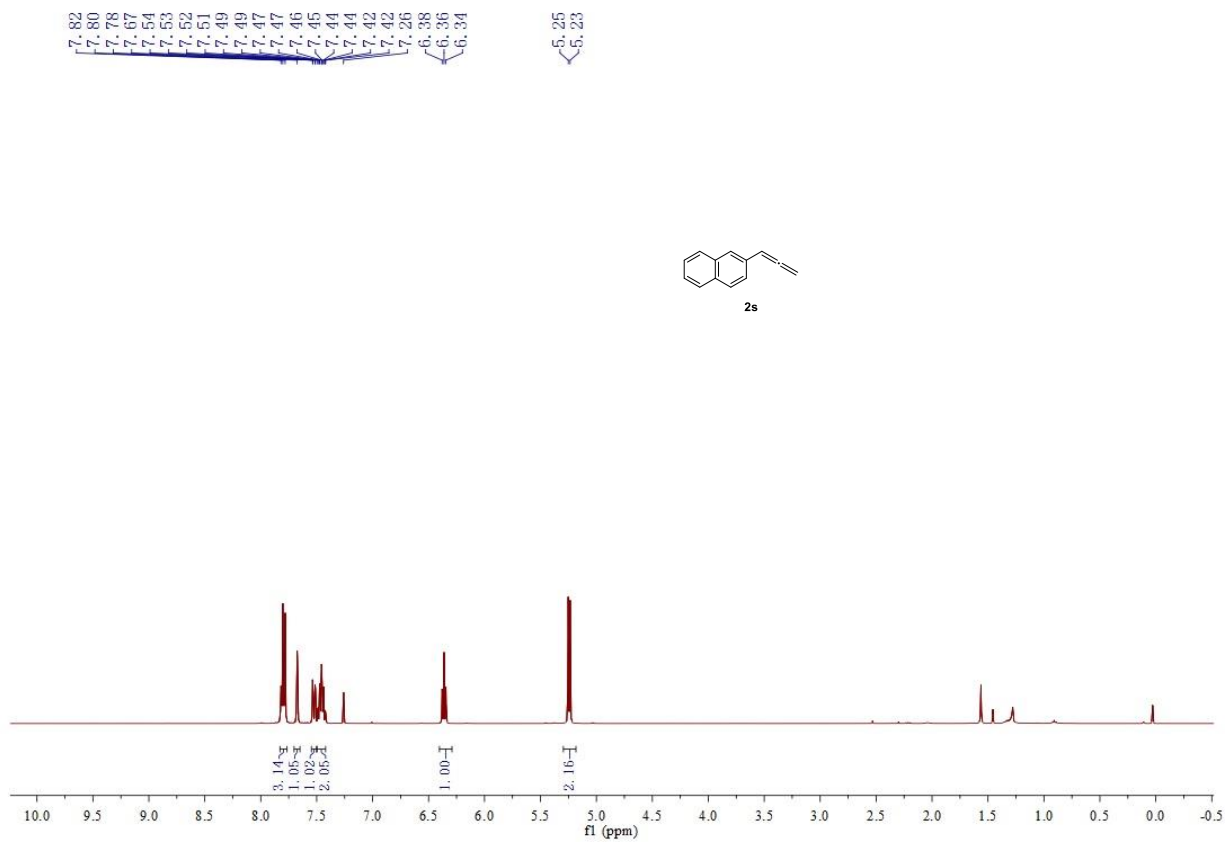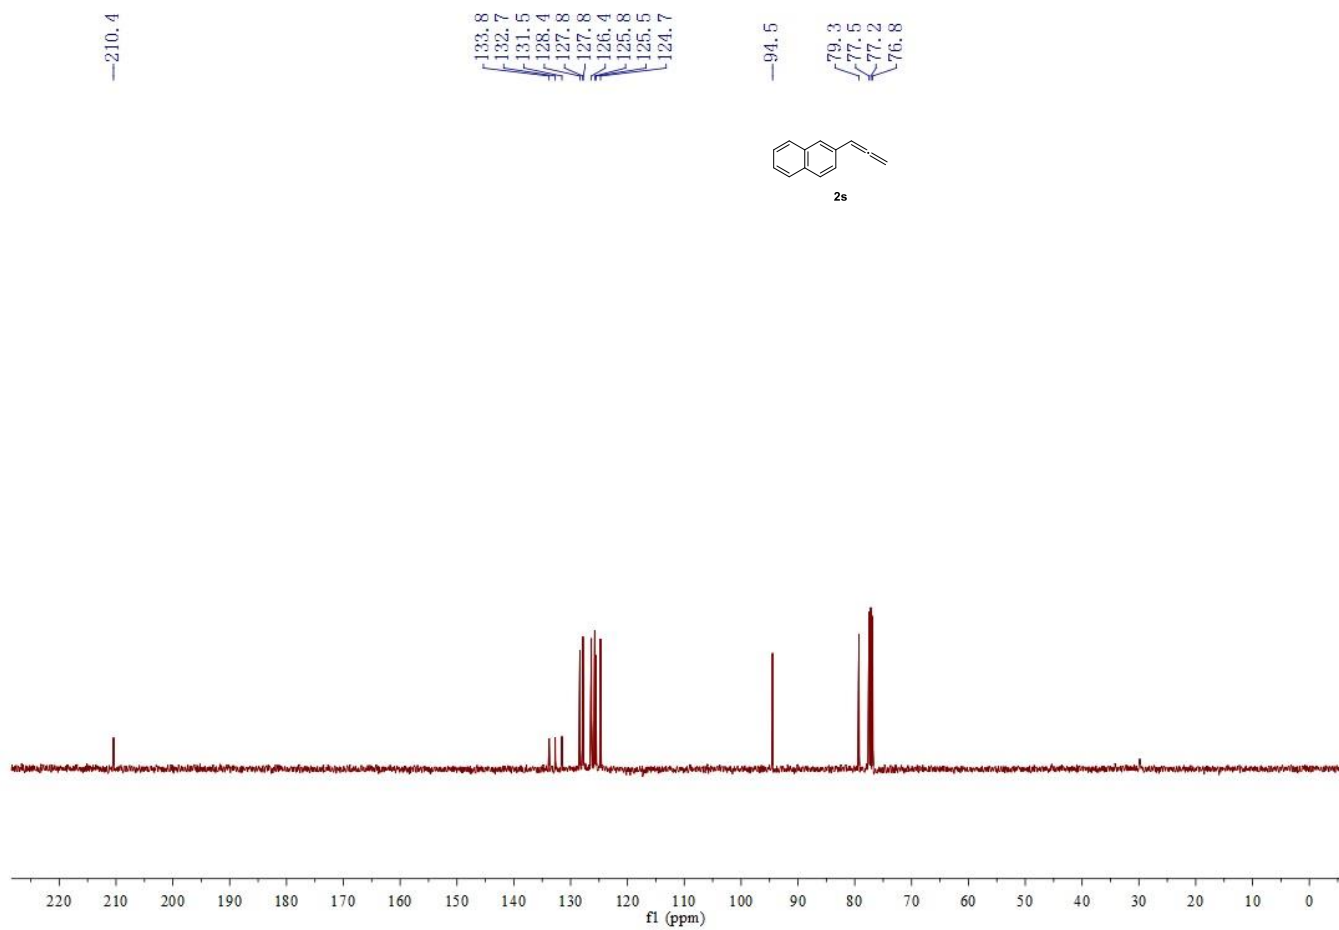



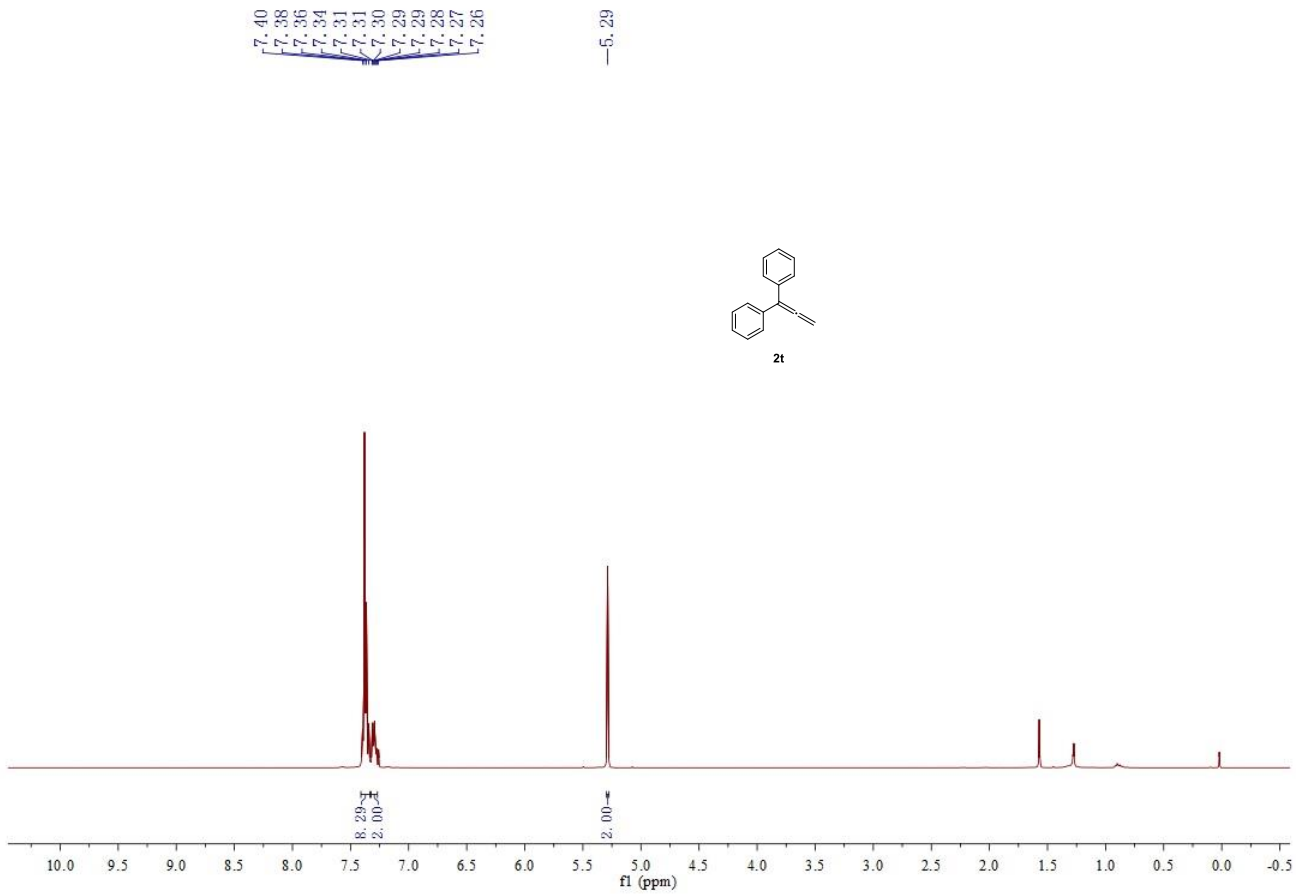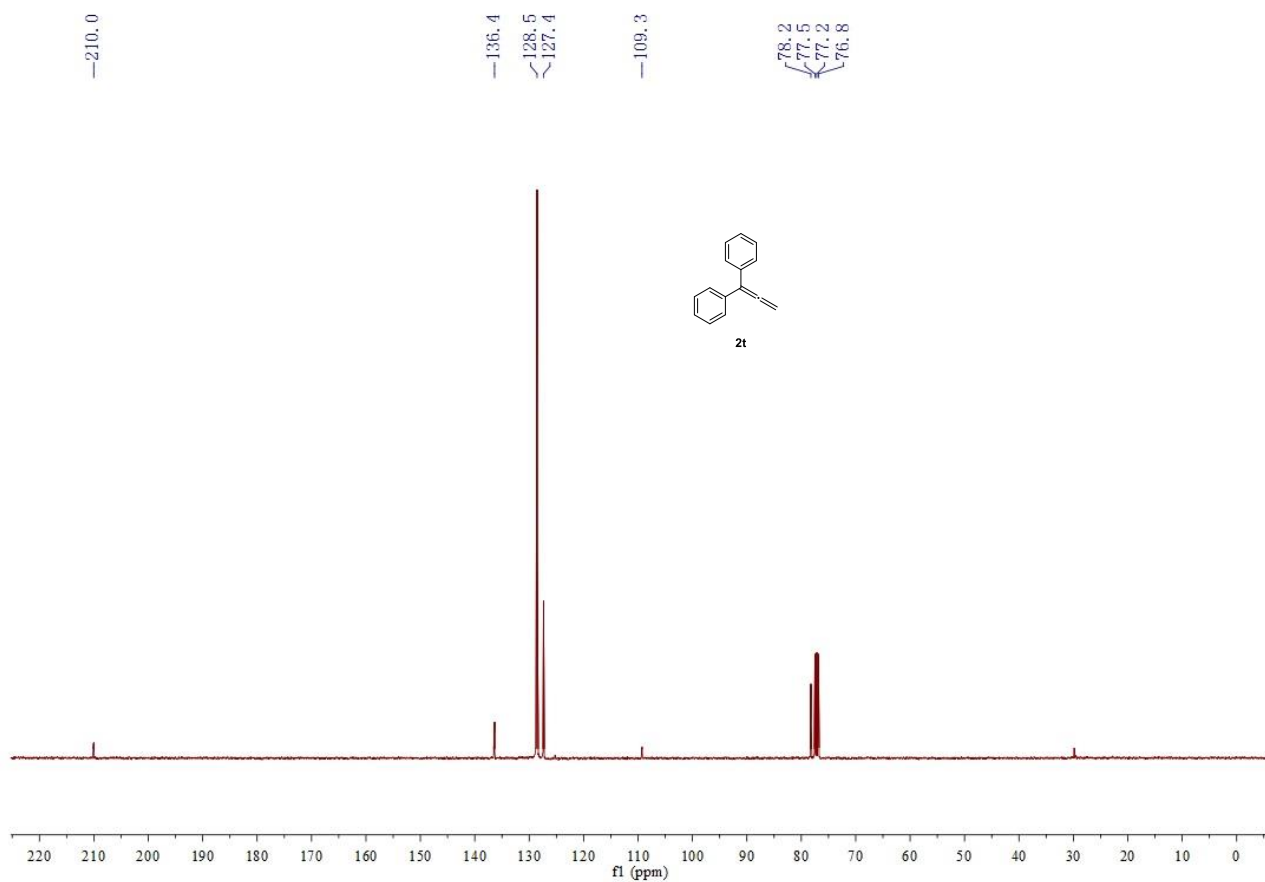

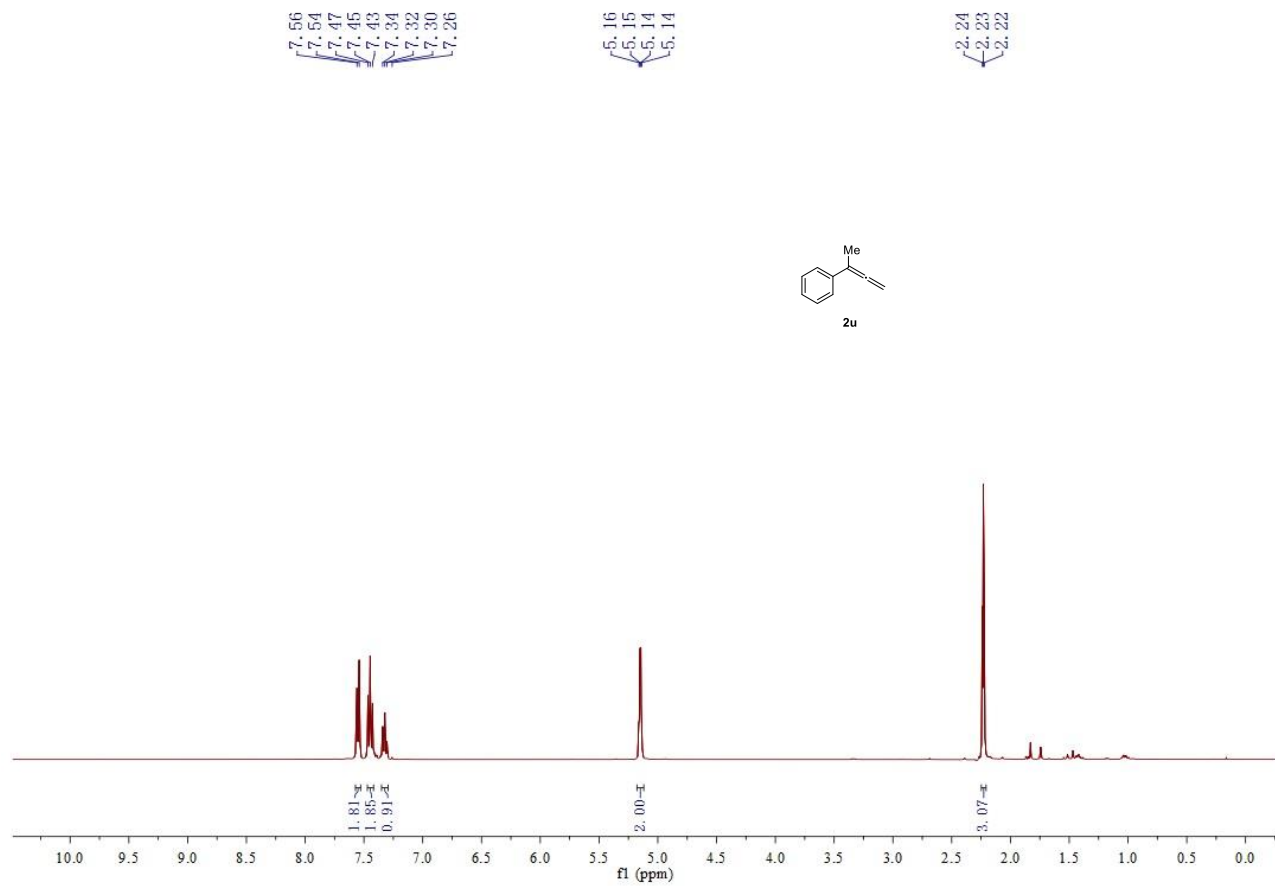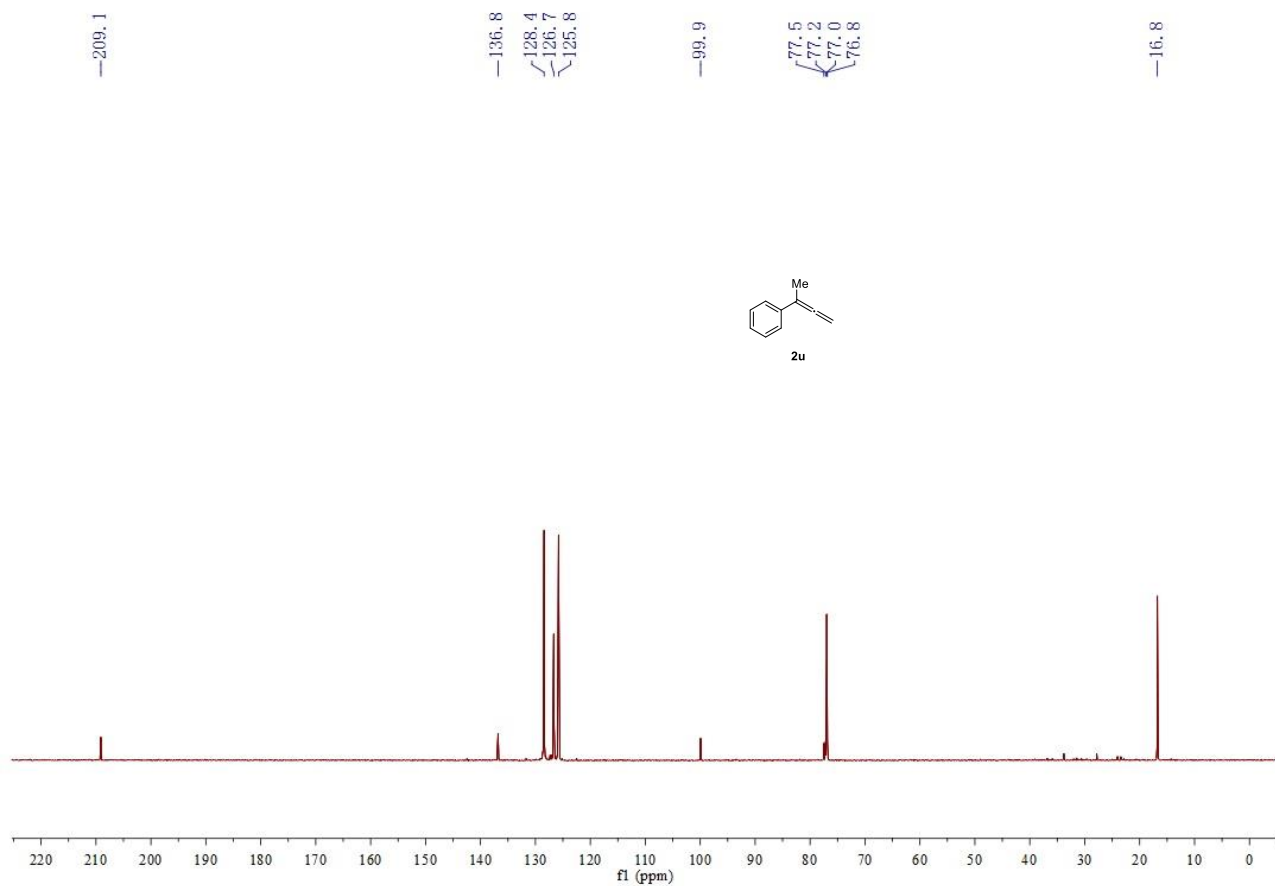

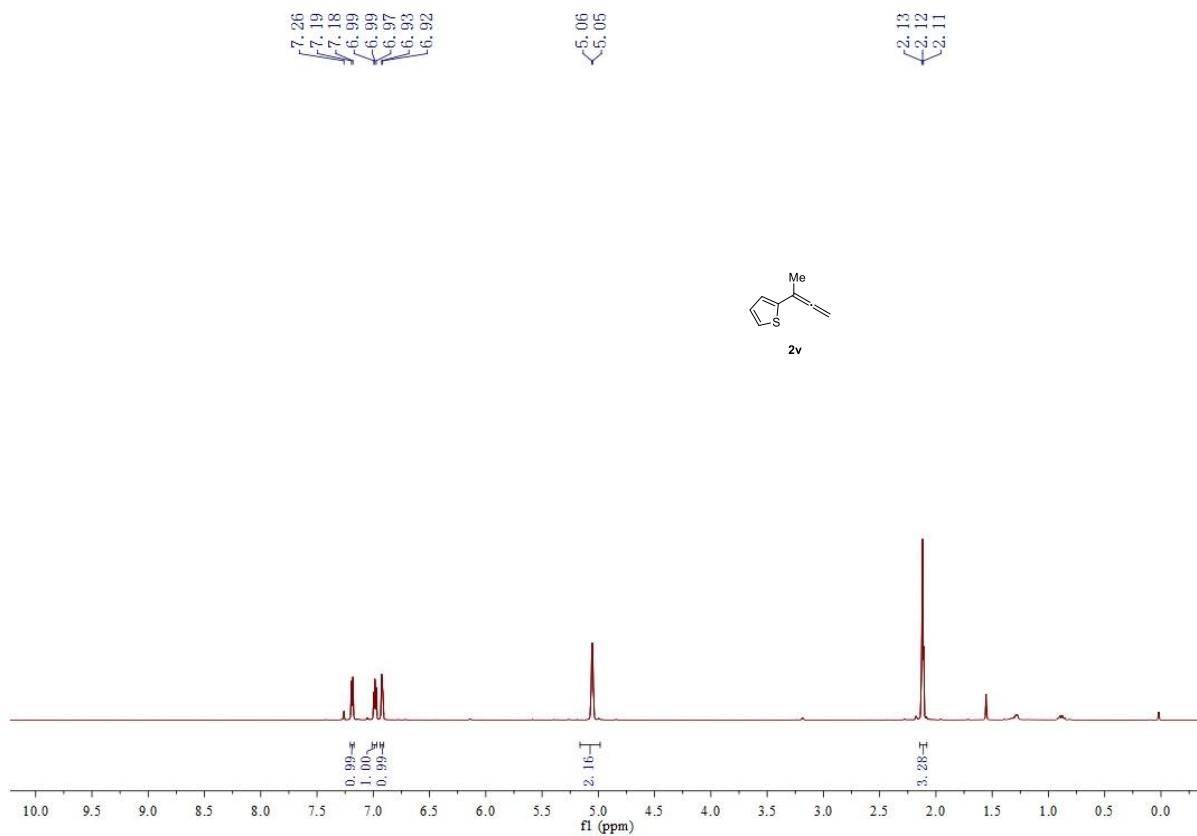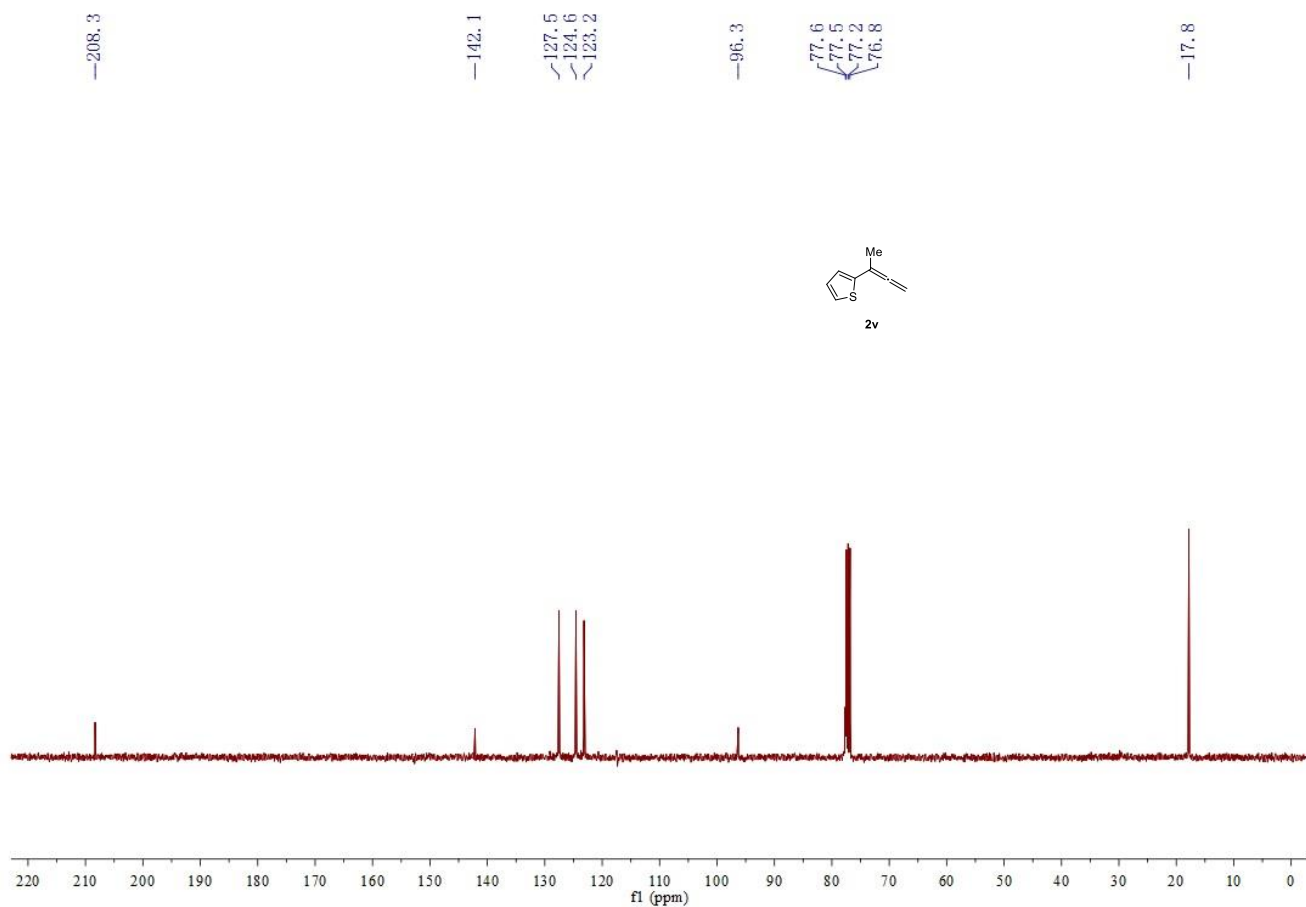

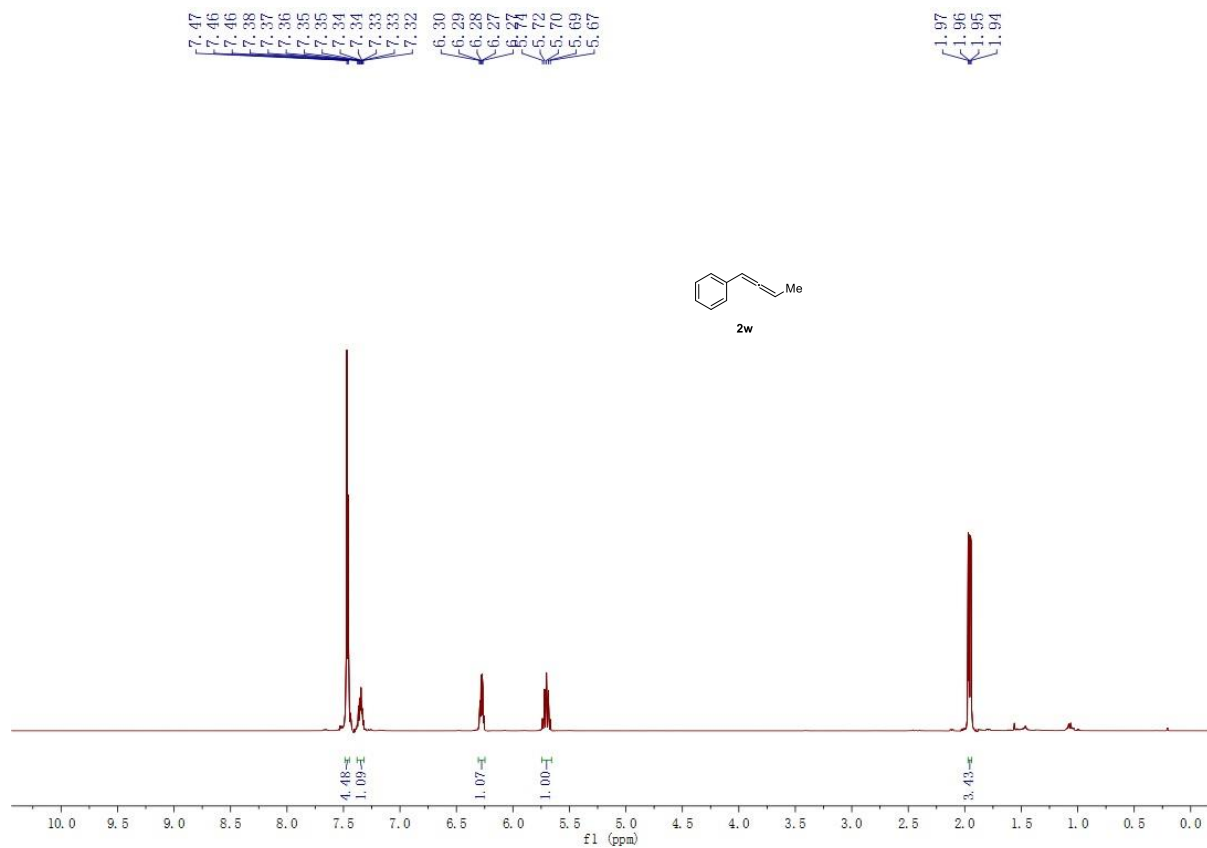

—206.1

—135.2  
—128.7  
—126.8

—94.2  
—89.7  
77.5  
77.2  
76.9

—14.2

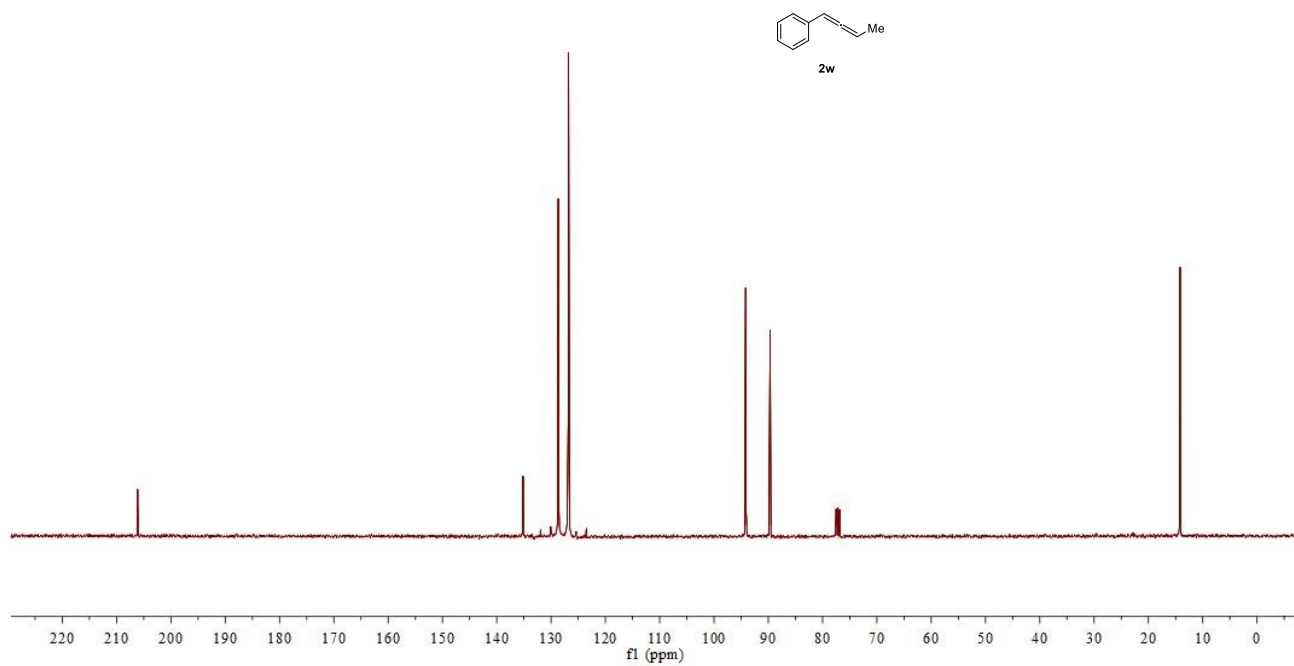

8.38  
8.37  
7.97  
7.95  
7.77  
7.75  
7.63  
7.60  
7.58  
7.51  
7.49  
7.44  
7.42  
7.39  
7.37  
7.36  
7.36  
7.34  
7.32  
7.29  
5.48

-1.77

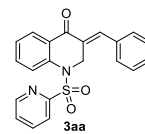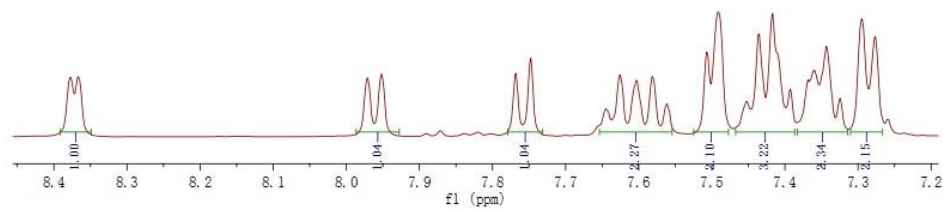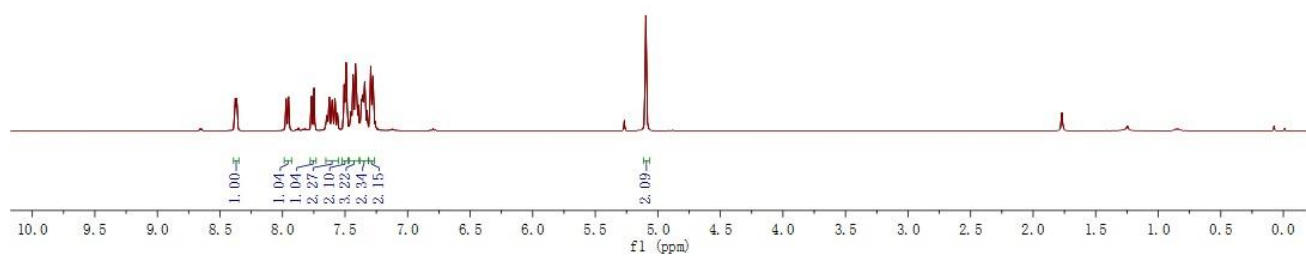

-183.0

-156.1

150.6  
138.0  
137.6  
134.2  
130.4  
130.0  
129.8  
128.9  
128.7  
128.3  
127.0  
126.9  
126.2  
122.8

77.5  
77.2  
76.8

-48.2

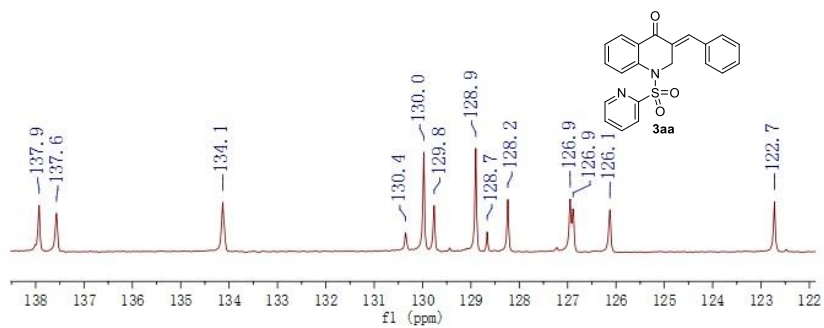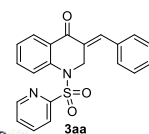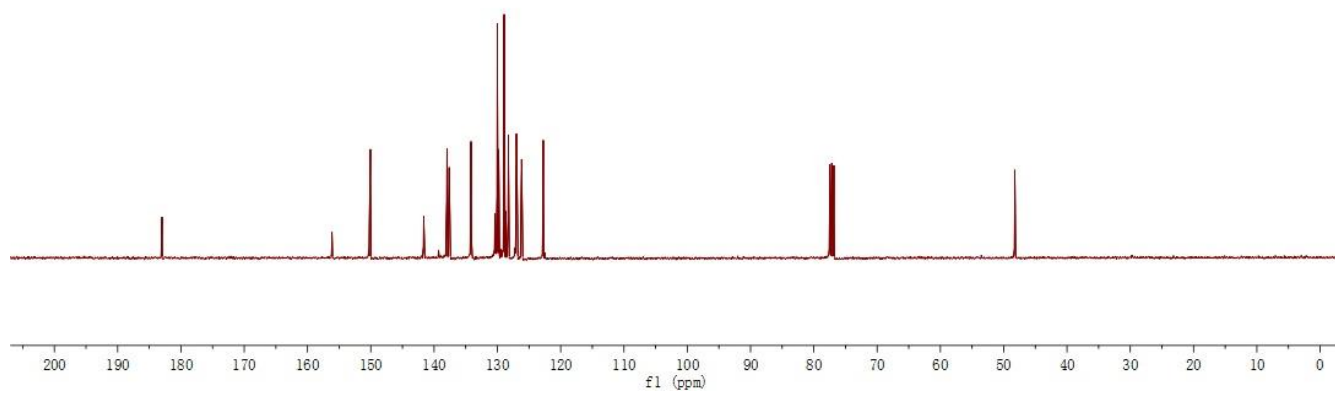

8.36  
8.36  
8.36  
8.35  
8.35  
7.76  
7.76  
7.74  
7.74  
7.61  
7.60  
7.59  
7.49  
7.47  
7.44  
7.36  
7.36  
7.34  
7.25  
7.23  
7.19  
7.09  
5.08

2.39

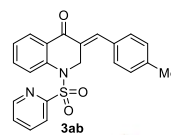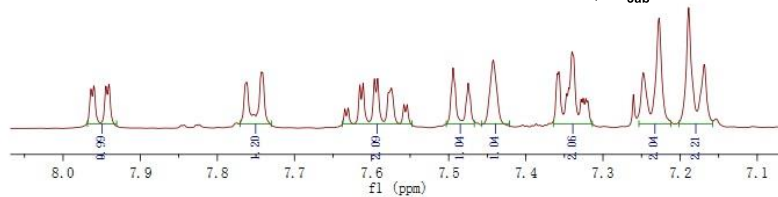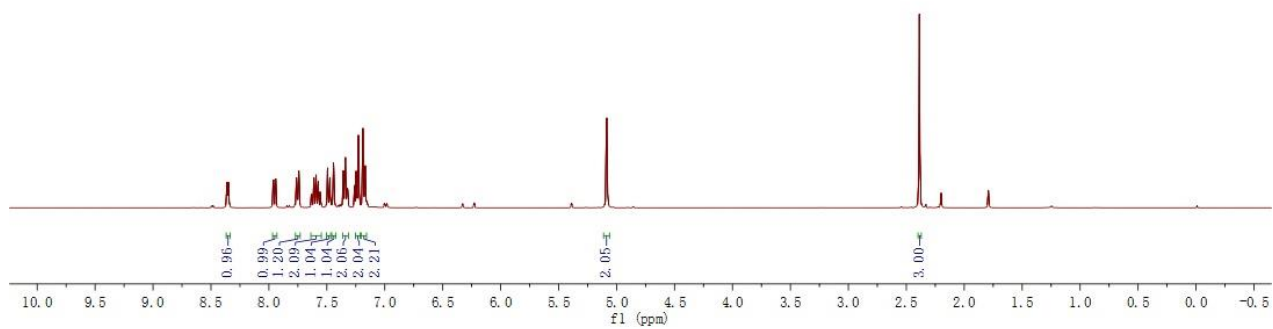

183.0

156.1

150.8

140.3

137.9

137.8

137.8

134.0

131.3

130.1

129.7

129.5

128.8

128.2

128.2

126.9

126.2

122.7

77.5

77.2

76.8

48.2

21.5

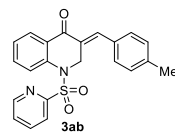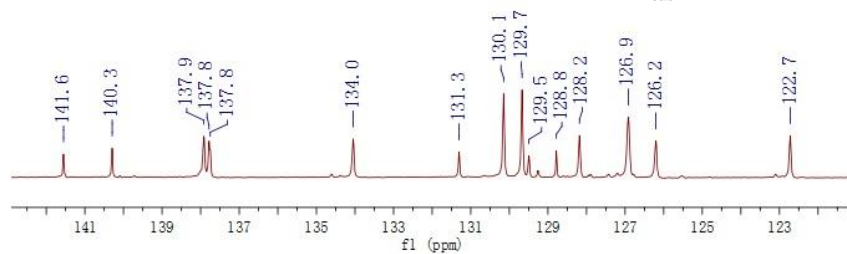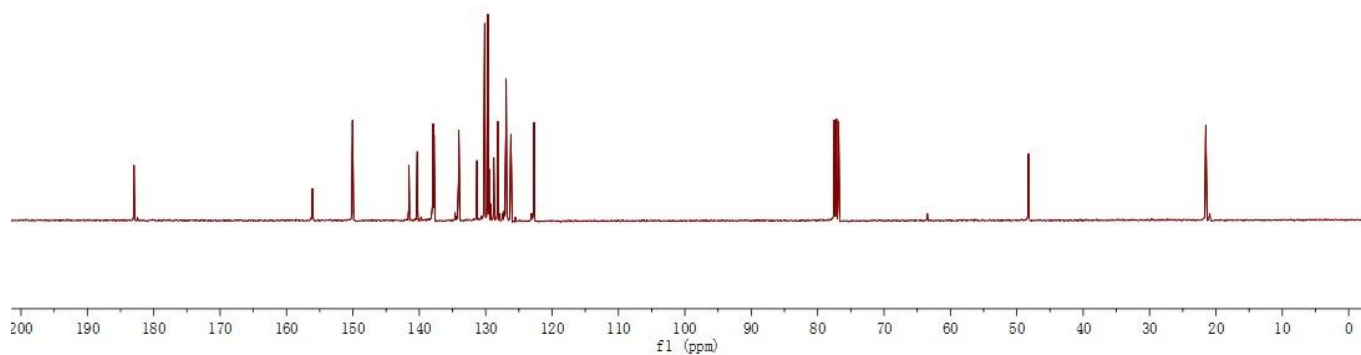

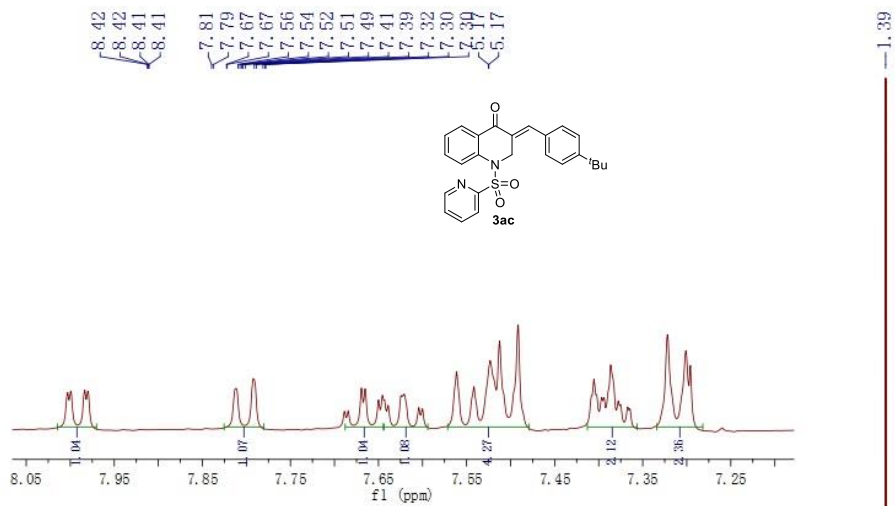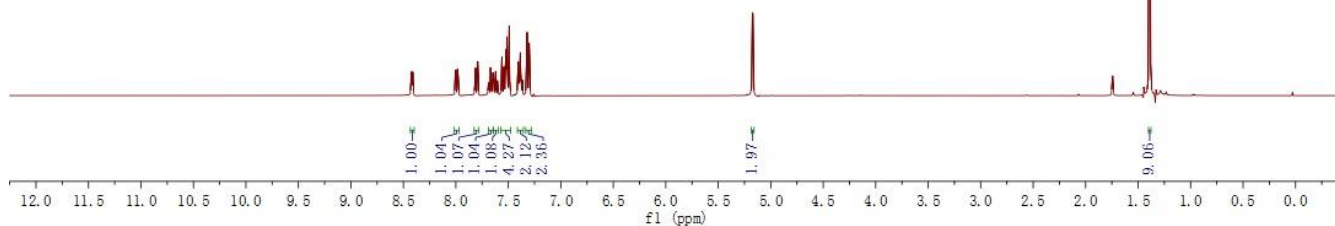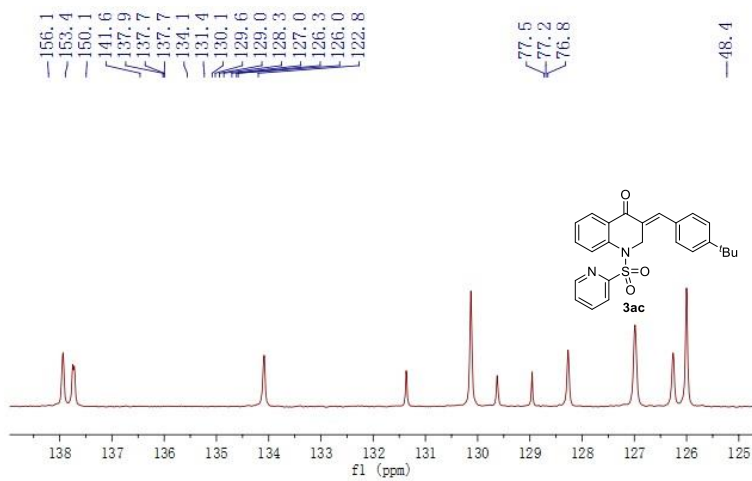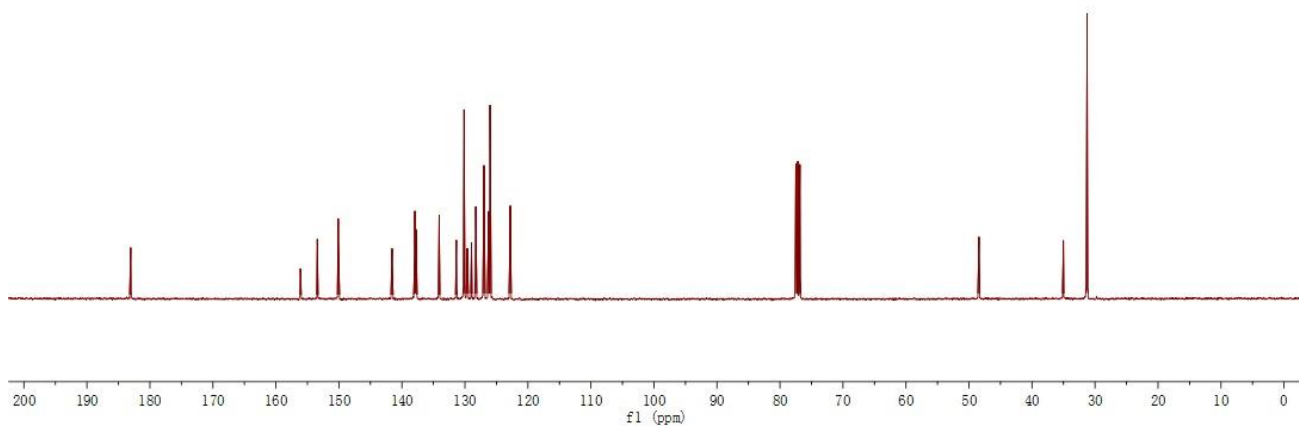

8.38  
8.38  
8.37  
8.37  
7.97  
7.95  
7.95  
7.78  
7.76  
7.62  
7.62  
7.52  
7.50  
7.43  
7.36  
7.34  
7.29  
7.27  
7.26  
6.96  
6.96  
5.11

3.87

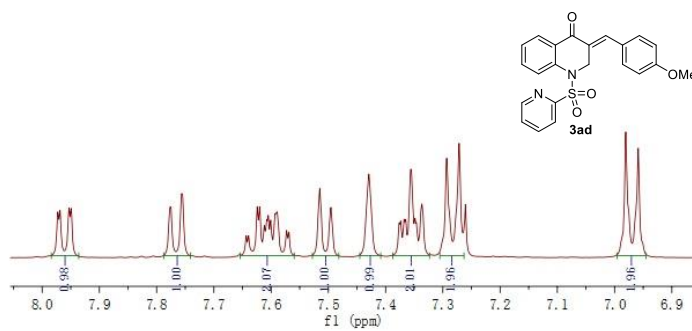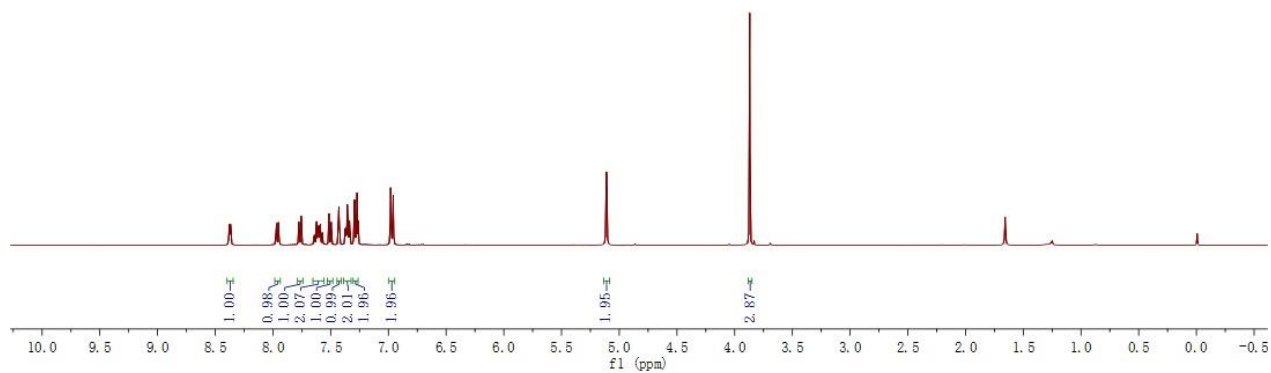

183.1

161.0  
156.1  
150.2  
137.9  
137.7  
134.1  
132.2  
128.3  
128.3  
127.0  
127.0  
126.8  
126.3  
122.8

77.5  
77.2  
76.8

55.5  
48.3

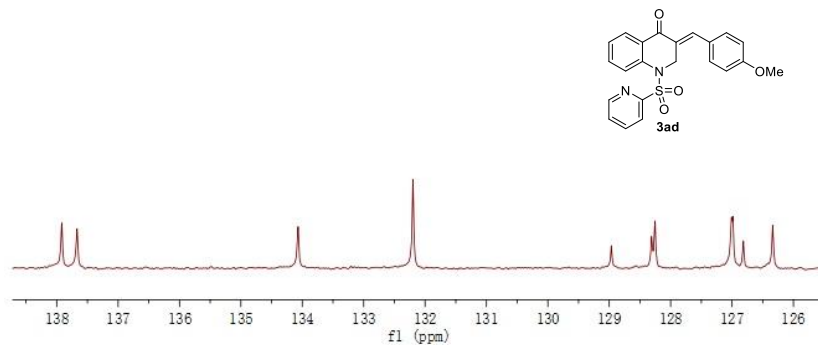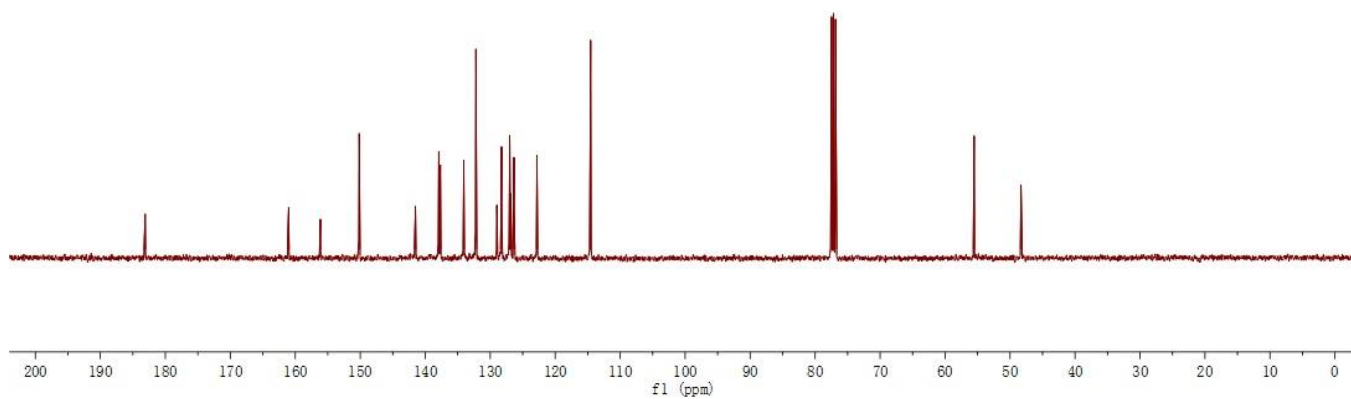



8.40  
8.40  
8.39  
8.39  
7.77  
7.75  
7.75  
7.66  
7.66  
7.53  
7.53  
7.48  
7.48  
7.37  
7.37  
7.35  
7.34  
7.33  
7.32  
7.26  
7.17  
7.14  
7.09  
5.09

-1.68

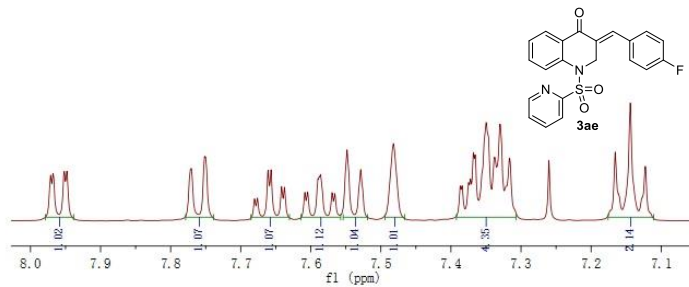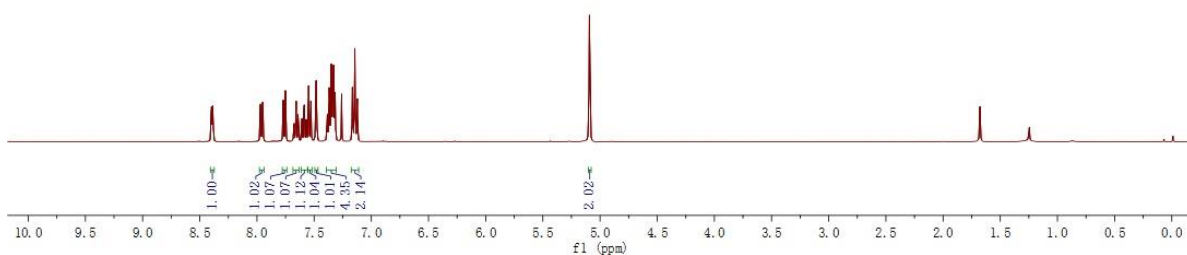

-183.0

164.6  
162.1  
156.2  
150.1  
138.0  
134.3  
132.1  
132.0  
128.4  
127.1  
127.0  
126.1  
126.1  
116.2

77.5  
77.2  
76.8

-48.3

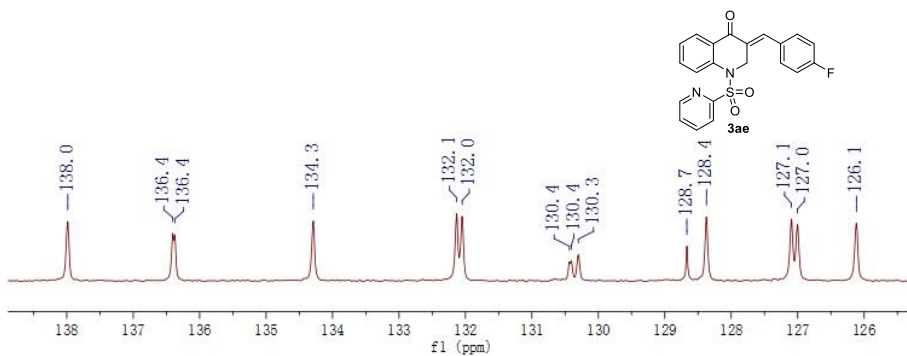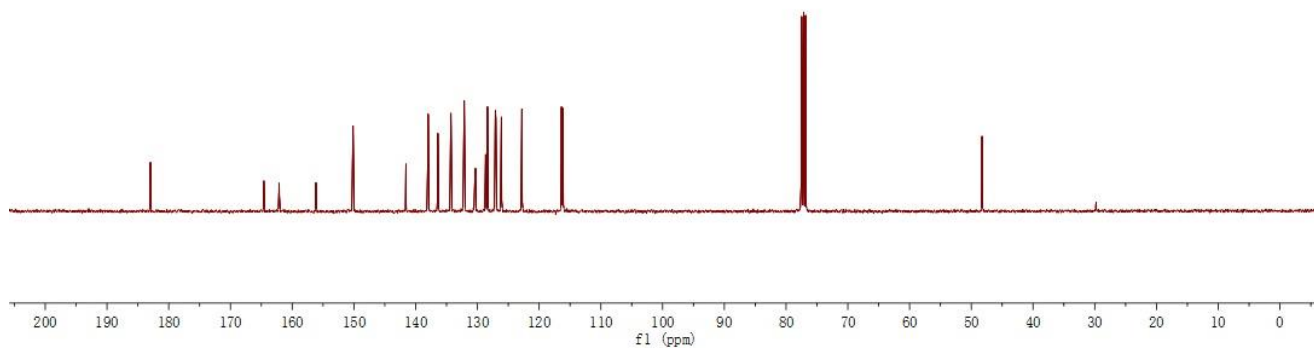



8.39  
8.39  
8.38  
8.38

7.96  
7.96  
7.94  
7.94  
7.76  
7.74  
7.66  
7.66  
7.58  
7.56  
7.55  
7.53  
7.44  
7.37  
7.36  
7.34  
7.20  
5.07  
5.06

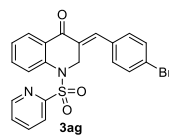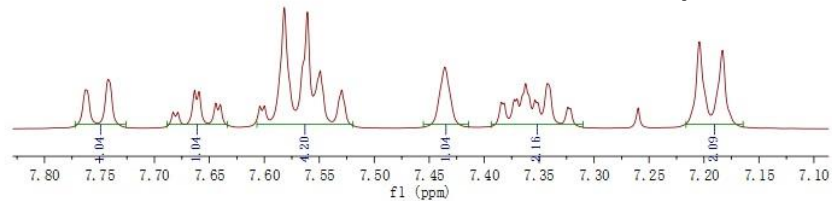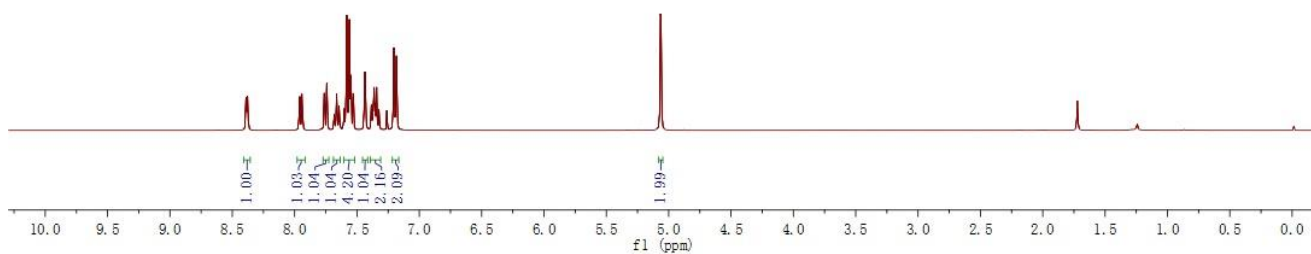

182.8

156.1

150.6  
138.0  
136.1  
134.3  
133.1  
132.3  
131.4  
131.1  
128.6  
128.4  
127.1  
127.0  
126.1  
124.2  
122.8

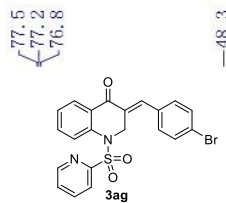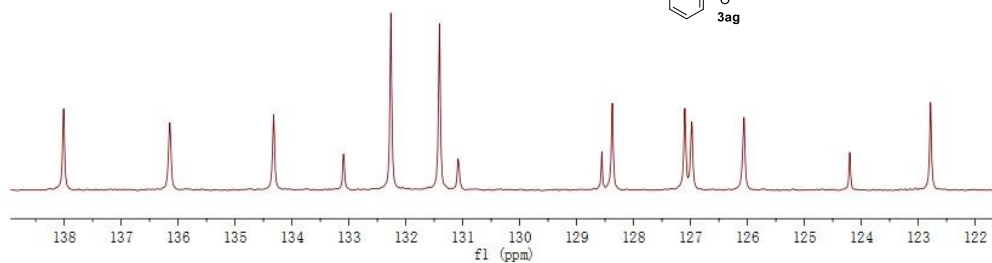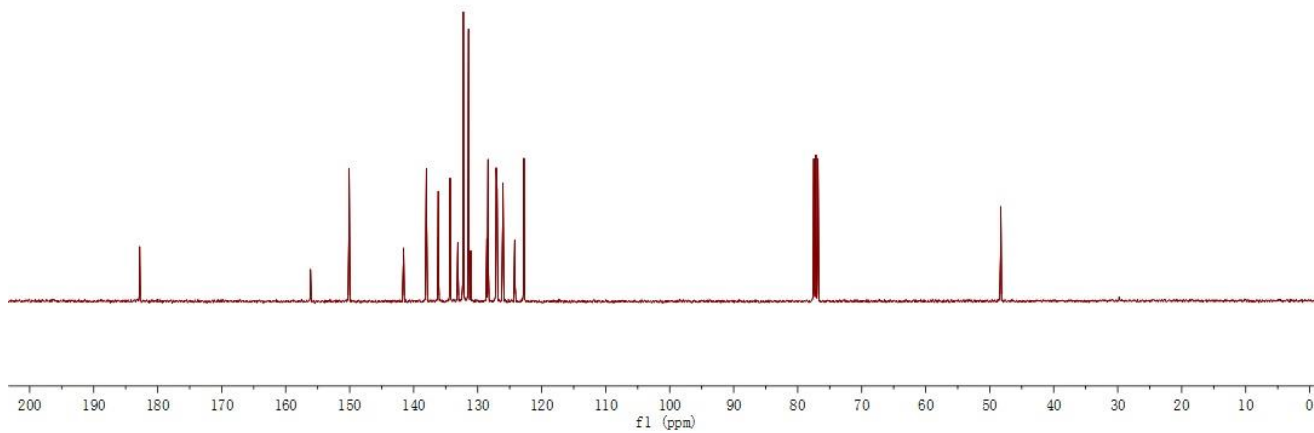

8.41  
8.41  
8.40  
8.40  
8.39  
7.95  
7.77  
7.76  
7.75  
7.71  
7.69  
7.68  
7.58  
7.57  
7.56  
7.55  
7.48  
7.46  
7.34  
7.34  
5.10

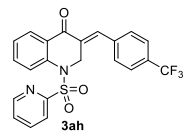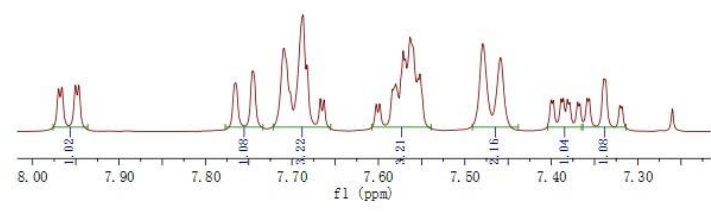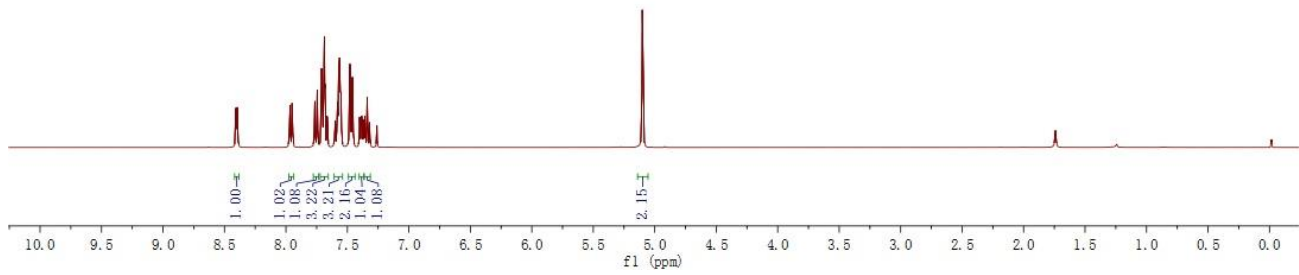

182.7  
156.1  
150.1  
150.1  
141.6  
138.1  
137.8  
135.5  
135.5  
134.4  
134.4  
132.5  
131.3  
131.3  
131.0  
130.7  
128.4  
128.4  
128.4  
127.2  
127.2  
127.0  
127.0  
125.2  
125.2  
122.8  
122.5  
122.5  
77.2  
77.2  
76.8  
48.3

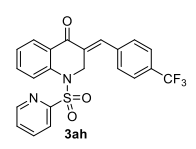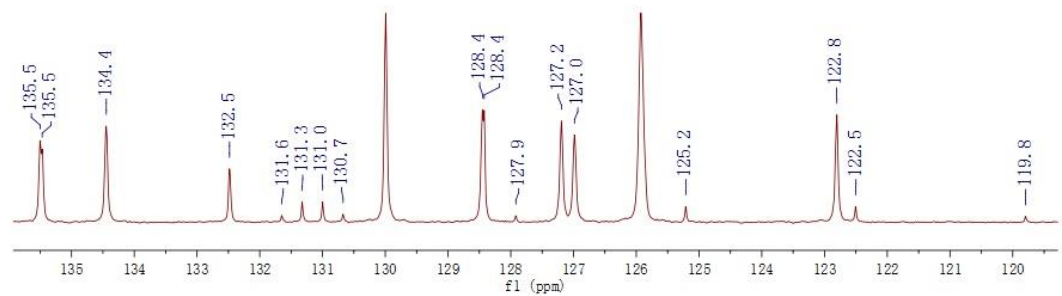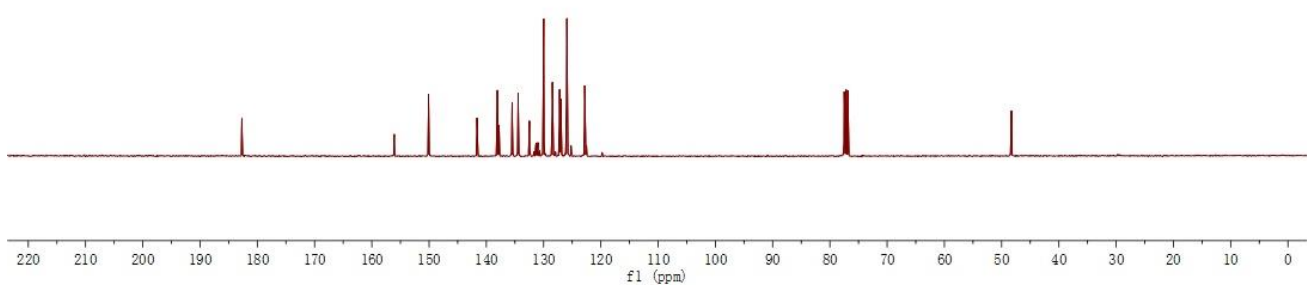

8.42  
8.41  
8.40  
7.78  
7.70  
7.68  
7.66  
7.65  
7.63  
7.56  
7.55  
7.54  
7.54  
7.49  
7.47  
7.42  
7.40  
7.38  
7.37  
5.17

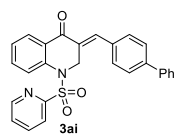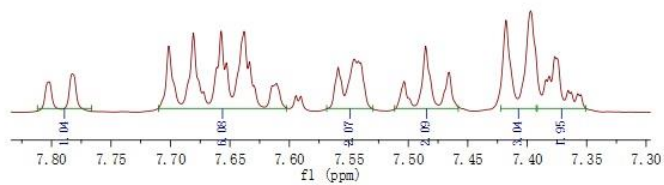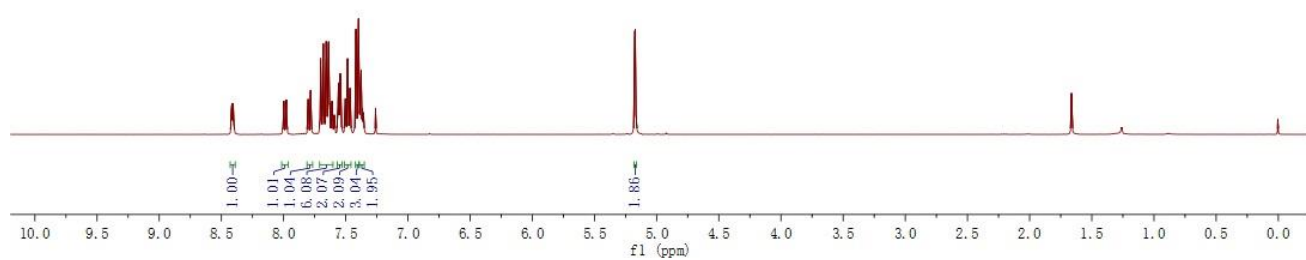

183.0  
156.1  
150.2  
149.2  
141.6  
140.0  
138.0  
137.3  
134.2  
133.1  
130.7  
130.3  
129.1  
128.8  
128.3  
128.1  
127.6  
127.2  
127.1  
126.3  
122.8  
77.5  
77.2  
76.8  
48.4

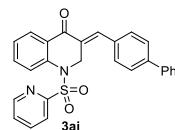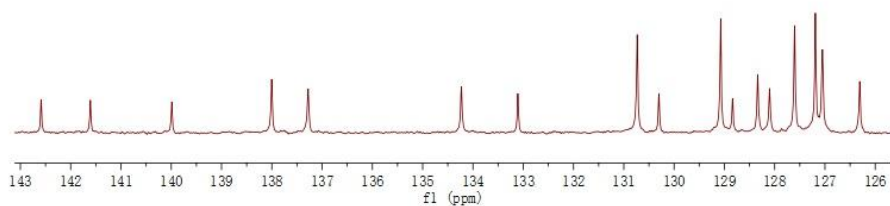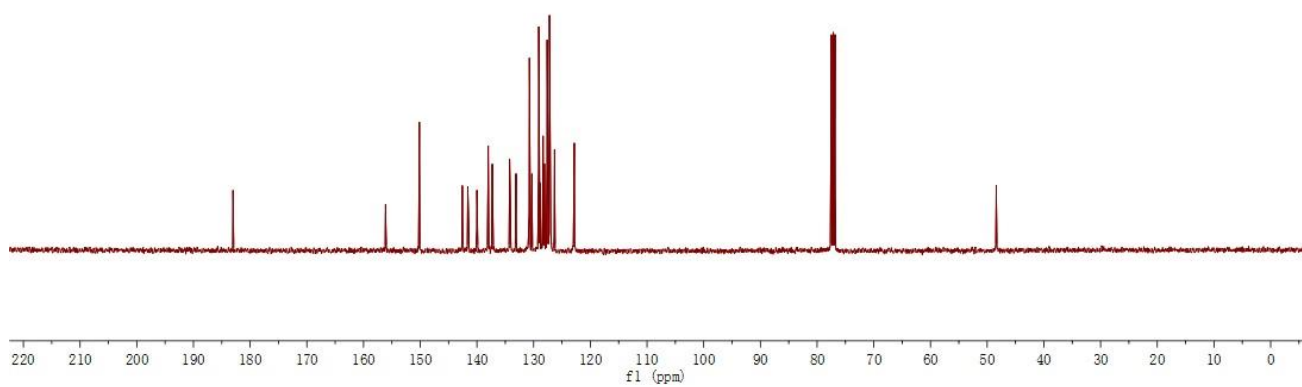

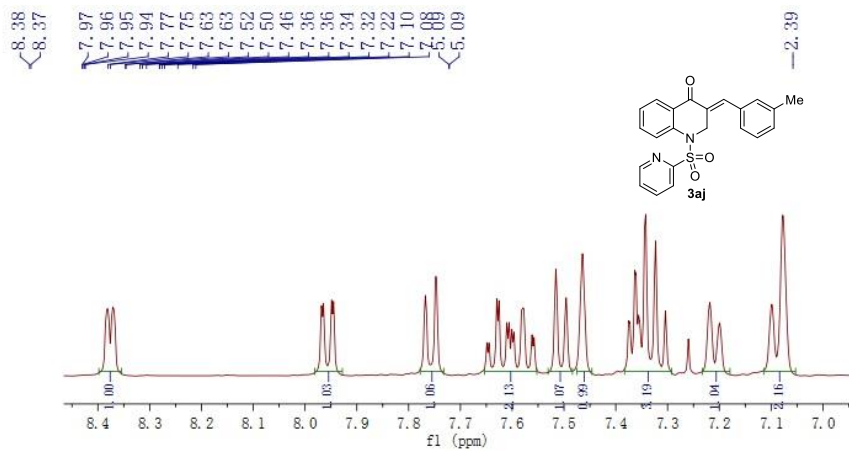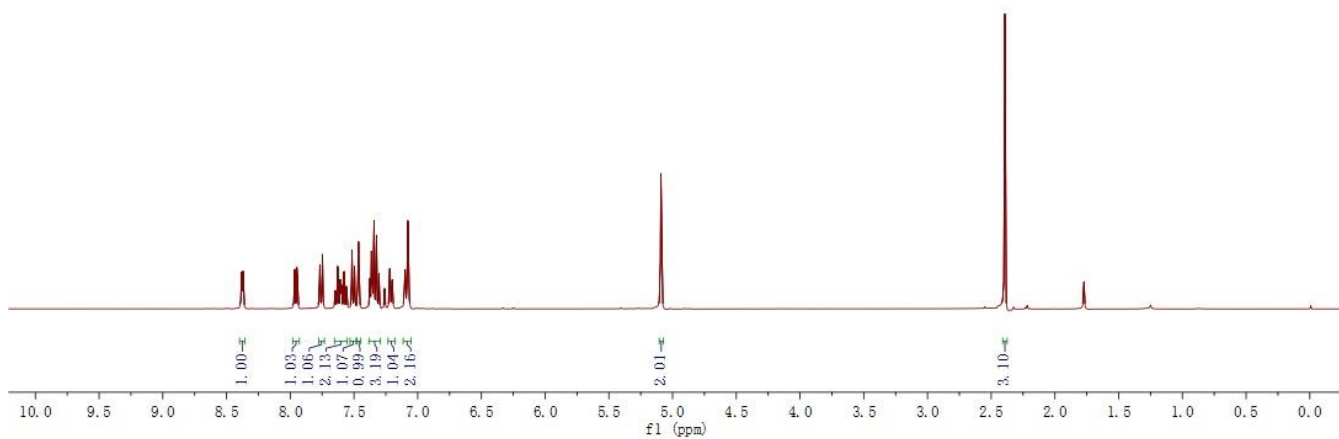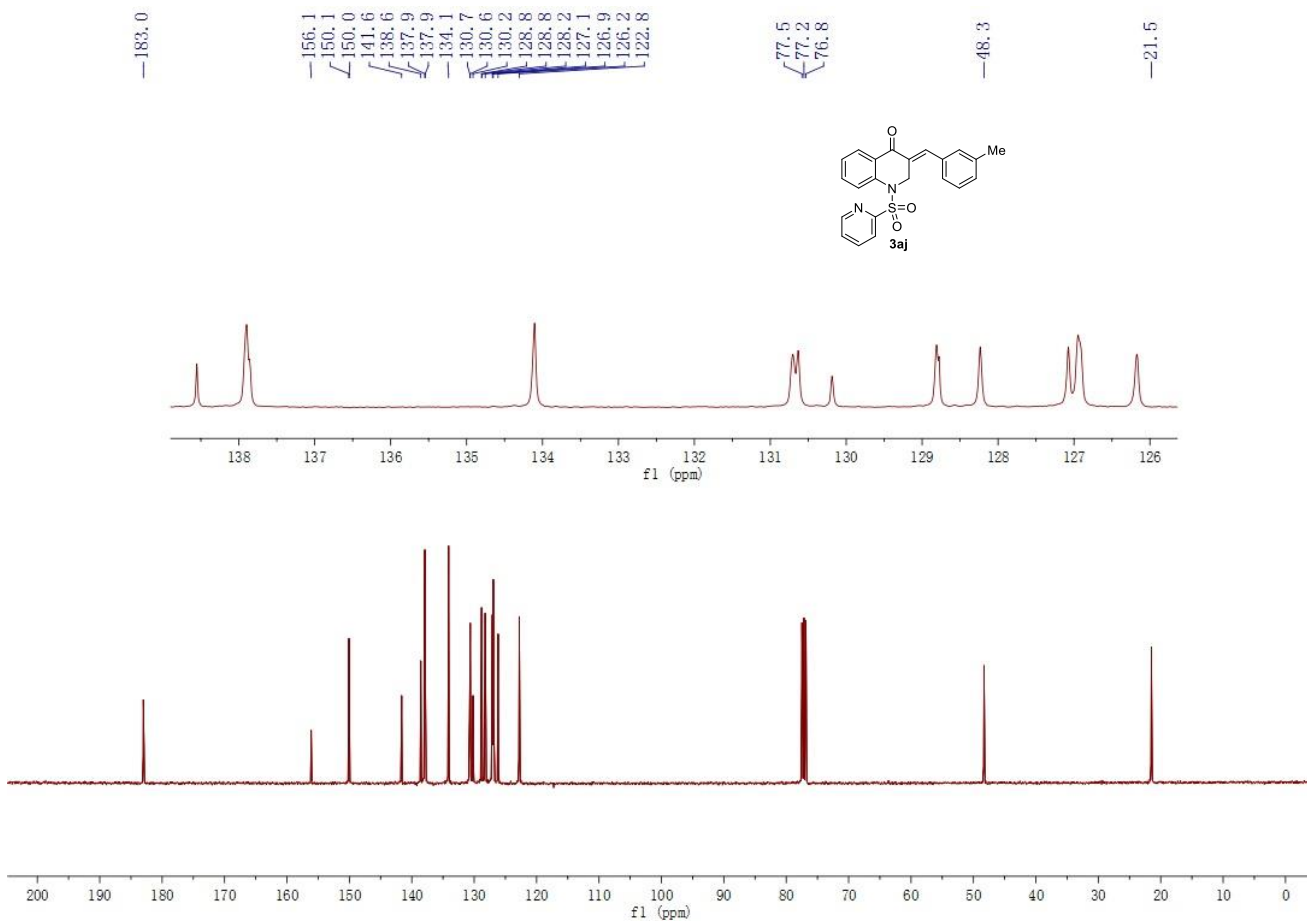

8.40  
8.40  
8.39  
8.38  
7.97  
7.95  
7.95  
7.77  
7.75  
7.66  
7.65  
7.54  
7.52  
7.47  
7.37  
7.36  
7.36  
7.35  
7.33  
6.89  
6.86  
6.10  
-3.84

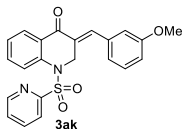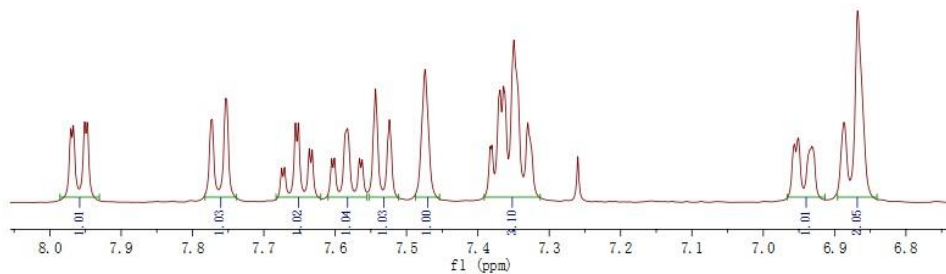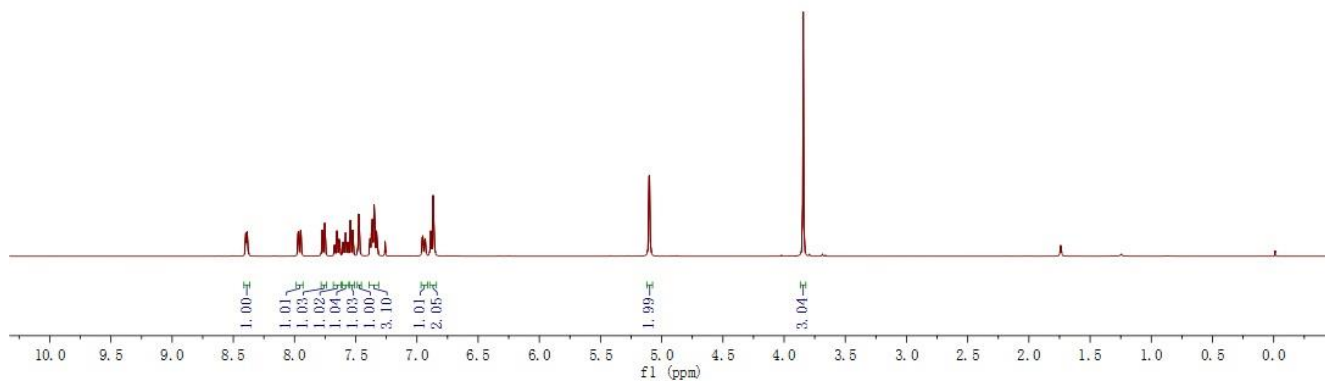

183.0  
159.8  
156.1  
150.1  
138.0  
137.6  
134.2  
130.0  
128.3  
127.0  
126.9  
126.1  
122.8  
118.4  
115.3  
77.5  
77.2  
76.8  
55.4  
48.3

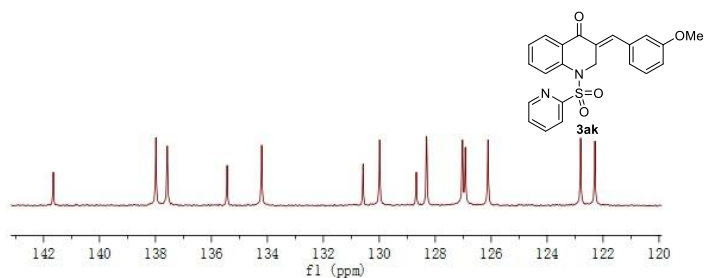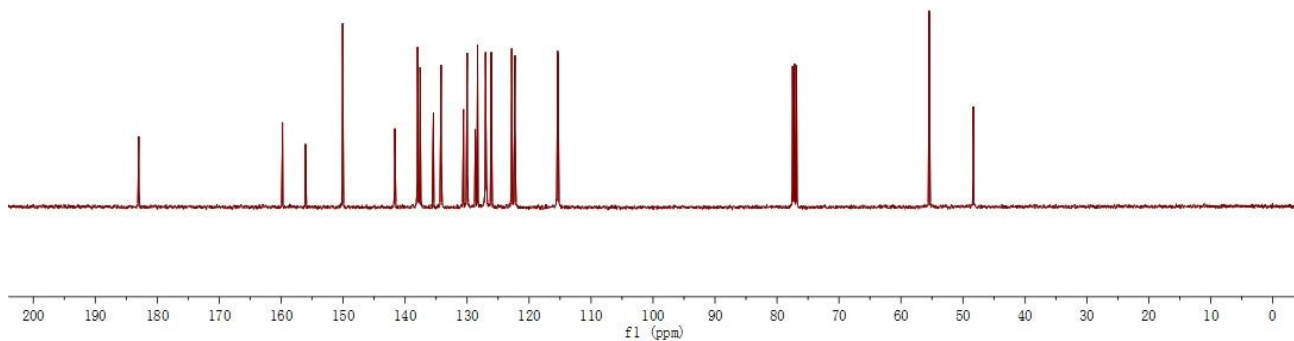







8.42  
8.41  
7.98  
7.97  
7.96  
7.95  
7.78  
7.76  
7.69  
7.68  
7.60  
7.56  
7.54  
7.45  
7.41  
7.40  
7.39  
7.38  
7.36  
7.24  
5.07

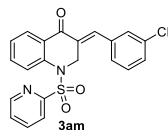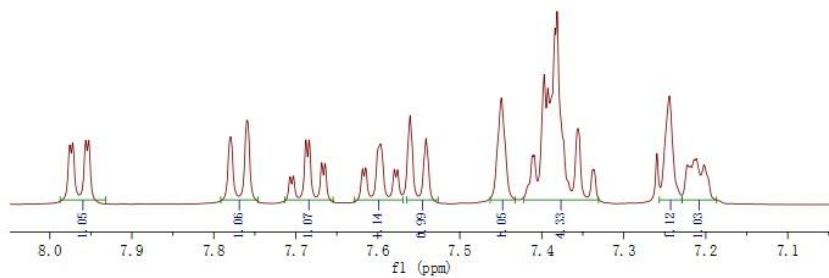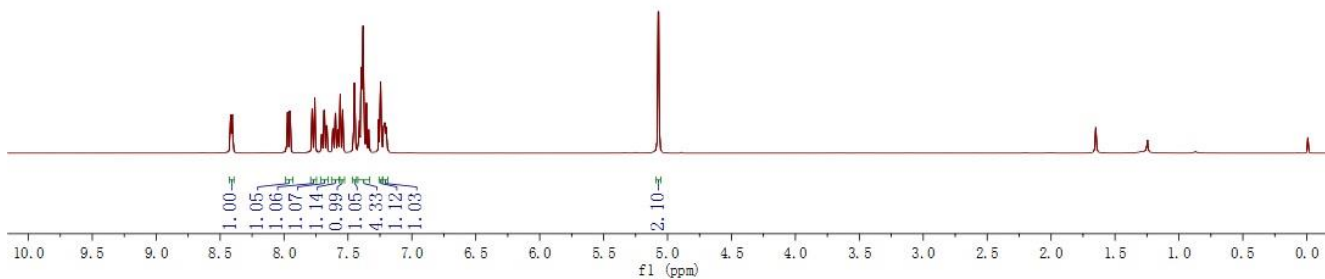

182.8

156.2  
151.7  
138.0  
136.0  
135.8  
134.9  
131.8  
130.3  
129.9  
129.7  
128.6  
128.4  
127.7  
127.1  
127.0  
126.2  
122.9

77.5  
77.2  
76.8

48.3

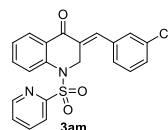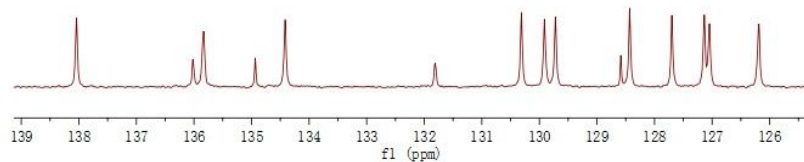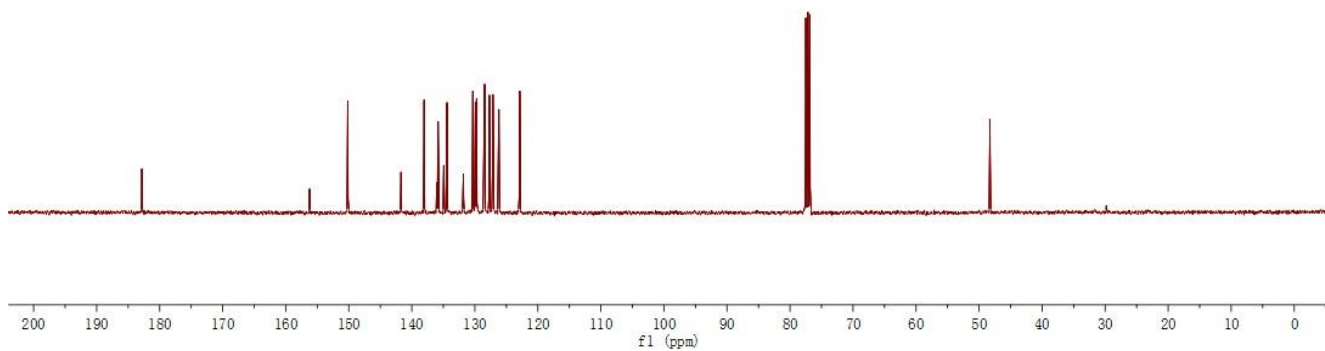

8.45  
8.44  
8.44  
8.01  
7.99  
7.99  
7.81  
7.79  
7.73  
7.72  
7.63  
7.60  
7.58  
7.56  
7.47  
7.43  
7.39  
7.36  
7.34  
7.34  
5.10

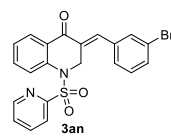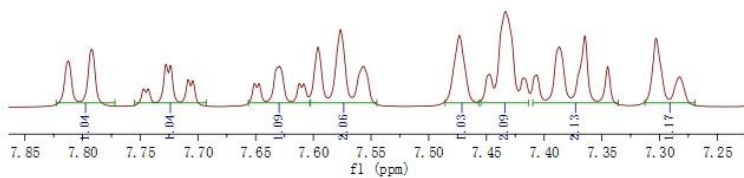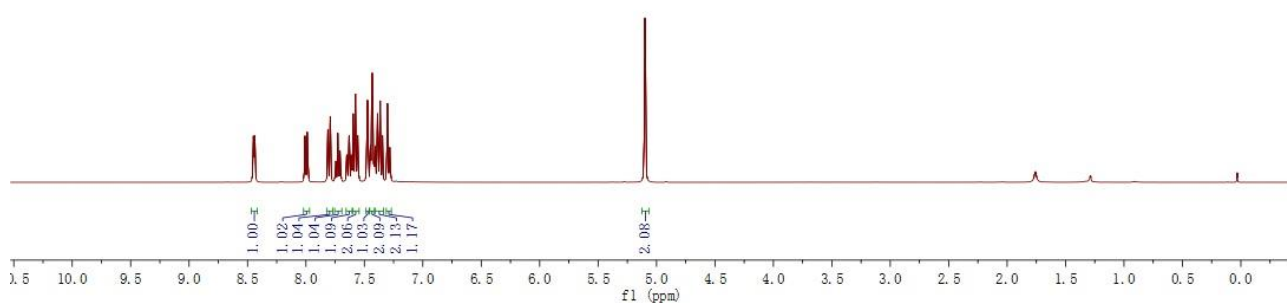

182.7  
156.1  
150.7  
138.0  
136.2  
135.7  
134.4  
132.8  
132.6  
131.8  
130.5  
128.5  
128.4  
128.0  
127.1  
127.0  
126.1  
123.0  
122.8  
77.5  
77.2  
76.8  
48.2

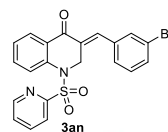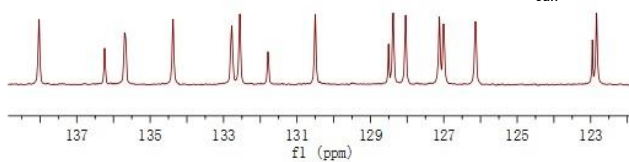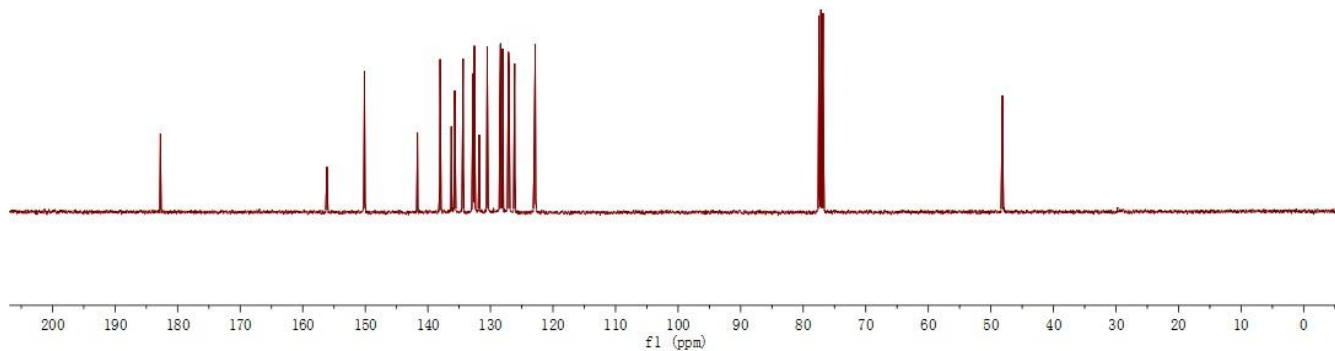

8.49  
8.48  
8.47  
8.47

8.04  
8.04  
8.02  
8.02  
7.83  
7.81  
7.81  
7.78  
7.74  
7.74  
7.64  
7.62  
7.39  
7.39  
7.33  
7.30  
7.29  
7.67  
5.07

-2.25

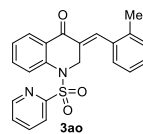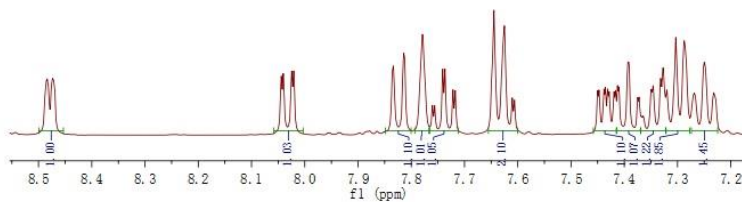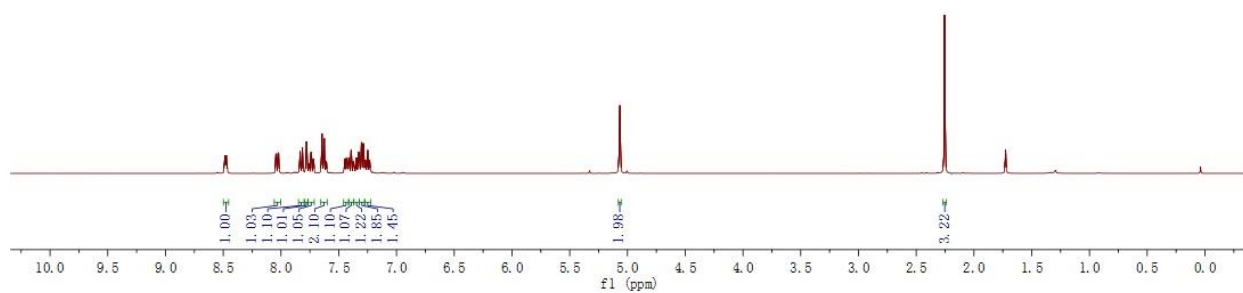

-183.1

-156.4  
-150.0  
-141.8  
-138.0  
-136.7  
-134.2  
-133.2  
-130.7  
-129.8  
-128.8  
-128.7  
-128.4  
-127.1  
-126.8  
-126.2  
-125.9  
-122.7

77.5  
77.2  
76.8

-48.5

-20.1

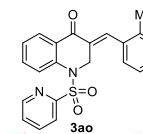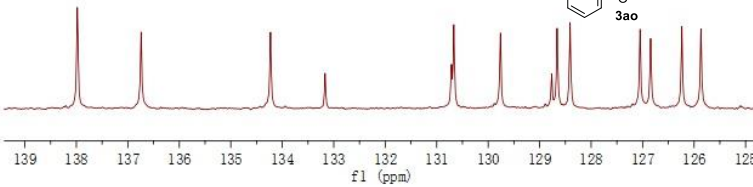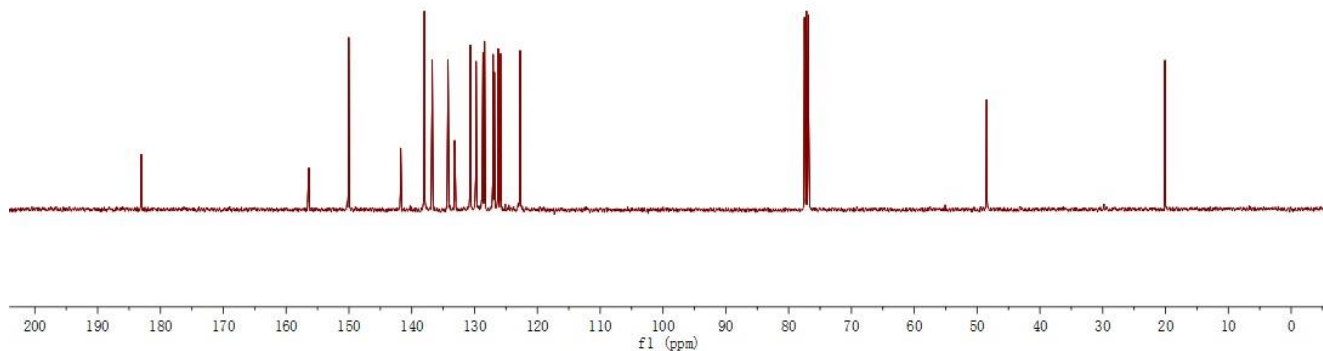

8.43  
8.42  
8.42  
7.98  
7.96  
7.96  
7.79  
7.77  
7.71  
7.71  
7.70  
7.59  
7.55  
7.53  
7.44  
7.35  
7.34  
7.33  
7.31  
5.01  
5.01

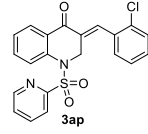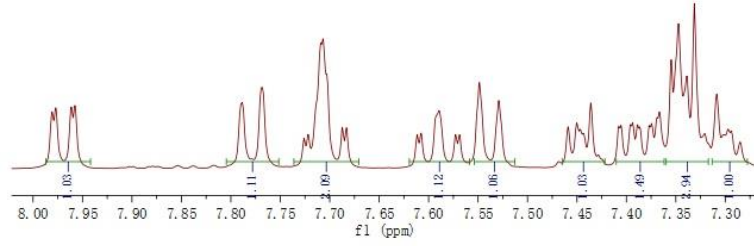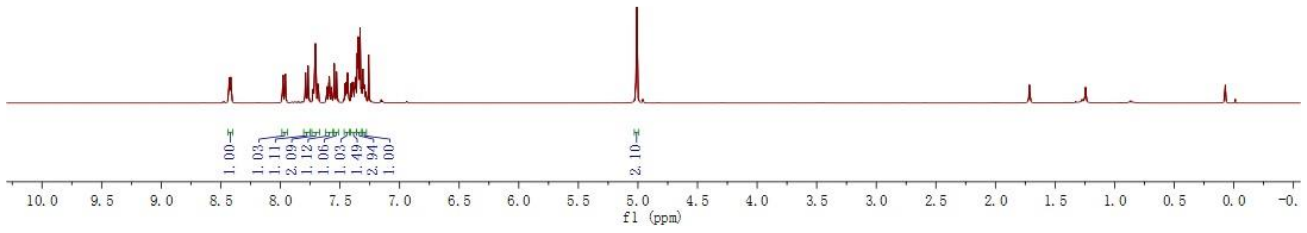

182.5  
155.9  
150.1  
141.7  
138.2  
135.0  
134.5  
134.3  
132.6  
131.8  
130.9  
130.2  
130.2  
128.6  
128.4  
127.3  
127.1  
127.0  
126.2  
122.6  
77.5  
77.2  
76.8  
48.4

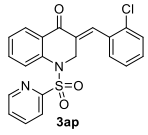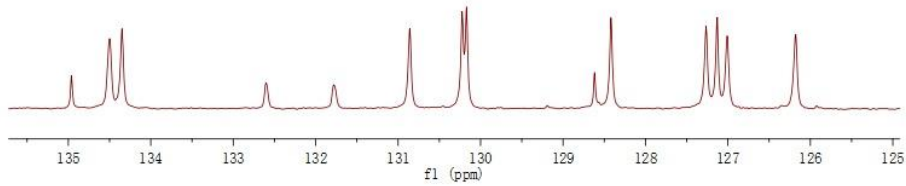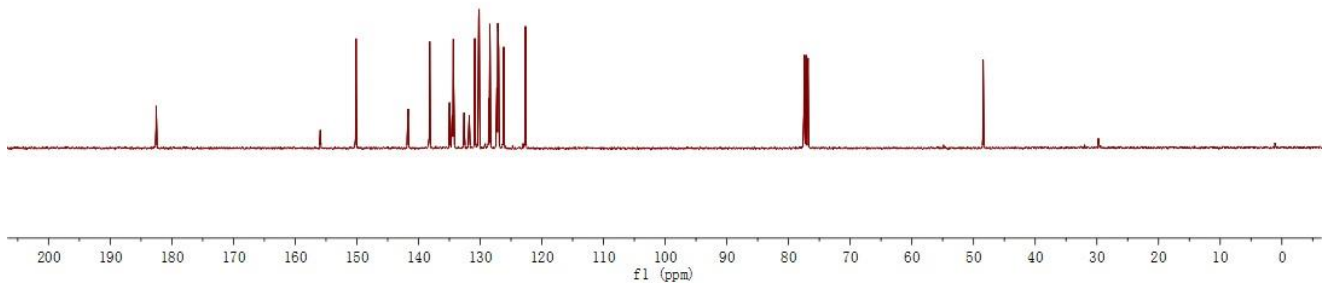

8.45  
8.44  
8.43  
8.43  
7.96  
7.79  
7.77  
7.73  
7.72  
7.68  
7.65  
7.65  
7.63  
7.63  
7.57  
7.55  
7.41  
7.39  
7.34  
7.34  
7.34  
5.01  
5.01

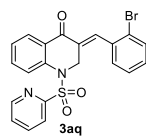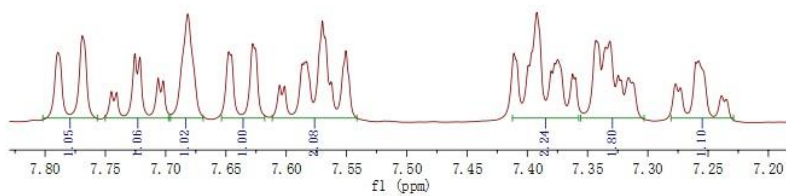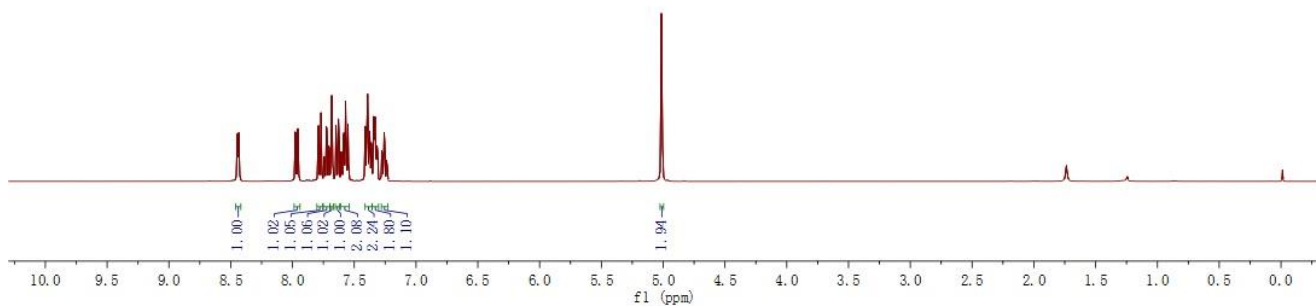

182.5  
155.8  
150.6  
138.2  
136.6  
134.3  
133.3  
131.5  
130.9  
130.2  
128.6  
128.4  
127.7  
127.3  
127.0  
126.0  
125.1  
122.6  
77.5  
77.2  
76.8  
48.4

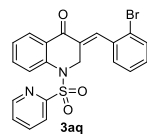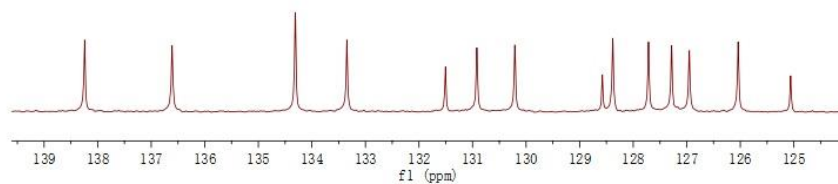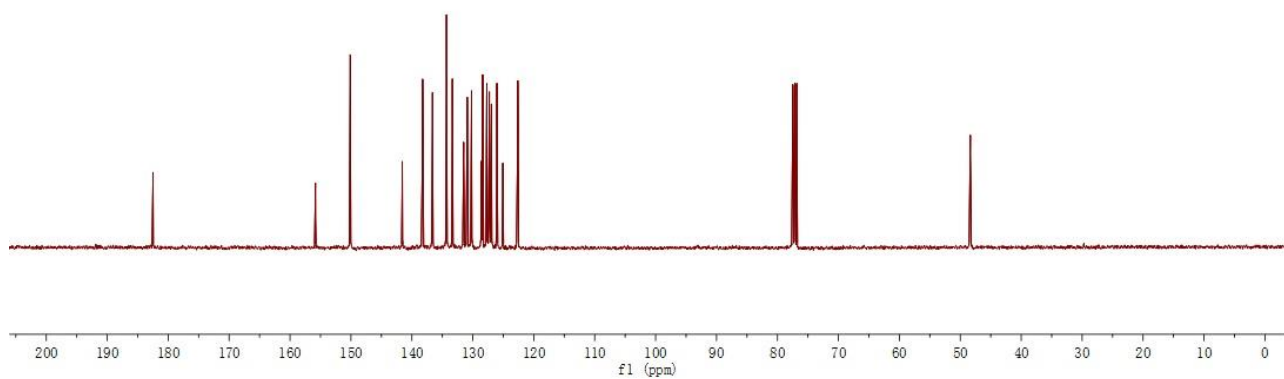

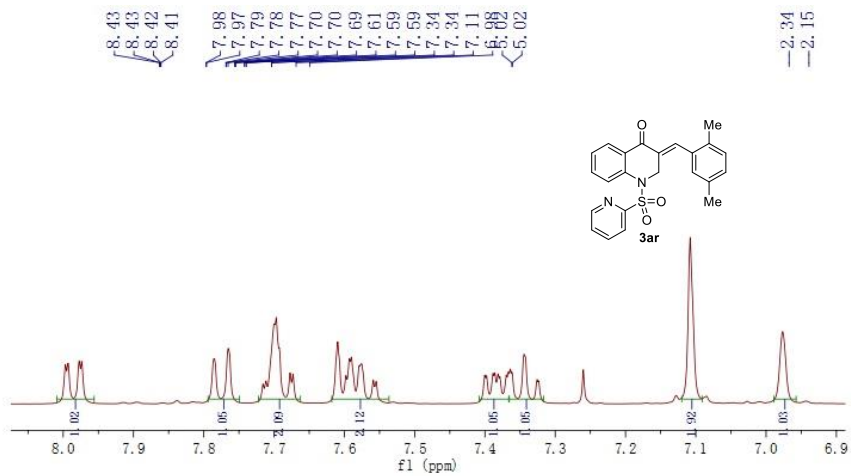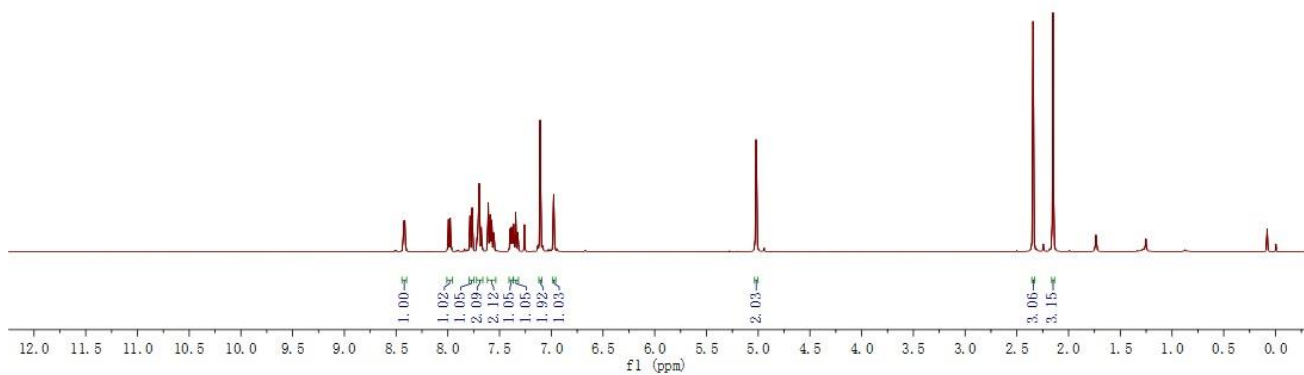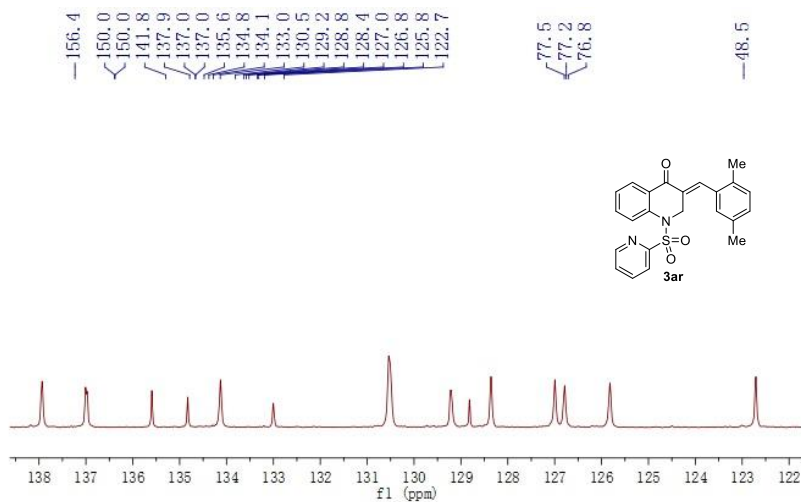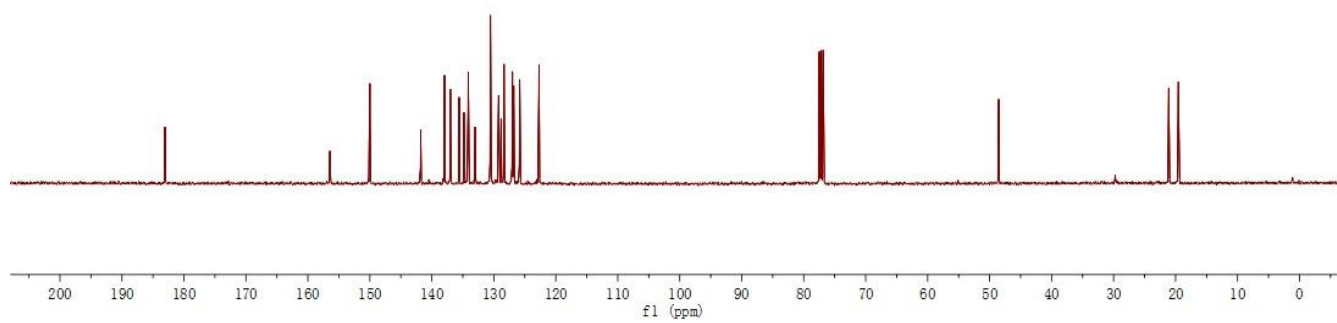

8.39  
8.38  
7.90  
7.88  
7.88  
7.87  
7.78  
7.77  
7.65  
7.61  
7.61  
7.59  
7.59  
7.56  
7.55  
7.54  
7.49  
7.39  
7.27  
5.21  
5.20

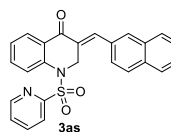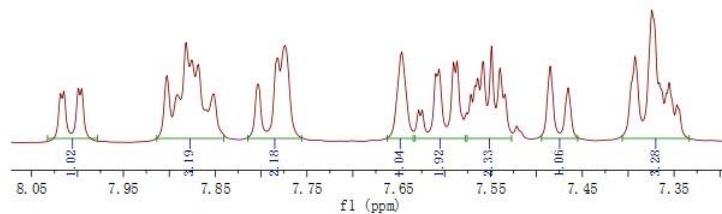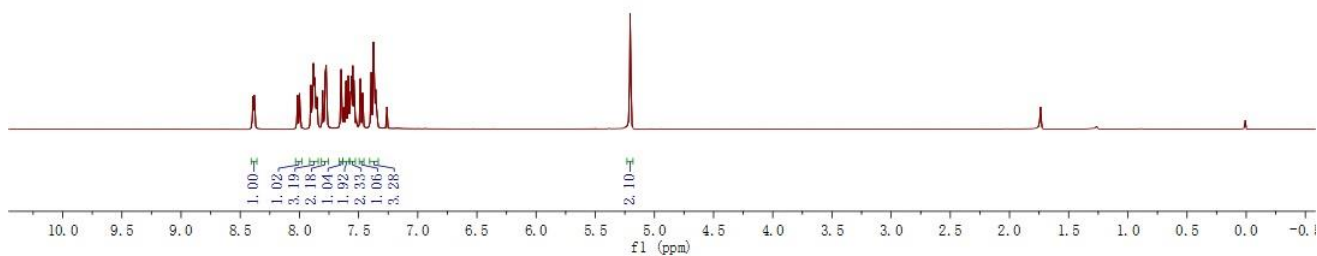

183.0

156.2  
150.7  
137.9  
137.7  
134.2  
133.6  
133.1  
131.7  
130.5  
130.4  
128.8  
128.7  
128.7  
128.3  
127.9  
127.6  
127.0  
127.0  
126.7  
126.2  
122.8

77.5  
77.2  
76.8

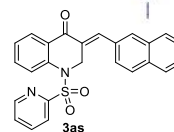

48.4

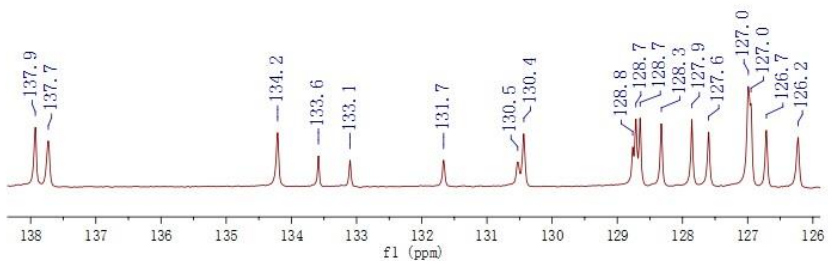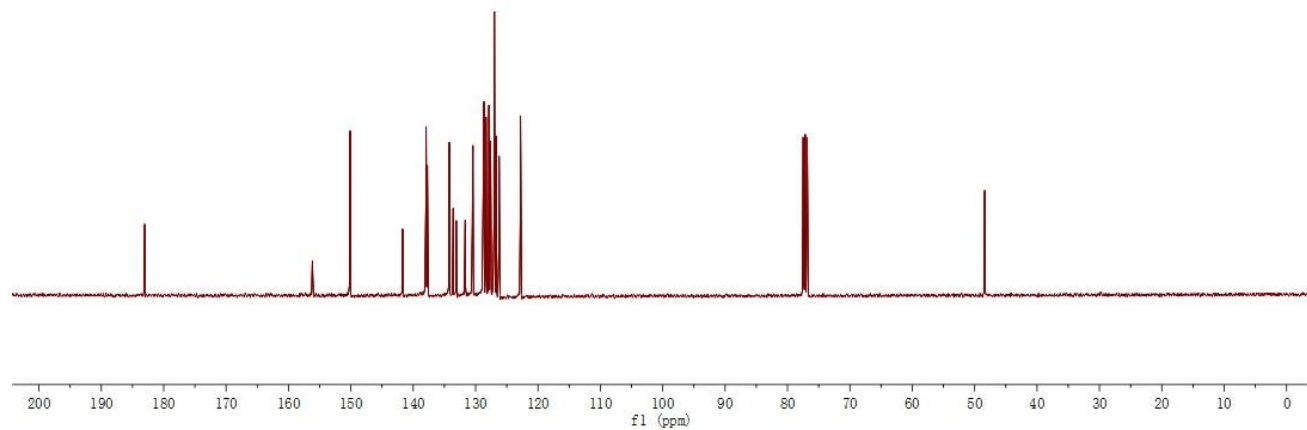



8.64  
8.63  
8.63  
7.91  
7.85  
7.83  
7.82  
7.72  
7.41  
7.41  
7.40  
7.29  
7.27  
7.26  
7.24  
7.23  
7.03  
7.03  
7.02  
7.01  
6.71  
6.70  
6.68

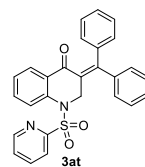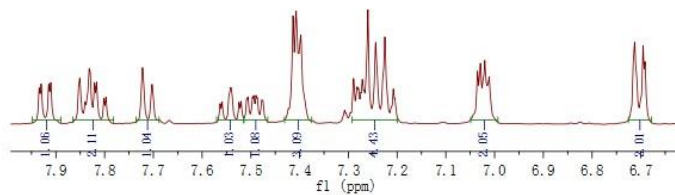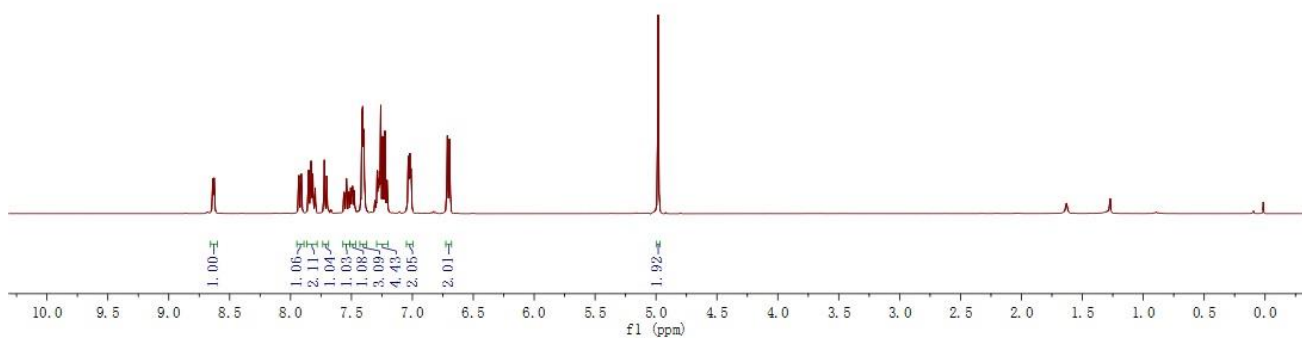

—184.5

157.1  
154.8  
150.3  
141.6  
141.4  
140.1  
138.2  
134.3  
129.6  
129.4  
129.1  
128.7  
128.5  
128.3  
128.0  
127.9  
127.1  
126.7  
126.1  
124.3  
123.0

77.5  
77.2  
76.8

—52.1

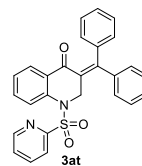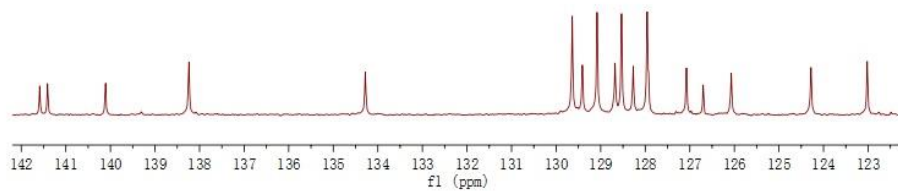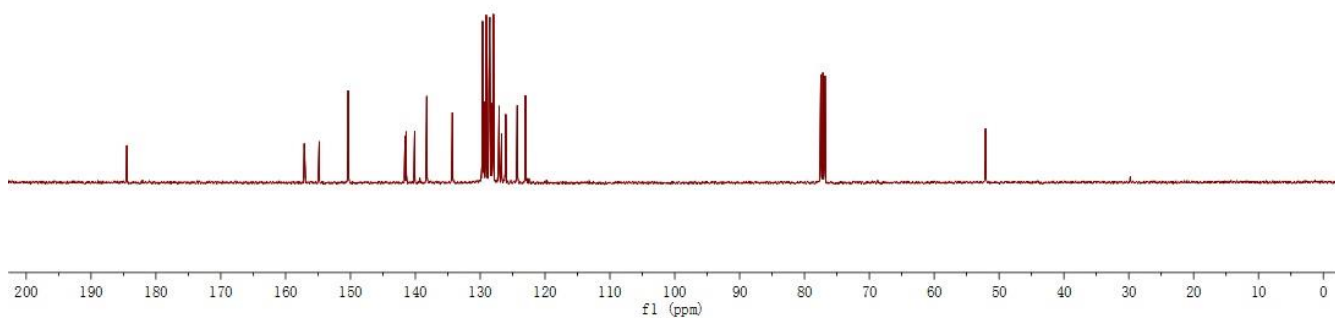



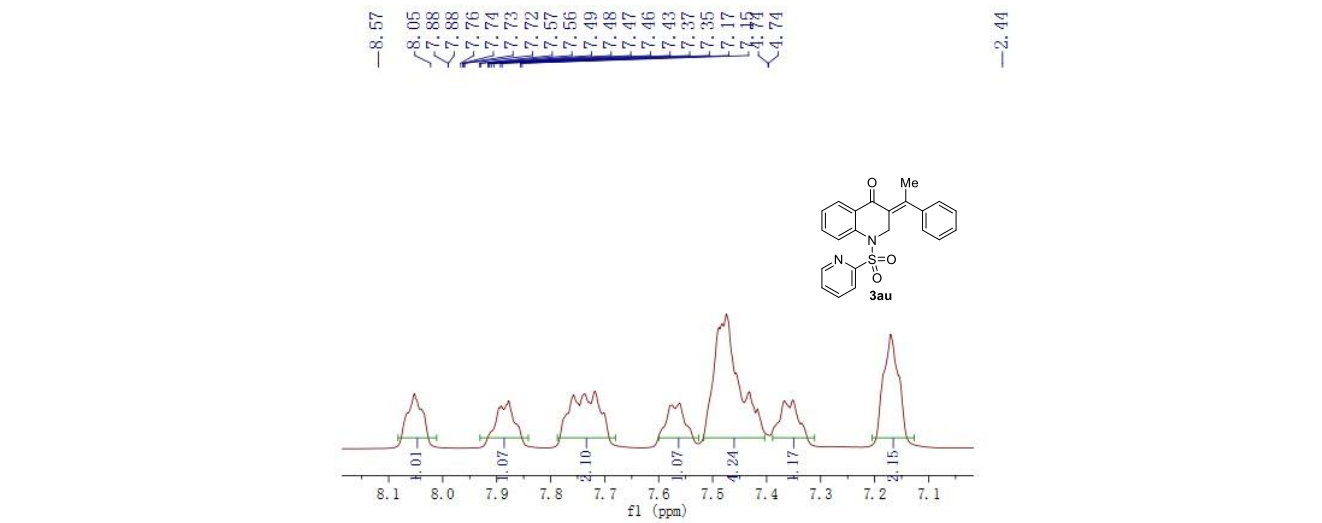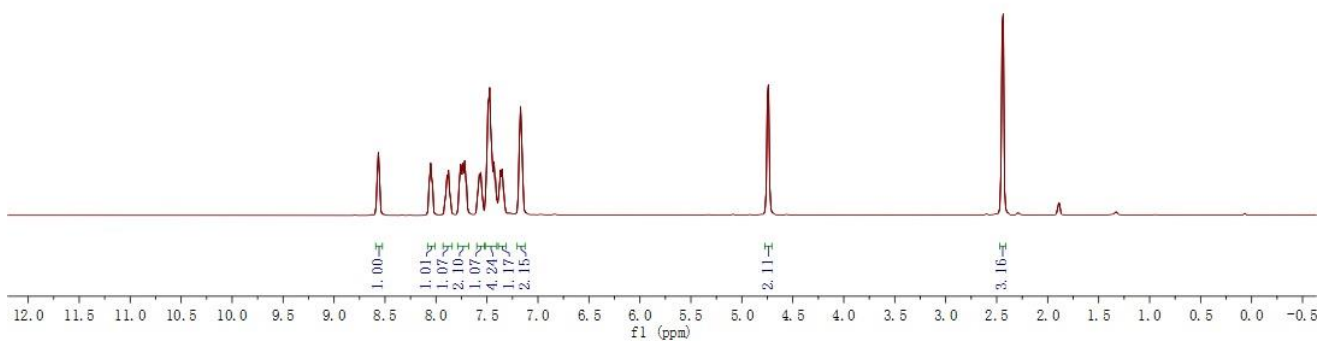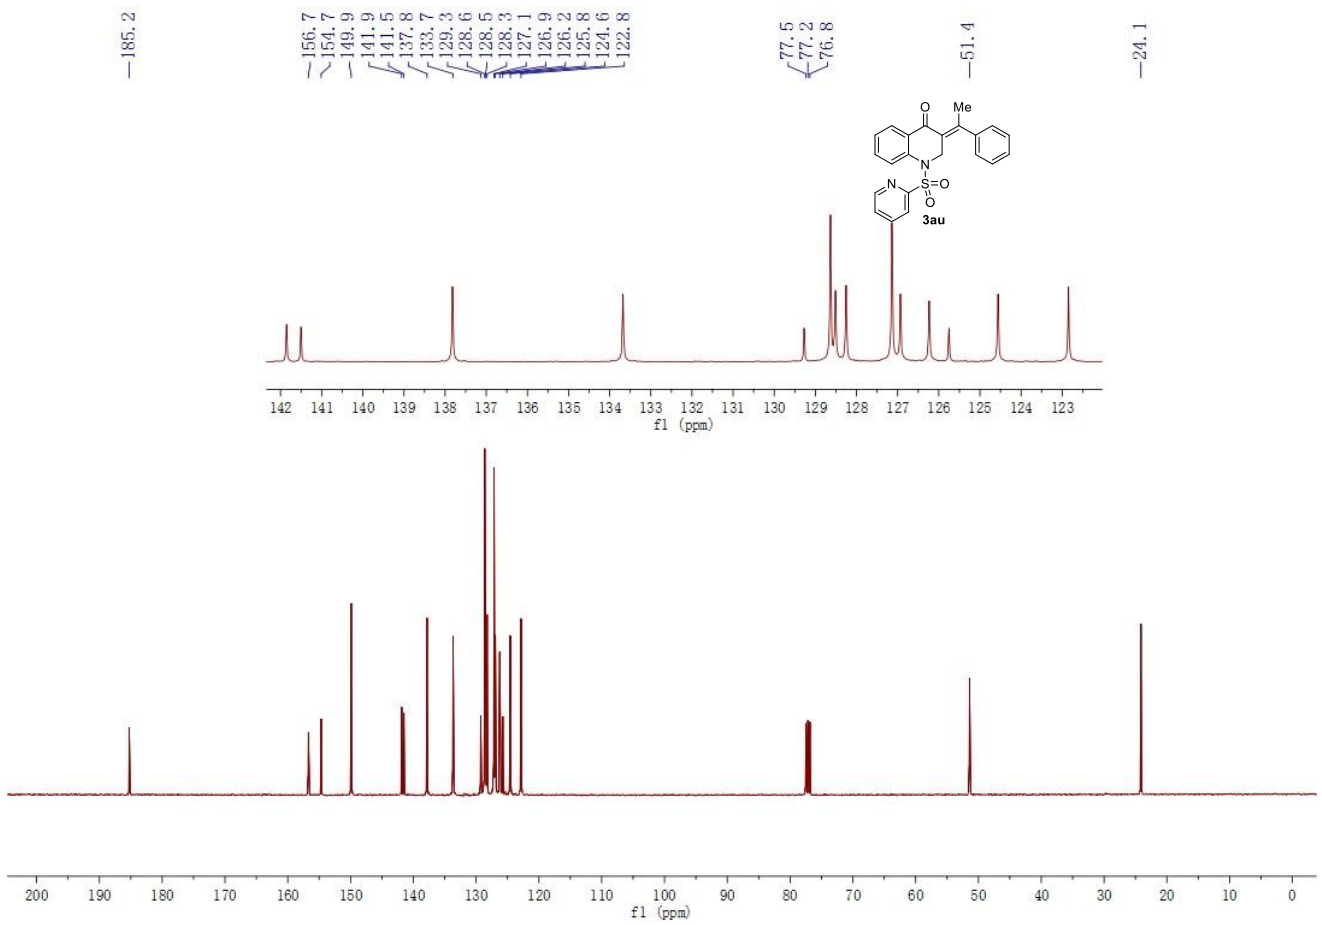



8.33  
8.33  
8.32  
7.98  
7.98  
7.78  
7.61  
7.45  
7.43  
7.36  
7.34  
7.33  
7.32  
7.31  
5.89  
5.88  
5.86  
5.10  
5.10  
1.51  
1.49

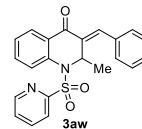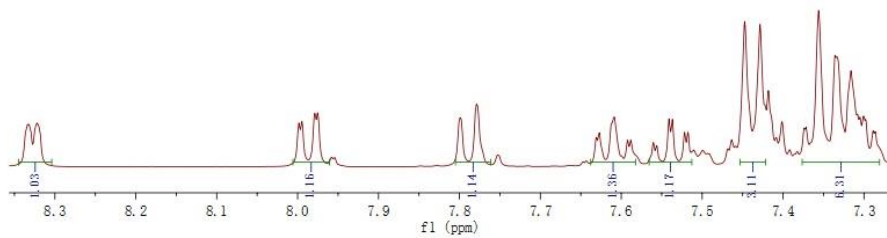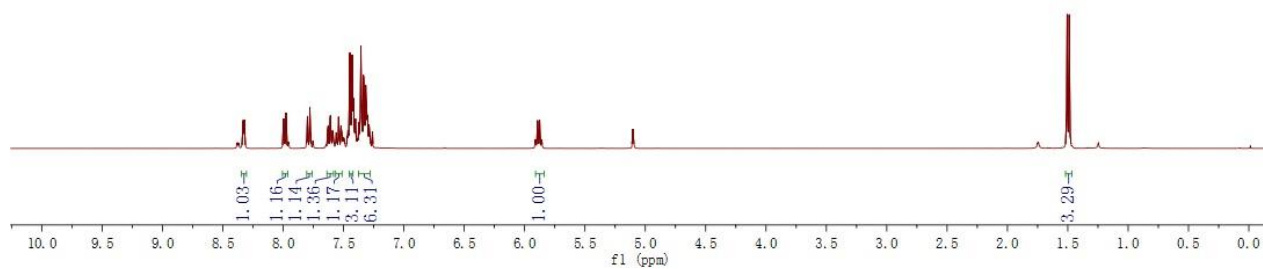

182.9  
156.0  
139.3  
137.8  
136.7  
135.0  
134.5  
134.0  
129.9  
129.8  
129.0  
128.0  
127.8  
127.5  
126.9  
126.8  
122.7  
77.5  
77.2  
76.8  
53.0  
21.0

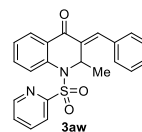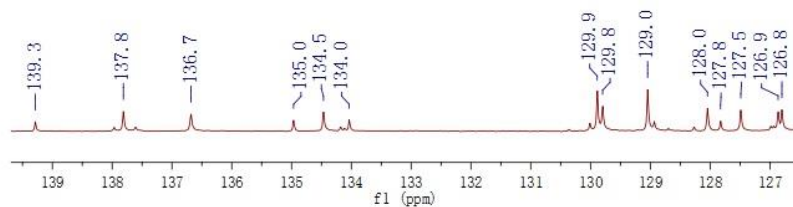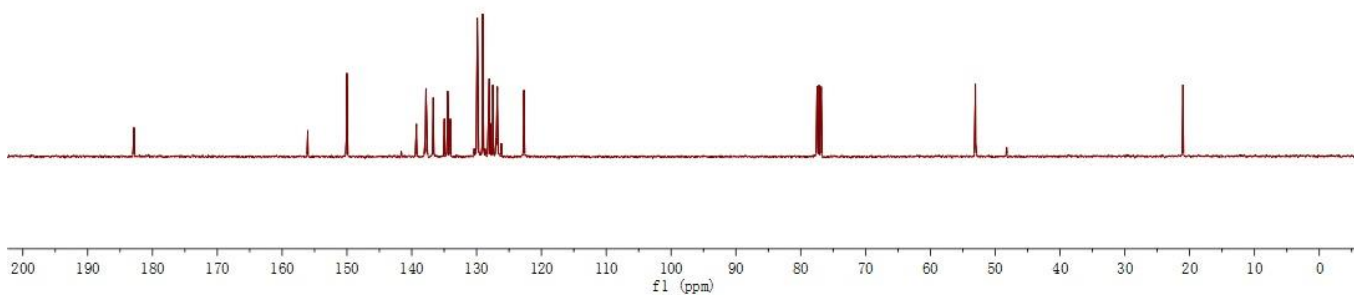

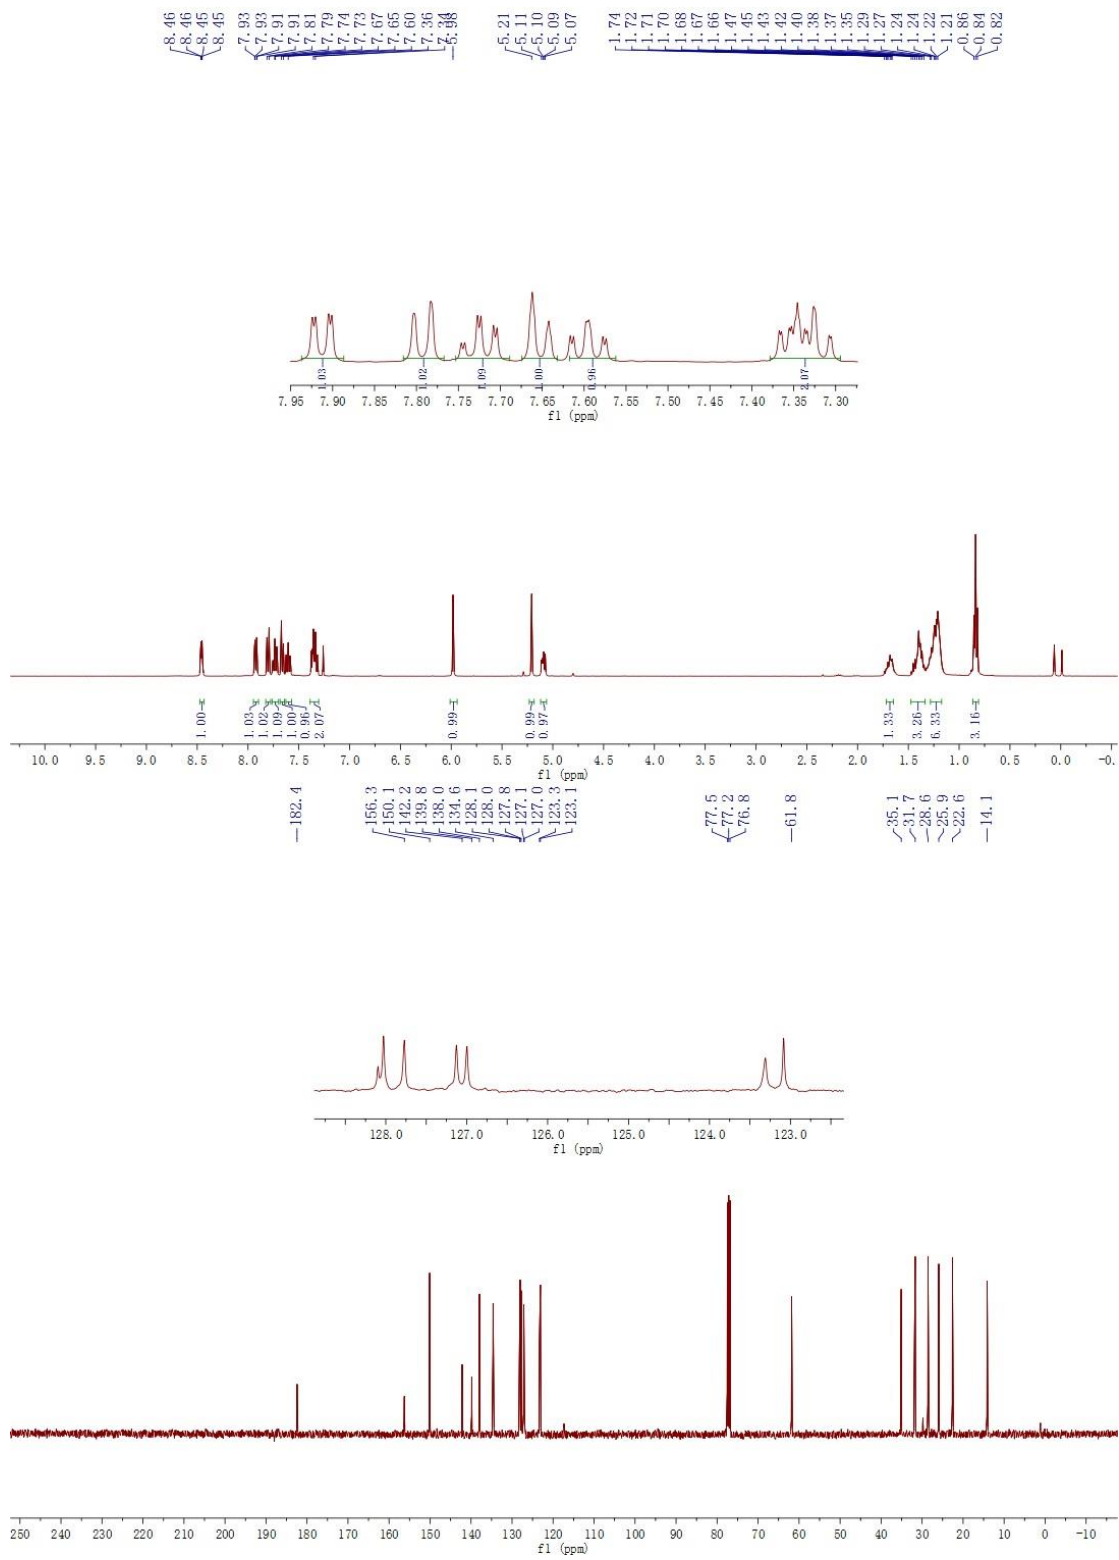

8.42  
8.41  
7.79  
7.70  
7.68  
7.66  
7.65  
7.53  
7.51  
7.50  
7.48  
7.46  
7.45  
7.43  
7.41  
7.40  
7.39  
7.38  
7.33  
7.31

-5.11

-2.42

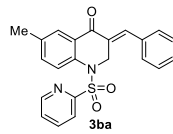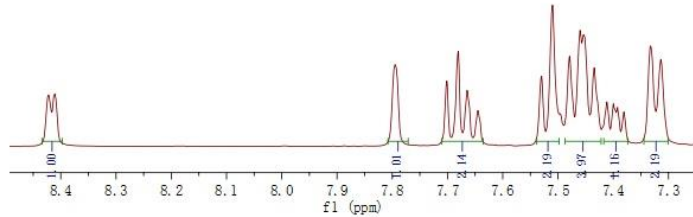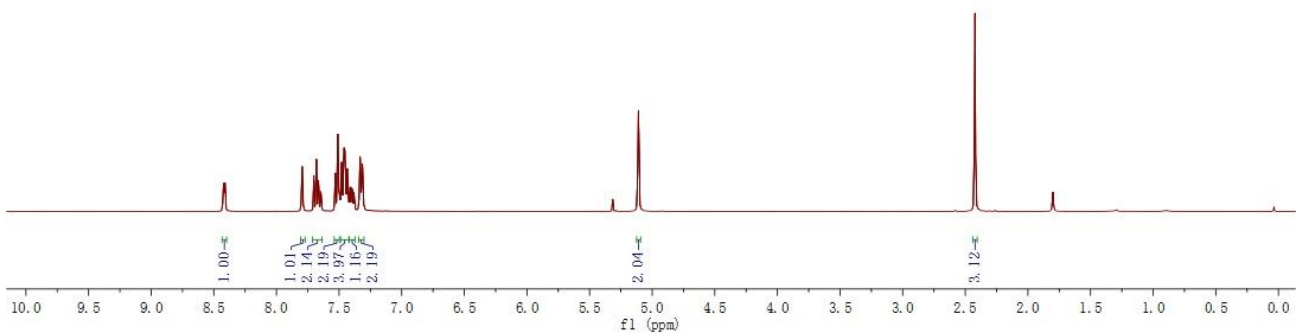

-183.1

-156.1

-139.2

-137.9

-137.5

-137.1

-135.1

-134.2

-130.5

-130.0

-129.7

-128.9

-128.5

-128.3

-126.9

-126.2

-122.8

-77.5

-77.2

-76.8

-48.2

-21.0

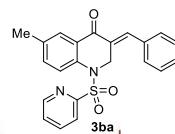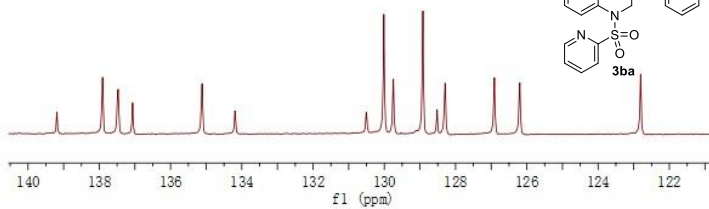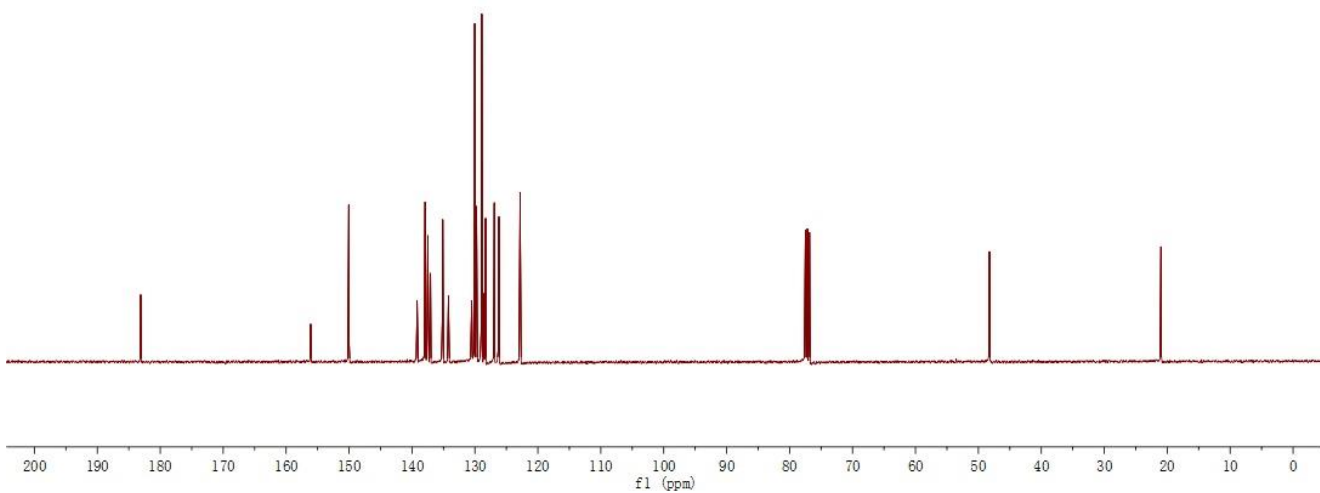

8.39  
8.38  
7.70  
7.68  
7.63  
7.62  
7.47  
7.45  
7.43  
7.42  
7.41  
7.40  
7.30  
7.28  
7.26  
7.17  
7.15  
5.07  
5.06

3.85

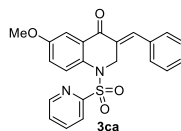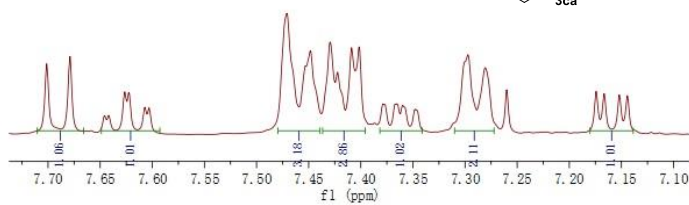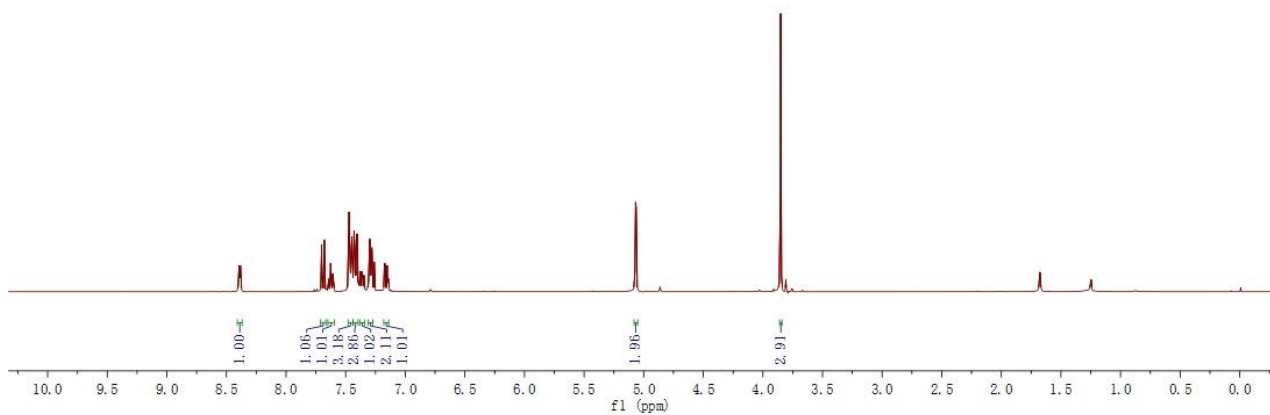

182.9

158.5  
156.0  
150.1  
137.9  
137.8  
134.2  
130.4  
130.1  
130.0  
129.9  
129.0  
128.2  
126.9  
123.0  
120.8

77.5  
77.2  
76.8

55.8

48.3

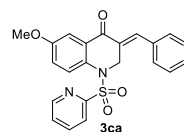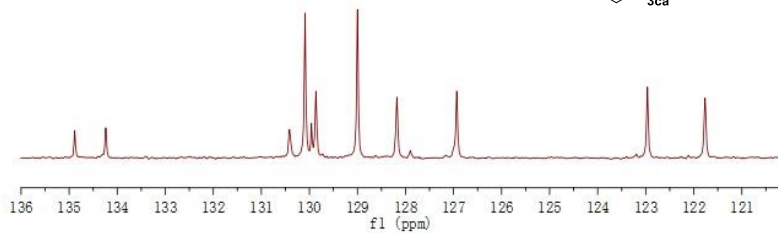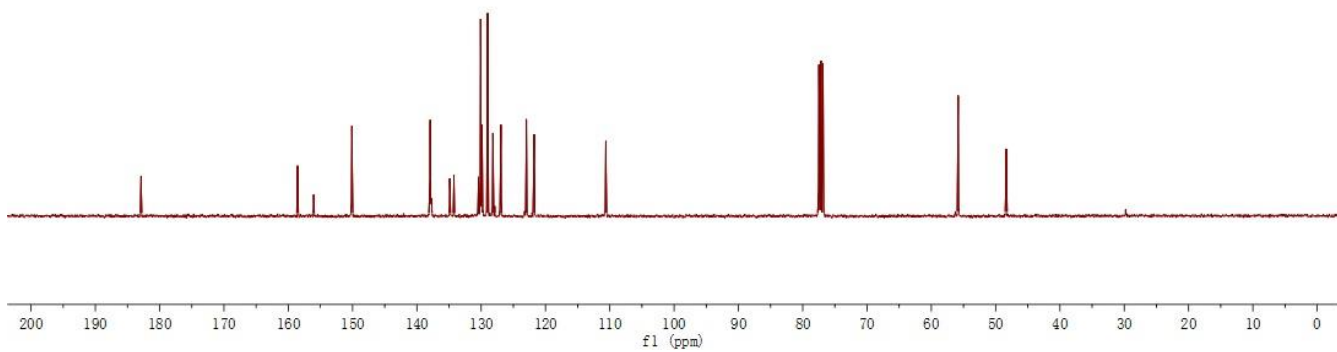

8.43  
8.42  
7.81  
7.80  
7.69  
7.68  
7.67  
7.66  
7.65  
7.55  
7.53  
7.52  
7.49  
7.47  
7.44  
7.42  
7.34  
7.32  
7.31

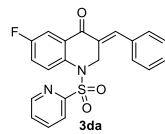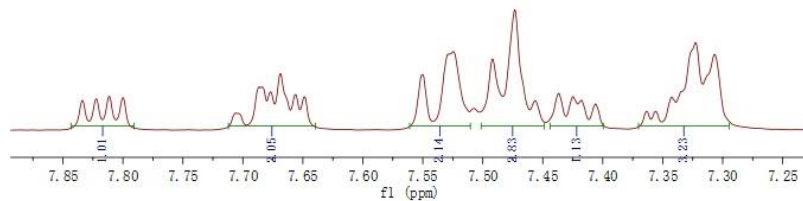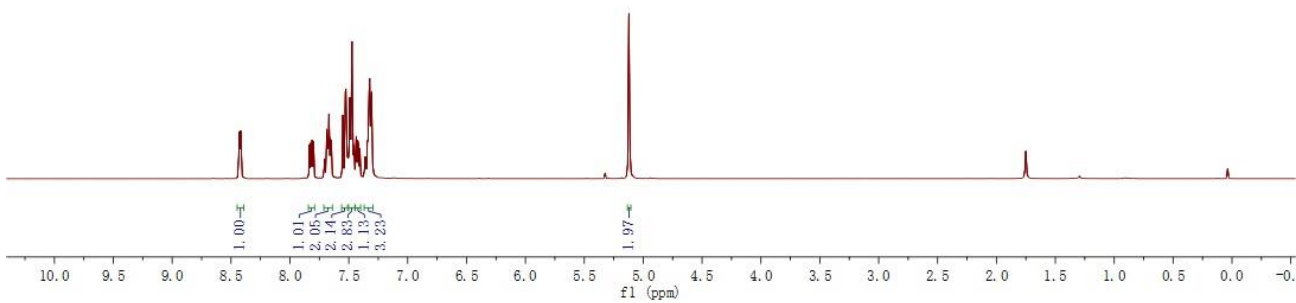

182.1  
162.4  
160.0  
156.0  
150.1  
138.3  
138.1  
134.0  
130.1  
130.0  
129.0  
128.7  
128.6  
127.1  
124.3  
114.1  
77.5  
77.2  
76.8  
48.2

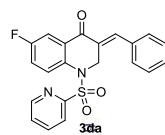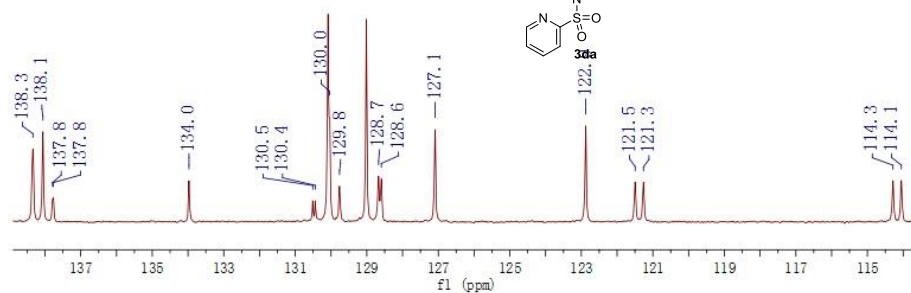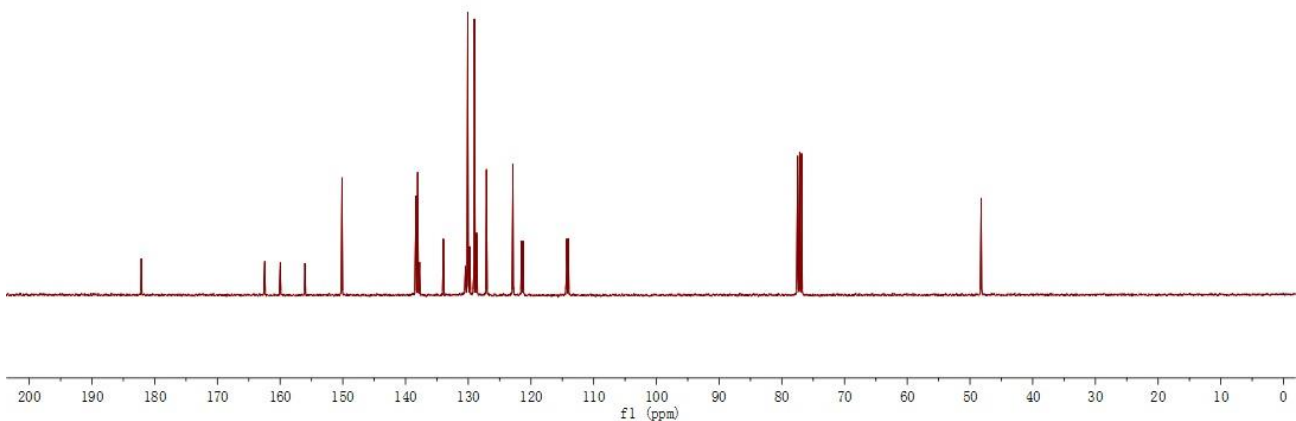



8.40  
8.39  
8.39  
8.28  
8.27  
7.93  
7.91  
7.81  
7.79  
7.79  
7.70  
7.69  
7.68  
7.67  
7.66  
7.65  
7.60  
7.58  
7.55  
7.45  
7.44  
7.42  
7.42  
7.41  
7.41  
7.40  
7.40  
7.40  
7.39  
7.38  
7.38  
7.29  
7.29  
7.27  
7.26  
5.13  
5.12

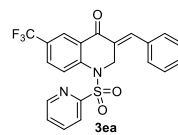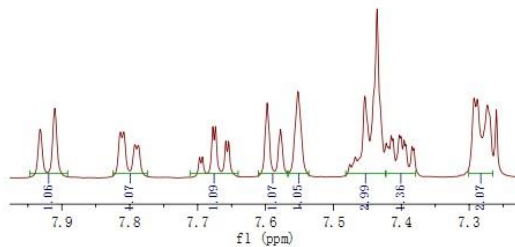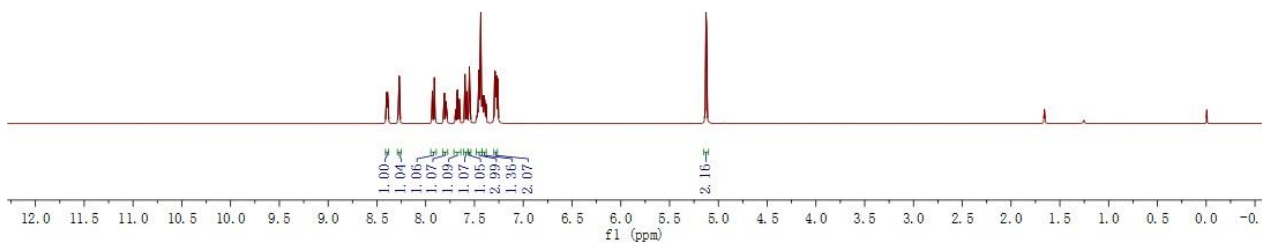

182.1  
156.2  
150.2  
144.6  
138.7  
138.3  
133.8  
130.5  
130.5  
130.2  
130.1  
129.5  
129.3  
129.0  
129.0  
128.7  
128.7  
128.4  
127.7  
127.3  
126.3  
125.8  
125.7  
124.9  
122.8  
122.2  
119.5

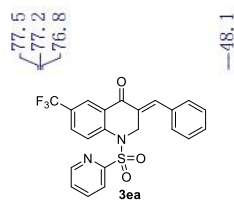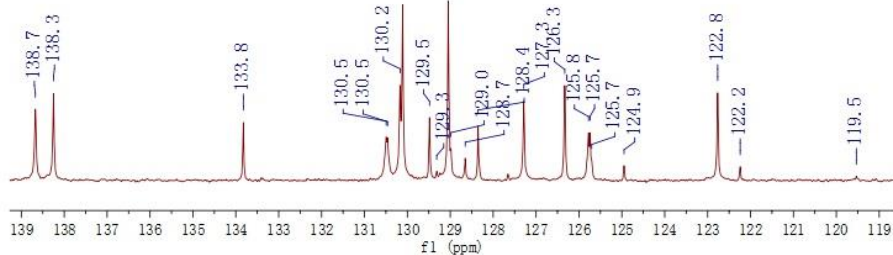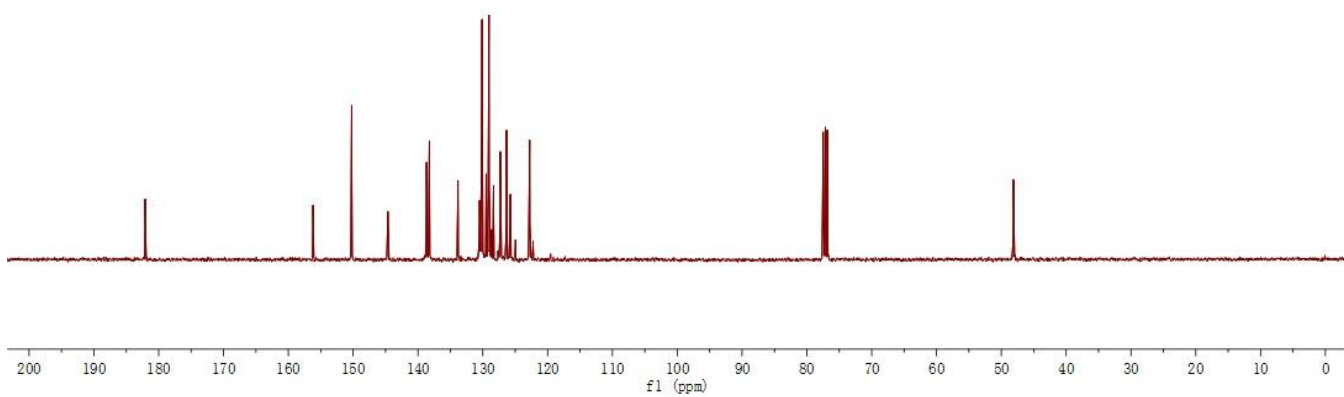



8.56  
8.55  
8.41  
8.40  
8.18  
8.17  
8.15  
8.15  
7.88  
7.86  
7.68  
7.66  
7.62  
7.60  
7.58  
7.46  
7.44  
7.42  
7.41  
7.41  
7.40  
7.40  
7.39  
7.39  
7.38  
7.31  
7.31  
7.29  
7.29  
5.14

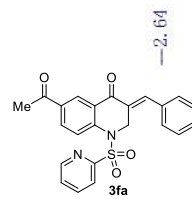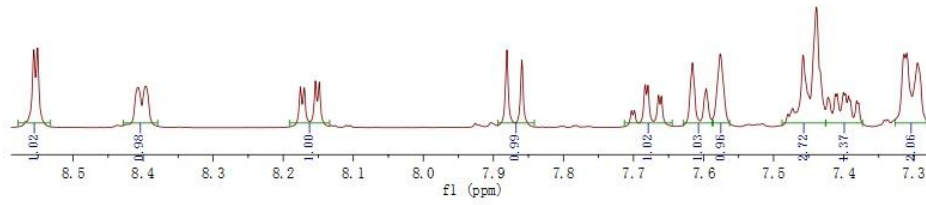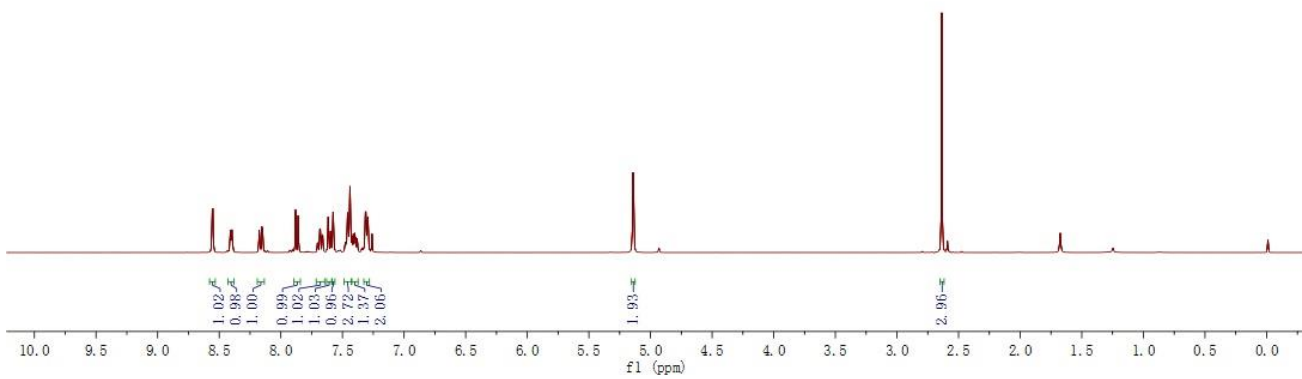

196.5  
182.6  
156.3  
150.2  
145.6  
138.5  
138.2  
135.0  
134.0  
133.3  
130.1  
129.7  
129.1  
129.0  
127.9  
127.3  
125.7  
122.8  
77.5  
77.2  
76.8  
48.2  
26.8

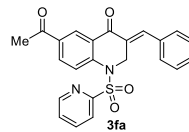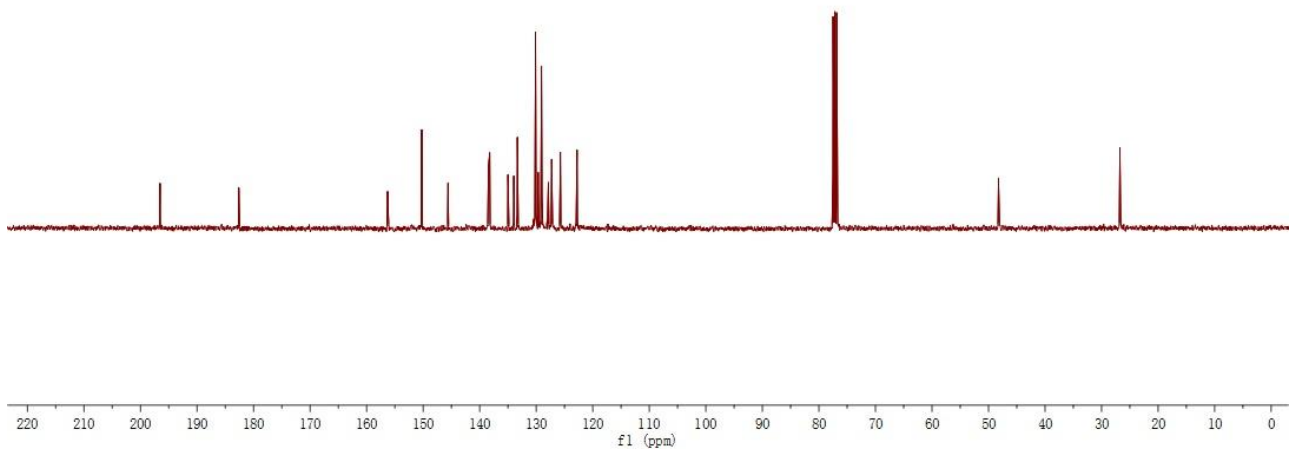

8.66  
8.65  
8.40  
8.40  
8.39  
8.39  
8.22  
8.22  
8.20  
8.20

7.86  
7.84  
7.67  
7.67  
7.65  
7.60  
7.57  
7.45  
7.44  
7.40  
7.40  
7.39  
7.39  
7.31  
7.31  
7.29  
7.29  
5.14  
5.14

-3.93

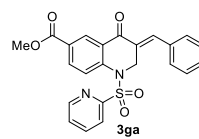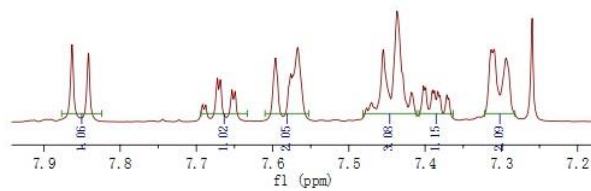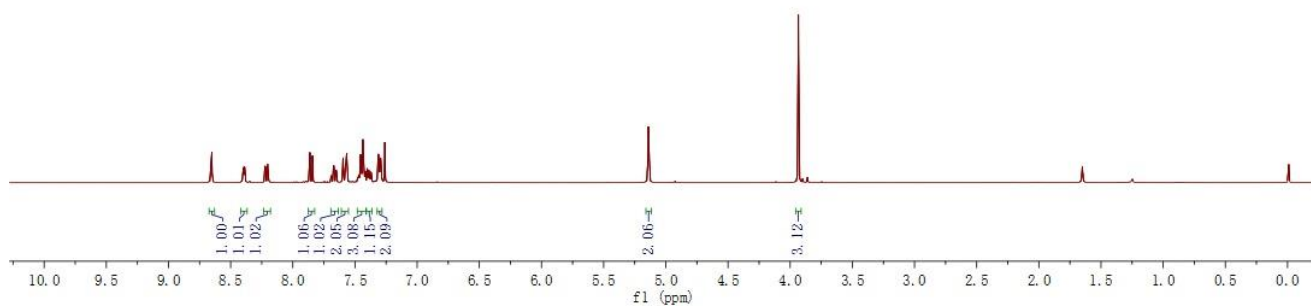

-182.5

-165.9

156.2  
150.2  
145.4  
138.4  
138.2  
134.8  
134.0  
130.1  
129.7  
129.1  
128.4  
128.4  
128.0  
127.2  
125.6  
122.8

77.5  
77.2  
76.8

-52.5  
-48.2

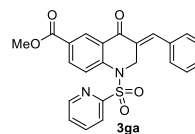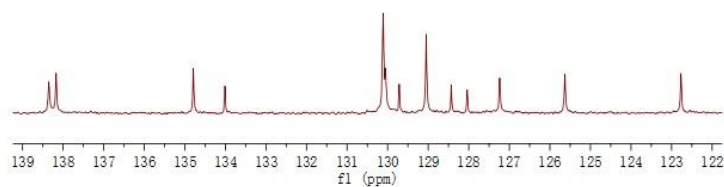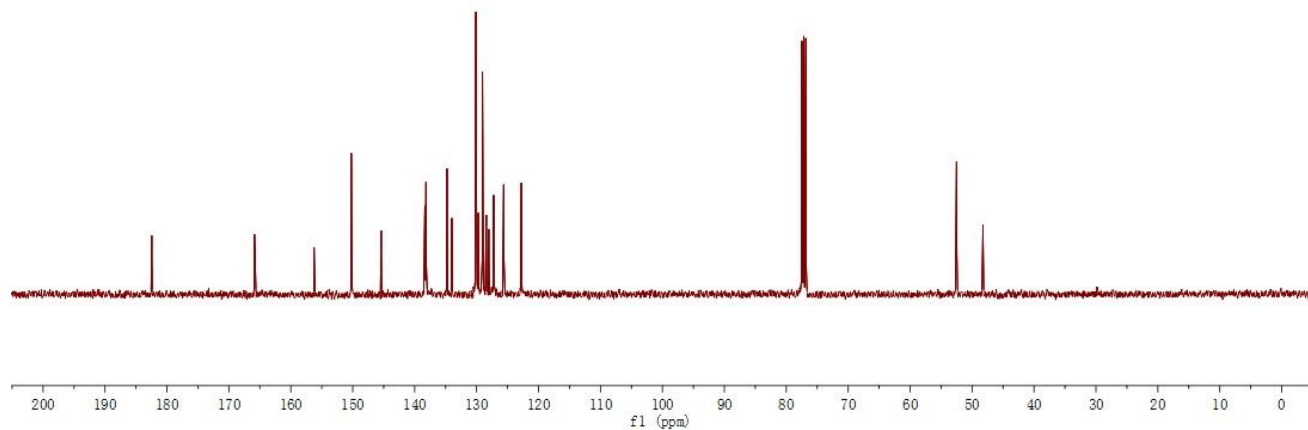

8.40  
8.39  
8.22  
8.22  
7.85  
7.84  
7.83  
7.64  
7.63  
7.61  
7.56  
7.53  
7.47  
7.45  
7.44  
7.43  
7.37  
7.31  
7.29  
5.16  
5.13

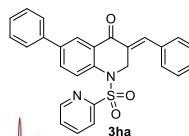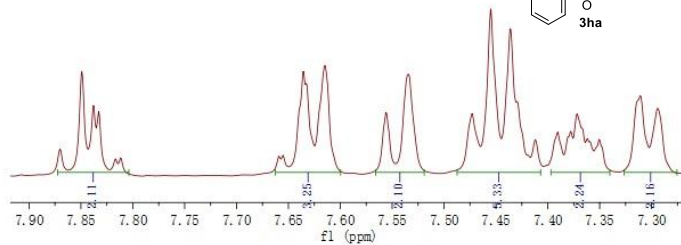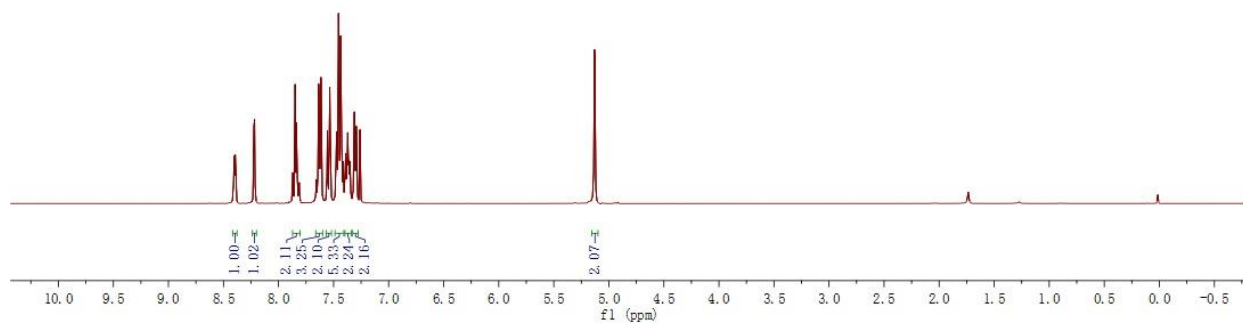

183.0

156.1

150.7

139.8

139.2

138.0

137.8

134.1

132.6

130.3

130.0

129.8

129.0

128.9

128.8

128.8

128.0

127.0

126.6

126.4

122.8

77.5

77.2

76.8

48.2

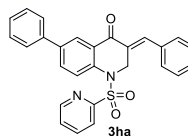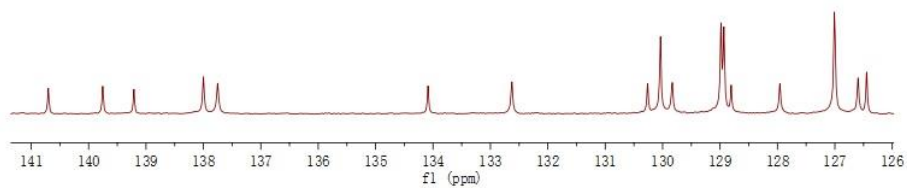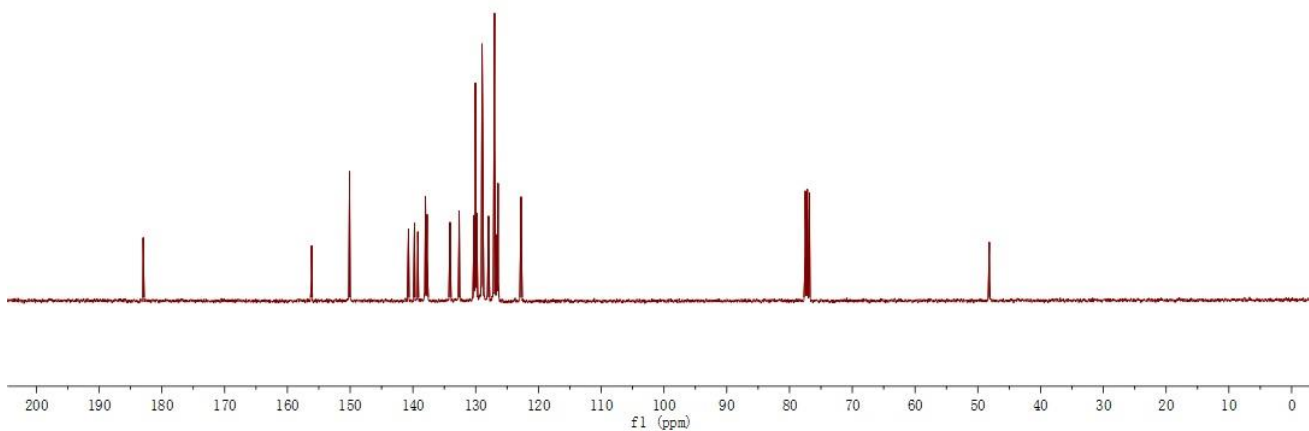

8.39  
8.38  
7.92  
7.90  
7.79  
7.78  
7.65  
7.65  
7.55  
7.53  
7.49  
7.44  
7.42  
7.32  
7.31  
7.30  
7.29  
7.27  
7.26  
5.07  
5.07

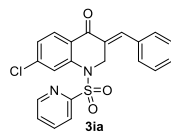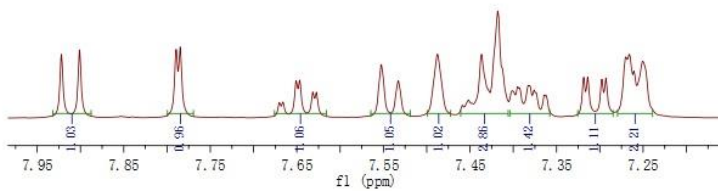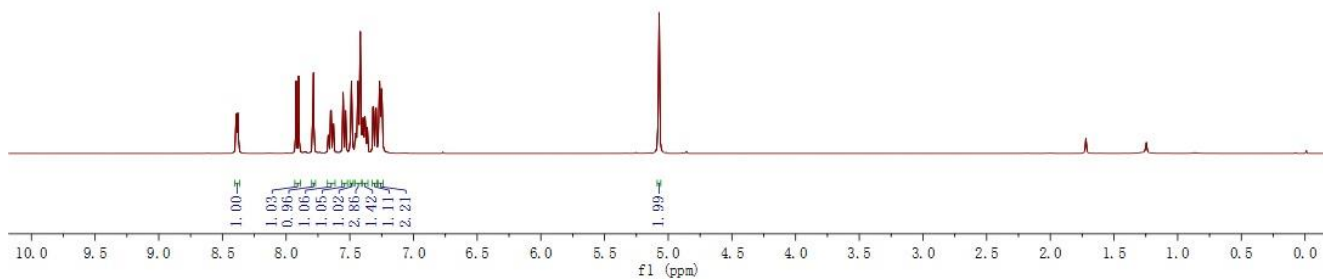

182.2

156.1  
150.6  
140.3  
138.1  
138.0  
134.0  
130.0  
130.0  
129.8  
129.5  
129.0  
127.3  
127.2  
126.9  
126.0  
122.8

77.5  
77.2  
76.8

48.2

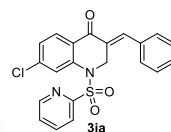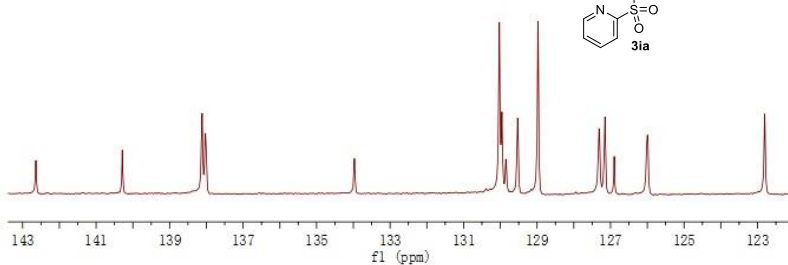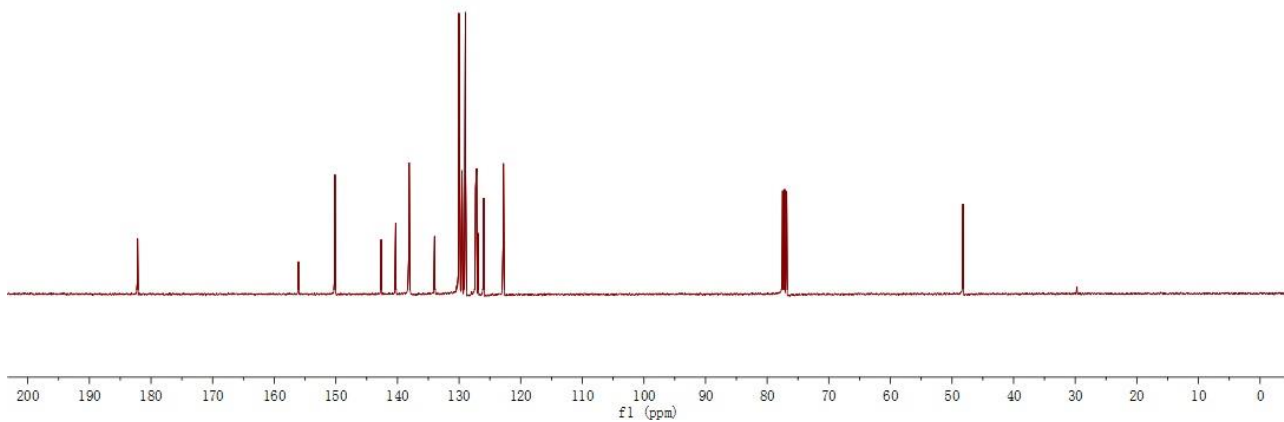

8.44  
8.44  
8.43  
8.42

8.00  
7.99  
7.88  
7.86  
7.70  
7.69  
7.57  
7.53  
7.53  
7.52  
7.51  
7.48  
7.46  
7.31  
7.30  
7.29  
7.29  
5.11

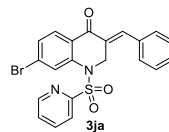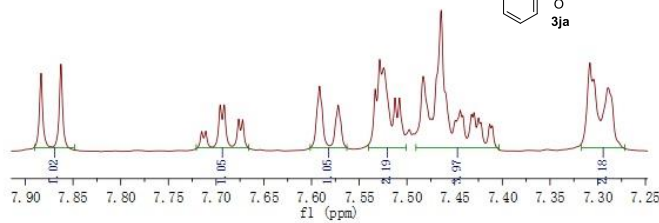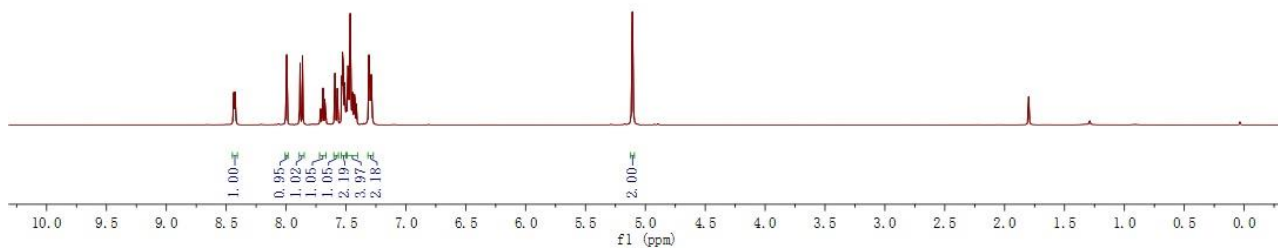

182.3

156.0

152.5  
152.5  
138.1  
138.0  
133.9  
130.3  
130.0  
130.0  
129.8  
129.5  
129.0  
128.9  
127.3  
127.2  
122.8

77.5  
77.2  
76.8

48.2

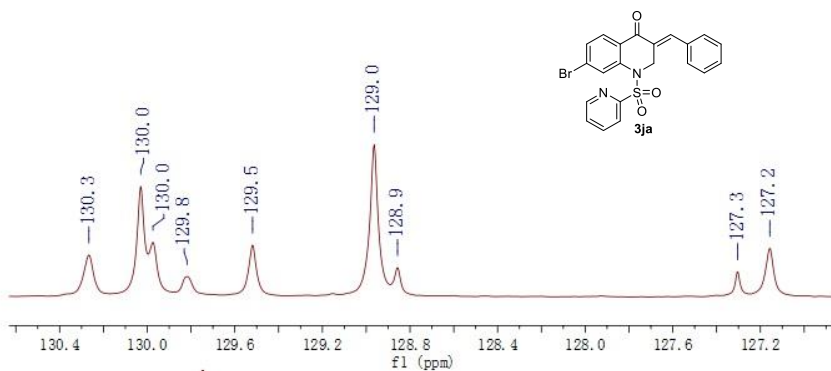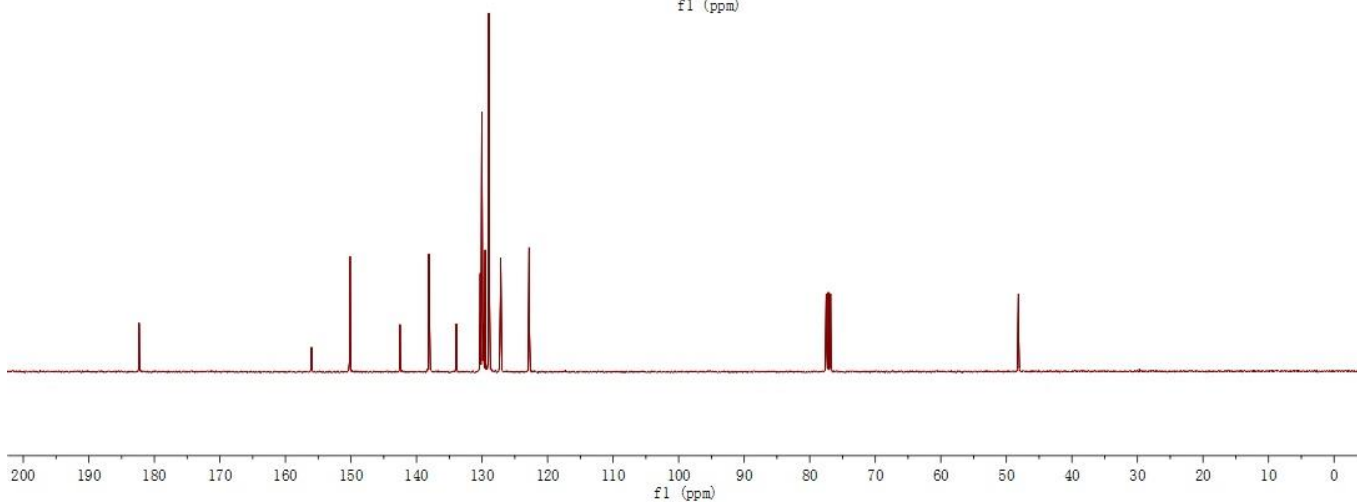

8.38  
8.37  
7.62  
7.46  
7.44  
7.42  
7.40  
7.39  
7.38  
7.36  
7.31  
7.24  
7.22  
7.04  
5.01  
5.00

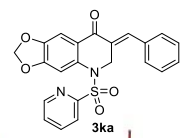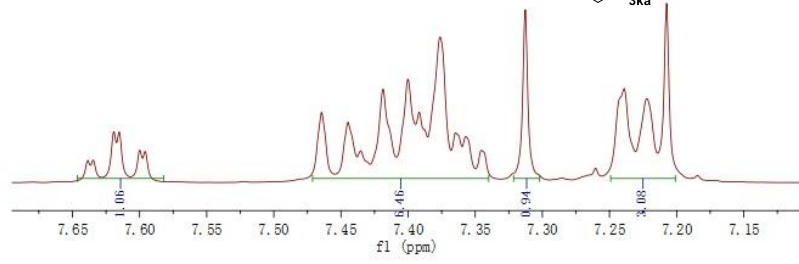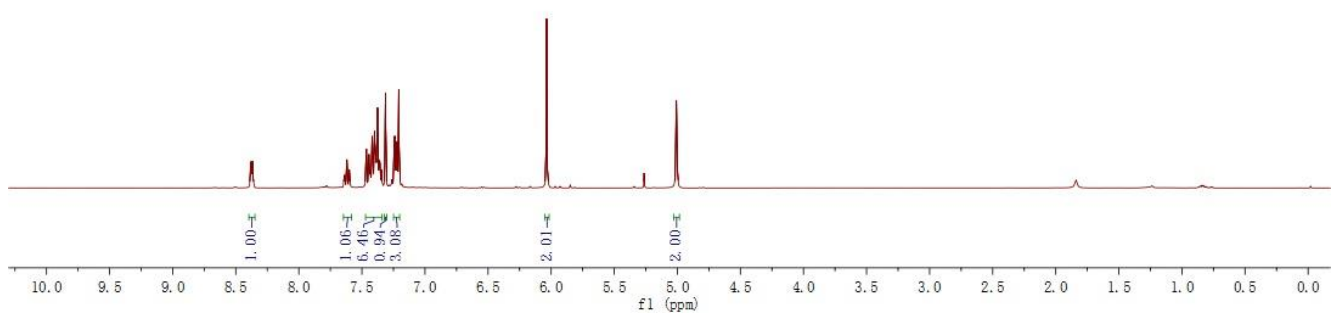

181.4  
155.6  
152.5  
150.1  
147.1  
138.3  
137.9  
137.2  
134.2  
129.9  
129.7  
128.9  
127.0  
123.7  
122.9  
107.1  
106.3  
102.4  
77.5  
77.2  
76.8  
48.3

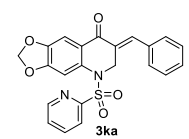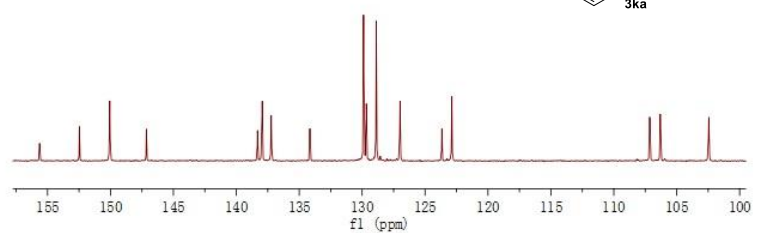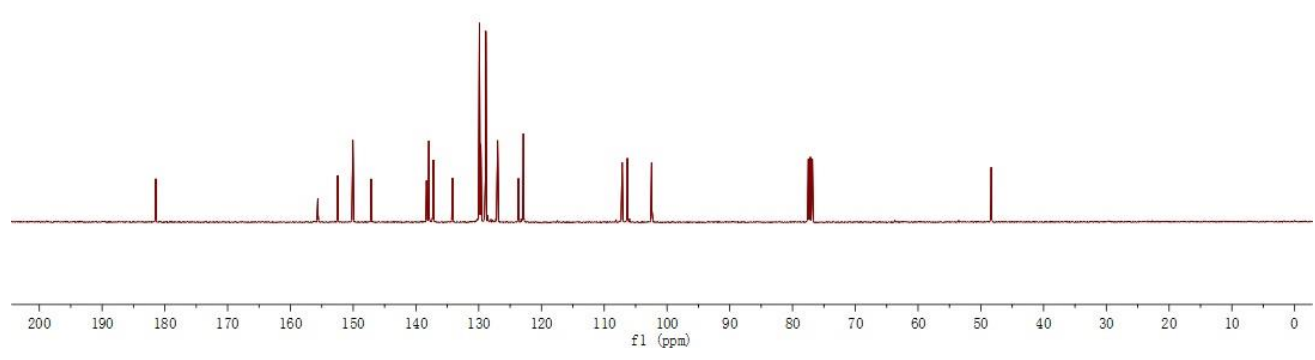

8.43  
8.42  
7.76  
7.66  
7.65  
7.64  
7.58  
7.53  
7.51  
7.50  
7.48  
7.47  
7.46  
7.45  
7.44  
7.41  
7.40  
7.40  
7.31  
7.30  
5.08

2.40  
2.33

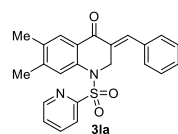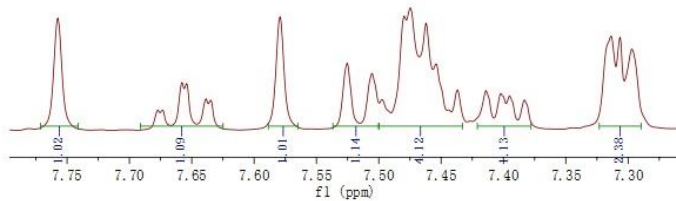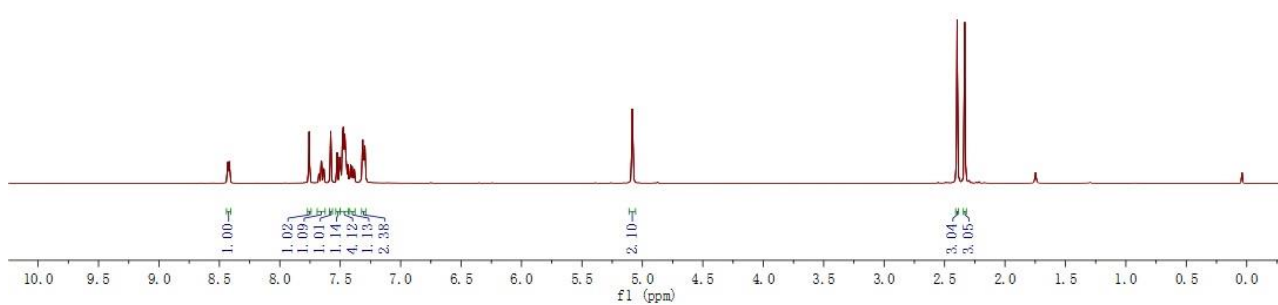

182.9

156.1  
150.1  
144.4  
139.5  
137.9  
137.2  
136.2  
134.2  
130.5  
130.0  
129.7  
128.9  
128.8  
127.3  
126.9  
126.6  
122.9

77.5  
77.2  
76.8

48.3

20.7  
19.4

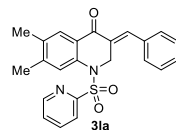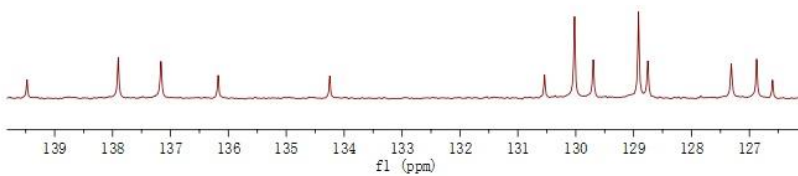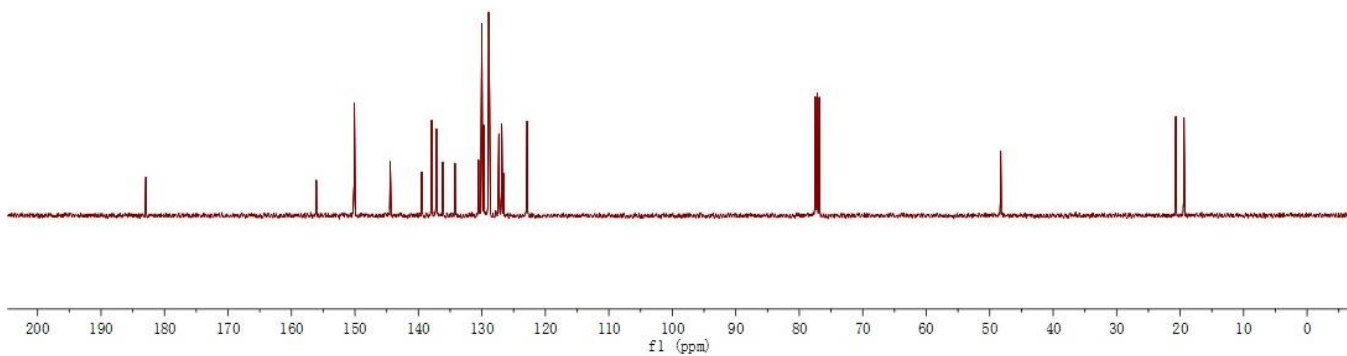

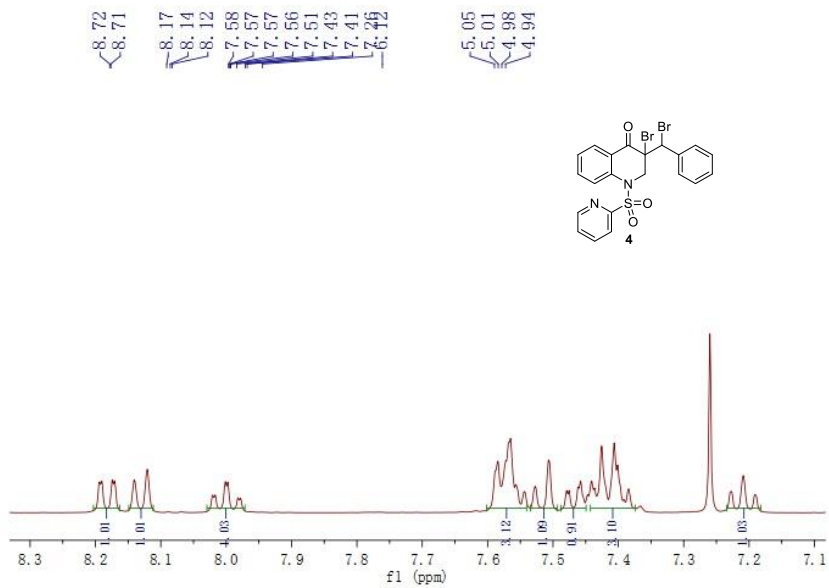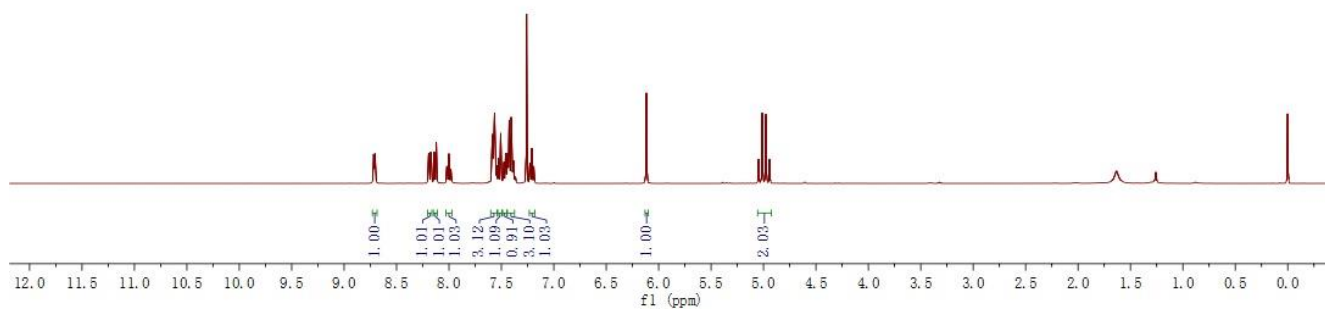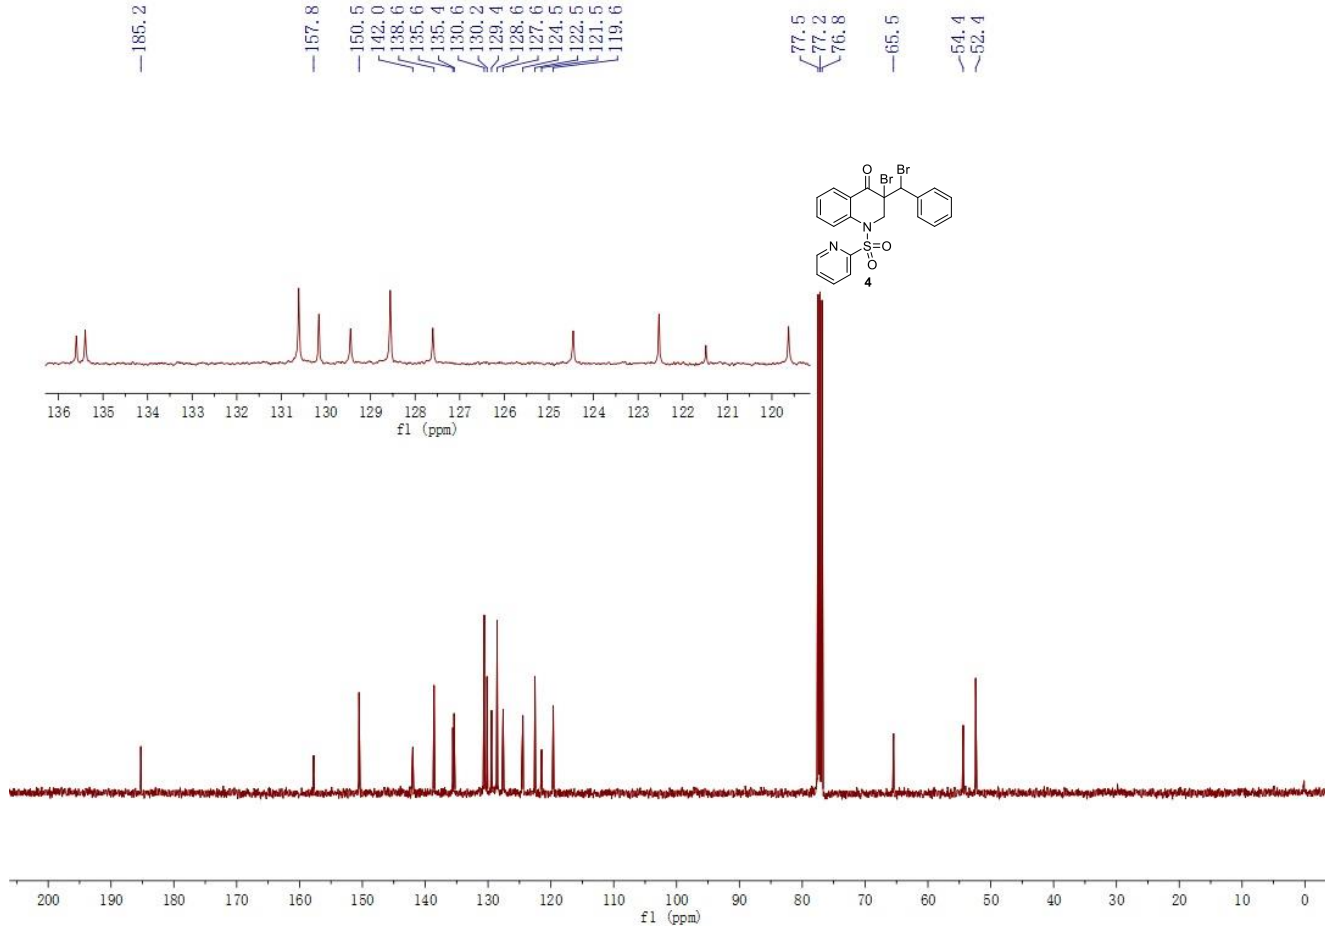



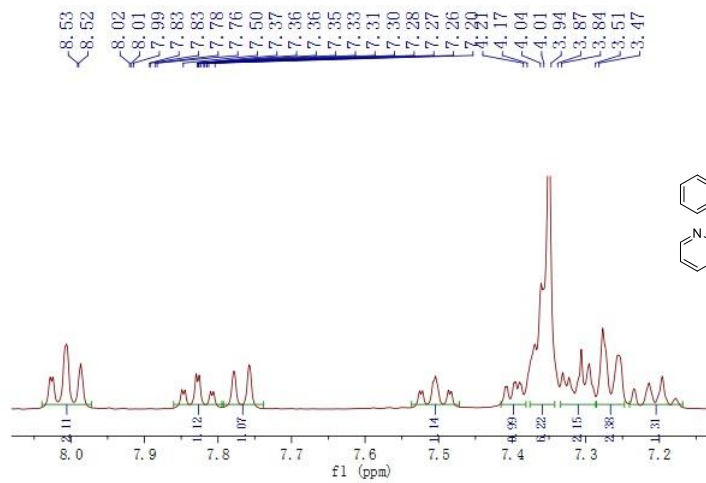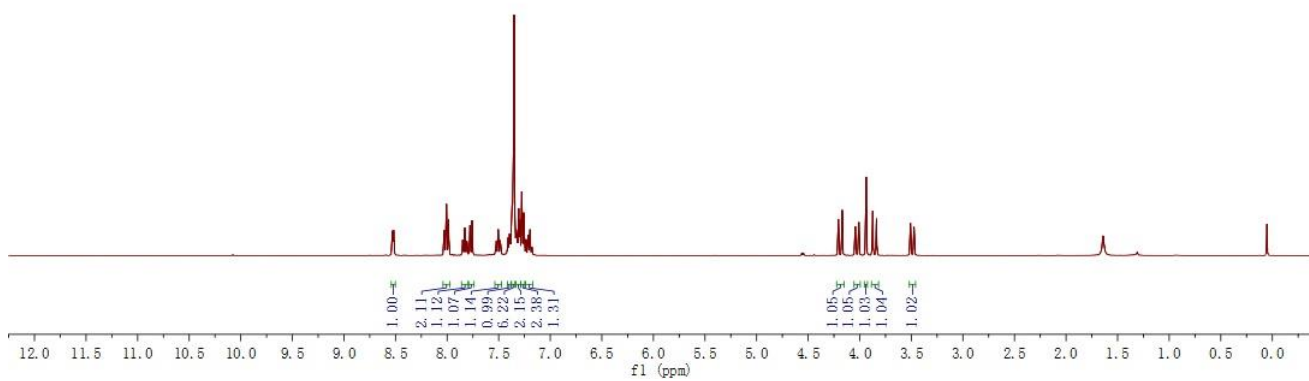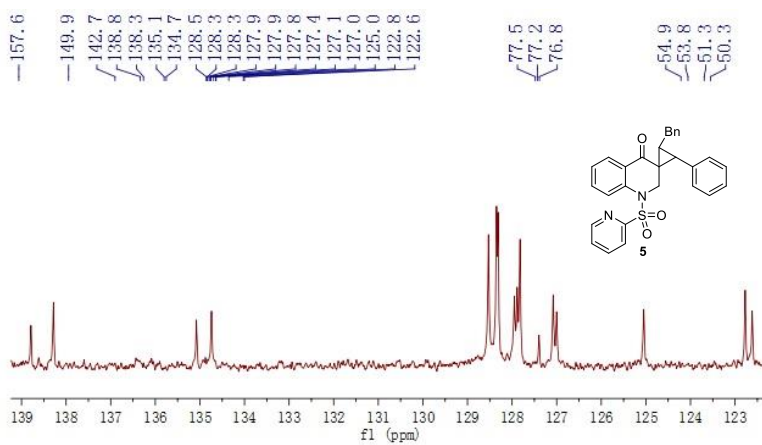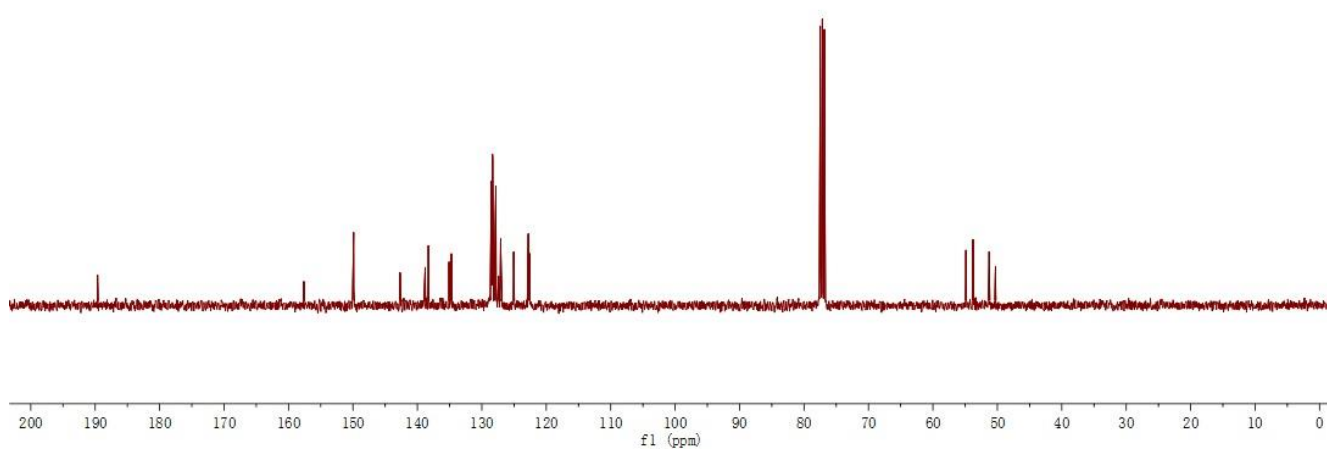

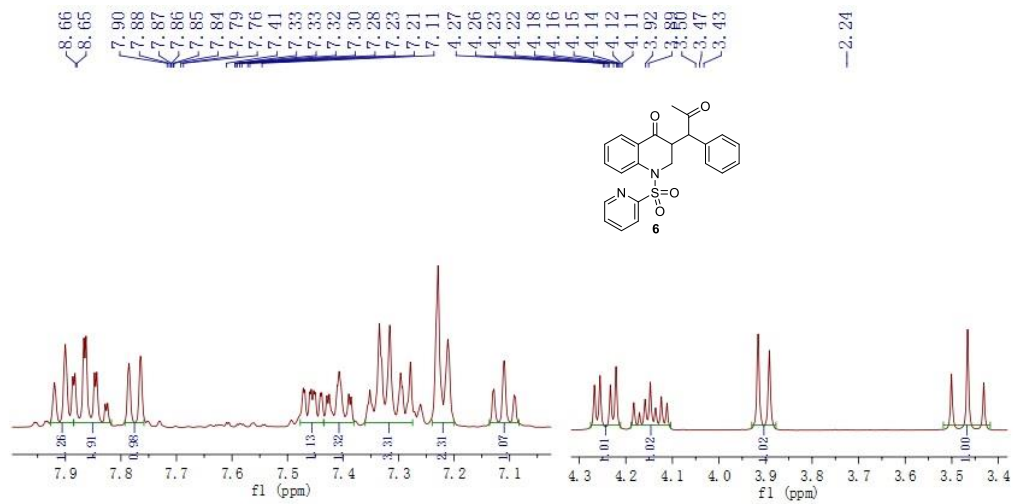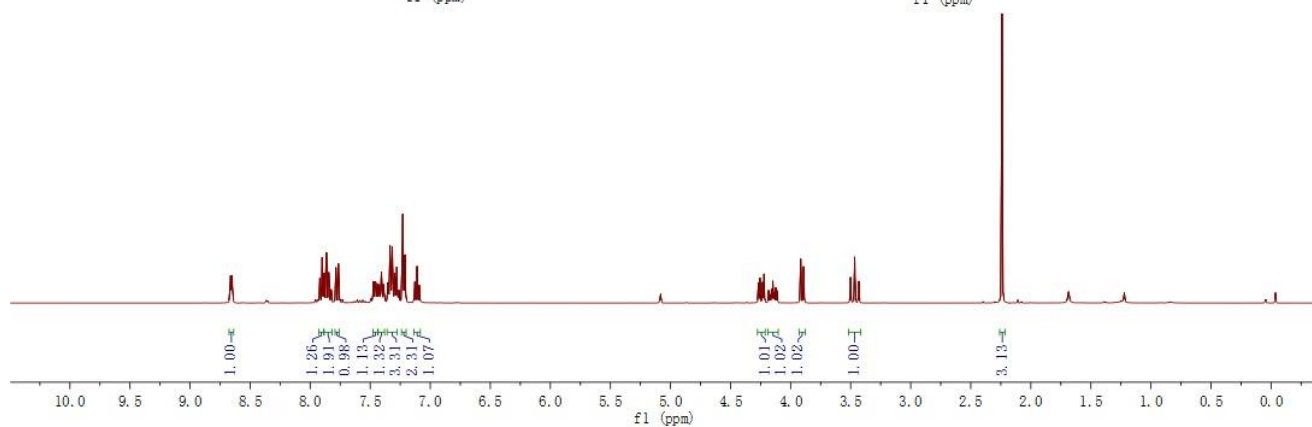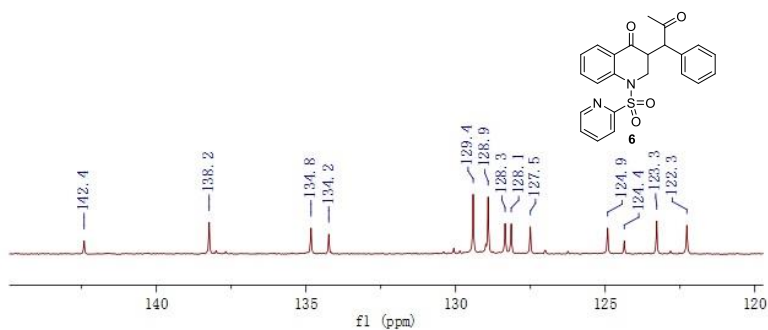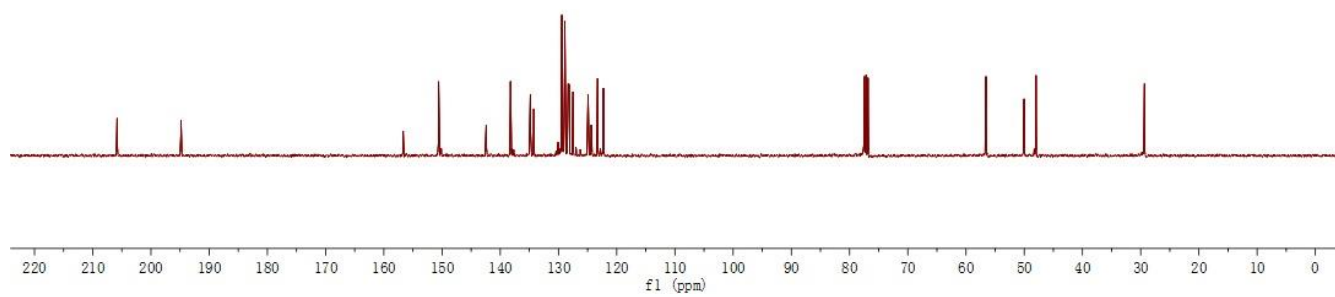

7.84  
7.83  
7.82  
7.81  
7.37  
7.32  
7.28  
6.76  
6.74  
6.66  
6.64

4.41  
4.06  
4.04  
3.81  
3.80  
3.79  
3.15  
3.12  
3.11  
3.08  
3.07  
2.96

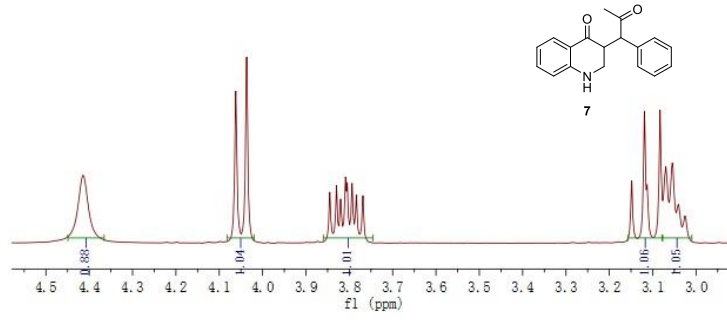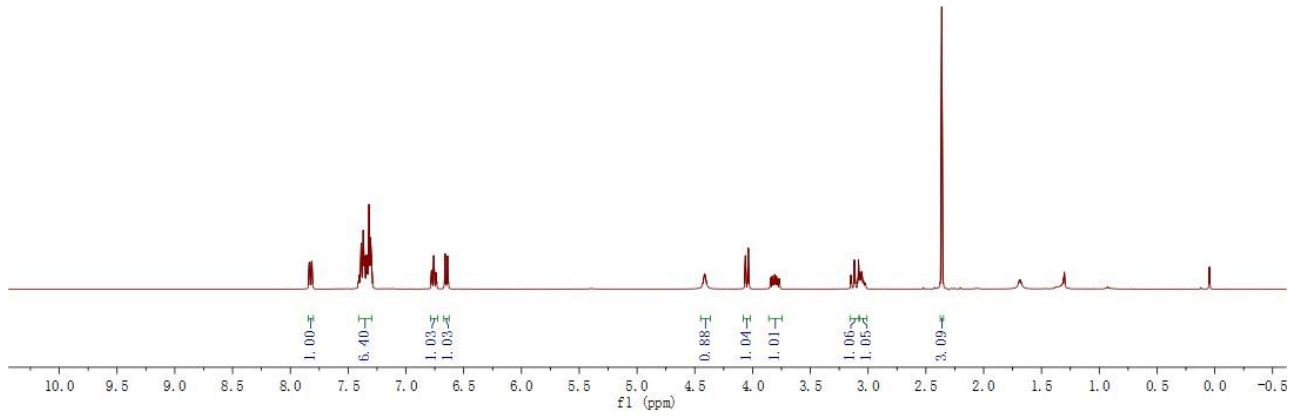

206.6

194.9

151.6

135.4

135.3

129.2

128.9

128.0

127.9

118.8

118.0

115.6

77.5

77.2

76.8

56.7

48.8

45.4

29.8

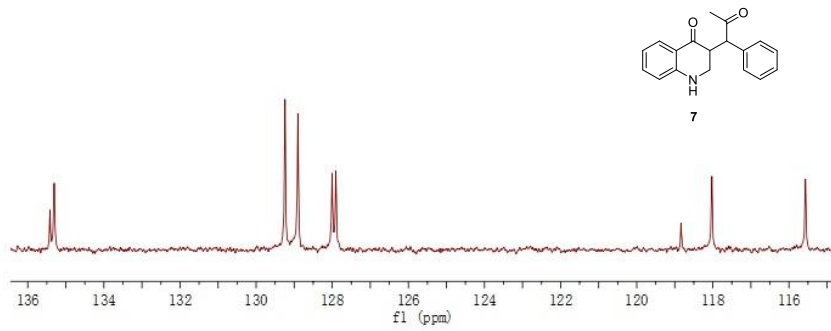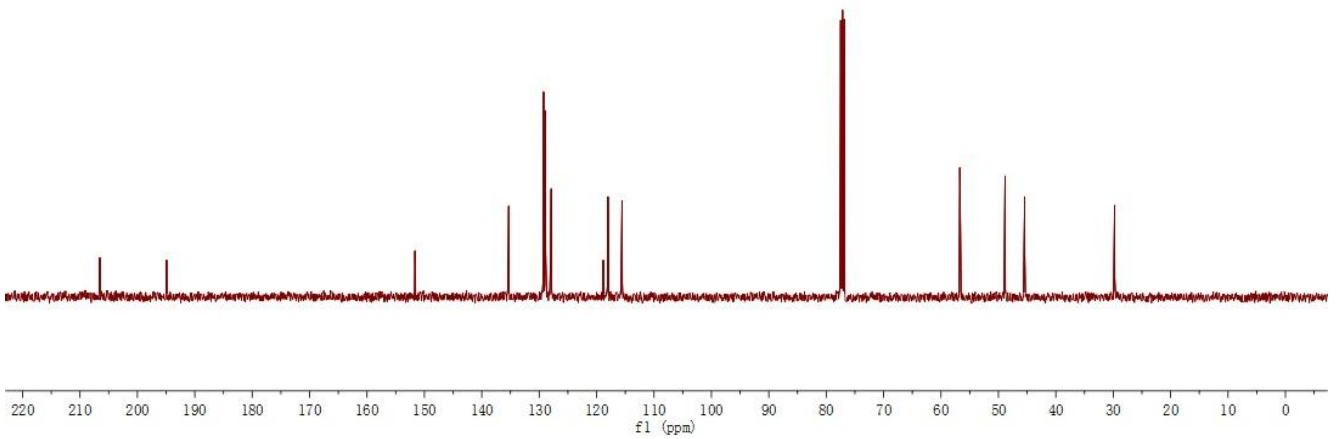

-11.04

8.46  
8.44  
7.98  
7.97  
7.96  
7.95  
7.59  
7.59  
7.57  
7.55  
7.55  
7.15  
7.13  
7.11  
7.11

-3.34

-2.50

-2.13

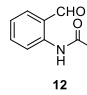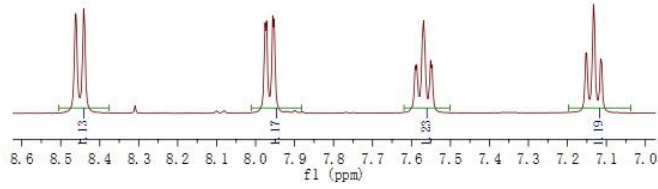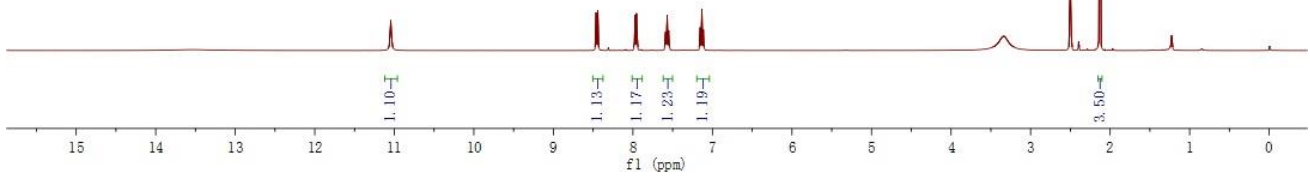

169.4  
168.4

140.8

133.9

131.0

122.5

119.9

116.5

39.5

25.0

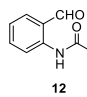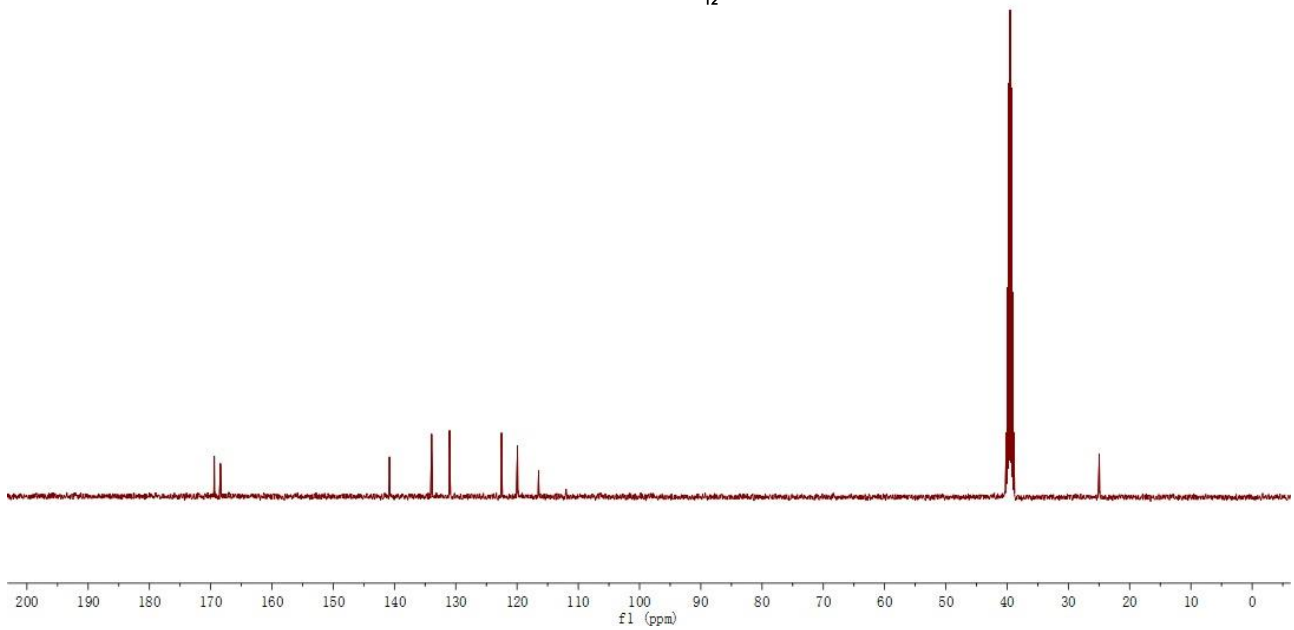

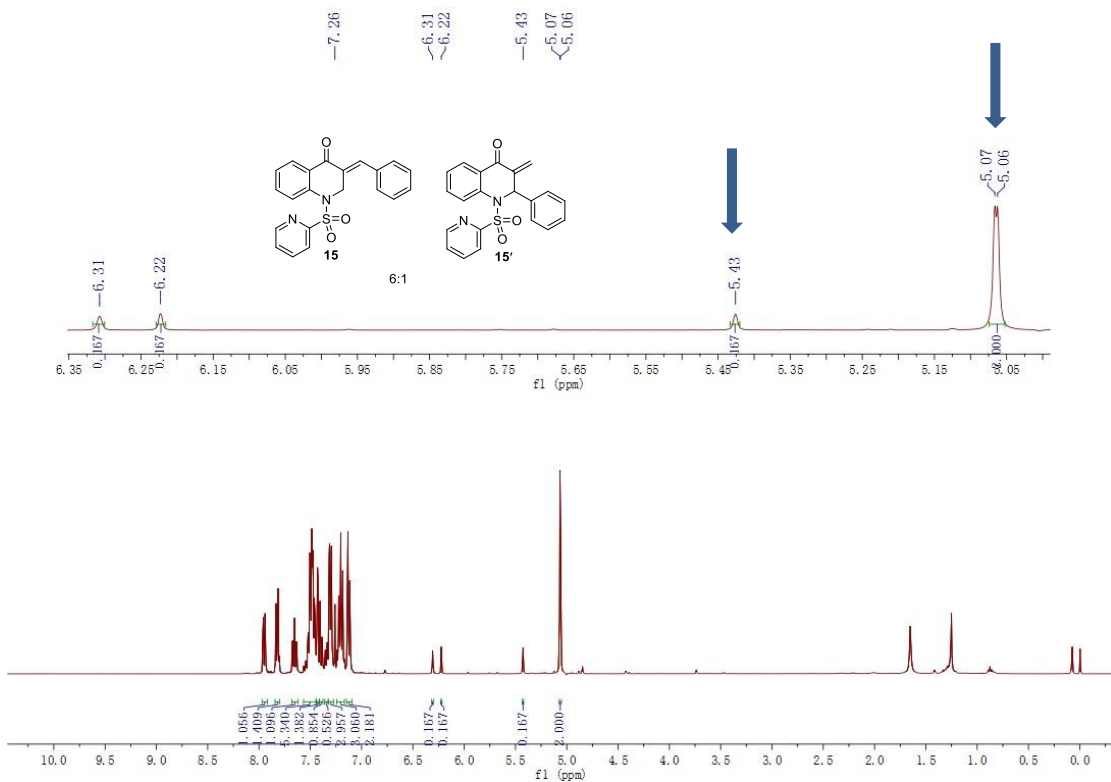

8.85  
8.84  
7.90  
7.89  
7.88  
7.31  
7.30  
7.30  
7.28  
7.28  
7.26  
7.26  
6.43  
6.41  
6.40  
6.39  
6.37  
6.36  
6.32  
6.28  
4.73  
4.71  
4.69  
4.68  
4.61  
4.60  
4.58  
4.56

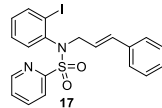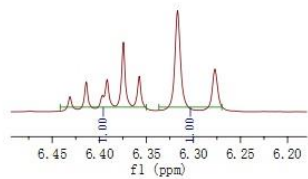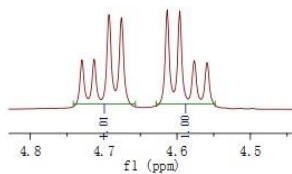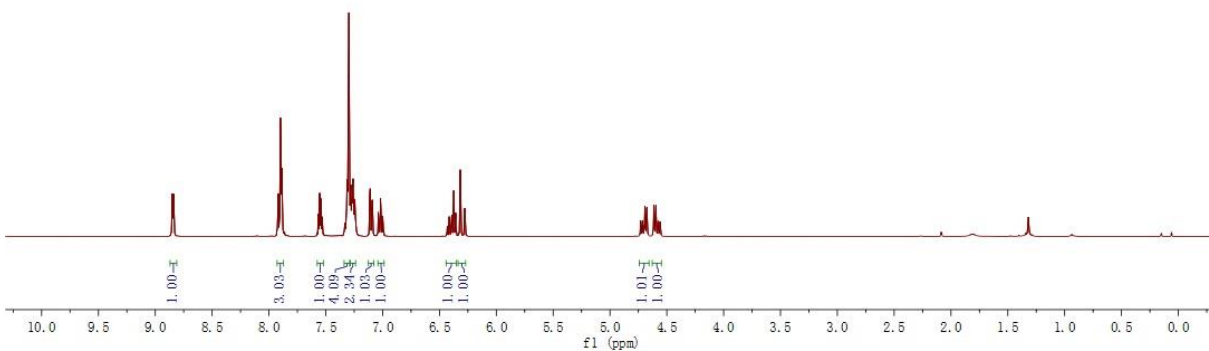

158.2  
150.1  
141.1  
140.3  
138.0  
136.3  
134.5  
131.7  
130.1  
128.9  
128.5  
127.9  
126.5  
126.5  
123.8  
123.1  
102.8

77.5  
77.2  
76.8

55.3

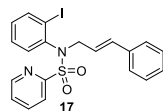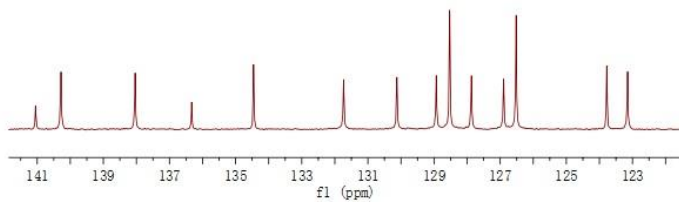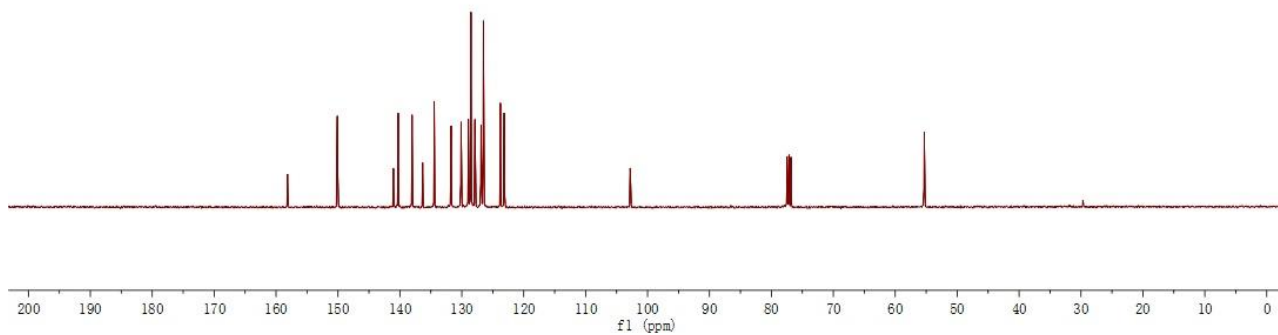

8.63  
8.61  
8.09  
8.07  
7.89  
7.89  
7.65  
7.63  
7.56  
7.54  
7.48  
7.47  
7.45  
7.40  
7.38  
7.33  
7.31  
7.24  
7.07  
6.90  
6.86  
6.85

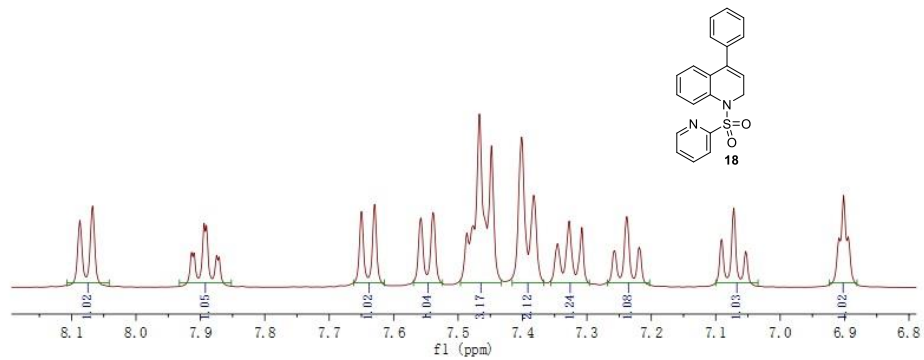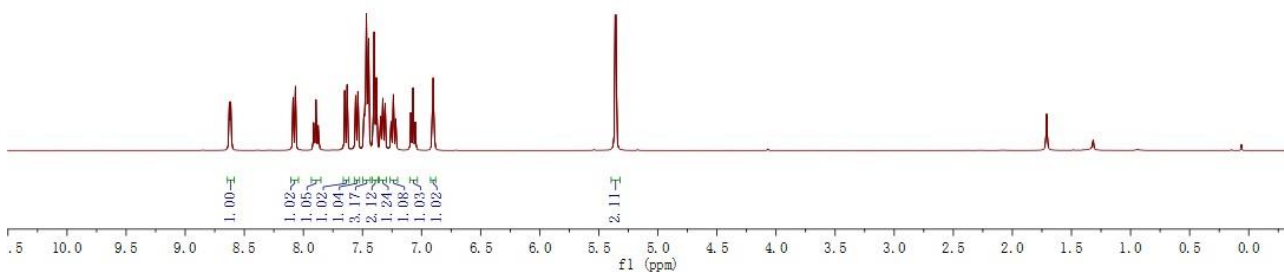

156.1  
150.4  
142.9  
138.0  
136.4  
132.7  
131.3  
129.7  
128.9  
128.5  
127.3  
123.8  
123.0  
120.4  
118.6  
114.3

77.5  
77.2  
76.8

56.2

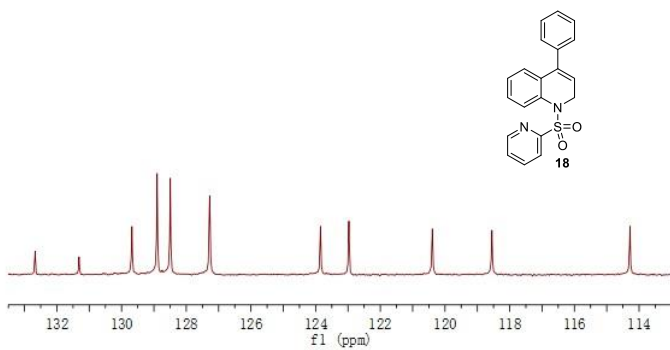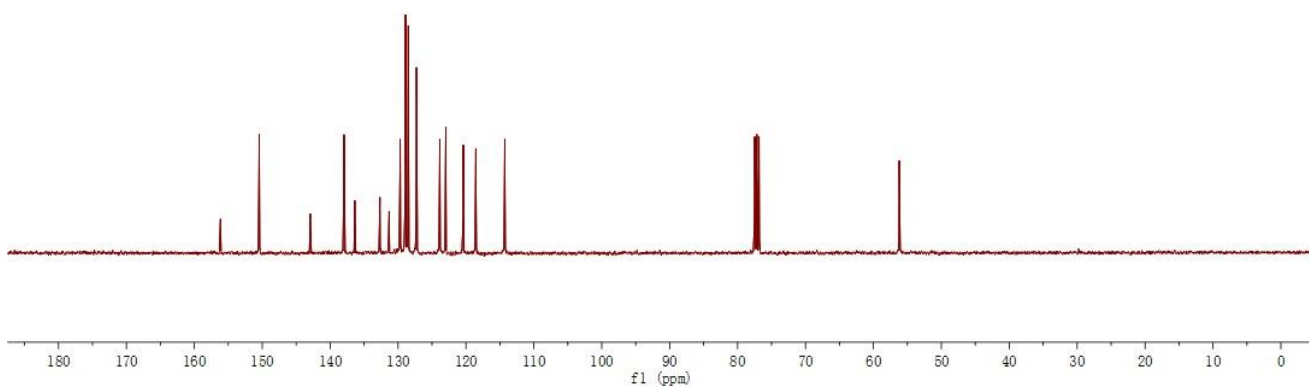

## 15. Computational Methods

All of the calculations were performed with the Gaussian 09 program.<sup>1</sup> The geometries of the different structures were optimized at the DFT level using the B3LYP<sup>2-3</sup> hybrid functional with a mixed basis set (BS1) of SDD<sup>4-5</sup> for Pd and I and 6-31G(d) for the other atoms. Harmonic vibrational frequency calculations were performed at the same level to determine whether the optimized structures are local minima or transition states and to derive thermochemical corrections for the enthalpy and free energy. The solvent effects were taken into consideration by single point calculations of the gas-phase stationary points with the SMD<sup>6-8</sup> continuum solvation model with toluene solvent. To obtain more accurate energy information, solvation single-point energy calculations were performed at the M06-L<sup>9</sup> level of theory using a larger basis set (BS2) of LANL08(f) for Pd, LANL08(d)<sup>10-11</sup> for I and 6-311+G(d,p) for the other atoms. The free energies ( $\Delta G_{M06-L(Toluene)}$ ) in the reported profiles were obtained by

$$\Delta G_{M06-L(Toluene)} = \Delta E_{M06-L(Toluene)} + \Delta G_{\text{correction}}$$

where  $\Delta G_{\text{correction}}$  is the thermochemical correction for the Gibbs free energy calculated at the B3-LYP/BS1 level in the gas phase and  $\Delta E_{M06-L(Toluene)}$  is the single-point energy calculated at the M06-L/BS2 level in toluene based on the gas-phase stationary point.

All of the three-dimensional molecular diagrams of the molecules were generated with CYLView.<sup>12</sup>

1. Frisch, M. J.; Trucks, G. W.; Schlegel, H. B.; Scuseria, G. E.; Robb, M. A.; Cheeseman, J. R.; Scalmani, G.; Barone, V.; Mennucci, B.; Petersson, G. A.; Nakatsuji, H.; Caricato, M.; Li, X.; Hratchian, H. P.; Izmaylov, A. F.; Bloino, J.; Zheng, G.; Sonnenberg, J. L.; Hada, M.; Ehara, M.; Toyota, K.; Fukuda, R.; Hasegawa, J.; Ishida, M.; Nakajima, T.; Honda, Y.; Kitao, O.; Nakai, H.; Vreven, T.; Montgomery, Jr., J. A.; Peralta, J. E.; Ogliaro, F.; Bearpark, M.; Heyd, J. J.; Brothers, E.; Kudin, K. N.; Staroverov, V. N.; Keith, T.; Kobayashi, R.; Normand, J.; Raghavachari, K.; Rendell, A.; Burant, J. C.; Iyengar, S. S.; Tomasi, J.; Cossi, M.; Rega, N.; Millam, J. M.; Klene, M.; Knox, J. E.; Cross, J. B.; Bakken, V.; Adamo, C.; Jaramillo, J.; Gomperts, R.; Stratmann, R. E.; Yazyev, O.; Austin, A. J.; Cammi, R.; Pomelli, C.; Ochterski, J. W.; Martin, R. L.; Morokuma, K.; Zakrzewski, V. G.; Voth, G. A.; Salvador, P.; Dannenberg, J. J.; Dapprich, S.; Daniels, A. D.; Farkas, O.; Foresman, J. B.; Ortiz, J. V.; Cioslowski, J.; and Fox, D. J. Gaussian 09, revision E.01; Gaussian, Inc.: Wallingford, CT, **2013**.
2. Becke, A. D., Density-functional thermochemistry. III. The role of exact exchange. *J. Chem. Phys.* **1993**, *98* (7), 5648-5652.
3. Lee, C.; Yang, W.; Parr, R. G., Development of the Colle-Salvetti correlation-energy formula into a functional of the electron density. *Phys Rev B Condens Matter* **1988**, *37* (2), 785-789.
4. Andrae, D.; Huermann, U.; Dolg, M.; Stoll, H.; Preu, H., Energy-adjusted ab initio pseudopotentials for the second and third row transition elements: Molecular test for M2 (M=Ag, Au) and MH (M=Ru, Os). *Theor. Chim. Acta* **1991**, *78* (4), 247-266.
5. Dolg, M.; Wedig, U.; Stoll, H.; Preuss, H., Energy-adjusted ab initio pseudopotentials for the first row transition elements. *J. Chem. Phys.* **1987**, *86* (2), 866-872.
6. Cancès, E.; Mennucci, B.; Tomasi, J., A new integral equation formalism for the polarizable continuum model: Theoretical background and applications to isotropic and anisotropic dielectrics. *J. Chem. Phys.* **1997**, *107* (8), 3032-3041.
7. Cossi, M.; Barone, V.; Cammi, R.; Tomasi, J., Ab initio study of solvated molecules: a new implementation of the polarizable continuum model. *Chem. Phys. Lett.* **1996**, *255* (4-6), 327-335.
8. Marenich, A. V.; Cramer, C. J.; Truhlar, D. G., Universal solvation model based on solute electron density and on a continuum model of the solvent defined by the bulk dielectric constant and atomic surface tensions. *J. Phys. Chem. B* **2009**, *113* (18), 6378-96.
9. Zhao, Y.; Truhlar, D. G., Density functionals with broad applicability in chemistry. *Acc. Chem. Res.* **2008**, *41* (2), 157-67.
10. Check, C. E.; Faust, T. O.; Bailey, J. M.; Wright, B. J.; Gilbert, T. M.; Sunderlin, L. S., Addition of Polarization and Diffuse Functions to the LANL2DZ Basis Set for P-Block Elements. *J. Phys. Chem. A* **2001**, *105* (34), 8111-8116.
11. Roy, L. E.; Hay, P. J.; Martin, R. L., Revised Basis Sets for the LANL Effective Core Potentials. *J Chem Theory Comput* **2008**, *4* (7), 1029-31.
12. Legault CY. CYLView, b., Université de Sherbrooke, Canada, 2009.



For carbonylpalladium compound **25**, deprotonation can occur before allene insertion followed by reductive elimination. As shown in Figure S1, deprotonation occurs in the presence of  $\text{NEt}_3$  via transition state **34-ts** with a free energy barrier of only 12.6 kcal/mol. With the dissociation of  $\text{Et}_3\text{NHI}$ , five-membered palladacycle **35** is generated and undergoes allene insertion via transition state **36-ts** to give seven-membered palladacycle **37**. The activation free energy for allene insertion is 25.1 kcal/mol. Although it is 4.2 kcal/mol lower than that of the allene insertion in path I via transition state **27-ts**, the followed reductive elimination step is difficult to occur as the barrier via transition state **38-ts** is calculated to be high by 41.2 kcal/mol. Therefore, this path can be excluded.

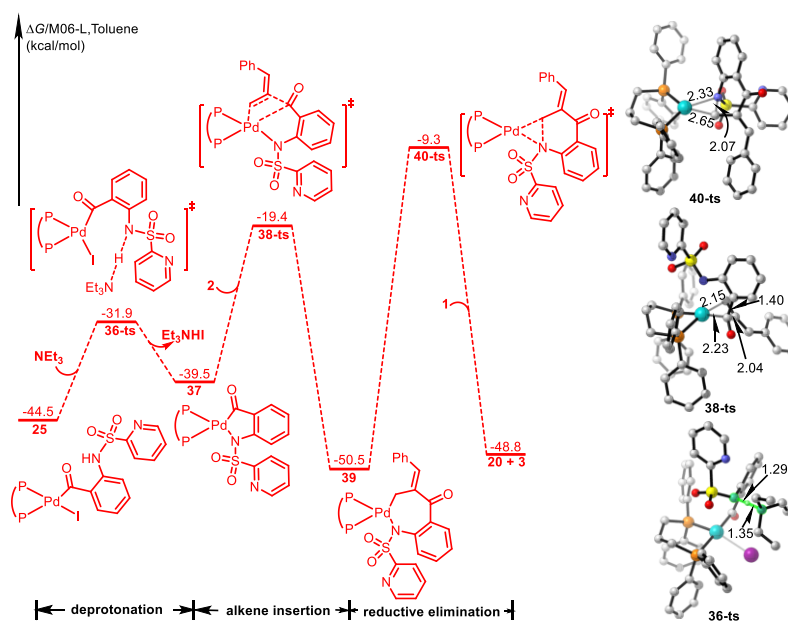

Figure S1 Free energy profiles of unfavored pathway of Palladium catalyzed regiospecific cyclocarbonylation of 2-iodoanilines and allenes. The energies are in kcal/mol and represent the relative free energies calculated with the DFT/M06-L method in toluene. The bond distances are in angstrom. The C-H bonds are omitted for clarity.

**Absolute calculated electronic energies, correction of enthalpies, and free Energies.**

| Geometry                 | $E_{(\text{elec-B3LYP})}^1$ | $G_{(\text{corr-B3LYP})}^2$ | $H_{(\text{corr-B3LYP})}^3$ | $E_{(\text{Toluene, M06-L})}^4$ | $IF^5$   |
|--------------------------|-----------------------------|-----------------------------|-----------------------------|---------------------------------|----------|
| <b>1</b>                 | -1094.04585                 | 0.141189                    | 0.202376                    | -1094.150881                    |          |
| <b>2</b>                 | -347.710453                 | 0.105438                    | 0.146662                    | -347.761035                     |          |
| <b>3</b>                 | -1543.12512                 | 0.275142                    | 0.352243                    | -1543.343014                    |          |
| <b>19</b>                | -1855.18949                 | 0.389572                    | 0.482948                    | -1854.227652                    |          |
| <b>20</b>                | -2949.252123                | 0.550432                    | 0.686853                    | -2948.411929                    |          |
| <b>21-ts</b>             | -2949.232941                | 0.551198                    | 0.685536                    | -2948.396056                    | -168.82  |
| <b>22</b>                | -2949.299016                | 0.555441                    | 0.687984                    | -2948.463157                    |          |
| <b>23</b>                | -3062.61024                 | 0.561259                    | 0.698499                    | -3061.805962                    |          |
| <b>24-ts</b>             | -3062.59432                 | 0.560598                    | 0.697435                    | -3061.78661                     | -249.47  |
| <b>25</b>                | -3062.647255                | 0.563972                    | 0.70007                     | -3061.836185                    |          |
| <b>26</b>                | -3410.326356                | 0.692085                    | 0.849333                    | -3409.584886                    |          |
| <b>27-ts</b>             | -3410.315058                | 0.6953                      | 0.848277                    | -3409.576396                    | -319.62  |
| <b>28</b>                | -3410.360757                | 0.696669                    | 0.850442                    | -3409.613827                    |          |
| <b>29</b>                | -3410.364598                | 0.698516                    | 0.851333                    | -3409.621627                    |          |
| <b>30-ts</b>             | -3702.780414                | 0.895083                    | 1.067745                    | -3702.084507                    | -988.58  |
| <b>31</b>                | -3398.316976                | 0.687909                    | 0.835254                    | -3397.604115                    |          |
| <b>32-ts</b>             | -3398.307137                | 0.688678                    | 0.834412                    | -3397.590055                    | -347.53  |
| <b>33-ts</b>             | -3410.302856                | 0.69714                     | 0.847869                    | -3409.574246                    | -270.66  |
| <b>34</b>                | -3410.356157                | 0.697337                    | 0.851063                    | -3409.602665                    |          |
| <b>35</b>                | -1543.114199                | 0.274669                    | 0.351497                    | -1543.331779                    |          |
| <b>36-ts</b>             | -3355.047551                | 0.761403                    | 0.916477                    | -3354.291514                    | -1177.73 |
| <b>37</b>                | -3050.582443                | 0.55557                     | 0.684164                    | -3049.804921                    |          |
| <b>38-ts</b>             | -3398.272753                | 0.688512                    | 0.832311                    | -3397.561315                    | -331.97  |
| <b>39</b>                | -3398.318145                | 0.692517                    | 0.83528                     | -3397.6149                      |          |
| <b>40-ts</b>             | -3398.256864                | 0.686964                    | 0.833319                    | -3397.543729                    | -437.39  |
| <b>NEt<sub>3</sub></b>   | -292.409811                 | 0.172806                    | 0.217442                    | -292.450777                     |          |
| <b>Et<sub>3</sub>NHI</b> | -304.464015                 | 0.182558                    | 0.234484                    | -304.475541                     |          |
| <b>CO</b>                | -113.306914                 | -0.014102                   | 0.008341                    | -113.325765                     |          |

<sup>1</sup>The electronic energy calculated by B3-LYP in gas phase. <sup>2</sup> The thermal correction to Gibbs free energy calculated by B3-LYP in gas phase. <sup>3</sup> The thermal correction to enthalpy calculated by B3-LYP in gas phase <sup>4</sup>The electronic energy calculated by M06-L in toluene. <sup>5</sup>The B3-LYP calculated imaginary frequencies for the transition states.

## 6 B3-LYP Geometries for All the Optimized Compounds and Transition State.

1

|   |             |             |             |
|---|-------------|-------------|-------------|
| S | -1.44734100 | -0.66782000 | 1.03463800  |
| O | -1.37703200 | -2.12514700 | 1.17775000  |
| O | -1.41149900 | 0.23421900  | 2.18043100  |
| N | -0.19911300 | -0.28378400 | -0.05823300 |
| H | 0.30351800  | -1.14157000 | -0.27525100 |
| C | -2.95491700 | -0.31765500 | 0.08101400  |
| C | -3.81093900 | -1.37045000 | -0.23314300 |
| C | -4.97549700 | -1.05085400 | -0.93421400 |
| H | -3.56661100 | -2.38329900 | 0.06360500  |
| C | -4.27685100 | 1.24666100  | -0.90601500 |
| C | -5.21411200 | 0.27892700  | -1.27797300 |
| H | -5.68235700 | -1.82963100 | -1.20560500 |
| H | -4.42652200 | 2.29427900  | -1.15703700 |
| H | -6.10723100 | 0.56754000  | -1.82318400 |
| C | 0.59777800  | 0.88210300  | 0.02391600  |
| C | -0.00223800 | 2.14240300  | 0.18433000  |
| C | 1.99521500  | 0.83065400  | -0.10695100 |
| C | 0.77146900  | 3.29633400  | 0.23543500  |
| H | -1.08305700 | 2.19419000  | 0.25700200  |
| C | 2.77079200  | 1.98855900  | -0.08245900 |
| C | 2.15873400  | 3.22789600  | 0.09938800  |
| H | 0.28212100  | 4.25673400  | 0.36961400  |
| H | 3.84723600  | 1.92103700  | -0.19384400 |
| H | 2.76566800  | 4.12786200  | 0.13102400  |
| I | 3.02437600  | -1.05342000 | -0.37859200 |
| N | -3.16025900 | 0.95652700  | -0.23041800 |

2

|   |             |             |             |
|---|-------------|-------------|-------------|
| C | 1.54575200  | 1.44932800  | -0.00002000 |
| C | 0.23226100  | 0.98939300  | -0.00003800 |
| C | -0.04384600 | -0.38950600 | 0.00004600  |
| C | 1.03510500  | -1.28822800 | 0.00001100  |
| C | 2.35136700  | -0.82633900 | 0.00002100  |
| C | 2.61272200  | 0.54445600  | 0.00003400  |
| H | 1.74031400  | 2.51877400  | -0.00005700 |
| H | -0.59424700 | 1.69482900  | -0.00010700 |
| H | 0.83646200  | -2.35762600 | -0.00002500 |
| H | 3.17219200  | -1.53878200 | 0.00001000  |
| H | 3.63717300  | 0.90665900  | 0.00004600  |
| C | -1.42170200 | -0.91633800 | -0.00007200 |
| H | -1.51542700 | -2.00350900 | -0.00014500 |
| C | -2.52783000 | -0.20447900 | -0.00003200 |
| C | -3.62657500 | 0.50165000  | 0.00004600  |
| H | -4.11008000 | 0.81017200  | -0.92631400 |
| H | -4.10991800 | 0.80985800  | 0.92662100  |

3

|   |             |             |             |
|---|-------------|-------------|-------------|
| S | -1.13158500 | 1.19916300  | -1.55574300 |
| O | 0.09599300  | 1.82917400  | -2.04188000 |
| O | -2.36946000 | 1.27370500  | -2.33584600 |
| C | -1.52885800 | 1.87001900  | 0.08826500  |
| C | -2.69215800 | 2.61624100  | 0.26240600  |
| C | -2.91863800 | 3.14104500  | 1.53636600  |
| H | -3.37820100 | 2.76719500  | -0.56240100 |
| C | -0.86615100 | 2.11407900  | 2.24826900  |
| C | -1.99170900 | 2.88737500  | 2.54680800  |
| H | -3.80717000 | 3.73366700  | 1.73463200  |
| H | -0.12619500 | 1.88428500  | 3.01136800  |
| H | -2.13551200 | 3.27400800  | 3.55087600  |
| N | -0.63182700 | 1.61200700  | 1.03161600  |
| C | -3.91945000 | -2.31633400 | -0.68145500 |
| C | -2.99860600 | -1.46038100 | -1.28249200 |
| C | -1.72696200 | -1.29937300 | -0.71487900 |
| C | -1.38359400 | -2.01440000 | 0.45189600  |
| C | -2.32376600 | -2.87636500 | 1.03368500  |
| C | -3.58743200 | -3.02951300 | 0.47604200  |
| H | -4.90082700 | -2.43790400 | -1.13213800 |
| H | -3.25048400 | -0.91572200 | -2.18340700 |
| C | -0.04917200 | -1.85888300 | 1.09819400  |
| H | -2.03048500 | -3.40690500 | 1.93387400  |
| H | -4.30944500 | -3.70097000 | 0.93172900  |
| C | 0.66055800  | -0.82394700 | -1.13458200 |
| H | 1.26593900  | 0.01118200  | -1.48462400 |
| O | 0.14520200  | -2.26793700 | 2.24094300  |
| C | 1.02197000  | -1.21863800 | 0.27894500  |
| C | 2.23812300  | -1.08349800 | 0.85605000  |
| H | 2.27304700  | -1.41150500 | 1.89447600  |
| N | -0.75524200 | -0.43837200 | -1.30157900 |
| H | 0.82901500  | -1.66445000 | -1.82418500 |
| C | 3.49608100  | -0.55024800 | 0.33337500  |
| C | 3.84686200  | -0.52130100 | -1.03168500 |
| C | 4.43578400  | -0.06214800 | 1.26546900  |
| C | 5.06967400  | 0.00546300  | -1.44343800 |
| H | 3.18247400  | -0.94636800 | -1.77515700 |
| C | 5.65172800  | 0.47384600  | 0.85276500  |
| H | 4.19203900  | -0.09834300 | 2.32434000  |
| C | 5.97231600  | 0.51336400  | -0.50680500 |
| H | 5.32067400  | 0.01243200  | -2.50055000 |
| H | 6.35306400  | 0.85409200  | 1.59052100  |
| H | 6.92344900  | 0.92531000  | -0.83265400 |

19

|   |             |             |            |
|---|-------------|-------------|------------|
| P | -1.93302400 | -0.21181300 | 0.04614700 |
|---|-------------|-------------|------------|

|   |             |             |             |
|---|-------------|-------------|-------------|
| C | -1.31775900 | -0.37107200 | 1.81800100  |
| H | -1.18990400 | -1.44950800 | 1.97351500  |
| H | -2.11369000 | -0.06191900 | 2.50799700  |
| C | -0.00024200 | 0.36407300  | 2.17054300  |
| H | -0.00035700 | 0.50684400  | 3.26011800  |
| H | -0.00038700 | 1.37251500  | 1.73806200  |
| C | 1.31753800  | -0.37065500 | 1.81821500  |
| H | 1.19011400  | -1.44909500 | 1.97408300  |
| H | 2.11342400  | -0.06096000 | 2.50803900  |
| P | 1.93287500  | -0.21183300 | 0.04628400  |
| C | 3.36927800  | -1.38570700 | 0.11376800  |
| C | 4.56969100  | -1.09310200 | 0.78030200  |
| C | 3.22947200  | -2.63498500 | -0.50911300 |
| C | 5.60191500  | -2.03105900 | 0.82662500  |
| H | 4.70384900  | -0.12444200 | 1.25458500  |
| C | 4.25901000  | -3.57715800 | -0.45617700 |
| H | 2.30830100  | -2.86033800 | -1.04222800 |
| C | 5.44763500  | -3.27596200 | 0.21093900  |
| H | 6.52829800  | -1.78946900 | 1.34183000  |
| H | 4.13553800  | -4.54090800 | -0.94358900 |
| H | 6.25342000  | -4.00458200 | 0.24620500  |
| C | 2.77175200  | 1.43935900  | 0.00285200  |
| C | 3.23215700  | 1.88936700  | -1.24739400 |
| C | 2.94953500  | 2.27421600  | 1.11655900  |
| C | 3.86942200  | 3.12198700  | -1.37623200 |
| H | 3.08049200  | 1.26615500  | -2.12567600 |
| C | 3.57595900  | 3.51741100  | 0.98583700  |
| H | 2.59973000  | 1.96705100  | 2.09711400  |
| C | 4.04102900  | 3.94289900  | -0.25809300 |
| H | 4.22221700  | 3.44750700  | -2.35138700 |
| H | 3.69961600  | 4.15119500  | 1.86042000  |
| H | 4.52761400  | 4.90942200  | -0.35864200 |
| C | -3.36944800 | -1.38560500 | 0.11321500  |
| C | -3.22972100 | -2.63461100 | -0.51017700 |
| C | -4.56977700 | -1.09325200 | 0.77994400  |
| C | -4.25926600 | -3.57680200 | -0.45754500 |
| H | -2.30860900 | -2.85979900 | -1.04345600 |
| C | -5.60202700 | -2.03118700 | 0.82599400  |
| H | -4.70392200 | -0.12479700 | 1.25462200  |
| C | -5.44784100 | -3.27585800 | 0.20979900  |
| H | -4.13586100 | -4.54036200 | -0.94535500 |
| H | -6.52836800 | -1.78979300 | 1.34136800  |
| H | -6.25363500 | -4.00448600 | 0.24484000  |
| C | -2.77156600 | 1.43950500  | 0.00302700  |
| C | -3.22982200 | 1.89081700  | -1.24750100 |
| C | -2.95128900 | 2.27313400  | 1.11730700  |

|           |             |             |             |
|-----------|-------------|-------------|-------------|
| C         | -3.86694200 | 3.12355800  | -1.37612800 |
| H         | -3.07656600 | 1.26860200  | -2.12620500 |
| C         | -3.57754600 | 3.51642800  | 0.98689300  |
| H         | -2.60313600 | 1.96496600  | 2.09813000  |
| C         | -4.04053200 | 3.94325400  | -0.25737900 |
| H         | -4.21804100 | 3.45015200  | -2.35154400 |
| H         | -3.70274900 | 4.14926900  | 1.86194000  |
| H         | -4.52700200 | 4.90986700  | -0.35772000 |
| Pd        | -0.00004000 | -0.46396400 | -1.13930500 |
| <b>20</b> |             |             |             |
| P         | -2.74039300 | -0.76609000 | 0.83751500  |
| C         | -2.61652900 | -0.03335700 | 2.55789700  |
| H         | -1.77833400 | -0.56196300 | 3.02908300  |
| H         | -3.50633400 | -0.30431100 | 3.14013200  |
| C         | -2.37720000 | 1.49206700  | 2.62675600  |
| H         | -2.70940900 | 1.82979000  | 3.61760800  |
| H         | -3.01898000 | 2.01488600  | 1.90595400  |
| C         | -0.91280000 | 1.95684600  | 2.46284600  |
| H         | -0.25291000 | 1.27997200  | 3.02086400  |
| H         | -0.80516300 | 2.95466200  | 2.90660400  |
| P         | -0.29369400 | 2.01247100  | 0.69212700  |
| C         | 1.43745300  | 2.65301600  | 0.90565000  |
| C         | 2.20754000  | 2.81201100  | -0.26027700 |
| C         | 2.03505700  | 2.94759300  | 2.14095300  |
| C         | 3.52103800  | 3.27127100  | -0.19706200 |
| H         | 1.77095600  | 2.56495700  | -1.22535700 |
| C         | 3.35857400  | 3.39505700  | 2.20686400  |
| H         | 1.47608600  | 2.83583100  | 3.06445800  |
| C         | 4.10327800  | 3.56325200  | 1.04010700  |
| H         | 4.09492700  | 3.38867400  | -1.11247100 |
| H         | 3.80188300  | 3.61781900  | 3.17447800  |
| H         | 5.13048100  | 3.91493700  | 1.09186500  |
| C         | -1.16558200 | 3.52901100  | 0.06925400  |
| C         | -2.14244600 | 3.38936300  | -0.92789000 |
| C         | -0.89474500 | 4.81136000  | 0.57372100  |
| C         | -2.84052500 | 4.50284100  | -1.40301100 |
| H         | -2.34731000 | 2.40002800  | -1.33043000 |
| C         | -1.58847000 | 5.92368600  | 0.09721000  |
| H         | -0.12800600 | 4.94515500  | 1.33267600  |
| C         | -2.56495800 | 5.77130200  | -0.89131300 |
| H         | -3.59468900 | 4.37680200  | -2.17551300 |
| H         | -1.36464800 | 6.91064300  | 0.49442200  |
| H         | -3.10345800 | 6.63924700  | -1.26305800 |
| C         | -2.87570800 | -2.56256400 | 1.27091100  |
| C         | -1.69332900 | -3.32179400 | 1.27537200  |
| C         | -4.08464800 | -3.18730700 | 1.61460200  |

|    |             |             |             |
|----|-------------|-------------|-------------|
| C  | -1.72018500 | -4.67250300 | 1.62787500  |
| H  | -0.74799900 | -2.86025400 | 0.99974800  |
| C  | -4.11035700 | -4.54140300 | 1.95393500  |
| H  | -5.01088800 | -2.61944000 | 1.60948900  |
| C  | -2.92881000 | -5.28615100 | 1.96375700  |
| H  | -0.79528200 | -5.24300900 | 1.62682300  |
| H  | -5.05528000 | -5.01433300 | 2.21030100  |
| H  | -2.95166500 | -6.34070800 | 2.22654900  |
| C  | -4.45537000 | -0.33040000 | 0.28875500  |
| C  | -4.76970300 | -0.54910000 | -1.06430300 |
| C  | -5.44289800 | 0.22425400  | 1.11779500  |
| C  | -6.03361000 | -0.24439300 | -1.56740800 |
| H  | -4.00841400 | -0.95643900 | -1.72547600 |
| C  | -6.70577100 | 0.54489900  | 0.61142700  |
| H  | -5.23880200 | 0.41307900  | 2.16705700  |
| C  | -7.00635000 | 0.30841700  | -0.73005700 |
| H  | -6.25594200 | -0.42838500 | -2.61536200 |
| H  | -7.45426900 | 0.97849900  | 1.26989600  |
| H  | -7.98871000 | 0.55763900  | -1.12244400 |
| Pd | -0.94622300 | 0.07461300  | -0.39187200 |
| S  | 3.04012700  | -2.16231300 | 0.49688900  |
| O  | 1.86691400  | -2.62177400 | 1.25249200  |
| O  | 3.87170500  | -3.08150700 | -0.27575200 |
| N  | 2.50911300  | -0.92126200 | -0.50311500 |
| H  | 1.54504000  | -0.64704300 | -0.28546500 |
| C  | 4.10917800  | -1.32577200 | 1.70962600  |
| C  | 3.82675100  | -1.46640200 | 3.06683500  |
| C  | 4.69875100  | -0.84785100 | 3.96480500  |
| H  | 2.96268900  | -2.03446700 | 3.38975800  |
| C  | 5.96334500  | -0.06284100 | 2.08167100  |
| C  | 5.78546900  | -0.13158200 | 3.46598000  |
| H  | 4.52899400  | -0.92571800 | 5.03499000  |
| H  | 6.79881100  | 0.48689600  | 1.65398700  |
| H  | 6.48562100  | 0.36506300  | 4.13051600  |
| C  | 2.94603400  | -0.74768100 | -1.84119300 |
| C  | 4.29579300  | -0.46565700 | -2.10090600 |
| C  | 2.05819800  | -0.81098900 | -2.92814800 |
| C  | 4.74049300  | -0.25888400 | -3.40322400 |
| H  | 4.97502400  | -0.41241200 | -1.25612500 |
| C  | 2.49307400  | -0.56652400 | -4.22989400 |
| C  | 3.84111000  | -0.29644900 | -4.47022200 |
| H  | 5.79193600  | -0.05257300 | -3.58248000 |
| H  | 1.78826800  | -0.60491500 | -5.05421900 |
| H  | 4.18101400  | -0.12160500 | -5.48715900 |
| N  | 5.14124100  | -0.65549100 | 1.21060800  |
| I  | -0.02316900 | -1.33083500 | -2.61462300 |

**21-ts**

|   |             |             |             |
|---|-------------|-------------|-------------|
| P | 2.29339200  | -1.14278100 | -0.95428800 |
| C | 2.27367700  | -0.52219900 | -2.71853100 |
| H | 1.34753300  | -0.92054500 | -3.15219400 |
| H | 3.09304300  | -0.98775400 | -3.28060400 |
| C | 2.31324500  | 1.01151100  | -2.89581200 |
| H | 2.62951400  | 1.20858700  | -3.92897600 |
| H | 3.09045300  | 1.45482400  | -2.26057800 |
| C | 0.97513400  | 1.75372200  | -2.68916000 |
| H | 0.16437100  | 1.16699400  | -3.13994400 |
| H | 1.01601200  | 2.71220800  | -3.22171000 |
| P | 0.49780000  | 2.09025800  | -0.90471000 |
| C | -1.02813000 | 3.12112600  | -1.11418400 |
| C | -1.57280400 | 3.70967700  | 0.04075700  |
| C | -1.69559700 | 3.30844100  | -2.33497800 |
| C | -2.73085500 | 4.48064600  | -0.02691900 |
| H | -1.08992600 | 3.55334900  | 1.00167700  |
| C | -2.86387300 | 4.07373500  | -2.40049800 |
| H | -1.31156800 | 2.86642800  | -3.24842600 |
| C | -3.38211300 | 4.66631500  | -1.24965600 |
| H | -3.13197000 | 4.92689500  | 0.87914100  |
| H | -3.36342100 | 4.20867500  | -3.35677100 |
| H | -4.28872000 | 5.26350800  | -1.30207900 |
| C | 1.74980200  | 3.38136000  | -0.45036900 |
| C | 2.72527400  | 3.07343200  | 0.50992000  |
| C | 1.76922100  | 4.65194400  | -1.04889600 |
| C | 3.70415100  | 4.00818800  | 0.85774000  |
| H | 2.70847800  | 2.09516100  | 0.98536800  |
| C | 2.74350600  | 5.58666400  | -0.69911100 |
| H | 1.01099400  | 4.91788000  | -1.78096200 |
| C | 3.71474000  | 5.26590200  | 0.25382000  |
| H | 4.45288900  | 3.75237100  | 1.60284600  |
| H | 2.74337600  | 6.56766600  | -1.16762000 |
| H | 4.47214900  | 5.99633800  | 0.52624600  |
| C | 2.12221800  | -2.96439800 | -1.24506400 |
| C | 0.86533500  | -3.55270700 | -1.03497600 |
| C | 3.18195100  | -3.77310000 | -1.68807000 |
| C | 0.66537400  | -4.91382600 | -1.27690600 |
| H | 0.03607400  | -2.95388300 | -0.67082200 |
| C | 2.98356600  | -5.13415100 | -1.92253100 |
| H | 4.16728100  | -3.34155700 | -1.84260800 |
| C | 1.72470000  | -5.70699900 | -1.71980500 |
| H | -0.31679700 | -5.34495500 | -1.10432800 |
| H | 3.81351900  | -5.74890900 | -2.26222200 |
| H | 1.57457200  | -6.76841500 | -1.89996000 |
| C | 4.06534500  | -0.97879700 | -0.44520000 |



|           |             |             |             |
|-----------|-------------|-------------|-------------|
| C         | 4.37121500  | -1.25818100 | 0.89966000  |
| C         | 5.10716600  | -0.57107700 | -1.29269400 |
| C         | 5.67759600  | -1.15500900 | 1.37448600  |
| H         | 3.57463300  | -1.55421600 | 1.57770000  |
| C         | 6.41542800  | -0.45504500 | -0.81354400 |
| H         | 4.91196500  | -0.33965700 | -2.33505300 |
| C         | 6.70558600  | -0.75006900 | 0.51832800  |
| H         | 5.89194800  | -1.38319900 | 2.41533300  |
| H         | 7.20715000  | -0.13544500 | -1.48648400 |
| H         | 7.72337100  | -0.66147700 | 0.88882700  |
| Pd        | 0.74167600  | 0.12165600  | 0.32881100  |
| S         | -3.42848400 | -2.08984400 | 0.36538600  |
| O         | -2.63656700 | -3.15112700 | -0.27339300 |
| O         | -4.12190500 | -2.29007500 | 1.63472800  |
| N         | -2.41026600 | -0.75600900 | 0.47274300  |
| H         | -1.49754700 | -0.94488400 | 0.04998700  |
| C         | -4.66891000 | -1.59144900 | -0.87143000 |
| C         | -4.81876400 | -2.36205400 | -2.02276200 |
| C         | -5.81061400 | -1.97210500 | -2.92473400 |
| H         | -4.18182700 | -3.22183100 | -2.19143300 |
| C         | -6.33918400 | -0.15755100 | -1.44522500 |
| C         | -6.58559900 | -0.85064900 | -2.63340000 |
| H         | -5.97253200 | -2.53671300 | -3.83860500 |
| H         | -6.92041100 | 0.72381300  | -1.18319100 |
| H         | -7.36608200 | -0.51415400 | -3.30873500 |
| C         | -2.37573400 | 0.15364000  | 1.56430800  |
| C         | -3.46861500 | 0.98790900  | 1.82438800  |
| C         | -1.20768800 | 0.30152900  | 2.33324300  |
| C         | -3.40246500 | 1.95397000  | 2.82602100  |
| H         | -4.35824200 | 0.86415900  | 1.21484600  |
| C         | -1.12200300 | 1.30292400  | 3.30642100  |
| C         | -2.21795200 | 2.13199500  | 3.54624200  |
| H         | -4.26730200 | 2.57917400  | 3.02810000  |
| H         | -0.21874200 | 1.40638900  | 3.89812100  |
| H         | -2.14879300 | 2.89644000  | 4.31578200  |
| N         | -5.39634900 | -0.52169000 | -0.57055100 |
| I         | 0.16998900  | -1.45721000 | 2.65927300  |
| <b>22</b> |             |             |             |
| P         | 2.34688200  | -0.90494900 | -0.99815800 |
| C         | 2.22091100  | -0.38740300 | -2.78724500 |
| H         | 1.33476900  | -0.90768000 | -3.17275800 |
| H         | 3.07241100  | -0.80530500 | -3.33609800 |
| C         | 2.09411000  | 1.12333700  | -3.05384000 |
| H         | 2.30588500  | 1.29650700  | -4.11702900 |
| H         | 2.85786600  | 1.68358000  | -2.50061500 |
| C         | 0.70030400  | 1.70510900  | -2.76568100 |

|   |             |             |             |
|---|-------------|-------------|-------------|
| H | -0.06370200 | 1.05949900  | -3.21360400 |
| H | 0.60081600  | 2.68930200  | -3.23758800 |
| P | 0.27274900  | 1.91813000  | -0.96035400 |
| C | -1.39721500 | 2.68793100  | -1.06253300 |
| C | -1.74860600 | 3.76091200  | -0.22887800 |
| C | -2.36260900 | 2.16842500  | -1.93945100 |
| C | -3.02770400 | 4.31372700  | -0.28867300 |
| H | -1.02755400 | 4.16167800  | 0.47483500  |
| C | -3.63957800 | 2.72623900  | -1.99974200 |
| H | -2.13554100 | 1.31519700  | -2.57125700 |
| C | -3.97444300 | 3.80272400  | -1.17744600 |
| H | -3.28369000 | 5.14128200  | 0.36698500  |
| H | -4.37374300 | 2.31165800  | -2.68509700 |
| H | -4.97030800 | 4.23508700  | -1.22253600 |
| C | 1.39621000  | 3.28920900  | -0.45670600 |
| C | 2.32224300  | 3.08321900  | 0.57645600  |
| C | 1.37570500  | 4.53132700  | -1.11478200 |
| C | 3.21093800  | 4.09663100  | 0.94467100  |
| H | 2.34501200  | 2.12743100  | 1.09304200  |
| C | 2.26279300  | 5.54125300  | -0.74551400 |
| H | 0.65524600  | 4.71907000  | -1.90628700 |
| C | 3.18274000  | 5.32503100  | 0.28484100  |
| H | 3.92177300  | 3.92128700  | 1.74718000  |
| H | 2.23456300  | 6.49812300  | -1.25978800 |
| H | 3.87244900  | 6.11415600  | 0.57182800  |
| C | 2.33607000  | -2.73520700 | -1.21068100 |
| C | 1.12703500  | -3.43244800 | -1.06618500 |
| C | 3.49205400  | -3.43559600 | -1.58706300 |
| C | 1.07393100  | -4.80546600 | -1.31147900 |
| H | 0.22970500  | -2.91905300 | -0.73618500 |
| C | 3.43659700  | -4.81006000 | -1.82200800 |
| H | 4.43906600  | -2.91251600 | -1.68601900 |
| C | 2.22731400  | -5.49595100 | -1.68780200 |
| H | 0.13174700  | -5.33116500 | -1.18657800 |
| H | 4.33973100  | -5.34459100 | -2.10480200 |
| H | 2.18712200  | -6.56721000 | -1.86668000 |
| C | 4.07780400  | -0.47735300 | -0.51750200 |
| C | 4.42623000  | -0.57456300 | 0.84172600  |
| C | 5.05431200  | -0.05495600 | -1.43413700 |
| C | 5.71938600  | -0.26821900 | 1.26544600  |
| H | 3.68213500  | -0.89696700 | 1.56465400  |
| C | 6.34601300  | 0.25960900  | -1.00450000 |
| H | 4.82360600  | 0.03309000  | -2.49072400 |
| C | 6.68241600  | 0.15196800  | 0.34510400  |
| H | 5.97097100  | -0.35688700 | 2.31885600  |
| H | 7.08766700  | 0.58645000  | -1.72866400 |

|           |             |             |             |
|-----------|-------------|-------------|-------------|
| H         | 7.68827500  | 0.39440600  | 0.67756100  |
| Pd        | 0.60591000  | 0.06492400  | 0.40647700  |
| S         | -3.39592500 | -2.00267200 | 0.37219900  |
| O         | -2.69202300 | -2.96171900 | -0.49564600 |
| O         | -3.77153600 | -2.32980400 | 1.74390900  |
| N         | -2.47077300 | -0.58850400 | 0.27677600  |
| H         | -1.58484000 | -0.85613700 | -0.15667800 |
| C         | -4.91963500 | -1.55618300 | -0.52112300 |
| C         | -5.24504600 | -2.24969600 | -1.68578100 |
| C         | -6.44276700 | -1.90884100 | -2.31630800 |
| H         | -4.58310200 | -3.01881600 | -2.06522700 |
| C         | -6.80458600 | -0.28433500 | -0.58676800 |
| C         | -7.23794900 | -0.90717400 | -1.76024900 |
| H         | -6.74876700 | -2.41967600 | -3.22510200 |
| H         | -7.39696100 | 0.50001500  | -0.12029600 |
| H         | -8.17708400 | -0.61350400 | -2.21907400 |
| C         | -2.25442500 | 0.32288100  | 1.36346600  |
| C         | -3.32196600 | 0.78852800  | 2.13738700  |
| C         | -0.94095900 | 0.77673800  | 1.58596800  |
| C         | -3.08216700 | 1.70067600  | 3.16445300  |
| H         | -4.32651400 | 0.43500600  | 1.93055900  |
| C         | -0.72975800 | 1.70090700  | 2.61366500  |
| C         | -1.78758200 | 2.15960200  | 3.40695200  |
| H         | -3.91197600 | 2.04958200  | 3.77361300  |
| H         | 0.27818400  | 2.04932500  | 2.82456300  |
| H         | -1.59390500 | 2.86281300  | 4.21353600  |
| N         | -5.66327400 | -0.60462000 | 0.03097700  |
| I         | 0.95934400  | -1.78278500 | 2.36693000  |
| <b>23</b> |             |             |             |
| P         | 0.28700800  | 2.22007200  | 0.42008600  |
| C         | 1.64196700  | 3.30818600  | 1.09948000  |
| H         | 1.57002100  | 3.23587000  | 2.19095100  |
| H         | 1.38552000  | 4.34314800  | 0.84793600  |
| C         | 3.08437700  | 3.00416100  | 0.65970100  |
| H         | 3.70275400  | 3.85128000  | 0.98324200  |
| H         | 3.15636300  | 2.97995000  | -0.43391400 |
| C         | 3.70204400  | 1.72764300  | 1.26085100  |
| H         | 3.48664600  | 1.68559800  | 2.33545000  |
| H         | 4.79141900  | 1.76235400  | 1.14687500  |
| P         | 3.07255400  | 0.15180800  | 0.49219500  |
| C         | 4.08275900  | -1.16951400 | 1.28048700  |
| C         | 4.04395100  | -2.45374600 | 0.70802100  |
| C         | 4.84855000  | -0.95923700 | 2.43717100  |
| C         | 4.76434500  | -3.49967000 | 1.28271500  |
| H         | 3.43477600  | -2.63939800 | -0.17337500 |
| C         | 5.56736300  | -2.01262400 | 3.00833100  |

|    |             |             |             |
|----|-------------|-------------|-------------|
| H  | 4.89647700  | 0.02018000  | 2.90256000  |
| C  | 5.52806900  | -3.28257700 | 2.43246500  |
| H  | 4.72162400  | -4.48714600 | 0.83208000  |
| H  | 6.15858200  | -1.83565100 | 3.90290500  |
| H  | 6.08691100  | -4.10057100 | 2.87885900  |
| C  | 3.76132400  | 0.24943700  | -1.21236900 |
| C  | 2.92544200  | 0.15691000  | -2.33112100 |
| C  | 5.14488700  | 0.42376300  | -1.39771100 |
| C  | 3.46247400  | 0.25729700  | -3.61795700 |
| H  | 1.86600300  | -0.02849500 | -2.20198600 |
| C  | 5.67554900  | 0.52354600  | -2.68164800 |
| H  | 5.81311900  | 0.46336400  | -0.54111400 |
| C  | 4.83224500  | 0.44441600  | -3.79487500 |
| H  | 2.80264200  | 0.17901100  | -4.47696400 |
| H  | 6.74610900  | 0.65489700  | -2.81474100 |
| H  | 5.24792900  | 0.51826500  | -4.79634300 |
| C  | -1.20773700 | 3.06113800  | 1.09086600  |
| C  | -2.29292700 | 3.37294300  | 0.26071600  |
| C  | -1.27792300 | 3.38471200  | 2.45642700  |
| C  | -3.42017200 | 4.00858500  | 0.78435100  |
| H  | -2.27484200 | 3.11060700  | -0.79048800 |
| C  | -2.39940100 | 4.03123900  | 2.97179900  |
| H  | -0.46821800 | 3.11907200  | 3.12921800  |
| C  | -3.47330500 | 4.34641000  | 2.13558900  |
| H  | -4.25884600 | 4.22441800  | 0.12952600  |
| H  | -2.43821500 | 4.27802200  | 4.02933100  |
| H  | -4.35098800 | 4.84284900  | 2.54065800  |
| C  | 0.24035400  | 2.56816800  | -1.38306700 |
| C  | -0.33002700 | 1.61338700  | -2.23827900 |
| C  | 0.68756200  | 3.78758400  | -1.92080400 |
| C  | -0.46321000 | 1.87611100  | -3.60316100 |
| H  | -0.68427700 | 0.66691100  | -1.84804000 |
| C  | 0.57323200  | 4.03703700  | -3.28807200 |
| H  | 1.11806000  | 4.55295500  | -1.28268500 |
| C  | -0.00539500 | 3.08365200  | -4.13059100 |
| H  | -0.93305900 | 1.13127400  | -4.23769900 |
| H  | 0.92889600  | 4.98059000  | -3.69327700 |
| H  | -0.10313700 | 3.28714100  | -5.19363900 |
| Pd | 0.68698400  | -0.03792300 | 1.01396000  |
| S  | -3.68868800 | -0.18183200 | -1.16499100 |
| O  | -4.47103900 | 0.97881300  | -0.72321900 |
| O  | -3.12664100 | -0.23495400 | -2.51541900 |
| N  | -2.39042000 | -0.38520300 | -0.13629300 |
| H  | -1.70521000 | -1.05668800 | -0.51305000 |
| C  | -4.75892900 | -1.64026000 | -0.95992200 |
| C  | -6.14275700 | -1.47515000 | -0.91989000 |

|              |             |             |             |
|--------------|-------------|-------------|-------------|
| C            | -6.91404100 | -2.63474700 | -0.82311300 |
| H            | -6.58063100 | -0.48437700 | -0.95664600 |
| C            | -4.87414600 | -3.90504000 | -0.80948400 |
| C            | -6.27117900 | -3.87137400 | -0.76775500 |
| H            | -7.99814200 | -2.57110000 | -0.78941400 |
| H            | -4.33301600 | -4.84707100 | -0.76299000 |
| H            | -6.83630800 | -4.79510900 | -0.69021400 |
| C            | -2.40970100 | -0.24536100 | 1.28334100  |
| C            | -3.60567700 | -0.22781700 | 2.01738800  |
| C            | -1.17810600 | -0.10501700 | 1.95416100  |
| C            | -3.58786800 | -0.08840200 | 3.40361100  |
| H            | -4.55714700 | -0.31243200 | 1.50671900  |
| C            | -1.18379500 | -0.00730200 | 3.35137100  |
| C            | -2.37550900 | 0.01160800  | 4.08157400  |
| H            | -4.52773200 | -0.07562900 | 3.94907200  |
| H            | -0.23980100 | 0.07019100  | 3.88590800  |
| H            | -2.35021500 | 0.10083600  | 5.16466000  |
| N            | -4.12372900 | -2.80318500 | -0.90687700 |
| I            | 0.36456900  | -2.60093100 | -1.30067200 |
| C            | 0.84783500  | -1.85113200 | 1.79347900  |
| O            | 0.91918000  | -2.82826000 | 2.38207000  |
| <b>24-ts</b> |             |             |             |
| P            | 1.14415400  | 2.06843200  | 0.79684400  |
| C            | 2.31851200  | 2.11830200  | 2.24197400  |
| H            | 1.74185500  | 1.79134500  | 3.11619600  |
| H            | 2.61259400  | 3.15613200  | 2.43315200  |
| C            | 3.58713300  | 1.25039400  | 2.10646700  |
| H            | 4.28924800  | 1.58749100  | 2.87964200  |
| H            | 4.08408000  | 1.44454700  | 1.14800100  |
| C            | 3.39237300  | -0.26692900 | 2.30363300  |
| H            | 2.77260500  | -0.44836000 | 3.19043800  |
| H            | 4.37018200  | -0.72788100 | 2.48694600  |
| P            | 2.58960800  | -1.12641700 | 0.85576400  |
| C            | 2.55748100  | -2.90423000 | 1.32640500  |
| C            | 2.05244700  | -3.80944200 | 0.37573000  |
| C            | 2.98471600  | -3.38891800 | 2.57117200  |
| C            | 1.98982000  | -5.17098300 | 0.66544900  |
| H            | 1.69830800  | -3.44389300 | -0.58570800 |
| C            | 2.91260800  | -4.75486200 | 2.85894900  |
| H            | 3.37739700  | -2.71342900 | 3.32486600  |
| C            | 2.41886400  | -5.64732800 | 1.90757400  |
| H            | 1.59732800  | -5.85882900 | -0.07819300 |
| H            | 3.24699900  | -5.11779500 | 3.82734900  |
| H            | 2.36472500  | -6.70893500 | 2.13298700  |
| C            | 3.93877600  | -1.05973200 | -0.40127800 |
| C            | 3.75805300  | -0.38280900 | -1.61305200 |

|    |             |             |             |
|----|-------------|-------------|-------------|
| C  | 5.17492400  | -1.67590300 | -0.13572900 |
| C  | 4.80342900  | -0.30728400 | -2.53848700 |
| H  | 2.79542200  | 0.05398900  | -1.84997900 |
| C  | 6.21360100  | -1.59936500 | -1.06080800 |
| H  | 5.32318200  | -2.23123200 | 0.78702700  |
| C  | 6.02966700  | -0.91059300 | -2.26422200 |
| H  | 4.64738800  | 0.21847600  | -3.47611200 |
| H  | 7.16369000  | -2.08187600 | -0.84690100 |
| H  | 6.83955000  | -0.85463600 | -2.98682000 |
| C  | -0.16614800 | 3.28777900  | 1.24296200  |
| C  | -1.17410900 | 3.53520200  | 0.29611600  |
| C  | -0.20070900 | 3.97412800  | 2.46528800  |
| C  | -2.18714700 | 4.45409000  | 0.56316100  |
| H  | -1.17871300 | 3.00039800  | -0.64928200 |
| C  | -1.21892100 | 4.89349200  | 2.73092900  |
| H  | 0.55987800  | 3.80429700  | 3.22049900  |
| C  | -2.21143900 | 5.13666200  | 1.78181400  |
| H  | -2.96319800 | 4.62418400  | -0.17753100 |
| H  | -1.23176600 | 5.41862500  | 3.68247200  |
| H  | -3.00325600 | 5.85076800  | 1.99122000  |
| C  | 2.03952100  | 2.93604900  | -0.56449600 |
| C  | 1.71860300  | 2.61505300  | -1.89223400 |
| C  | 2.97265400  | 3.95667300  | -0.31650700 |
| C  | 2.32029300  | 3.30246100  | -2.94918900 |
| H  | 1.01144300  | 1.81775500  | -2.10768400 |
| C  | 3.57913900  | 4.63279800  | -1.37479500 |
| H  | 3.22814000  | 4.24000600  | 0.70022000  |
| C  | 3.25271100  | 4.30812000  | -2.69397500 |
| H  | 2.05774700  | 3.04203600  | -3.97081700 |
| H  | 4.30231300  | 5.41727700  | -1.16790400 |
| H  | 3.72329800  | 4.83932700  | -3.51704200 |
| Pd | 0.38167700  | -0.20730100 | 0.52841000  |
| S  | -4.28821000 | 0.40571400  | -1.43420900 |
| O  | -5.21664300 | 1.44694000  | -0.97667300 |
| O  | -3.88902400 | 0.33608200  | -2.83487700 |
| N  | -2.84846500 | 0.51252500  | -0.56211700 |
| H  | -2.07529000 | 0.08287500  | -1.08902000 |
| C  | -5.02246900 | -1.18532500 | -0.93923600 |
| C  | -6.40867700 | -1.28851500 | -0.83257700 |
| C  | -6.92555900 | -2.54710000 | -0.52273300 |
| H  | -7.03996500 | -0.41993100 | -0.97979400 |
| C  | -4.67194900 | -3.37791500 | -0.45026000 |
| C  | -6.04436100 | -3.61117500 | -0.32884500 |
| H  | -7.99832600 | -2.69139700 | -0.42982700 |
| H  | -3.94883800 | -4.17470800 | -0.29497700 |
| H  | -6.40852100 | -4.60393000 | -0.08298600 |

|           |             |             |             |
|-----------|-------------|-------------|-------------|
| C         | -2.75666600 | 0.47886400  | 0.84417600  |
| C         | -3.77622700 | 1.02415800  | 1.64814900  |
| C         | -1.60455000 | -0.04374000 | 1.47814900  |
| C         | -3.67603200 | 1.01078500  | 3.03531700  |
| H         | -4.63870100 | 1.47274000  | 1.17168600  |
| C         | -1.53140100 | -0.05104800 | 2.88200500  |
| C         | -2.55398000 | 0.47248300  | 3.66807100  |
| H         | -4.48590000 | 1.43260300  | 3.62475000  |
| H         | -0.66400500 | -0.49717100 | 3.36076900  |
| H         | -2.47893700 | 0.45366100  | 4.75163800  |
| N         | -4.16406300 | -2.17936400 | -0.75702700 |
| I         | -0.03139300 | -0.92329300 | -2.46883900 |
| C         | -0.74838600 | -1.71135700 | 0.81941400  |
| O         | -1.23336100 | -2.75996700 | 0.91001100  |
| <b>25</b> |             |             |             |
| P         | -3.45832500 | 0.45397400  | 0.36424300  |
| C         | -3.77356200 | 1.68891800  | 1.72775100  |
| H         | -3.81539200 | 1.09498200  | 2.64979600  |
| H         | -4.77647800 | 2.11270000  | 1.60205500  |
| C         | -2.72803700 | 2.80766300  | 1.87822300  |
| H         | -3.14938000 | 3.57320900  | 2.54260400  |
| H         | -2.55143000 | 3.30844100  | 0.91814800  |
| C         | -1.39540900 | 2.34765900  | 2.49647500  |
| H         | -1.60204800 | 1.67255500  | 3.33428800  |
| H         | -0.85678500 | 3.20907000  | 2.90701600  |
| P         | -0.22011900 | 1.48365800  | 1.32894900  |
| C         | 1.22031200  | 1.13321700  | 2.42533900  |
| C         | 2.52438200  | 1.17635400  | 1.90543300  |
| C         | 1.04008600  | 0.73316700  | 3.75944400  |
| C         | 3.61750000  | 0.84895400  | 2.70794600  |
| H         | 2.69068100  | 1.45675400  | 0.86970400  |
| C         | 2.13603900  | 0.40821300  | 4.55976100  |
| H         | 0.04516800  | 0.66469900  | 4.18841500  |
| C         | 3.42837000  | 0.46828300  | 4.03743900  |
| H         | 4.61847000  | 0.88755100  | 2.28816300  |
| H         | 1.97603000  | 0.10643400  | 5.59140800  |
| H         | 4.28140100  | 0.21270100  | 4.66002800  |
| C         | 0.34878900  | 2.87579300  | 0.26540400  |
| C         | 0.13632800  | 2.82715700  | -1.11970400 |
| C         | 0.96391200  | 4.00992300  | 0.82532700  |
| C         | 0.52495200  | 3.89852600  | -1.92914200 |
| H         | -0.30534600 | 1.94320200  | -1.56695600 |
| C         | 1.34939900  | 5.07608700  | 0.01498600  |
| H         | 1.15540100  | 4.05670700  | 1.89437600  |
| C         | 1.12775200  | 5.02202100  | -1.36500100 |
| H         | 0.36229400  | 3.84480600  | -3.00171500 |

|    |             |             |             |
|----|-------------|-------------|-------------|
| H  | 1.82288500  | 5.94808700  | 0.45857000  |
| H  | 1.43088900  | 5.85287400  | -1.99652300 |
| C  | -4.83714100 | -0.72247000 | 0.69772800  |
| C  | -4.57839600 | -1.85880200 | 1.47840400  |
| C  | -6.14562100 | -0.47841600 | 0.25547400  |
| C  | -5.61571700 | -2.72480900 | 1.82722700  |
| H  | -3.56111600 | -2.08199600 | 1.78544200  |
| C  | -7.17914000 | -1.35174700 | 0.59767500  |
| H  | -6.35836800 | 0.38801100  | -0.36425100 |
| C  | -6.91663000 | -2.47328500 | 1.38713300  |
| H  | -5.40192000 | -3.60623200 | 2.42550800  |
| H  | -8.18810800 | -1.15700200 | 0.24377100  |
| H  | -7.72161500 | -3.15456800 | 1.64961000  |
| C  | -3.93886900 | 1.34241300  | -1.18133900 |
| C  | -3.58671100 | 0.75507200  | -2.41038200 |
| C  | -4.61448400 | 2.57346800  | -1.19290900 |
| C  | -3.91344200 | 1.37987000  | -3.61397700 |
| H  | -3.05777200 | -0.19368100 | -2.42237000 |
| C  | -4.93214400 | 3.20055500  | -2.40019700 |
| H  | -4.90072500 | 3.05856300  | -0.26527800 |
| C  | -4.58395000 | 2.60514800  | -3.61296400 |
| H  | -3.63618200 | 0.90805700  | -4.55258400 |
| H  | -5.45294400 | 4.15448300  | -2.38886300 |
| H  | -4.83177100 | 3.09387200  | -4.55141400 |
| Pd | -1.13566000 | -0.32148000 | 0.15793600  |
| S  | 4.91286400  | -1.37212300 | -2.09557600 |
| O  | 5.69610200  | -2.58578900 | -1.84548000 |
| O  | 4.74488000  | -0.83665400 | -3.44263600 |
| N  | 3.36051600  | -1.56401200 | -1.51270000 |
| H  | 2.69315000  | -0.90477500 | -1.92943600 |
| C  | 5.67793300  | -0.06744500 | -1.07867100 |
| C  | 6.94021900  | -0.28671300 | -0.52932200 |
| C  | 7.52763600  | 0.77466600  | 0.16179400  |
| H  | 7.42924300  | -1.24601000 | -0.64963400 |
| C  | 5.56606000  | 2.07452100  | -0.31984500 |
| C  | 6.83244200  | 1.97914500  | 0.26575000  |
| H  | 8.51226700  | 0.66172000  | 0.60680700  |
| H  | 4.98902400  | 2.99454000  | -0.25471800 |
| H  | 7.25671300  | 2.83066000  | 0.78885100  |
| C  | 2.93686300  | -2.12165900 | -0.29385000 |
| C  | 3.72814200  | -3.03332000 | 0.42441800  |
| C  | 1.64091300  | -1.78837900 | 0.20035700  |
| C  | 3.25803000  | -3.59083300 | 1.60931200  |
| H  | 4.69559300  | -3.31984000 | 0.03287400  |
| C  | 1.19661600  | -2.38767400 | 1.38908400  |
| C  | 1.98884000  | -3.27559300 | 2.10285900  |



|           |             |             |             |
|-----------|-------------|-------------|-------------|
| H         | 3.88960500  | -4.29652500 | 2.14306800  |
| H         | 0.19615900  | -2.14054600 | 1.73188800  |
| H         | 1.62147700  | -3.72857000 | 3.01859500  |
| N         | 4.98993900  | 1.06626200  | -0.98362000 |
| I         | -1.84056800 | -2.67629900 | -1.06183200 |
| C         | 0.74639500  | -0.82150000 | -0.49380600 |
| O         | 1.07115400  | -0.24557700 | -1.52780900 |
| <b>26</b> |             |             |             |
| P         | -2.09996900 | -0.07518000 | 1.84240000  |
| C         | -3.02712600 | -1.66871800 | 2.05698400  |
| H         | -3.77975000 | -1.67406100 | 1.25983500  |
| H         | -3.56215400 | -1.63653600 | 3.01261600  |
| C         | -2.18448000 | -2.95185100 | 1.95482200  |
| H         | -2.82941700 | -3.78030200 | 2.27401100  |
| H         | -1.34464600 | -2.93412800 | 2.66088600  |
| C         | -1.70124000 | -3.29439200 | 0.53444000  |
| H         | -2.51209300 | -3.12659400 | -0.18435800 |
| H         | -1.41477000 | -4.35148800 | 0.48575700  |
| P         | -0.22179800 | -2.34293800 | -0.07674300 |
| C         | 0.18834300  | -3.20240500 | -1.64898200 |
| C         | 1.50049300  | -3.59423500 | -1.95878200 |
| C         | -0.83592700 | -3.41082900 | -2.58948500 |
| C         | 1.77950000  | -4.21158300 | -3.17888300 |
| H         | 2.30522600  | -3.42346700 | -1.25067100 |
| C         | -0.54717800 | -4.03038600 | -3.80578100 |
| H         | -1.85054300 | -3.06780700 | -2.39682500 |
| C         | 0.75617500  | -4.43551100 | -4.10189800 |
| H         | 2.79817900  | -4.51431400 | -3.40634000 |
| H         | -1.34797100 | -4.18617100 | -4.52301600 |
| H         | 0.97498800  | -4.91767900 | -5.05108100 |
| C         | 1.07201200  | -2.86835300 | 1.12578600  |
| C         | 1.67568900  | -1.95089500 | 1.99158400  |
| C         | 1.38382700  | -4.23579800 | 1.26013200  |
| C         | 2.56244200  | -2.38425500 | 2.98197800  |
| H         | 1.45240900  | -0.89430600 | 1.91216500  |
| C         | 2.27490500  | -4.66530600 | 2.24029900  |
| H         | 0.93390300  | -4.96599700 | 0.59384200  |
| C         | 2.86200300  | -3.73890900 | 3.10912000  |
| H         | 3.01002300  | -1.65211800 | 3.64641500  |
| H         | 2.50594500  | -5.72325400 | 2.33125500  |
| H         | 3.54618800  | -4.07815000 | 3.88277300  |
| C         | -3.43015700 | 1.18368600  | 2.10275700  |
| C         | -4.64171000 | 1.06915300  | 1.39581100  |
| C         | -3.24455600 | 2.27650900  | 2.96539800  |
| C         | -5.64654100 | 2.02315200  | 1.56788500  |
| H         | -4.80012500 | 0.25660200  | 0.68951900  |

|    |             |             |             |
|----|-------------|-------------|-------------|
| C  | -4.25357600 | 3.22752500  | 3.12781000  |
| H  | -2.31920200 | 2.38532600  | 3.52125700  |
| C  | -5.45801700 | 3.10207800  | 2.43350800  |
| H  | -6.57591000 | 1.91715000  | 1.01512700  |
| H  | -4.09539200 | 4.06507100  | 3.80214600  |
| H  | -6.24269400 | 3.84267300  | 2.56341300  |
| C  | -1.06508700 | 0.09862900  | 3.35782300  |
| C  | -1.35684400 | -0.56223200 | 4.56226200  |
| C  | 0.04336800  | 0.95824800  | 3.31274700  |
| C  | -0.55312700 | -0.37193900 | 5.68721600  |
| H  | -2.21323100 | -1.22501800 | 4.63460700  |
| C  | 0.84389100  | 1.15393600  | 4.44014800  |
| H  | 0.29874400  | 1.47466300  | 2.39306900  |
| C  | 0.54757800  | 0.48651200  | 5.62967500  |
| H  | -0.79061300 | -0.89331200 | 6.61078700  |
| H  | 1.70031100  | 1.81791800  | 4.37221700  |
| H  | 1.16984000  | 0.63286700  | 6.50869400  |
| Pd | -0.81218600 | -0.04725400 | -0.33521700 |
| S  | 3.33177200  | 1.72013800  | 0.39882200  |
| O  | 3.70198900  | 2.84342900  | -0.46855000 |
| O  | 2.54348100  | 1.93728500  | 1.61575000  |
| N  | 2.46285200  | 0.56050600  | -0.45449400 |
| H  | 1.53000700  | 0.41773300  | -0.05554800 |
| C  | 4.89062700  | 0.90698100  | 0.86270000  |
| C  | 6.09389000  | 1.55493000  | 0.58781200  |
| C  | 7.26286700  | 0.91803500  | 1.01091200  |
| H  | 6.10298300  | 2.50424300  | 0.06551200  |
| C  | 5.89572300  | -0.85280400 | 1.88726800  |
| C  | 7.16470700  | -0.30760200 | 1.66810700  |
| H  | 8.23145900  | 1.37342300  | 0.82630300  |
| H  | 5.77383000  | -1.80729800 | 2.39415200  |
| H  | 8.05049000  | -0.83558600 | 2.00701900  |
| C  | 2.61114500  | 0.28103000  | -1.83177400 |
| C  | 3.89784400  | 0.26766000  | -2.39324400 |
| C  | 1.49616700  | -0.01955000 | -2.64795500 |
| C  | 4.08925000  | -0.02107700 | -3.73877500 |
| H  | 4.75728600  | 0.48239000  | -1.76989400 |
| C  | 1.72509800  | -0.32375700 | -4.00503200 |
| C  | 2.99797700  | -0.32465000 | -4.55543400 |
| H  | 5.09738500  | -0.01864400 | -4.14422000 |
| H  | 0.85787600  | -0.55667300 | -4.61192800 |
| H  | 3.13957500  | -0.56056400 | -5.60581500 |
| N  | 4.76845700  | -0.25126800 | 1.49579600  |
| I  | -4.40026900 | -1.49995100 | -1.68130000 |
| C  | 0.04219700  | -0.04859800 | -2.23566600 |
| O  | -0.80695300 | -0.08809500 | -3.09720100 |

|   |             |            |             |
|---|-------------|------------|-------------|
| C | -0.96285800 | 2.32293900 | -0.98529300 |
| C | 0.03529300  | 3.18526900 | -1.00329400 |
| H | 1.01713900  | 2.88617300 | -0.65548900 |
| C | -2.15473100 | 1.72203400 | -1.08077300 |
| H | -2.91069100 | 1.86470500 | -0.31263500 |
| H | -2.47556900 | 1.19993700 | -1.98310200 |
| C | -0.06013100 | 4.57880600 | -1.48593000 |
| C | 1.10152700  | 5.36930700 | -1.47138000 |
| C | -1.25840600 | 5.14202600 | -1.95716700 |
| C | 1.06380500  | 6.69134900 | -1.91404200 |
| H | 2.03373500  | 4.93748900 | -1.11633500 |
| C | -1.29150600 | 6.46177200 | -2.39810900 |
| H | -2.16337200 | 4.54120300 | -1.97897000 |
| C | -0.13147200 | 7.24295900 | -2.37775600 |
| H | 1.97102600  | 7.28959600 | -1.89710100 |
| H | -2.22544800 | 6.88314600 | -2.76040800 |
| H | -0.16136500 | 8.27286500 | -2.72314600 |

**27-ts**

|   |             |             |             |
|---|-------------|-------------|-------------|
| P | -2.14240000 | -0.43143800 | 1.80300100  |
| C | -3.04410800 | -2.04653600 | 1.68727900  |
| H | -3.78656100 | -1.90277200 | 0.89152000  |
| H | -3.59537800 | -2.20101700 | 2.62211800  |
| C | -2.18540100 | -3.28078000 | 1.35827300  |
| H | -2.83859400 | -4.15486900 | 1.47348600  |
| H | -1.37810500 | -3.40880700 | 2.09071500  |
| C | -1.63420700 | -3.32624600 | -0.07867700 |
| H | -2.41637200 | -3.01899700 | -0.78378200 |
| H | -1.33970100 | -4.35203000 | -0.32806400 |
| P | -0.14448500 | -2.25566800 | -0.40557100 |
| C | 0.31786900  | -2.73865300 | -2.11913700 |
| C | 1.63719100  | -3.06993300 | -2.46663100 |
| C | -0.67461400 | -2.71819900 | -3.11490200 |
| C | 1.95414500  | -3.40350700 | -3.78433800 |
| H | 2.41713700  | -3.07530200 | -1.71158200 |
| C | -0.34836600 | -3.05577500 | -4.42892300 |
| H | -1.69505700 | -2.41910800 | -2.88281500 |
| C | 0.96154000  | -3.40289900 | -4.76621900 |
| H | 2.97789900  | -3.66349300 | -4.04073600 |
| H | -1.12592900 | -3.03908800 | -5.18732500 |
| H | 1.20944800  | -3.66618800 | -5.79125600 |
| C | 1.11959800  | -3.04406000 | 0.68200300  |
| C | 1.74016900  | -2.32361200 | 1.70851100  |
| C | 1.40740500  | -4.41642500 | 0.54808200  |
| C | 2.61678700  | -2.95755500 | 2.59455400  |
| H | 1.54090800  | -1.26660500 | 1.83477300  |
| C | 2.28829300  | -5.04514400 | 1.42487300  |

|    |             |             |             |
|----|-------------|-------------|-------------|
| H  | 0.94735600  | -4.99466600 | -0.24807300 |
| C  | 2.89076400  | -4.31671100 | 2.45628100  |
| H  | 3.07597100  | -2.37742000 | 3.38908700  |
| H  | 2.49995400  | -6.10465000 | 1.30795500  |
| H  | 3.56739400  | -4.81244100 | 3.14779300  |
| C  | -3.48269900 | 0.74946200  | 2.25986700  |
| C  | -4.60378700 | 0.86131200  | 1.41752800  |
| C  | -3.40153100 | 1.55620900  | 3.40637700  |
| C  | -5.62906200 | 1.75301100  | 1.73461700  |
| H  | -4.67768800 | 0.26787600  | 0.50711200  |
| C  | -4.43028600 | 2.45001100  | 3.71157600  |
| H  | -2.54369300 | 1.48632600  | 4.06714200  |
| C  | -5.54699900 | 2.54813000  | 2.87992300  |
| H  | -6.49066300 | 1.82306900  | 1.07638800  |
| H  | -4.35667800 | 3.06591100  | 4.60407100  |
| H  | -6.34742600 | 3.24243200  | 3.12177100  |
| C  | -1.09648800 | -0.52263500 | 3.31395400  |
| C  | -1.36897800 | -1.40588100 | 4.37105000  |
| C  | -0.00219100 | 0.34968500  | 3.42579800  |
| C  | -0.55954500 | -1.41911700 | 5.50807400  |
| H  | -2.21331600 | -2.08568600 | 4.31667200  |
| C  | 0.80310500  | 0.34043900  | 4.56610200  |
| H  | 0.23778700  | 1.03328300  | 2.61726700  |
| C  | 0.52660300  | -0.54634100 | 5.60842500  |
| H  | -0.78038100 | -2.11127700 | 6.31624600  |
| H  | 1.64977600  | 1.01795500  | 4.62161600  |
| H  | 1.15415100  | -0.55921600 | 6.49570900  |
| Pd | -0.83770000 | 0.05415600  | -0.17992300 |
| S  | 3.33606400  | 1.65960900  | 0.69055800  |
| O  | 3.71259600  | 2.89689700  | -0.00343600 |
| O  | 2.55060600  | 1.68860900  | 1.92775900  |
| N  | 2.47162600  | 0.64048500  | -0.33782800 |
| H  | 1.55090700  | 0.42661600  | 0.05523500  |
| C  | 4.89232600  | 0.78033600  | 1.02569300  |
| C  | 6.10002300  | 1.44317700  | 0.81396500  |
| C  | 7.26658700  | 0.74420400  | 1.13348600  |
| H  | 6.11395400  | 2.45121200  | 0.41695700  |
| C  | 5.88826000  | -1.10676500 | 1.80241200  |
| C  | 7.16128000  | -0.55309900 | 1.63279400  |
| H  | 8.23852400  | 1.20784300  | 0.99190900  |
| H  | 5.76140700  | -2.11676900 | 2.18530500  |
| H  | 8.04456300  | -1.13014300 | 1.88797600  |
| C  | 2.56842300  | 0.66786700  | -1.75113300 |
| C  | 3.84165800  | 0.65985800  | -2.33891800 |
| C  | 1.42176000  | 0.66149400  | -2.57951600 |
| C  | 3.99365100  | 0.66852400  | -3.72065000 |

|           |             |             |             |
|-----------|-------------|-------------|-------------|
| H         | 4.71930000  | 0.63557300  | -1.70320000 |
| C         | 1.60629400  | 0.63693800  | -3.97503700 |
| C         | 2.86992600  | 0.65178700  | -4.54907400 |
| H         | 4.99303600  | 0.67062600  | -4.14698800 |
| H         | 0.71617800  | 0.61071300  | -4.59327300 |
| H         | 2.97803200  | 0.64433700  | -5.62944600 |
| N         | 4.76351000  | -0.44759000 | 1.50942400  |
| I         | -4.43834100 | -1.24507300 | -1.96472200 |
| C         | -0.02152400 | 0.65383400  | -2.14408400 |
| O         | -0.91604400 | 0.51620800  | -2.94770800 |
| C         | -0.60339700 | 2.18006500  | -0.87478200 |
| C         | 0.31918900  | 3.15307600  | -0.92489100 |
| H         | 1.37218500  | 2.90345600  | -0.96447700 |
| C         | -1.91119200 | 1.91396900  | -0.51495600 |
| H         | -2.31297600 | 2.36287000  | 0.39030300  |
| H         | -2.63414300 | 1.51710500  | -1.23129800 |
| C         | 0.02937900  | 4.58961100  | -0.99322600 |
| C         | 1.10862200  | 5.48564200  | -0.85873100 |
| C         | -1.26411500 | 5.11328200  | -1.18025900 |
| C         | 0.89586300  | 6.86179700  | -0.88713000 |
| H         | 2.10976500  | 5.08797700  | -0.71411400 |
| C         | -1.47044300 | 6.48926900  | -1.21296900 |
| H         | -2.10350500 | 4.43909300  | -1.32053800 |
| C         | -0.39360600 | 7.36905900  | -1.06391900 |
| H         | 1.73790500  | 7.53932700  | -0.77372600 |
| H         | -2.47390500 | 6.87782600  | -1.36386200 |
| H         | -0.55917900 | 8.44261600  | -1.09269000 |
| <b>28</b> |             |             |             |
| P         | -2.24369000 | 2.26247600  | -0.07790800 |
| C         | -4.10500500 | 2.32696500  | -0.26768100 |
| H         | -4.29185700 | 2.38615200  | -1.34625100 |
| H         | -4.43839400 | 3.28127800  | 0.15510600  |
| C         | -4.91146300 | 1.15638300  | 0.32241600  |
| H         | -5.95330000 | 1.48768500  | 0.42638900  |
| H         | -4.56620000 | 0.91453700  | 1.33526600  |
| C         | -4.89532500 | -0.09458000 | -0.57123900 |
| H         | -5.02944600 | 0.20864400  | -1.61624500 |
| H         | -5.73754600 | -0.75386700 | -0.33447900 |
| P         | -3.32415800 | -1.11628300 | -0.53608700 |
| C         | -3.55601800 | -2.02479100 | -2.12723000 |
| C         | -4.53194100 | -3.02495000 | -2.25958400 |
| C         | -2.81255500 | -1.64548300 | -3.25372800 |
| C         | -4.75998500 | -3.63064400 | -3.49573700 |
| H         | -5.10733700 | -3.34111100 | -1.39428000 |
| C         | -3.04740700 | -2.24766500 | -4.49144900 |
| H         | -2.02873100 | -0.90177600 | -3.15241200 |

|    |             |             |             |
|----|-------------|-------------|-------------|
| C  | -4.01988500 | -3.24130100 | -4.61446400 |
| H  | -5.51370700 | -4.40880200 | -3.58325200 |
| H  | -2.45689100 | -1.95093500 | -5.35401900 |
| H  | -4.19567300 | -3.71638100 | -5.57599600 |
| C  | -3.68780100 | -2.39485700 | 0.74778700  |
| C  | -2.92362200 | -3.57426300 | 0.76895600  |
| C  | -4.69118500 | -2.22591400 | 1.71450900  |
| C  | -3.17538000 | -4.56315400 | 1.71884300  |
| H  | -2.12746100 | -3.71660200 | 0.04564300  |
| C  | -4.93749900 | -3.21675000 | 2.66797100  |
| H  | -5.29436200 | -1.32412000 | 1.73652200  |
| C  | -4.18425000 | -4.39064500 | 2.66923300  |
| H  | -2.57665100 | -5.46980200 | 1.71548400  |
| H  | -5.72247400 | -3.06870600 | 3.40516900  |
| H  | -4.37973900 | -5.16446700 | 3.40692200  |
| C  | -1.75842600 | 3.42979600  | -1.42383900 |
| C  | -1.26279600 | 2.91622200  | -2.63205300 |
| C  | -1.96109100 | 4.81369000  | -1.30266800 |
| C  | -0.98234800 | 3.76898100  | -3.70131300 |
| H  | -1.08139300 | 1.84818800  | -2.72296100 |
| C  | -1.67619600 | 5.66421800  | -2.37168500 |
| H  | -2.33063600 | 5.23008600  | -0.37011300 |
| C  | -1.18850800 | 5.14370600  | -3.57259900 |
| H  | -0.59295200 | 3.35856500  | -4.62894900 |
| H  | -1.83268900 | 6.73424600  | -2.26437900 |
| H  | -0.96429500 | 5.80850200  | -4.40243000 |
| C  | -1.94459000 | 3.21916200  | 1.47079400  |
| C  | -2.92820700 | 3.33580700  | 2.46764400  |
| C  | -0.67930200 | 3.78242200  | 1.70933900  |
| C  | -2.65276300 | 3.99788800  | 3.66591000  |
| H  | -3.91527900 | 2.90826200  | 2.32621100  |
| C  | -0.40391500 | 4.43679600  | 2.90893700  |
| H  | 0.10593200  | 3.71127300  | 0.96766100  |
| C  | -1.38980000 | 4.54711600  | 3.89118000  |
| H  | -3.42750200 | 4.07785300  | 4.42380400  |
| H  | 0.59228500  | 4.83633400  | 3.07169400  |
| H  | -1.17376800 | 5.05226500  | 4.82851600  |
| Pd | -1.24949900 | 0.16219800  | -0.28483700 |
| S  | 4.62881100  | -0.96217500 | 1.04718200  |
| O  | 5.05111600  | 0.18754300  | 1.85143100  |
| O  | 3.94761400  | -2.11096300 | 1.64475100  |
| N  | 3.64005400  | -0.40573600 | -0.16846300 |
| H  | 3.06159600  | -1.12930900 | -0.59661700 |
| C  | 6.13742400  | -1.59006500 | 0.24105000  |
| C  | 7.38162300  | -1.25617000 | 0.77333900  |
| C  | 8.50549500  | -1.81613900 | 0.16403800  |

|           |             |             |             |
|-----------|-------------|-------------|-------------|
| H         | 7.45052800  | -0.58386800 | 1.62037000  |
| C         | 7.02979800  | -2.91376600 | -1.37992000 |
| C         | 8.32882900  | -2.66253800 | -0.93022100 |
| H         | 9.50088100  | -1.59206400 | 0.53729700  |
| H         | 6.85167300  | -3.56199600 | -2.23535900 |
| H         | 9.17685200  | -3.11814500 | -1.43215000 |
| C         | 3.93737800  | 0.79263400  | -0.88990500 |
| C         | 4.68192600  | 0.72841200  | -2.07286700 |
| C         | 3.50779400  | 2.03846200  | -0.39178400 |
| C         | 5.01399500  | 1.89477200  | -2.76200700 |
| H         | 5.00518000  | -0.24393100 | -2.43171800 |
| C         | 3.89575000  | 3.20307700  | -1.06883600 |
| C         | 4.63313300  | 3.13692000  | -2.24918800 |
| H         | 5.58513300  | 1.83335100  | -3.68443900 |
| H         | 3.59196400  | 4.15953500  | -0.65504100 |
| H         | 4.90774600  | 4.05060400  | -2.76941100 |
| N         | 5.94262300  | -2.38717800 | -0.80513200 |
| I         | 0.22823800  | -2.07672800 | -1.01389800 |
| C         | 2.62164200  | 2.20741300  | 0.82193000  |
| O         | 2.78379400  | 3.18045900  | 1.54735300  |
| C         | 1.45835700  | 1.25575300  | 1.01925000  |
| C         | 1.38289100  | 0.66735600  | 2.22536000  |
| H         | 2.20922700  | 0.88529000  | 2.90312200  |
| C         | 0.60767900  | 1.17374400  | -0.22480000 |
| H         | 0.47070300  | 2.18943200  | -0.61467800 |
| H         | 1.16051300  | 0.64592100  | -1.00553300 |
| C         | 0.39077700  | -0.28773900 | 2.77859200  |
| C         | 0.80302200  | -1.58967500 | 3.11246900  |
| C         | -0.91414600 | 0.10839800  | 3.10865200  |
| C         | -0.07610500 | -2.47306900 | 3.73685900  |
| H         | 1.81247100  | -1.90621000 | 2.86696100  |
| C         | -1.78924000 | -0.77678300 | 3.74454300  |
| H         | -1.22581200 | 1.12748900  | 2.91118300  |
| C         | -1.37554800 | -2.07121700 | 4.05776500  |
| H         | 0.25839300  | -3.47888500 | 3.97869800  |
| H         | -2.79198300 | -0.44680200 | 4.00645600  |
| H         | -2.05811000 | -2.75985400 | 4.54780700  |
| <b>29</b> |             |             |             |
| P         | -1.24305900 | -0.97985500 | -1.74954100 |
| C         | 0.27199900  | -0.46753700 | -2.74038000 |
| H         | -0.03689300 | -0.35988200 | -3.78615300 |
| H         | 0.99241300  | -1.28805600 | -2.69732100 |
| C         | 0.98520700  | 0.80971900  | -2.27011300 |
| H         | 1.77443600  | 1.02078700  | -3.00317500 |
| H         | 1.50361200  | 0.59739900  | -1.33138000 |
| C         | 0.08781000  | 2.05706800  | -2.13939100 |

|   |             |             |             |
|---|-------------|-------------|-------------|
| H | -0.69523000 | 2.05175000  | -2.90667300 |
| H | 0.67700900  | 2.96669400  | -2.29830300 |
| P | -0.78443800 | 2.20143200  | -0.48941600 |
| C | -2.13889500 | 3.40252200  | -0.86234200 |
| C | -1.91337300 | 4.48156100  | -1.73673500 |
| C | -3.38866200 | 3.27723900  | -0.24294200 |
| C | -2.92402500 | 5.40627300  | -1.99265900 |
| H | -0.94671700 | 4.61139700  | -2.21474800 |
| C | -4.39763500 | 4.21135100  | -0.49819900 |
| H | -3.58365800 | 2.44376800  | 0.42714800  |
| C | -4.17026200 | 5.27284500  | -1.37271100 |
| H | -2.73768900 | 6.23346300  | -2.67286200 |
| H | -5.36190700 | 4.09684800  | -0.01034000 |
| H | -4.95670100 | 5.99618200  | -1.57261200 |
| C | 0.35288000  | 3.26074600  | 0.51554900  |
| C | -0.18219400 | 4.01475500  | 1.57484100  |
| C | 1.73834600  | 3.29792200  | 0.29730500  |
| C | 0.64533800  | 4.79253300  | 2.38388500  |
| H | -1.25271400 | 4.00342300  | 1.75972600  |
| C | 2.56444800  | 4.08122200  | 1.10784500  |
| H | 2.18629600  | 2.71303700  | -0.49963200 |
| C | 2.02262200  | 4.83060200  | 2.15186300  |
| H | 0.21123800  | 5.37384300  | 3.19300700  |
| H | 3.63498000  | 4.10239300  | 0.92111600  |
| H | 2.66675700  | 5.43962100  | 2.78033500  |
| C | -2.64305000 | -0.52583100 | -2.86563800 |
| C | -3.75213400 | 0.16052700  | -2.35405500 |
| C | -2.62318500 | -0.86941100 | -4.23057800 |
| C | -4.81257800 | 0.51384400  | -3.19516400 |
| H | -3.80291300 | 0.39289600  | -1.29435600 |
| C | -3.68124100 | -0.51584300 | -5.06515500 |
| H | -1.78824400 | -1.42956800 | -4.64331400 |
| C | -4.77767400 | 0.18257700  | -4.54843600 |
| H | -5.66467000 | 1.04552000  | -2.78118100 |
| H | -3.65316200 | -0.78849700 | -6.11702200 |
| H | -5.60243000 | 0.45829500  | -5.20060100 |
| C | -1.20173000 | -2.82320400 | -1.85963300 |
| C | -0.00690900 | -3.52528500 | -1.61881700 |
| C | -2.38087900 | -3.55078200 | -2.08921900 |
| C | 0.00580900  | -4.92118400 | -1.63075800 |
| H | 0.91300700  | -2.99168000 | -1.39919600 |
| C | -2.36211700 | -4.94695300 | -2.09591400 |
| H | -3.31564000 | -3.02934900 | -2.26841300 |
| C | -1.16929400 | -5.63661600 | -1.87073700 |
| H | 0.93889100  | -5.44715400 | -1.44713900 |
| H | -3.28369100 | -5.49323500 | -2.27883400 |



|    |             |             |             |
|----|-------------|-------------|-------------|
| H  | -1.15608600 | -6.72326200 | -1.87802800 |
| Pd | -1.14174200 | 0.00539600  | 0.44431300  |
| S  | 4.61485000  | -1.13667100 | -0.76062200 |
| O  | 4.75512700  | -2.21003500 | 0.22189600  |
| O  | 3.86891500  | -1.32250300 | -2.00546200 |
| N  | 4.08798900  | 0.32171100  | -0.01499000 |
| H  | 4.69745200  | 1.05158800  | -0.39364500 |
| C  | 6.30732200  | -0.65479300 | -1.25145300 |
| C  | 7.26045200  | -1.65603200 | -1.42986700 |
| C  | 8.52175900  | -1.26173200 | -1.87442100 |
| H  | 7.01911700  | -2.69113700 | -1.21600100 |
| C  | 7.73830800  | 1.00799700  | -1.88036500 |
| C  | 8.76591700  | 0.09290000  | -2.10872000 |
| H  | 9.30315000  | -1.99986800 | -2.03057200 |
| H  | 7.89071600  | 2.07308400  | -2.03783500 |
| H  | 9.73525600  | 0.43801300  | -2.45381700 |
| C  | 3.96231600  | 0.39909400  | 1.40355900  |
| C  | 4.95637900  | 1.06504100  | 2.13032500  |
| C  | 2.80608300  | -0.07291800 | 2.07265100  |
| C  | 4.84251800  | 1.24281100  | 3.50773800  |
| H  | 5.83219300  | 1.43486300  | 1.60308100  |
| C  | 2.72212400  | 0.10302900  | 3.46352400  |
| C  | 3.72784000  | 0.74489200  | 4.18195400  |
| H  | 5.63124900  | 1.75513800  | 4.05166700  |
| H  | 1.85361300  | -0.27908300 | 3.98837200  |
| H  | 3.63803200  | 0.85841800  | 5.25807700  |
| N  | 6.52031800  | 0.64192500  | -1.45710300 |
| C  | 1.71793000  | -0.78521100 | 1.33270800  |
| O  | 1.97894100  | -1.42390400 | 0.31836600  |
| C  | 0.31324500  | -0.77485600 | 1.89890700  |
| C  | -0.47519400 | -1.93212100 | 1.62416700  |
| H  | -0.03374000 | -2.60276700 | 0.89198100  |
| C  | -0.29878600 | 0.38879500  | 2.44088200  |
| C  | -1.46606800 | -2.58487100 | 2.49055500  |
| C  | -2.20569100 | -3.66109800 | 1.96196100  |
| C  | -1.63154800 | -2.27200200 | 3.85275800  |
| C  | -3.09965200 | -4.37350100 | 2.75425300  |
| H  | -2.08109200 | -3.92415500 | 0.91581800  |
| C  | -2.51897200 | -2.99299700 | 4.64690200  |
| H  | -1.04547000 | -1.47688400 | 4.30055900  |
| C  | -3.26235900 | -4.04183600 | 4.10154100  |
| H  | -3.66943800 | -5.19074100 | 2.32045400  |
| H  | -2.62816100 | -2.73620400 | 5.69719900  |
| H  | -3.95747200 | -4.59988200 | 4.72299100  |
| H  | -1.18971000 | 0.32145800  | 3.05367900  |
| H  | 0.28569100  | 1.29700700  | 2.54541000  |

|              |             |             |             |
|--------------|-------------|-------------|-------------|
| I            | -3.99856600 | -0.05117100 | 1.56447300  |
| <b>30-ts</b> |             |             |             |
| P            | 1.52712100  | -1.15088800 | 1.59709700  |
| C            | 0.15906400  | -0.39853900 | 2.63907700  |
| H            | 0.48760500  | -0.40122400 | 3.68452000  |
| H            | -0.71832100 | -1.04481600 | 2.56809800  |
| C            | -0.27269800 | 1.02261700  | 2.23505800  |
| H            | -1.04505700 | 1.33566800  | 2.94845500  |
| H            | -0.76544700 | 0.99184800  | 1.25713500  |
| C            | 0.86427000  | 2.06553800  | 2.23396800  |
| H            | 1.59002800  | 1.83549700  | 3.02251900  |
| H            | 0.47305800  | 3.06374800  | 2.45616000  |
| P            | 1.83198100  | 2.12799100  | 0.63249600  |
| C            | 3.44603600  | 2.86244500  | 1.16401300  |
| C            | 3.49848700  | 3.78927500  | 2.22044400  |
| C            | 4.62385800  | 2.55450100  | 0.47082900  |
| C            | 4.70710200  | 4.38366100  | 2.58065000  |
| H            | 2.59745000  | 4.06092200  | 2.76247800  |
| C            | 5.83218700  | 3.15755100  | 0.83163400  |
| H            | 4.60718900  | 1.82726500  | -0.33689800 |
| C            | 5.87824300  | 4.06932700  | 1.88562200  |
| H            | 4.73283800  | 5.09581400  | 3.40152800  |
| H            | 6.73602500  | 2.90283800  | 0.28452800  |
| H            | 6.81939600  | 4.53501000  | 2.16675100  |
| C            | 1.12611900  | 3.55663100  | -0.30848300 |
| C            | 1.86000700  | 4.04143200  | -1.40582800 |
| C            | -0.09723300 | 4.16438600  | 0.00110400  |
| C            | 1.38853100  | 5.11379300  | -2.16118000 |
| H            | 2.81056300  | 3.58338600  | -1.66619600 |
| C            | -0.56480500 | 5.24460000  | -0.75327900 |
| H            | -0.69874500 | 3.80108500  | 0.82784100  |
| C            | 0.17406900  | 5.72295300  | -1.83472100 |
| H            | 1.97436700  | 5.47676800  | -3.00141100 |
| H            | -1.50814700 | 5.71537900  | -0.48832300 |
| H            | -0.19070100 | 6.56415100  | -2.41807300 |
| C            | 3.00392300  | -1.06418500 | 2.70479300  |
| C            | 4.23587200  | -0.61865500 | 2.20984500  |
| C            | 2.91527600  | -1.47053400 | 4.04963200  |
| C            | 5.35318400  | -0.55814400 | 3.04937600  |
| H            | 4.33169900  | -0.34652000 | 1.16337600  |
| C            | 4.03015700  | -1.40929600 | 4.88265200  |
| H            | 1.97854000  | -1.85279500 | 4.44651800  |
| C            | 5.25242500  | -0.94632000 | 4.38386900  |
| H            | 6.29970900  | -0.20648500 | 2.64884200  |
| H            | 3.94738000  | -1.72645100 | 5.91905400  |
| H            | 6.12150100  | -0.89756200 | 5.03496800  |

|    |             |             |             |
|----|-------------|-------------|-------------|
| C  | 1.15433400  | -2.95956900 | 1.58102700  |
| C  | -0.15680700 | -3.43109700 | 1.39598000  |
| C  | 2.20627600  | -3.88877300 | 1.64709900  |
| C  | -0.40459100 | -4.80217700 | 1.29913400  |
| H  | -0.99357700 | -2.74318300 | 1.32794300  |
| C  | 1.95145700  | -5.25746400 | 1.54732000  |
| H  | 3.22753400  | -3.54543800 | 1.77609500  |
| C  | 0.64512400  | -5.71953400 | 1.37490100  |
| H  | -1.42532200 | -5.14992300 | 1.16230100  |
| H  | 2.77803600  | -5.96083100 | 1.60318200  |
| H  | 0.44761700  | -6.78550100 | 1.29796500  |
| Pd | 1.58550900  | -0.00464100 | -0.50126400 |
| S  | -3.92135300 | -0.49987600 | 1.41927500  |
| O  | -2.81449900 | -1.45070300 | 1.66426800  |
| O  | -4.03436200 | 0.69631600  | 2.27601200  |
| N  | -3.94088300 | 0.02302900  | -0.10918400 |
| H  | -4.34251600 | 1.24852900  | -0.28601600 |
| C  | -5.42342400 | -1.48773700 | 1.76882000  |
| C  | -5.30059800 | -2.68051200 | 2.48251500  |
| C  | -6.47199900 | -3.37297700 | 2.79013900  |
| H  | -4.32051800 | -3.03743600 | 2.77427400  |
| C  | -7.69605800 | -1.65071100 | 1.65677700  |
| C  | -7.69537400 | -2.85011500 | 2.37194500  |
| H  | -6.42816700 | -4.30601400 | 3.34519200  |
| H  | -8.62962200 | -1.21355100 | 1.30772100  |
| H  | -8.63034000 | -3.35732100 | 2.58908700  |
| C  | -3.69790300 | -0.87344100 | -1.18300600 |
| C  | -4.69755800 | -1.78899300 | -1.55119100 |
| C  | -2.48723400 | -0.85210100 | -1.92978600 |
| C  | -4.52882600 | -2.66986200 | -2.61727800 |
| H  | -5.62712100 | -1.78223600 | -0.99238400 |
| C  | -2.34168000 | -1.74938500 | -3.00504800 |
| C  | -3.34544500 | -2.64874900 | -3.35395600 |
| H  | -5.32621200 | -3.36170300 | -2.87644800 |
| H  | -1.42896600 | -1.73298900 | -3.59031200 |
| H  | -3.20201800 | -3.32086400 | -4.19484300 |
| N  | -6.58101300 | -0.97369700 | 1.35687000  |
| C  | -1.40587000 | 0.16743400  | -1.70415800 |
| O  | -1.67695100 | 1.32577200  | -1.39979100 |
| C  | 0.01411000  | -0.24657100 | -2.03810700 |
| C  | 0.48560400  | -1.57485100 | -1.78012000 |
| H  | -0.14984300 | -2.15890300 | -1.11739900 |
| C  | 0.92630500  | 0.74721300  | -2.47082000 |
| C  | 1.30757100  | -2.42347100 | -2.66467800 |
| C  | 1.73558000  | -3.67733200 | -2.18948400 |
| C  | 1.57387000  | -2.09696100 | -4.00709500 |

|   |             |             |             |
|---|-------------|-------------|-------------|
| C | 2.42850500  | -4.55733600 | -3.01454700 |
| H | 1.52713200  | -3.95377200 | -1.16091800 |
| C | 2.25956100  | -2.98343000 | -4.83460300 |
| H | 1.23079800  | -1.15104100 | -4.41297200 |
| C | 2.69607000  | -4.21459300 | -4.34237100 |
| H | 2.75920400  | -5.51459400 | -2.62039400 |
| H | 2.45267600  | -2.70988700 | -5.86851800 |
| H | 3.23495600  | -4.90246000 | -4.98834900 |
| H | 1.81224100  | 0.49535300  | -3.04113800 |
| H | 0.57504200  | 1.77221700  | -2.52651500 |
| I | 4.39639600  | -0.57395200 | -1.72107100 |
| N | -4.80110400 | 2.42859500  | -0.48267900 |
| C | -4.75289600 | 2.53001400  | -1.97319600 |
| C | -4.82146000 | 3.92182700  | -2.60635000 |
| H | -5.56474900 | 1.89791800  | -2.34956700 |
| H | -3.80884500 | 2.05979600  | -2.26303000 |
| H | -4.81127300 | 3.80547600  | -3.69631100 |
| H | -5.72486700 | 4.47516900  | -2.33739700 |
| H | -3.94927800 | 4.52654900  | -2.33989600 |
| C | -3.83238000 | 3.29901400  | 0.25361700  |
| C | -4.28643400 | 4.71300200  | 0.62524800  |
| H | -2.92625700 | 3.32349200  | -0.35546900 |
| H | -3.59010400 | 2.74914300  | 1.16784200  |
| H | -3.46525600 | 5.21049000  | 1.15507200  |
| H | -4.54391700 | 5.32811600  | -0.24138800 |
| H | -5.14233000 | 4.70163300  | 1.30748000  |
| C | -6.16665000 | 2.33814600  | 0.12114100  |
| C | -7.22345600 | 3.34908600  | -0.32968800 |
| H | -6.02027000 | 2.38186700  | 1.20371600  |
| H | -6.52238800 | 1.32393500  | -0.08577900 |
| H | -8.14641000 | 3.15408500  | 0.22878200  |
| H | -6.93473800 | 4.38662200  | -0.14214800 |
| H | -7.46181500 | 3.24537500  | -1.39321700 |

**31**

|   |            |             |             |
|---|------------|-------------|-------------|
| S | 4.59793700 | 0.17130500  | -1.37612200 |
| O | 3.79384000 | -0.42094700 | -2.47138000 |
| O | 5.12376300 | 1.53414900  | -1.58702800 |
| C | 6.04076400 | -0.94023400 | -1.22538100 |
| C | 6.08996900 | -2.11123400 | -1.98437600 |
| C | 7.20691500 | -2.93214600 | -1.83570500 |
| H | 5.27684500 | -2.34489200 | -2.66068500 |
| C | 8.05262700 | -1.35881000 | -0.23650600 |
| C | 8.21118600 | -2.55185500 | -0.94450700 |
| H | 7.29306700 | -3.85269700 | -2.40741300 |
| H | 8.81288100 | -1.02719400 | 0.46895600  |
| H | 9.09821700 | -3.16123100 | -0.79870500 |

|   |             |             |             |
|---|-------------|-------------|-------------|
| N | 6.98881000  | -0.56014100 | -0.37118700 |
| C | 5.16623000  | 2.14949000  | 2.64959200  |
| C | 5.06260300  | 1.50749400  | 1.43285600  |
| C | 3.91435300  | 0.72121200  | 1.10530700  |
| C | 2.85612700  | 0.68894500  | 2.08073000  |
| C | 3.01683500  | 1.33366900  | 3.33354800  |
| C | 4.14748800  | 2.06588200  | 3.62482800  |
| H | 6.06707900  | 2.72103200  | 2.86461400  |
| H | 5.87415200  | 1.56065800  | 0.71987800  |
| C | 1.57653100  | 0.03164800  | 1.84989800  |
| H | 2.20603400  | 1.24250800  | 4.04971000  |
| H | 4.25683000  | 2.56551900  | 4.58342200  |
| C | 0.93987700  | 0.66936600  | -0.52374900 |
| H | 0.83692900  | 0.42605000  | -1.57651600 |
| O | 0.75524000  | -0.17328200 | 2.76112200  |
| C | 1.14329300  | -0.35255000 | 0.43211800  |
| C | 0.48999800  | -1.60537800 | 0.27034400  |
| H | 0.39431200  | -2.18546700 | 1.18610800  |
| N | 3.75063100  | -0.04235500 | -0.01086900 |
| H | 1.32856800  | 1.65988700  | -0.31481000 |
| C | 0.35516400  | -2.40473900 | -0.97052100 |
| C | 1.13365600  | -2.17252500 | -2.12052200 |
| C | -0.52783000 | -3.50405200 | -0.96874500 |
| C | 0.98621700  | -2.98863600 | -3.24365800 |
| H | 1.89905100  | -1.40192400 | -2.12739600 |
| C | -0.66966800 | -4.31359400 | -2.09288300 |
| H | -1.10498900 | -3.71958600 | -0.07258400 |
| C | 0.08052100  | -4.05144200 | -3.24347700 |
| H | 1.60620800  | -2.79783600 | -4.11572300 |
| H | -1.35912500 | -5.15377400 | -2.06809200 |
| H | -0.02343000 | -4.68505900 | -4.12060700 |
| P | -2.98058600 | -0.96363700 | 1.08665900  |
| C | -3.93028600 | 0.17907600  | 2.21508100  |
| H | -3.27732800 | 0.34817900  | 3.08039300  |
| H | -4.80897700 | -0.35467700 | 2.59509700  |
| C | -4.35551000 | 1.52660800  | 1.60111200  |
| H | -5.10751300 | 1.96744300  | 2.26835800  |
| H | -4.86380800 | 1.36596400  | 0.64198200  |
| C | -3.22519400 | 2.55928800  | 1.44227100  |
| H | -2.63115700 | 2.60784200  | 2.36348400  |
| H | -3.64623500 | 3.56151600  | 1.30156600  |
| P | -1.99226900 | 2.24298300  | 0.07916600  |
| C | -0.82503500 | 3.64470500  | 0.33706300  |
| C | -0.80722900 | 4.78719600  | -0.47450000 |
| C | 0.09374100  | 3.54177100  | 1.39633300  |
| C | 0.11248000  | 5.80944000  | -0.22666600 |

|              |             |             |             |
|--------------|-------------|-------------|-------------|
| H            | -1.49956600 | 4.88058800  | -1.30516900 |
| C            | 1.00870400  | 4.56473600  | 1.64100400  |
| H            | 0.11532600  | 2.64965100  | 2.01760100  |
| C            | 1.01974900  | 5.70093800  | 0.82774700  |
| H            | 0.12325800  | 6.68695800  | -0.86749900 |
| H            | 1.72842800  | 4.45501300  | 2.44694300  |
| H            | 1.74280200  | 6.49146300  | 1.00773400  |
| C            | -2.88517200 | 2.60248600  | -1.48692600 |
| C            | -3.93644200 | 3.52977900  | -1.57749400 |
| C            | -2.47992300 | 1.92437700  | -2.64832900 |
| C            | -4.56495700 | 3.77127400  | -2.80009400 |
| H            | -4.26934200 | 4.07415900  | -0.69885300 |
| C            | -3.10304000 | 2.17355200  | -3.87174000 |
| H            | -1.67539700 | 1.19643500  | -2.58900800 |
| C            | -4.14822400 | 3.09563000  | -3.94904900 |
| H            | -5.37854900 | 4.48951100  | -2.85415400 |
| H            | -2.77341600 | 1.64401300  | -4.76114700 |
| H            | -4.63764200 | 3.28670700  | -4.90007500 |
| C            | -2.76212500 | -2.43865000 | 2.17212600  |
| C            | -1.72508800 | -2.40031600 | 3.12160600  |
| C            | -3.58625400 | -3.57190600 | 2.09896100  |
| C            | -1.53626100 | -3.47345400 | 3.99396900  |
| H            | -1.04636100 | -1.55104700 | 3.15947600  |
| C            | -3.38316700 | -4.64592300 | 2.96860900  |
| H            | -4.38211000 | -3.62419900 | 1.36261800  |
| C            | -2.36267900 | -4.59708700 | 3.91973000  |
| H            | -0.73076100 | -3.43358900 | 4.72204700  |
| H            | -4.02388100 | -5.52108600 | 2.89925400  |
| H            | -2.20625100 | -5.43483400 | 4.59394700  |
| C            | -4.20488300 | -1.46083500 | -0.19536500 |
| C            | -5.58432900 | -1.55692300 | 0.05529700  |
| C            | -3.73057400 | -1.76250900 | -1.48247400 |
| C            | -6.46496700 | -1.94382100 | -0.95606600 |
| H            | -5.98193600 | -1.33578300 | 1.04145800  |
| C            | -4.61162300 | -2.15718900 | -2.49072400 |
| H            | -2.66724800 | -1.69621200 | -1.69244500 |
| C            | -5.97991800 | -2.24550400 | -2.23066700 |
| H            | -7.52927100 | -2.01031000 | -0.74697000 |
| H            | -4.22561600 | -2.39202400 | -3.47868500 |
| H            | -6.66675100 | -2.54699900 | -3.01685000 |
| Pd           | -1.03400500 | 0.10636700  | 0.23134700  |
| <b>32-ts</b> |             |             |             |
| S            | 4.41309700  | 0.15069000  | -1.35723300 |
| O            | 3.50661600  | -0.19049500 | -2.47843700 |
| O            | 5.11294700  | 1.44639900  | -1.40515600 |
| C            | 5.69041400  | -1.15602600 | -1.38258800 |

|   |             |             |             |
|---|-------------|-------------|-------------|
| C | 5.56904900  | -2.21425100 | -2.28521900 |
| C | 6.56620700  | -3.18872100 | -2.27308600 |
| H | 4.72642700  | -2.24917300 | -2.96460700 |
| C | 7.63793400  | -1.96157900 | -0.51380100 |
| C | 7.62252000  | -3.06430900 | -1.36995300 |
| H | 6.51995200  | -4.03050700 | -2.95901100 |
| H | 8.44438700  | -1.82704300 | 0.20486800  |
| H | 8.41924300  | -3.80091400 | -1.32795300 |
| N | 6.69167500  | -1.01661500 | -0.51793300 |
| C | 5.35933500  | 1.32161800  | 2.92050100  |
| C | 5.10251600  | 0.90124800  | 1.62617100  |
| C | 3.85050500  | 0.33938200  | 1.26148400  |
| C | 2.85981800  | 0.21981000  | 2.30325300  |
| C | 3.17021900  | 0.64757100  | 3.61332700  |
| C | 4.39473000  | 1.20285800  | 3.93434400  |
| H | 6.33352800  | 1.74954700  | 3.14722900  |
| H | 5.87052700  | 0.99339300  | 0.87052300  |
| C | 1.51072100  | -0.37399700 | 2.13704700  |
| H | 2.40135300  | 0.51622500  | 4.36814000  |
| H | 4.60887000  | 1.52914300  | 4.94809300  |
| C | 1.40168200  | 0.31053000  | -0.24339900 |
| H | 1.29275700  | 0.15330300  | -1.30699500 |
| O | 0.80008500  | -0.67357600 | 3.10150700  |
| C | 1.01852100  | -0.63152900 | 0.72887100  |
| C | 0.20482300  | -1.77493300 | 0.49658200  |
| H | -0.04470500 | -2.32026800 | 1.40358200  |
| N | 3.54218800  | -0.11837400 | -0.00675900 |
| H | 1.69530200  | 1.30317000  | 0.06680800  |
| C | 0.07226400  | -2.58214900 | -0.74065700 |
| C | 0.90496200  | -2.44600400 | -1.86935600 |
| C | -0.90399900 | -3.60104200 | -0.75940600 |
| C | 0.72707300  | -3.26823700 | -2.98378900 |
| H | 1.72402700  | -1.73546900 | -1.87627400 |
| C | -1.07471400 | -4.42018300 | -1.87196900 |
| H | -1.53496900 | -3.74245800 | 0.11492900  |
| C | -0.26454000 | -4.25044200 | -2.99879700 |
| H | 1.38477700  | -3.14341900 | -3.84018700 |
| H | -1.83637300 | -5.19571900 | -1.85710400 |
| H | -0.39279300 | -4.88957500 | -3.86847100 |
| P | -3.22546200 | -0.63102800 | 0.89783900  |
| C | -4.09587100 | 0.68958200  | 1.89331000  |
| H | -3.54056200 | 0.75871500  | 2.83704000  |
| H | -5.09775000 | 0.33126600  | 2.15722500  |
| C | -4.18879600 | 2.08047600  | 1.23436700  |
| H | -4.95290800 | 2.64959200  | 1.78007600  |
| H | -4.56100800 | 1.99304200  | 0.20562400  |

|   |             |             |             |
|---|-------------|-------------|-------------|
| C | -2.89409500 | 2.91466300  | 1.26293900  |
| H | -2.45059500 | 2.88205000  | 2.26615700  |
| H | -3.12368500 | 3.96865300  | 1.06755300  |
| P | -1.53881600 | 2.36864200  | 0.09871400  |
| C | -0.21341000 | 3.58309900  | 0.51508800  |
| C | 0.10158000  | 4.69361700  | -0.28098000 |
| C | 0.53422400  | 3.34887800  | 1.68281800  |
| C | 1.13822700  | 5.55388300  | 0.08933200  |
| H | -0.45026100 | 4.88601400  | -1.19555800 |
| C | 1.56561200  | 4.21157700  | 2.05159800  |
| H | 0.32716900  | 2.47461800  | 2.29598700  |
| C | 1.87020100  | 5.31670900  | 1.25324900  |
| H | 1.37834500  | 6.40545800  | -0.54159100 |
| H | 2.14656100  | 4.00090800  | 2.94481700  |
| H | 2.68474300  | 5.98023100  | 1.52966200  |
| C | -2.14000600 | 2.84131000  | -1.57542800 |
| C | -2.96761700 | 3.95051200  | -1.81702800 |
| C | -1.73617300 | 2.05247200  | -2.66519600 |
| C | -3.37742600 | 4.26180100  | -3.11448400 |
| H | -3.29360100 | 4.58407500  | -0.99727100 |
| C | -2.13969000 | 2.36871900  | -3.96325700 |
| H | -1.10551500 | 1.18438300  | -2.49131900 |
| C | -2.96299500 | 3.47275400  | -4.18978200 |
| H | -4.01875400 | 5.12248900  | -3.28450600 |
| H | -1.81249400 | 1.74994100  | -4.79406800 |
| H | -3.28180800 | 3.71773200  | -5.19923500 |
| C | -3.38770800 | -2.07876000 | 2.03243300  |
| C | -2.43571300 | -2.21025600 | 3.05959100  |
| C | -4.41492800 | -3.02813500 | 1.92616900  |
| C | -2.52794600 | -3.26241700 | 3.97205500  |
| H | -1.60668700 | -1.50940300 | 3.13576100  |
| C | -4.49454100 | -4.08545400 | 2.83539300  |
| H | -5.15091000 | -2.94901100 | 1.13200200  |
| C | -3.55540000 | -4.20237200 | 3.86155500  |
| H | -1.78500800 | -3.35251800 | 4.75976100  |
| H | -5.29201800 | -4.81773200 | 2.73913100  |
| H | -3.61879600 | -5.02671200 | 4.56683800  |
| C | -4.37200300 | -0.97127000 | -0.50456800 |
| C | -5.75858400 | -0.75261300 | -0.44367400 |
| C | -3.82118600 | -1.47529100 | -1.69465100 |
| C | -6.57147000 | -1.03055700 | -1.54418400 |
| H | -6.21617000 | -0.36635600 | 0.46219100  |
| C | -4.63626000 | -1.76178900 | -2.79069900 |
| H | -2.75120100 | -1.64911600 | -1.75925700 |
| C | -6.01210100 | -1.53679300 | -2.71921500 |
| H | -7.64168900 | -0.85209100 | -1.48168000 |



|              |             |             |             |
|--------------|-------------|-------------|-------------|
| H            | -4.19233900 | -2.15557200 | -3.70080600 |
| H            | -6.64610500 | -1.75243500 | -3.57501800 |
| Pd           | -1.02727500 | 0.07649600  | 0.35078300  |
| <b>33-ts</b> |             |             |             |
| P            | 1.75851700  | -0.95977000 | 1.34999100  |
| C            | 2.41858000  | 0.10257000  | 2.72909400  |
| H            | 3.22181800  | 0.68839600  | 2.26796300  |
| H            | 2.88514700  | -0.56404000 | 3.46298700  |
| C            | 1.44193800  | 1.06175300  | 3.42533800  |
| H            | 1.97332800  | 1.47691800  | 4.29155500  |
| H            | 0.57700600  | 0.52379800  | 3.83272900  |
| C            | 0.99086600  | 2.25107800  | 2.56400100  |
| H            | 1.84627900  | 2.65736300  | 2.01210700  |
| H            | 0.59359800  | 3.04757100  | 3.20296300  |
| P            | -0.33096000 | 1.86698300  | 1.30869200  |
| C            | -0.74214700 | 3.55789200  | 0.70147400  |
| C            | -2.05610000 | 4.05101200  | 0.68148400  |
| C            | 0.30264300  | 4.36405500  | 0.21554800  |
| C            | -2.31726900 | 5.34054100  | 0.21460700  |
| H            | -2.87814800 | 3.43549300  | 1.03213300  |
| C            | 0.03264300  | 5.65129700  | -0.24926400 |
| H            | 1.32284300  | 3.98921200  | 0.17377800  |
| C            | -1.27378100 | 6.14503700  | -0.24617300 |
| H            | -3.33862500 | 5.71243900  | 0.21087100  |
| H            | 0.85064400  | 6.26245000  | -0.61996900 |
| H            | -1.47842900 | 7.14971700  | -0.60711300 |
| C            | -1.74772500 | 1.39837100  | 2.39645200  |
| C            | -2.37794600 | 0.15460300  | 2.27099400  |
| C            | -2.16747200 | 2.26813300  | 3.42145700  |
| C            | -3.39931500 | -0.21646800 | 3.15009300  |
| H            | -2.07836100 | -0.53647400 | 1.49349400  |
| C            | -3.18970600 | 1.89916900  | 4.29314900  |
| H            | -1.70280100 | 3.24333200  | 3.53333300  |
| C            | -3.80688100 | 0.65155200  | 4.16092000  |
| H            | -3.86396600 | -1.19067000 | 3.03652900  |
| H            | -3.50238800 | 2.58402200  | 5.07687900  |
| H            | -4.60013400 | 0.36222700  | 4.84539100  |
| C            | 3.24835700  | -2.01963500 | 1.06248600  |
| C            | 4.50510900  | -1.41012600 | 0.90042400  |
| C            | 3.16866100  | -3.42109100 | 1.08252100  |
| C            | 5.65683300  | -2.19212200 | 0.80641700  |
| H            | 4.59051700  | -0.32823800 | 0.83214500  |
| C            | 4.32427700  | -4.19604500 | 0.97443100  |
| H            | 2.20989000  | -3.91384100 | 1.20432500  |
| C            | 5.57247800  | -3.58454200 | 0.84793700  |
| H            | 6.62100100  | -1.70330700 | 0.69440400  |

|    |             |             |             |
|----|-------------|-------------|-------------|
| H  | 4.24562700  | -5.27988900 | 1.00012500  |
| H  | 6.47252500  | -4.19002700 | 0.77796200  |
| C  | 0.58726100  | -2.13091700 | 2.16448600  |
| C  | 0.61794100  | -2.40312200 | 3.54204900  |
| C  | -0.34927700 | -2.80691800 | 1.36710700  |
| C  | -0.27417500 | -3.31708100 | 4.10476900  |
| H  | 1.34013500  | -1.91071700 | 4.18487100  |
| C  | -1.23657800 | -3.72779700 | 1.92810500  |
| H  | -0.39309600 | -2.62645300 | 0.29752400  |
| C  | -1.20320900 | -3.98100700 | 3.30024600  |
| H  | -0.23906200 | -3.51237200 | 5.17340800  |
| H  | -1.95638000 | -4.22510700 | 1.28591900  |
| H  | -1.89414500 | -4.69416200 | 3.74259400  |
| Pd | 0.59622300  | 0.35853100  | -0.39041800 |
| S  | -3.02847800 | -1.97655300 | -1.84209900 |
| O  | -3.42918600 | -1.79882000 | -3.24134100 |
| O  | -2.01071800 | -2.95923400 | -1.45697900 |
| N  | -2.49114600 | -0.50775300 | -1.18974300 |
| H  | -1.53157800 | -0.60937100 | -0.84244500 |
| C  | -4.55709100 | -2.37048500 | -0.93515300 |
| C  | -5.73266400 | -2.54952900 | -1.66268800 |
| C  | -6.87243600 | -2.91929000 | -0.94517000 |
| H  | -5.74030400 | -2.40765800 | -2.73667500 |
| C  | -5.53506100 | -2.88398400 | 1.04870300  |
| C  | -6.77389700 | -3.08998100 | 0.43434900  |
| H  | -7.81681500 | -3.07401700 | -1.45881300 |
| H  | -5.42052600 | -3.01158800 | 2.12276900  |
| H  | -7.63482300 | -3.37923600 | 1.02875500  |
| C  | -2.80096500 | 0.74509100  | -1.78472200 |
| C  | -4.15156100 | 1.05152300  | -2.00436300 |
| C  | -1.80764800 | 1.68983900  | -2.14112600 |
| C  | -4.53041800 | 2.24985700  | -2.59873300 |
| H  | -4.90894400 | 0.33853700  | -1.69770100 |
| C  | -2.22220700 | 2.90429700  | -2.71888800 |
| C  | -3.56014800 | 3.18581700  | -2.96081600 |
| H  | -5.58455400 | 2.45534900  | -2.76329200 |
| H  | -1.45051800 | 3.62294100  | -2.96984100 |
| H  | -3.84386100 | 4.13035200  | -3.41519100 |
| N  | -4.43462900 | -2.52878200 | 0.37730100  |
| I  | 4.01488400  | 2.45249000  | -0.08799100 |
| C  | -0.31466500 | 1.57819400  | -1.93540300 |
| O  | 0.43429700  | 2.46741000  | -2.27523800 |
| C  | 0.54279400  | -0.16510500 | -2.57188800 |
| C  | 1.88907600  | -0.22028400 | -2.21692100 |
| H  | 2.43833400  | 0.71892300  | -2.11001500 |
| C  | -0.21165700 | -0.60891200 | -3.57837500 |

|           |             |             |             |
|-----------|-------------|-------------|-------------|
| H         | 0.28796800  | -0.96137000 | -4.48107100 |
| H         | -1.29266700 | -0.58990500 | -3.60532200 |
| C         | 2.70433700  | -1.42484600 | -2.38701100 |
| C         | 4.10181600  | -1.26160200 | -2.45063400 |
| C         | 2.15302500  | -2.70182600 | -2.62070000 |
| C         | 4.92125600  | -2.33833600 | -2.78182700 |
| H         | 4.52814700  | -0.28236300 | -2.24883700 |
| C         | 2.97949600  | -3.77461500 | -2.93574100 |
| H         | 1.07853900  | -2.84525200 | -2.55742300 |
| C         | 4.36465000  | -3.59510700 | -3.02576400 |
| H         | 5.99645800  | -2.19587400 | -2.84166600 |
| H         | 2.54464200  | -4.75433200 | -3.11464700 |
| H         | 5.00589800  | -4.43506800 | -3.27953600 |
| <b>34</b> |             |             |             |
| P         | -1.17596900 | 2.24042400  | 0.31636800  |
| C         | -2.41631500 | 3.43514600  | 1.07295300  |
| H         | -2.91452600 | 3.91364600  | 0.22228200  |
| H         | -1.82356300 | 4.21513700  | 1.56332800  |
| C         | -3.49117000 | 2.89201100  | 2.02682500  |
| H         | -3.93265100 | 3.75252900  | 2.54700200  |
| H         | -3.05754600 | 2.26054200  | 2.81222400  |
| C         | -4.61661700 | 2.14505300  | 1.29789700  |
| H         | -4.91292300 | 2.70936100  | 0.40531200  |
| H         | -5.49718000 | 2.07651200  | 1.94537600  |
| P         | -4.16505200 | 0.40513900  | 0.74962900  |
| C         | -5.45302400 | 0.12333300  | -0.54288500 |
| C         | -6.76495300 | 0.61055100  | -0.39718400 |
| C         | -5.10622600 | -0.52741700 | -1.73743700 |
| C         | -7.70585000 | 0.43986800  | -1.41317600 |
| H         | -7.06242400 | 1.12644200  | 0.51105700  |
| C         | -6.04876800 | -0.69244000 | -2.75501600 |
| H         | -4.10303300 | -0.91935300 | -1.86451600 |
| C         | -7.34891800 | -0.21234700 | -2.59550800 |
| H         | -8.71586100 | 0.81885600  | -1.28073000 |
| H         | -5.76085300 | -1.20106200 | -3.67087800 |
| H         | -8.08136300 | -0.34332100 | -3.38767600 |
| C         | -4.66406200 | -0.53794500 | 2.25598900  |
| C         | -5.92680300 | -1.12179200 | 2.42148400  |
| C         | -3.73210700 | -0.62782600 | 3.30249600  |
| C         | -6.25463200 | -1.76823900 | 3.61523300  |
| H         | -6.65174100 | -1.09388700 | 1.61480300  |
| C         | -4.06624900 | -1.26217200 | 4.49877300  |
| H         | -2.72849000 | -0.23314700 | 3.16711200  |
| C         | -5.33013500 | -1.83398000 | 4.65856100  |
| H         | -7.23383500 | -2.22707000 | 3.72450900  |
| H         | -3.33144300 | -1.32741200 | 5.29683900  |

|    |             |             |             |
|----|-------------|-------------|-------------|
| H  | -5.58751800 | -2.33982300 | 5.58525700  |
| C  | -0.78079900 | 3.20735800  | -1.20585900 |
| C  | -1.53870600 | 2.94501000  | -2.35859000 |
| C  | 0.13616400  | 4.26933500  | -1.22291500 |
| C  | -1.38083900 | 3.72529100  | -3.50491400 |
| H  | -2.24449300 | 2.11805600  | -2.36021700 |
| C  | 0.30060300  | 5.04034700  | -2.37520100 |
| H  | 0.73005000  | 4.49322200  | -0.34296100 |
| C  | -0.45635600 | 4.77158200  | -3.51672900 |
| H  | -1.97094700 | 3.50583200  | -4.39055200 |
| H  | 1.02350000  | 5.85153400  | -2.37795600 |
| H  | -0.32418100 | 5.37245100  | -4.41234400 |
| C  | 0.28093500  | 2.43115300  | 1.42894100  |
| C  | 0.08870400  | 2.66087800  | 2.80290700  |
| C  | 1.59366200  | 2.31091600  | 0.94395900  |
| C  | 1.17990100  | 2.78552900  | 3.66295200  |
| H  | -0.91153700 | 2.74911400  | 3.21476900  |
| C  | 2.68531500  | 2.44920700  | 1.80420700  |
| H  | 1.78604000  | 2.10482200  | -0.10294300 |
| C  | 2.48014700  | 2.68864200  | 3.16382200  |
| H  | 1.01012100  | 2.96740000  | 4.72109900  |
| H  | 3.68943300  | 2.36806000  | 1.39908900  |
| H  | 3.33016200  | 2.79916100  | 3.83209300  |
| Pd | -1.87349900 | 0.03223700  | -0.01006500 |
| S  | 6.06220700  | 0.72404200  | -0.18482200 |
| O  | 5.90567000  | 0.34977900  | -1.58555500 |
| O  | 5.85237900  | 2.09425800  | 0.28868700  |
| N  | 5.08482700  | -0.25983300 | 0.79201400  |
| H  | 5.43865800  | -0.18478400 | 1.74571800  |
| C  | 7.75976400  | 0.27092600  | 0.29959400  |
| C  | 8.75283300  | 0.18878100  | -0.67352500 |
| C  | 10.04762000 | -0.09679700 | -0.23770200 |
| H  | 8.50751500  | 0.33431600  | -1.71924700 |
| C  | 9.19514500  | -0.19561300 | 2.00577500  |
| C  | 10.27537500 | -0.28957200 | 1.12511200  |
| H  | 10.86276800 | -0.17250300 | -0.95176000 |
| H  | 9.33077600  | -0.35115000 | 3.07384400  |
| H  | 11.26745900 | -0.51567300 | 1.50310600  |
| C  | 4.78700700  | -1.60863100 | 0.39193300  |
| C  | 5.68110200  | -2.64399500 | 0.68759900  |
| C  | 3.54692700  | -1.89799600 | -0.21002200 |
| C  | 5.37796100  | -3.96237400 | 0.34999500  |
| H  | 6.61533500  | -2.40703100 | 1.18854900  |
| C  | 3.25734900  | -3.23016600 | -0.53825700 |
| C  | 4.16810400  | -4.25359000 | -0.28033100 |
| H  | 6.08474200  | -4.75537000 | 0.57843400  |

|           |             |             |             |
|-----------|-------------|-------------|-------------|
| H         | 2.30613400  | -3.45816900 | -1.00723700 |
| H         | 3.92465000  | -5.27575000 | -0.55588400 |
| N         | 7.94868600  | 0.08216400  | 1.60381800  |
| I         | -2.56370800 | -2.67093200 | 0.11710400  |
| C         | 2.53144600  | -0.82311300 | -0.53167700 |
| O         | 2.86370500  | 0.17604600  | -1.15229100 |
| C         | 1.10655300  | -1.01701200 | -0.06488000 |
| C         | 0.90707600  | -1.65210600 | 1.10136100  |
| C         | 0.05937800  | -0.35467500 | -0.93314100 |
| H         | 1.73340800  | -2.08951400 | 1.65479000  |
| H         | -0.08245100 | -1.74434300 | 1.53314800  |
| C         | -0.14758100 | -1.04603900 | -2.25661400 |
| C         | -0.07926800 | -2.44415500 | -2.40989400 |
| C         | -0.36690900 | -0.27949900 | -3.41762900 |
| C         | -0.23952700 | -3.04408200 | -3.65794900 |
| H         | 0.07297500  | -3.06539300 | -1.53476600 |
| C         | -0.53830700 | -0.87757000 | -4.66540300 |
| H         | -0.38005700 | 0.80331000  | -3.34018700 |
| C         | -0.47778500 | -2.26678700 | -4.79379900 |
| H         | -0.18453500 | -4.12681600 | -3.74121500 |
| H         | -0.69971900 | -0.25466900 | -5.54231100 |
| H         | -0.60307300 | -2.73644100 | -5.76604200 |
| H         | 0.44809000  | 0.63582700  | -1.17700200 |
| <b>35</b> |             |             |             |
| S         | -1.01086900 | -1.70131100 | 0.56358400  |
| O         | -0.65888000 | -2.82711600 | -0.30372000 |
| O         | -1.19804700 | -1.90336600 | 2.00262600  |
| C         | -2.54922000 | -0.94322300 | -0.04398100 |
| C         | -3.68287400 | -0.94809800 | 0.76543900  |
| C         | -4.84192400 | -0.38375300 | 0.22866800  |
| H         | -3.64633400 | -1.37076100 | 1.76225600  |
| C         | -3.59685200 | 0.10148700  | -1.76848700 |
| C         | -4.80038100 | 0.14982700  | -1.05894200 |
| H         | -5.75906900 | -0.35901900 | 0.81017100  |
| H         | -3.52135900 | 0.51562700  | -2.77128200 |
| H         | -5.67939400 | 0.60085800  | -1.50860100 |
| N         | -2.48141900 | -0.44174800 | -1.27068000 |
| C         | -0.10340200 | 2.05249500  | 3.00260500  |
| C         | -0.02592800 | 0.80511500  | 2.38648500  |
| C         | 0.11489200  | 0.72311400  | 0.99401200  |
| C         | 0.20321200  | 1.90878000  | 0.23156500  |
| C         | 0.13391300  | 3.15270100  | 0.87538700  |
| C         | -0.02370800 | 3.23166800  | 2.25308800  |
| H         | -0.20960100 | 2.10172200  | 4.08300800  |
| H         | -0.07195700 | -0.10495000 | 2.96988500  |
| C         | 0.35435600  | 1.87334000  | -1.24779300 |

|              |             |                            |             |
|--------------|-------------|----------------------------|-------------|
| H            | 0.20185300  | 4.04269700                 | 0.25794200  |
| H            | -0.07546700 | 4.19868300                 | 2.74488300  |
| C            | 1.02853800  | -0.59387900                | -0.91040300 |
| H            | 0.77121800  | -1.53845000                | -1.39093900 |
| O            | 0.22021100  | 2.88354100                 | -1.93124500 |
| C            | 0.68190500  | 0.54291400                 | -1.85121800 |
| C            | 0.68112900  | 0.40672500                 | -3.18182100 |
| H            | 0.45578800  | 1.26035600                 | -3.81382100 |
| N            | 0.19848300  | -0.53501900                | 0.32865800  |
| C            | 2.50742300  | -0.66305200                | -0.50615200 |
| C            | 2.93955900  | -1.77416400                | 0.23344100  |
| C            | 3.43818800  | 0.31977100                 | -0.85489900 |
| C            | 4.27213000  | -1.89544400                | 0.61980200  |
| H            | 2.22267900  | -2.54525800                | 0.50356000  |
| C            | 4.77538500  | 0.20119600                 | -0.46311700 |
| H            | 3.13060400  | 1.17743000                 | -1.44451800 |
| C            | 5.19583000  | -0.90385800                | 0.27475900  |
| H            | 4.59159000  | -2.76500600                | 1.18810900  |
| H            | 5.48541600  | 0.97626100                 | -0.73930500 |
| H            | 6.23562700  | -0.99671600                | 0.57686200  |
| H            | 0.90357300  | -0.54157500                | -3.66331300 |
| <b>36-ts</b> |             |                            |             |
| P            | 1.63870000  | -1.46587900                | -1.22689200 |
| C            | 1.52780300  | -0.70686800                | -2.92795500 |
| H            | 0.47415500  | -0.45409400                | -3.08913800 |
| H            | 1.80171600  | -1.46027800                | -3.67532200 |
| C            | 2.40008700  | 0.54936400                 | -3.12402600 |
| H            | 2.47092100  | 0.73065100                 | -4.20490700 |
| H            | 3.42373400  | 0.34952900                 | -2.78645800 |
| C            | 1.86716300  | 1.85114600                 | -2.49363700 |
| H            | 0.82456100  | 2.00371300                 | -2.79012900 |
| H            | 2.43838400  | 2.70685800                 | -2.87341100 |
| P            | 1.83898200  | 1.95444400                 | -0.63457500 |
| C            | 1.31024300  | 3.71257700                 | -0.38252700 |
| C            | 2.20701600  | 4.70053700                 | 0.05287400  |
| C            | -0.02240400 | 4.07463600                 | -0.64234000 |
| C            | 1.78291800  | 6.02056700                 | 0.21804500  |
| H            | 3.23854200  | 4.44603700                 | 0.26888300  |
| C            | -0.43904500 | 5.39643900                 | -0.48047400 |
| H            | -0.73107100 | 3.31922600                 | -0.96267000 |
| C            | 0.46007800  | 6.37364500                 | -0.04926800 |
| H            | 2.49107600  | 6.77122400                 | 0.55936200  |
| H            | -1.47429000 | 5.65961000                 | -0.68279000 |
| H            | 0.13088100  | 7.40116800                 | 0.08236000  |
| C            | 3.60637100  | 1.97921000                 | -0.10650000 |
| C            | 3.88587200  | 1.76317400 <sub>S153</sub> | 1.25530700  |

|    |             |             |             |
|----|-------------|-------------|-------------|
| C  | 4.66993000  | 2.22791800  | -0.98755500 |
| C  | 5.20235800  | 1.79346900  | 1.71667700  |
| H  | 3.06923300  | 1.58493700  | 1.94992300  |
| C  | 5.98715300  | 2.24412000  | -0.52275100 |
| H  | 4.48352200  | 2.41446400  | -2.04060700 |
| C  | 6.25592300  | 2.02667100  | 0.82925600  |
| H  | 5.40219800  | 1.62877000  | 2.77208900  |
| H  | 6.80083800  | 2.42960400  | -1.21909400 |
| H  | 7.28119200  | 2.04190600  | 1.18983100  |
| C  | 0.78978700  | -3.09091000 | -1.45229300 |
| C  | -0.25041900 | -3.26547500 | -2.37824900 |
| C  | 1.18021200  | -4.18275600 | -0.65781400 |
| C  | -0.86734600 | -4.51110600 | -2.52215800 |
| H  | -0.60589700 | -2.43365500 | -2.97408900 |
| C  | 0.56017400  | -5.42367400 | -0.80367200 |
| H  | 1.97162600  | -4.06328800 | 0.07451700  |
| C  | -0.46225600 | -5.59407300 | -1.74071300 |
| H  | -1.66638100 | -4.62967600 | -3.24964500 |
| H  | 0.88121300  | -6.25845000 | -0.18608900 |
| H  | -0.93965100 | -6.56349900 | -1.85901800 |
| C  | 3.40843100  | -1.98070800 | -1.10629000 |
| C  | 4.11947700  | -1.72398700 | 0.07384500  |
| C  | 4.05730000  | -2.64621300 | -2.16087200 |
| C  | 5.45557400  | -2.11692100 | 0.19451200  |
| H  | 3.62006500  | -1.23323600 | 0.90247500  |
| C  | 5.39138500  | -3.03191000 | -2.04132200 |
| H  | 3.51802300  | -2.87741700 | -3.07576100 |
| C  | 6.09372300  | -2.76628500 | -0.86172000 |
| H  | 5.99218700  | -1.91199900 | 1.11664200  |
| H  | 5.88155400  | -3.54476700 | -2.86496700 |
| H  | 7.13312400  | -3.07031700 | -0.76791400 |
| Pd | 0.80994200  | 0.13509000  | 0.46668700  |
| S  | -2.37116800 | 0.43599200  | -1.38893100 |
| O  | -1.31242600 | 1.39253100  | -1.78357200 |
| O  | -2.38881900 | -0.87924700 | -2.05574200 |
| N  | -2.38968300 | 0.15192200  | 0.21651000  |
| H  | -2.99829300 | -0.92974900 | 0.55336500  |
| C  | -3.90544800 | 1.29873700  | -1.93192100 |
| C  | -3.78888900 | 2.42790000  | -2.74414500 |
| C  | -4.96568000 | 3.01367700  | -3.21188300 |
| H  | -2.81006300 | 2.81618600  | -2.99518600 |
| C  | -6.18624200 | 1.32491100  | -2.02900300 |
| C  | -6.19017600 | 2.45321600  | -2.85097000 |
| H  | -4.92420300 | 3.89361200  | -3.84794500 |
| H  | -7.11996500 | 0.85914800  | -1.71998800 |
| H  | -7.12905300 | 2.87718400  | -3.19339500 |

|           |             |             |             |
|-----------|-------------|-------------|-------------|
| C         | -2.50582500 | 1.25986800  | 1.12556900  |
| C         | -3.80574500 | 1.74402900  | 1.37098400  |
| C         | -1.42691500 | 1.81617200  | 1.85898800  |
| C         | -4.05829600 | 2.76316300  | 2.28361700  |
| H         | -4.62590600 | 1.29230700  | 0.82362900  |
| C         | -1.71098800 | 2.84677600  | 2.77824600  |
| C         | -2.99682600 | 3.32531300  | 2.99272000  |
| H         | -5.07703700 | 3.10885700  | 2.44075200  |
| H         | -0.87258400 | 3.25561500  | 3.33037000  |
| H         | -3.16882000 | 4.12142600  | 3.71219100  |
| N         | -5.06492900 | 0.75283500  | -1.57486200 |
| C         | 0.05992500  | 1.44248100  | 1.80540500  |
| O         | 0.81086000  | 1.98924000  | 2.59189200  |
| N         | -3.60746900 | -2.08068300 | 0.91340600  |
| C         | -4.21969500 | -1.89811100 | 2.26092000  |
| C         | -3.24126000 | -1.48178000 | 3.35659600  |
| H         | -4.72956700 | -2.82298200 | 2.55611900  |
| H         | -4.99285900 | -1.13017500 | 2.14281700  |
| H         | -3.80024700 | -1.34334500 | 4.28920100  |
| H         | -2.46754400 | -2.23201100 | 3.53591600  |
| H         | -2.73755900 | -0.54116200 | 3.12359400  |
| C         | -2.49460300 | -3.08519000 | 0.87200000  |
| C         | -2.72346900 | -4.44510400 | 1.53692600  |
| H         | -1.62892200 | -2.61048000 | 1.33889300  |
| H         | -2.24472900 | -3.21555700 | -0.18372300 |
| H         | -1.79477200 | -5.01683900 | 1.43963000  |
| H         | -2.93687700 | -4.35650100 | 2.60709600  |
| H         | -3.52321600 | -5.03036900 | 1.07556100  |
| C         | -4.65208400 | -2.27680400 | -0.14051000 |
| C         | -5.60303300 | -3.47118900 | -0.01047600 |
| H         | -4.11696100 | -2.32174400 | -1.09120800 |
| H         | -5.23119600 | -1.34995200 | -0.16510100 |
| H         | -6.36042800 | -3.39086700 | -0.79914800 |
| H         | -5.09701600 | -4.43069900 | -0.14314400 |
| H         | -6.13276400 | -3.49130700 | 0.94752100  |
| I         | 0.81338400  | -1.72997600 | 2.54812700  |
| <b>37</b> |             |             |             |
| P         | -2.23620400 | 0.52778200  | -0.94871500 |
| C         | -2.89994700 | -0.61960900 | -2.26956900 |
| H         | -2.54787700 | -0.18194700 | -3.21292700 |
| H         | -3.99402900 | -0.54296300 | -2.29465500 |
| C         | -2.48003800 | -2.09909900 | -2.20638700 |
| H         | -3.02046500 | -2.62306000 | -3.00570900 |
| H         | -2.81767100 | -2.55790500 | -1.26978400 |
| C         | -0.97606900 | -2.36711200 | -2.41309000 |
| H         | -0.58150600 | -1.68188800 | -3.17233500 |



|   |             |             |             |
|---|-------------|-------------|-------------|
| H | -0.82727600 | -3.38510400 | -2.79117000 |
| P | 0.06973800  | -2.18681300 | -0.87610000 |
| C | 1.73164400  | -2.73493700 | -1.45323500 |
| C | 2.58244000  | -3.46522900 | -0.60714300 |
| C | 2.20196800  | -2.35432000 | -2.72159100 |
| C | 3.86444500  | -3.81860500 | -1.03016800 |
| H | 2.24817500  | -3.74243400 | 0.38522900  |
| C | 3.48338500  | -2.71278400 | -3.14114000 |
| H | 1.57666500  | -1.77133400 | -3.39091200 |
| C | 4.31789100  | -3.44799800 | -2.29713700 |
| H | 4.50994200  | -4.38346600 | -0.36300000 |
| H | 3.82721600  | -2.41694800 | -4.12883600 |
| H | 5.31571300  | -3.72773600 | -2.62443800 |
| C | -0.55565600 | -3.56019000 | 0.17529800  |
| C | -1.23220000 | -3.26724100 | 1.36765100  |
| C | -0.42196100 | -4.90130100 | -0.22187800 |
| C | -1.76625100 | -4.29531300 | 2.14772900  |
| H | -1.33624700 | -2.23540400 | 1.68778700  |
| C | -0.95280500 | -5.92638500 | 0.56018400  |
| H | 0.11179700  | -5.14864700 | -1.13562000 |
| C | -1.62645100 | -5.62420000 | 1.74689300  |
| H | -2.28639200 | -4.05339700 | 3.07030700  |
| H | -0.83793300 | -6.96015700 | 0.24528700  |
| H | -2.03776400 | -6.42395200 | 2.35706600  |
| C | -3.00810600 | 2.10972300  | -1.52501800 |
| C | -2.22248600 | 3.06332800  | -2.18810700 |
| C | -4.38417600 | 2.34690500  | -1.36222800 |
| C | -2.81028600 | 4.22911100  | -2.68809500 |
| H | -1.15259600 | 2.91142900  | -2.28522200 |
| C | -4.96378900 | 3.51227800  | -1.86197900 |
| H | -5.00423100 | 1.62675400  | -0.83555700 |
| C | -4.17705700 | 4.45564200  | -2.52882900 |
| H | -2.18882000 | 4.96521700  | -3.19082600 |
| H | -6.02845600 | 3.68566900  | -1.72687900 |
| H | -4.62890000 | 5.36639700  | -2.91349700 |
| C | -3.23114000 | 0.13250500  | 0.55960900  |
| C | -2.87041500 | 0.79301800  | 1.74922700  |
| C | -4.29497900 | -0.78119200 | 0.59635000  |
| C | -3.55981600 | 0.54848400  | 2.93650000  |
| H | -2.04665800 | 1.50210600  | 1.74171200  |
| C | -4.97850400 | -1.03270300 | 1.78983000  |
| H | -4.60545900 | -1.30464800 | -0.30245100 |
| C | -4.61342400 | -0.36947800 | 2.96148100  |
| H | -3.26895400 | 1.07206700  | 3.84311700  |
| H | -5.79926100 | -1.74535000 | 1.79846200  |
| H | -5.14666900 | -0.56441200 | 3.88811000  |

|    |            |             |             |
|----|------------|-------------|-------------|
| Pd | 0.10991600 | -0.03395900 | -0.00115700 |
| S  | 1.36179300 | 2.92734100  | -0.36459300 |
| O  | 0.85277100 | 2.57581800  | -1.70788900 |
| O  | 1.27996100 | 4.32324600  | 0.08823400  |
| N  | 0.63331600 | 1.89927600  | 0.69614600  |
| C  | 3.13427500 | 2.48175300  | -0.40819000 |
| C  | 3.65581900 | 1.85874800  | -1.54359900 |
| C  | 5.01266800 | 1.53655600  | -1.53102800 |
| H  | 3.01507800 | 1.65048000  | -2.39127100 |
| C  | 5.13569800 | 2.46157400  | 0.67868500  |
| C  | 5.76996700 | 1.84131400  | -0.39976500 |
| H  | 5.46986000 | 1.05455800  | -2.39092900 |
| H  | 5.69006000 | 2.71430100  | 1.58036200  |
| H  | 6.82863600 | 1.60542300  | -0.34947500 |
| C  | 1.08370300 | 1.84825100  | 2.02916300  |
| C  | 1.21614700 | 2.95443800  | 2.88780000  |
| C  | 1.37140000 | 0.56066800  | 2.52528200  |
| C  | 1.61213800 | 2.75287100  | 4.20624700  |
| H  | 1.01961800 | 3.94883500  | 2.50496900  |
| C  | 1.77323200 | 0.37139200  | 3.85717100  |
| C  | 1.88691400 | 1.46783600  | 4.70231700  |
| H  | 1.70453900 | 3.61262900  | 4.86563100  |
| H  | 1.98910100 | -0.63615400 | 4.19975400  |
| H  | 2.18399100 | 1.33413300  | 5.73881300  |
| N  | 3.83758400 | 2.78422900  | 0.67897200  |
| C  | 1.26823700 | -0.58060400 | 1.57049400  |
| O  | 1.68778500 | -1.69232700 | 1.82010200  |

**38-ts**

|   |             |             |             |
|---|-------------|-------------|-------------|
| P | -1.05464700 | -0.30046200 | -2.16636000 |
| C | 0.03102500  | 0.57769100  | -3.41055500 |
| H | -0.59482000 | 0.90174400  | -4.25001600 |
| H | 0.73364200  | -0.16975100 | -3.78388700 |
| C | 0.83563700  | 1.76375700  | -2.84616500 |
| H | 1.30347000  | 2.27207200  | -3.69920300 |
| H | 1.65514100  | 1.36910300  | -2.23881300 |
| C | 0.00521400  | 2.79570900  | -2.05590400 |
| H | -1.00182400 | 2.87359500  | -2.48062000 |
| H | 0.46397400  | 3.78816300  | -2.12079700 |
| P | -0.15797000 | 2.36336100  | -0.23755500 |
| C | -1.61941100 | 3.35709300  | 0.30365800  |
| C | -2.15498600 | 4.40083400  | -0.46870600 |
| C | -2.21569600 | 3.05937900  | 1.54139700  |
| C | -3.26525200 | 5.12112600  | -0.02185000 |
| H | -1.71132300 | 4.66645100  | -1.42247200 |
| C | -3.32256000 | 3.78397000  | 1.98543400  |
| H | -1.80029400 | 2.26854400  | -2.15769800 |

|    |             |             |             |
|----|-------------|-------------|-------------|
| C  | -3.85393900 | 4.81315600  | 1.20502700  |
| H  | -3.66639200 | 5.92403600  | -0.63490000 |
| H  | -3.76946700 | 3.54247500  | 2.94648800  |
| H  | -4.71762700 | 5.37412600  | 1.55248600  |
| C  | 1.27883400  | 3.24321300  | 0.51440900  |
| C  | 2.49498900  | 2.55589800  | 0.64572600  |
| C  | 1.20011000  | 4.58491900  | 0.92214800  |
| C  | 3.61356300  | 3.20810300  | 1.16984700  |
| H  | 2.57642800  | 1.51417800  | 0.34992000  |
| C  | 2.31993900  | 5.22756600  | 1.45008700  |
| H  | 0.26335400  | 5.12763900  | 0.84036700  |
| C  | 3.52981300  | 4.54034300  | 1.57496100  |
| H  | 4.54487500  | 2.65827600  | 1.27039000  |
| H  | 2.24414400  | 6.26382700  | 1.76967100  |
| H  | 4.39952500  | 5.04143600  | 1.99249800  |
| C  | -2.72761200 | 0.45833500  | -2.39502500 |
| C  | -3.51427600 | 0.73323700  | -1.26666300 |
| C  | -3.25920200 | 0.73188600  | -3.66804200 |
| C  | -4.79405400 | 1.27775300  | -1.40268700 |
| H  | -3.11404500 | 0.52857500  | -0.27809000 |
| C  | -4.53522100 | 1.27792700  | -3.80388500 |
| H  | -2.68643400 | 0.50345100  | -4.56252700 |
| C  | -5.30519100 | 1.55404500  | -2.67024600 |
| H  | -5.38255600 | 1.49234400  | -0.51512800 |
| H  | -4.93017600 | 1.48410500  | -4.79524600 |
| H  | -6.29877700 | 1.98101800  | -2.77790100 |
| C  | -1.27825600 | -1.99625800 | -2.86572800 |
| C  | -0.14669600 | -2.78392100 | -3.14375000 |
| C  | -2.55499400 | -2.55610400 | -3.04010200 |
| C  | -0.29748600 | -4.09045500 | -3.60915200 |
| H  | 0.84899400  | -2.38565100 | -2.97577100 |
| C  | -2.69714800 | -3.86673200 | -3.50153500 |
| H  | -3.44344300 | -1.97215000 | -2.82450700 |
| C  | -1.57004500 | -4.63624300 | -3.79151800 |
| H  | 0.58805000  | -4.68435100 | -3.81834700 |
| H  | -3.69286900 | -4.28193900 | -3.63462700 |
| H  | -1.68205400 | -5.65586400 | -4.15081600 |
| Pd | -0.27057500 | -0.05321100 | 0.09767400  |
| S  | 2.88640800  | -1.56604700 | -0.90611000 |
| O  | 2.93630900  | -3.04380500 | -0.81480400 |
| O  | 2.35300300  | -0.99046600 | -2.16225100 |
| N  | 2.10320400  | -0.84061500 | 0.31485800  |
| C  | 4.63745600  | -1.02489300 | -0.86037100 |
| C  | 5.64086400  | -1.97669600 | -1.04783800 |
| C  | 6.95981300  | -1.52417100 | -1.08540300 |
| H  | 5.37934900  | -3.02260400 | -1.15775800 |

|           |             |             |             |
|-----------|-------------|-------------|-------------|
| C         | 6.12335200  | 0.69827500  | -0.74990400 |
| C         | 7.20931200  | -0.16026500 | -0.93419300 |
| H         | 7.77742800  | -2.22517500 | -1.23047200 |
| H         | 6.27551700  | 1.76904200  | -0.62789400 |
| H         | 8.22046200  | 0.23461400  | -0.95699800 |
| C         | 2.35288500  | -1.18884400 | 1.63147800  |
| C         | 3.41264100  | -2.00502700 | 2.10678200  |
| C         | 1.49821400  | -0.60831400 | 2.61115600  |
| C         | 3.66006700  | -2.13605600 | 3.46537100  |
| H         | 4.04136200  | -2.53306700 | 1.40184500  |
| C         | 1.79138900  | -0.72536400 | 3.98396000  |
| C         | 2.86667700  | -1.48186400 | 4.42020900  |
| H         | 4.49107000  | -2.75876000 | 3.78905400  |
| H         | 1.13044400  | -0.23146900 | 4.68933400  |
| H         | 3.07594500  | -1.58619200 | 5.48072000  |
| N         | 4.85299500  | 0.27941200  | -0.71395800 |
| C         | 0.24131800  | 0.08846700  | 2.26261200  |
| O         | -0.25619700 | 0.96397200  | 2.94681600  |
| C         | -1.14005800 | -1.30416500 | 1.70567600  |
| C         | -2.13006200 | -1.19648500 | 2.60756300  |
| H         | -2.23610200 | -0.24319600 | 3.12171200  |
| C         | -0.72668700 | -2.08910000 | 0.62555100  |
| H         | 0.22227000  | -2.61944000 | 0.64531800  |
| H         | -1.47965600 | -2.50569400 | -0.04158000 |
| C         | -3.04011700 | -2.26137200 | 3.03840200  |
| C         | -4.08257800 | -1.93038400 | 3.92708300  |
| C         | -2.93286500 | -3.59971300 | 2.61045200  |
| C         | -4.99668000 | -2.89071200 | 4.35366800  |
| H         | -4.17223800 | -0.90432500 | 4.27619700  |
| C         | -3.84484500 | -4.55890500 | 3.04132400  |
| H         | -2.11859100 | -3.88792900 | 1.95348400  |
| C         | -4.88291000 | -4.21053100 | 3.91110200  |
| H         | -5.79508200 | -2.61024200 | 5.03567700  |
| H         | -3.74148100 | -5.58652100 | 2.70286800  |
| H         | -5.59100900 | -4.96337800 | 4.24657700  |
| <b>39</b> |             |             |             |
| S         | 0.00059300  | 2.60753300  | -1.28997300 |
| O         | -1.14381900 | 2.20084500  | -2.13445600 |
| O         | 0.30733200  | 4.04748600  | -1.19411900 |
| C         | 1.46749700  | 1.84579500  | -2.05491100 |
| C         | 2.61483200  | 2.62357900  | -2.20299100 |
| C         | 3.71465200  | 2.03904600  | -2.82870200 |
| H         | 2.62611800  | 3.64242400  | -1.83700100 |
| C         | 2.41431100  | 0.03944000  | -3.07310800 |
| C         | 3.61510800  | 0.72134500  | -3.27318700 |
| H         | 4.63652600  | 2.59878500  | -2.95151000 |

|   |             |             |             |
|---|-------------|-------------|-------------|
| H | 2.30110300  | -0.99193600 | -3.39899500 |
| H | 4.44885200  | 0.22661400  | -3.76171200 |
| N | 1.34794100  | 0.58782400  | -2.47632800 |
| C | -1.68922900 | 4.42488200  | 2.42161600  |
| C | -1.27408600 | 3.77862900  | 1.26300200  |
| C | -0.42318200 | 2.65216300  | 1.31898300  |
| C | -0.00007100 | 2.22090300  | 2.60734900  |
| C | -0.48192100 | 2.85295000  | 3.76639900  |
| C | -1.30934400 | 3.96391700  | 3.68779100  |
| H | -2.34414200 | 5.28826600  | 2.33197900  |
| H | -1.62860300 | 4.13482700  | 0.30519700  |
| C | 0.95789500  | 1.10522700  | 2.79568600  |
| H | -0.15564000 | 2.46054700  | 4.72503800  |
| H | -1.65234700 | 4.46573700  | 4.58814600  |
| C | 1.81108200  | -0.35542200 | 0.95956200  |
| H | 2.46856400  | -0.45041700 | 0.09439500  |
| O | 0.92055100  | 0.37721500  | 3.78801300  |
| C | 2.02918700  | 0.87522000  | 1.75638300  |
| C | 3.02710700  | 1.78684200  | 1.69470500  |
| H | 2.89691200  | 2.68615600  | 2.29806900  |
| N | -0.05525800 | 1.89446700  | 0.19211400  |
| H | 1.90081800  | -1.24464500 | 1.59043200  |
| C | 4.29048400  | 1.75848700  | 0.94453500  |
| C | 4.95163800  | 0.57464500  | 0.56110600  |
| C | 4.92362500  | 2.98312400  | 0.64808900  |
| C | 6.16896600  | 0.61874600  | -0.11759100 |
| H | 4.52451700  | -0.38609200 | 0.82731300  |
| C | 6.13984400  | 3.02779800  | -0.03029500 |
| H | 4.44411700  | 3.90940100  | 0.95634400  |
| C | 6.76882100  | 1.84306900  | -0.42311100 |
| H | 6.66092500  | -0.31091700 | -0.39381600 |
| H | 6.60243100  | 3.98834800  | -0.24414200 |
| H | 7.72288100  | 1.87346000  | -0.94307000 |
| P | -2.54949500 | -0.27240000 | -0.47051700 |
| C | -3.31945700 | -1.73936200 | 0.40714200  |
| H | -4.40886100 | -1.62978100 | 0.43990200  |
| H | -2.96674000 | -1.67445800 | 1.44252400  |
| C | -2.96853900 | -3.12646600 | -0.17358500 |
| H | -3.66127000 | -3.35381100 | -0.99172000 |
| H | -3.15360800 | -3.87083900 | 0.60964200  |
| C | -1.54359900 | -3.32908200 | -0.73066400 |
| H | -1.47039500 | -2.87250600 | -1.72302900 |
| H | -1.35270000 | -4.40039900 | -0.85908800 |
| P | -0.16386200 | -2.57868000 | 0.26846800  |
| C | 1.32513200  | -3.37658500 | -0.46810700 |
| C | 2.38168300  | -3.82854000 | 0.33752200  |

|              |             |                            |             |
|--------------|-------------|----------------------------|-------------|
| C            | 1.44333600  | -3.48771400                | -1.86395500 |
| C            | 3.52564700  | -4.38415700                | -0.23963900 |
| H            | 2.30898600  | -3.76052900                | 1.41827300  |
| C            | 2.58310300  | -4.05257800                | -2.43676200 |
| H            | 0.64718900  | -3.13345100                | -2.51223900 |
| C            | 3.62877600  | -4.50057500                | -1.62619800 |
| H            | 4.33327800  | -4.73064200                | 0.39939600  |
| H            | 2.65245400  | -4.14376300                | -3.51759000 |
| H            | 4.51662400  | -4.93916600                | -2.07328900 |
| C            | -0.34074200 | -3.36434900                | 1.92155900  |
| C            | -0.37045100 | -2.57587500                | 3.08079600  |
| C            | -0.47394100 | -4.76034300                | 2.03727400  |
| C            | -0.53355900 | -3.17416000                | 4.33388900  |
| H            | -0.24727400 | -1.49961000                | 3.02041700  |
| C            | -0.64160400 | -5.35141800                | 3.28803800  |
| H            | -0.43498400 | -5.38937300                | 1.15183500  |
| C            | -0.67313500 | -4.55748300                | 4.43913400  |
| H            | -0.54150300 | -2.54927300                | 5.22210200  |
| H            | -0.74440700 | -6.43050200                | 3.36550800  |
| H            | -0.80061200 | -5.02064100                | 5.41394500  |
| C            | -3.04004300 | -0.55491100                | -2.22464900 |
| C            | -2.06629100 | -0.50196600                | -3.23323600 |
| C            | -4.36709600 | -0.86517100                | -2.56724300 |
| C            | -2.41734200 | -0.76908200                | -4.55953200 |
| H            | -1.04743700 | -0.22174200                | -2.98307100 |
| C            | -4.71235900 | -1.13031300                | -3.89236800 |
| H            | -5.13787700 | -0.88777500                | -1.80108600 |
| C            | -3.73525800 | -1.08601500                | -4.89073200 |
| H            | -1.65841600 | -0.71460900                | -5.33563900 |
| H            | -5.74240900 | -1.36736000                | -4.14564900 |
| H            | -4.00464500 | -1.29001600                | -5.92382700 |
| C            | -3.63146400 | 1.10075000                 | 0.10687800  |
| C            | -4.03149000 | 1.16275200                 | 1.45177100  |
| C            | -4.04183000 | 2.11472800                 | -0.77258000 |
| C            | -4.84686900 | 2.20138100                 | 1.90140800  |
| H            | -3.70620100 | 0.40646500                 | 2.16025800  |
| C            | -4.85913000 | 3.15050900                 | -0.31784800 |
| H            | -3.70837000 | 2.10452500                 | -1.80361000 |
| C            | -5.26849600 | 3.19462100                 | 1.01612300  |
| H            | -5.14744100 | 2.23410700                 | 2.94506400  |
| H            | -5.17178000 | 3.92689900                 | -1.01107500 |
| H            | -5.90550500 | 4.00270600                 | 1.36597600  |
| Pd           | -0.17962500 | -0.27725300                | 0.19672200  |
| <b>40-ts</b> |             |                            |             |
| S            | 0.21820400  | 1.94329500                 | -1.41115200 |
| O            | 0.58921900  | 0.67270100 <sub>S161</sub> | -2.07287200 |

|   |             |             |             |
|---|-------------|-------------|-------------|
| O | -1.07178300 | 2.56518700  | -1.75252500 |
| C | 1.50762500  | 3.14162200  | -1.87592100 |
| C | 2.50716800  | 2.75912000  | -2.77152300 |
| C | 3.45470100  | 3.72330300  | -3.11600400 |
| H | 2.52949300  | 1.75313000  | -3.17142800 |
| C | 2.31721600  | 5.25760600  | -1.66234400 |
| C | 3.36256000  | 4.99530100  | -2.55101800 |
| H | 4.25259000  | 3.48192300  | -3.81284800 |
| H | 2.21257100  | 6.23537500  | -1.19717800 |
| H | 4.08313900  | 5.77133200  | -2.79011400 |
| N | 1.39337600  | 4.34892200  | -1.33180300 |
| C | -1.30445300 | 4.26807100  | 2.31769000  |
| C | -1.12190900 | 3.25647400  | 1.37827300  |
| C | 0.15484600  | 2.72570400  | 1.14614700  |
| C | 1.25504300  | 3.22501200  | 1.88419300  |
| C | 1.04882000  | 4.24201900  | 2.82957200  |
| C | -0.22051700 | 4.76055000  | 3.05373400  |
| H | -2.30288000 | 4.66576100  | 2.48010100  |
| H | -1.96027600 | 2.87223000  | 0.81180100  |
| C | 2.65619000  | 2.77369100  | 1.63826900  |
| H | 1.91436400  | 4.61605800  | 3.36725400  |
| H | -0.36897100 | 5.54301200  | 3.79278100  |
| C | 1.79104600  | 0.47113900  | 1.07576600  |
| H | 2.01055800  | -0.51294600 | 0.68741100  |
| O | 3.61305500  | 3.45749300  | 1.98812500  |
| C | 2.85087300  | 1.45722700  | 0.93247600  |
| C | 4.04599300  | 1.26384500  | 0.30819600  |
| H | 4.76561500  | 2.06540500  | 0.47106100  |
| N | 0.34548800  | 1.66853500  | 0.20931300  |
| H | 1.29899100  | 0.45490600  | 2.04478200  |
| C | 4.53532600  | 0.13483300  | -0.48248600 |
| C | 3.70815600  | -0.69238000 | -1.27085900 |
| C | 5.92181300  | -0.12302200 | -0.47387000 |
| C | 4.25023200  | -1.76321400 | -1.98060200 |
| H | 2.65097400  | -0.46803400 | -1.37125500 |
| C | 6.45787600  | -1.19836900 | -1.17748700 |
| H | 6.57450800  | 0.52187500  | 0.10960700  |
| C | 5.62140900  | -2.02841400 | -1.92863900 |
| H | 3.59517100  | -2.38954900 | -2.58017100 |
| H | 7.52779100  | -1.38619500 | -1.14441600 |
| H | 6.03737100  | -2.86578800 | -2.48256600 |
| P | -0.27979000 | -2.62305200 | 1.04566300  |
| C | -1.78444500 | -3.49972700 | 1.73102500  |
| H | -1.91216800 | -3.17909900 | 2.77151500  |
| H | -1.58858500 | -4.57827400 | 1.75460500  |
| C | -3.08750000 | -3.22744200 | 0.95149200  |

|   |             |             |             |
|---|-------------|-------------|-------------|
| H | -3.80826500 | -3.99859800 | 1.25304800  |
| H | -2.92631000 | -3.37850400 | -0.12355600 |
| C | -3.74869900 | -1.85466800 | 1.20925900  |
| H | -3.63069100 | -1.59358400 | 2.26837500  |
| H | -4.82639200 | -1.92918000 | 1.02202100  |
| P | -3.04532200 | -0.43468300 | 0.20816800  |
| C | -4.21050700 | 0.94384500  | 0.62489000  |
| C | -4.25178200 | 2.05770800  | -0.23633700 |
| C | -4.98099200 | 0.97951300  | 1.79828100  |
| C | -5.05243200 | 3.15921800  | 0.06174200  |
| H | -3.64192000 | 2.06856500  | -1.13571400 |
| C | -5.77907700 | 2.08758300  | 2.09675900  |
| H | -4.97293300 | 0.14279800  | 2.48978500  |
| C | -5.82093000 | 3.17937200  | 1.22985200  |
| H | -5.07176800 | 4.00596600  | -0.61946900 |
| H | -6.37170300 | 2.09108500  | 3.00836300  |
| H | -6.44400700 | 4.03924300  | 1.46136300  |
| C | -3.60921000 | -0.86395300 | -1.50570400 |
| C | -4.93331900 | -1.24009700 | -1.78913900 |
| C | -2.68818600 | -0.78735200 | -2.56012300 |
| C | -5.32115500 | -1.54938900 | -3.09195800 |
| H | -5.67301600 | -1.27886200 | -0.99354200 |
| C | -3.07966500 | -1.09163400 | -3.86745600 |
| H | -1.66931300 | -0.46990500 | -2.35992100 |
| C | -4.39251800 | -1.47785900 | -4.13482400 |
| H | -6.34884400 | -1.83972200 | -3.29566500 |
| H | -2.35545600 | -1.01921400 | -4.67463300 |
| H | -4.69666300 | -1.71526400 | -5.15110900 |
| C | 1.03025100  | -3.02825000 | 2.28432500  |
| C | 0.78793900  | -2.86920800 | 3.66181200  |
| C | 2.34134500  | -3.33094500 | 1.87334500  |
| C | 1.80926300  | -3.04490200 | 4.59484000  |
| H | -0.20425700 | -2.60208600 | 4.01538400  |
| C | 3.36412500  | -3.49966100 | 2.80915100  |
| H | 2.56509600  | -3.44699700 | 0.81713600  |
| C | 3.10246800  | -3.36438600 | 4.17303300  |
| H | 1.59400000  | -2.92960100 | 5.65410800  |
| H | 4.36756800  | -3.73879300 | 2.46667100  |
| H | 3.89830600  | -3.49845800 | 4.90052600  |
| C | 0.16234400  | -3.69912900 | -0.39524800 |
| C | 0.33721700  | -5.08833100 | -0.27287800 |
| C | 0.32566500  | -3.10653000 | -1.65631200 |
| C | 0.66008300  | -5.86522700 | -1.38506600 |
| H | 0.23673900  | -5.56684300 | 0.69797800  |
| C | 0.64585200  | -3.88640100 | -2.77211100 |
| H | 0.20148900  | -2.03174300 | -1.75871600 |



|                          |             |             |             |
|--------------------------|-------------|-------------|-------------|
| C                        | 0.81233200  | -5.26508800 | -2.63861000 |
| H                        | 0.79350900  | -6.93832200 | -1.27446800 |
| H                        | 0.75954000  | -3.41312600 | -3.74397000 |
| H                        | 1.06018600  | -5.87218400 | -3.50549200 |
| Pd                       | -0.64383900 | -0.41527800 | 0.53829400  |
| <b>NEt<sub>3</sub></b>   |             |             |             |
| N                        | 0.14736200  | -0.00814800 | 0.32939400  |
| C                        | -0.25368900 | -1.12415100 | -0.53026600 |
| C                        | -1.22584900 | -2.09627000 | 0.14278600  |
| H                        | 0.65515700  | -1.67755700 | -0.78889500 |
| H                        | -0.68173700 | -0.77954200 | -1.49222700 |
| H                        | -1.38006100 | -2.97396200 | -0.49526200 |
| H                        | -0.82422700 | -2.43221100 | 1.10488300  |
| H                        | -2.20879500 | -1.64754700 | 0.32222300  |
| C                        | -0.94521500 | 0.89231000  | 0.71074300  |
| C                        | -1.61992200 | 1.69902100  | -0.41499400 |
| H                        | -0.54077200 | 1.58990700  | 1.45552900  |
| H                        | -1.70605900 | 0.30248100  | 1.23443900  |
| H                        | -2.40038900 | 2.34605600  | 0.00296300  |
| H                        | -0.90225900 | 2.34017900  | -0.93964700 |
| H                        | -2.09449700 | 1.04920900  | -1.15891300 |
| C                        | 1.32809900  | 0.69868900  | -0.17674700 |
| C                        | 2.63502400  | -0.05654500 | 0.08597000  |
| H                        | 1.37897700  | 1.66465500  | 0.34002400  |
| H                        | 1.24762800  | 0.93082800  | -1.25641100 |
| H                        | 3.49144900  | 0.53768800  | -0.25444500 |
| H                        | 2.75013500  | -0.25564800 | 1.15650100  |
| H                        | 2.67322900  | -1.01582800 | -0.44147300 |
| <b>Et<sub>3</sub>NHI</b> |             |             |             |
| N                        | 1.36436600  | 0.18365000  | -0.02975100 |
| C                        | 1.84712000  | -0.20843000 | 1.34223100  |
| C                        | 1.50947400  | -1.64802800 | 1.71754700  |
| H                        | 1.34890600  | 0.47237500  | 2.03407700  |
| H                        | 2.92348100  | -0.01231800 | 1.38592500  |
| H                        | 1.74645800  | -1.79201800 | 2.77660600  |
| H                        | 0.44182700  | -1.84476200 | 1.57788300  |
| H                        | 2.08769300  | -2.38136300 | 1.14736400  |
| C                        | 1.76801000  | -0.76013700 | -1.13430300 |
| C                        | 3.27048500  | -0.89287400 | -1.35363000 |
| H                        | 1.26192800  | -0.39100500 | -2.03010800 |
| H                        | 1.31148200  | -1.72173400 | -0.89425000 |
| H                        | 3.43845200  | -1.60184200 | -2.17075500 |
| H                        | 3.73880700  | 0.05329000  | -1.64161000 |
| H                        | 3.78789100  | -1.28267000 | -0.47101200 |
| C                        | 1.66668700  | 1.62070200  | -0.37367000 |
| C                        | 1.02555800  | 2.62709700  | 0.57778300  |

|           |             |             |             |
|-----------|-------------|-------------|-------------|
| H         | 1.27254500  | 1.76487800  | -1.38323100 |
| H         | 2.75446800  | 1.73339700  | -0.40744800 |
| H         | 1.15690400  | 3.62864900  | 0.15538400  |
| H         | -0.04748000 | 2.43725200  | 0.67849100  |
| H         | 1.48795000  | 2.62644400  | 1.56911800  |
| H         | 0.28527600  | 0.10507000  | -0.00718400 |
| I         | -1.98247500 | -0.14168200 | -0.12767400 |
| <b>CO</b> |             |             |             |
| C         | 0.00000000  | 0.00000000  | -0.65013800 |
| O         | 0.00000000  | 0.00000000  | 0.48760300  |
